# Supplementary material for: The Role of Aberrant DNA Methylation in Misregulation of Gene Expression in Gonadotroph Nonfunctioning Pituitary Tumors
Source: Cancers (Basel). 2019 Oct 25;11(11):1650. doi: 10.3390/cancers11111650 (PMC6895980; doi:10.3390/cancers11111650)
Supplement: Supplementary file 1 [file cancers-11-01650-s001.xlsx]

## Sheet: Table S1
Supplementary Table S1
The list of gene-annotated CpG sites (HM450K probes) differentially methylated in NFPAs and normal pituitary
	CpG site	tumor_avg	normal_avg	deltaBeta	P,Value	adj,P,Val	gene	feature	cgi
1	cg18780288	0.825006	0.117842	0.707164	2.97592e-11	3.50157e-09	XPNPEP1	Body	opensea
2	cg14832998	0.803372	0.107123	0.696249	5.76136e-08	2.36049e-06	PTPRN2	Body	opensea
3	cg12131007	0.758977	0.066382	0.692595	6.66006e-08	2.67516e-06	MYO3B	Body	opensea
4	cg04191427	0.797851	0.107861	0.68999	4.4203e-08	1.87659e-06	RPTOR	Body	shore
5	cg21557473	0.78705	0.0973202	0.68973	3.64566e-10	3.04195e-08	AUTS2	Body	opensea
6	cg01406381	0.863003	0.174927	0.688076	8.62378e-12	1.2131e-09	SLC1A5	TSS200	shelf
7	cg02712036	0.803808	0.116661	0.687147	2.24181e-08	1.05166e-06	RAB27A	5'UTR	opensea
8	cg00791854	0.746368	0.0603101	0.686058	5.35959e-07	1.57339e-05	IL6R	Body	opensea
9	cg14799927	0.788018	0.102161	0.685857	1.51732e-11	1.97188e-09	TRIM26	5'UTR	opensea
10	cg22502382	0.791445	0.114296	0.677149	1.38761e-08	6.9549e-07	FGD4	5'UTR	opensea
11	cg26337070	0.840768	0.164236	0.676532	3.48032e-13	7.7371e-11	ATOH8	Body	opensea
12	cg04906816	0.806274	0.134244	0.67203	4.95119e-09	2.88582e-07	C14orf181	TSS200	shore
13	cg10177032	0.710432	0.039399	0.671033	4.13659e-07	1.2625e-05	ADCY9	Body	opensea
14	cg20495404	0.743466	0.0743691	0.669097	1.71153e-07	5.97673e-06	ID2	3'UTR	shore
15	cg26764244	0.715216	0.0476066	0.66761	1.11358e-08	5.77249e-07	GNG12	TSS1500	shore
16	cg24951100	0.821026	0.155711	0.665315	7.70212e-14	2.12297e-11	FRMD4A	Body	opensea
17	cg25179876	0.840418	0.181731	0.658687	5.95606e-09	3.38872e-07	NRP1	Body	opensea
18	cg10087036	0.797039	0.13895	0.658088	5.04695e-10	4.02355e-08	ITPRIPL2	1stExon	shelf
19	cg10031995	0.742637	0.0871031	0.655534	5.00418e-10	3.99726e-08	PRR5	TSS1500	shore
20	cg19600538	0.78126	0.12596	0.655299	8.24413e-09	4.46153e-07	SLC44A3	Body	opensea
21	cg09547756	0.811654	0.157156	0.654497	2.01405e-10	1.81361e-08	PIP5K1C	Body	island
22	cg14276379	0.819249	0.167416	0.651833	3.03476e-08	1.36193e-06	C9orf3	Body	opensea
23	cg14758218	0.761959	0.111553	0.650407	4.468e-09	2.64199e-07	NEAT1	Body	shelf
24	cg04525491	0.676747	0.0265606	0.650186	2.95262e-07	9.4685e-06	ID2	3'UTR	shore
25	cg04598300	0.677099	0.0315248	0.645574	1.33302e-06	3.39318e-05	STAT3	5'UTR	opensea
26	cg12018521	0.269065	0.914303	-0.645238	1.66102e-08	8.1334e-07	TES	Body	opensea
27	cg08726522	0.805523	0.16096	0.644563	7.92231e-10	5.92234e-08	ST5	Body	opensea
28	cg15100426	0.80283	0.15931	0.64352	7.88578e-11	8.1297e-09	PNKD	TSS1500	shore
29	cg18106582	0.770159	0.127455	0.642704	2.38371e-08	1.10664e-06	SNX18	1stExon	shore
30	cg25801976	0.785054	0.143406	0.641648	9.24433e-07	2.49264e-05	KIAA0146	3'UTR	shore
31	cg01525976	0.295278	0.932088	-0.63681	5.54497e-08	2.28671e-06	PTPRR	Body	opensea
32	cg10338785	0.270751	0.905828	-0.635077	1.0139e-08	5.32112e-07	C11orf93	5'UTR	shelf
33	cg19792194	0.282577	0.917048	-0.634471	2.01481e-07	6.86651e-06	FEZ1	Body	opensea
34	cg19628600	0.801594	0.167836	0.633758	6.90161e-09	3.85043e-07	FOXP1	Body	opensea
35	cg01352090	0.761035	0.129481	0.631554	4.33485e-07	1.31369e-05	ADCY9	Body	opensea
36	cg23889684	0.786263	0.154852	0.631411	7.3337e-11	7.63189e-09	APOL3	5'UTR	opensea
37	cg04696969	0.211966	0.842089	-0.630123	2.52934e-09	1.62184e-07	SGPP2	Body	opensea
38	cg04408104	0.787042	0.157104	0.629938	7.94255e-09	4.32471e-07	WDSUB1	Body	opensea
39	cg19851816	0.777291	0.147953	0.629338	1.64855e-09	1.11898e-07	TUBGCP6	Body	island
40	cg21382890	0.714877	0.0860665	0.628811	5.83226e-08	2.38541e-06	NFE2L2	Body	opensea
41	cg03126579	0.756983	0.128995	0.627987	1.12211e-09	7.99012e-08	ZFR2	Body	island
42	cg21171461	0.730112	0.102423	0.627689	4.38154e-08	1.86343e-06	RAPGEF1	Body	opensea
43	cg06638451	0.848692	0.223526	0.625166	6.32214e-13	1.27298e-10	FAM107A	1stExon	opensea
44	cg18747283	0.219445	0.843244	-0.623799	9.4374e-09	5.00533e-07	ADAMTS17	Body	opensea
45	cg04403415	0.651733	0.0279546	0.623778	1.09303e-06	2.87447e-05	NCOR2	5'UTR	opensea
46	cg06573254	0.278557	0.900027	-0.62147	1.16875e-07	4.31903e-06	SFXN1	5'UTR	shelf
47	cg10201791	0.235429	0.856682	-0.621253	3.49492e-08	1.53699e-06	ZNF277	Body	opensea
48	cg25217276	0.73066	0.10997	0.620689	2.18703e-08	1.03046e-06	GNG4	5'UTR	opensea
49	cg14044785	0.780738	0.160151	0.620588	5.21407e-09	3.02005e-07	THADA	Body	opensea
50	cg01798157	0.719498	0.099828	0.61967	9.74203e-09	5.14348e-07	BTG2	3'UTR	shore
51	cg02633413	0.810806	0.192057	0.61875	2.66052e-10	2.31414e-08	UNC5A	Body	shore
52	cg17740322	0.710214	0.0918508	0.618363	2.23459e-07	7.48481e-06	C10orf26	TSS1500	opensea
53	cg17691545	0.824834	0.206724	0.61811	9.00413e-10	6.60636e-08	SLC10A6	TSS200	opensea
54	cg21050240	0.705548	0.0885122	0.617036	1.99743e-08	9.53911e-07	LTBP4	Body	shore
55	cg04163638	0.82617	0.210682	0.615488	1.68356e-11	2.14958e-09	FAM49A	5'UTR	opensea
56	cg27485596	0.765126	0.150245	0.614881	1.41466e-10	1.34678e-08	ARHGEF7	Body	opensea
57	cg13521620	0.812589	0.199017	0.613572	2.09316e-10	1.87594e-08	YPEL2	5'UTR	shore
58	cg08539965	0.794057	0.180674	0.613383	5.99666e-11	6.39716e-09	EIF4G3	5'UTR	opensea
59	cg21667836	0.810846	0.197906	0.61294	4.33053e-10	3.53531e-08	PRMT8	TSS1500	shore
60	cg15836733	0.309411	0.922	-0.612589	1.92199e-09	1.27592e-07	STARD9	Body	shore
61	cg11743000	0.801396	0.189863	0.611534	2.23413e-07	7.48389e-06	JAK1	5'UTR	opensea
62	cg01786466	0.318579	0.929152	-0.610573	3.5021e-07	1.09637e-05	MPP4	5'UTR	opensea
63	cg08038033	0.753029	0.143693	0.609337	8.90354e-09	4.76091e-07	FOXP1	5'UTR	opensea
64	cg14570632	0.871316	0.262329	0.608987	4.88617e-16	3.05247e-13	RXRA	Body	opensea
65	cg14480116	0.736854	0.128544	0.608309	5.45971e-09	3.14376e-07	SPRED2	TSS1500	opensea
66	cg12575928	0.773497	0.165287	0.60821	1.25439e-07	4.58951e-06	GAS2	TSS1500	shore
67	cg27301231	0.307484	0.915646	-0.608162	1.92272e-07	6.60731e-06	C3orf59	Body	opensea
68	cg01235820	0.838147	0.230164	0.607983	9.16876e-13	1.74535e-10	SCRT2	3'UTR	island
69	cg00764109	0.762456	0.154793	0.607663	4.71796e-10	3.80063e-08	SYT6	TSS1500	shore
70	cg20988565	0.18326	0.790357	-0.607097	4.11911e-10	3.38234e-08	ZFPM2	Body	shelf
71	cg05056497	0.753788	0.147496	0.606292	1.29381e-08	6.55156e-07	RCAN1	5'UTR	opensea
72	cg18474072	0.856221	0.250255	0.605966	6.51647e-15	2.65832e-12	DIP2C	Body	opensea
73	cg18214661	0.740777	0.135337	0.605439	4.98004e-09	2.90056e-07	PDGFRL	Body	opensea
74	cg02861178	0.730309	0.125157	0.605152	5.77119e-08	2.36375e-06	C20orf94	Body	opensea
75	cg13184736	0.756833	0.15177	0.605063	1.11888e-08	5.79597e-07	GNG12	TSS1500	shore
76	cg24500959	0.689638	0.0845941	0.605044	1.34102e-09	9.31e-08	MARVELD1	Body	shore
77	cg01296918	0.233957	0.838976	-0.605018	1.13755e-10	1.11283e-08	MYO18B	Body	opensea
78	cg12686055	0.792029	0.187223	0.604806	8.54025e-09	4.59618e-07	ANO6	Body	opensea
79	cg24368383	0.720591	0.116718	0.603873	3.18269e-09	1.97828e-07	MIB2	Body	island
80	cg18923740	0.760932	0.157081	0.603851	8.47642e-11	8.65548e-09	NBL1	Body	island
81	cg07327299	0.823063	0.219481	0.603582	8.61427e-10	6.36232e-08	GRB7	5'UTR	opensea
82	cg26662324	0.692427	0.0891107	0.603316	3.05387e-07	9.74722e-06	CTBP2	5'UTR	opensea
83	cg11430077	0.213841	0.816216	-0.602375	1.92666e-05	0.000320761	GATA3	Body	shore
84	cg26928858	0.79339	0.191346	0.602044	1.72986e-08	8.41898e-07	CCDC57	Body	opensea
85	cg13119182	0.872849	0.271067	0.601782	5.60496e-12	8.3357e-10	SLC10A6	TSS1500	opensea
86	cg13037245	0.824893	0.2234	0.601493	4.30919e-10	3.52e-08	LOC100130987	Body	shore
87	cg06224721	0.170423	0.771713	-0.60129	3.26787e-11	3.77325e-09	LOC100189589	TSS1500	opensea
88	cg00223767	0.730501	0.129417	0.601085	1.38249e-06	3.49858e-05	UVRAG	Body	opensea
89	cg25784219	0.746993	0.146128	0.600865	1.19435e-06	3.09859e-05	FOSL2	Body	shore
90	cg25625968	0.872074	0.271538	0.600535	7.71178e-10	5.78829e-08	EGFLAM	3'UTR	opensea
91	cg15774510	0.67898	0.0784891	0.600491	2.2355e-07	7.48665e-06	FAS	TSS1500	shore
92	cg26889659	0.787353	0.187851	0.599502	5.50898e-08	2.27416e-06	EXOC2	5'UTR	opensea
93	cg14167389	0.671648	0.0726661	0.598982	9.50951e-08	3.62111e-06	MTMR9L	TSS1500	shore
94	cg25132536	0.84426	0.245732	0.598527	1.21928e-10	1.18033e-08	EPN2	5'UTR	opensea
95	cg25181684	0.68735	0.0895047	0.597845	4.82624e-07	1.43866e-05	SH3PXD2A	Body	shelf
96	cg19714347	0.781319	0.184334	0.596985	3.86525e-11	4.37365e-09	TRIM26	5'UTR	opensea
97	cg07830557	0.798584	0.20205	0.596534	3.02434e-11	3.54729e-09	SH3GL1	Body	shelf
98	cg09606564	0.771938	0.175725	0.596213	5.49944e-07	1.60774e-05	MFAP4	Body	opensea
99	cg13289884	0.718628	0.123127	0.595501	5.94084e-07	1.71622e-05	CDKN1B	3'UTR	shore
100	cg01399219	0.74322	0.147767	0.595453	4.52376e-08	1.91612e-06	AEBP1	Body	opensea
101	cg00812557	0.745622	0.150333	0.595289	1.04379e-09	7.51502e-08	TBC1D1	Body	opensea
102	cg10204320	0.695646	0.100552	0.595094	4.32831e-09	2.57464e-07	MTMR9L	TSS1500	shore
103	cg10813980	0.857087	0.262287	0.5948	1.6042e-10	1.50337e-08	FAM49A	5'UTR	opensea
104	cg16665765	0.86742	0.272668	0.594752	1.53754e-13	3.88613e-11	CTDSPL	Body	opensea
105	cg01778994	0.763144	0.168665	0.594479	5.46395e-10	4.29886e-08	ST3GAL1	5'UTR	opensea
106	cg11671265	0.739313	0.145227	0.594085	1.71936e-08	8.37187e-07	CNOT6L	Body	opensea
107	cg20834178	0.781583	0.187904	0.593679	2.37913e-08	1.10502e-06	TBC1D14	Body	opensea
108	cg19979108	0.871501	0.27796	0.593541	8.21784e-12	1.16776e-09	SH3PXD2B	Body	opensea
109	cg14120049	0.730067	0.136849	0.593218	6.90862e-12	1.00517e-09	HSPB6	3'UTR	island
110	cg22590902	0.813809	0.221851	0.591958	3.08184e-11	3.60231e-09	AGBL1	Body	opensea
111	cg14966782	0.834786	0.243762	0.591024	3.6274e-14	1.11512e-11	SH3RF3	Body	opensea
112	cg09098195	0.900934	0.310002	0.590933	3.84977e-16	2.49901e-13	BEND4	TSS1500	shore
113	cg26372517	0.834277	0.243961	0.590316	1.88842e-10	1.71917e-08	TFAP2E	5'UTR	island
114	cg07390647	0.681074	0.0908032	0.59027	4.88945e-06	0.00010175	ST3GAL6	5'UTR	shore
115	cg16658931	0.730747	0.14091	0.589837	6.38541e-07	1.82349e-05	SHANK1	Body	island
116	cg05869699	0.696483	0.106662	0.589821	9.59049e-07	2.57232e-05	TSPAN14	Body	opensea
117	cg25189904	0.786747	0.197545	0.589203	7.17967e-08	2.85159e-06	GNG12	TSS1500	shore
118	cg01184784	0.755681	0.166501	0.58918	4.18224e-08	1.78949e-06	ID2	3'UTR	shore
119	cg00735611	0.790047	0.200972	0.589075	1.08406e-12	2.02579e-10	GRB7	5'UTR	opensea
120	cg04586622	0.876315	0.287385	0.58893	5.06225e-12	7.63434e-10	ADCY3	Body	opensea
121	cg00086710	0.771954	0.183161	0.588793	2.25079e-07	7.52955e-06	PPM1K	5'UTR	shore
122	cg06776644	0.856675	0.267925	0.588751	2.59339e-10	2.26094e-08	C11orf75	5'UTR	opensea
123	cg04389398	0.785544	0.196993	0.588551	1.92496e-12	3.32178e-10	ORC5L	3'UTR	opensea
124	cg01636650	0.742072	0.154223	0.587849	1.24556e-08	6.3427e-07	VILL	Body	island
125	cg16643088	0.676579	0.0892209	0.587358	1.65812e-06	4.0861e-05	CSRNP1	5'UTR	shelf
126	cg04089901	0.827981	0.240934	0.587048	7.39879e-08	2.92325e-06	COL28A1	Body	opensea
127	cg19160629	0.814951	0.228186	0.586765	2.3415e-10	2.06572e-08	SIK3	Body	opensea
128	cg11880010	0.846449	0.259708	0.586741	1.60592e-07	5.65831e-06	PRUNE2	Body	opensea
129	cg21746120	0.769644	0.182924	0.586719	1.75728e-10	1.61674e-08	LRP5	Body	opensea
130	cg14789828	0.761568	0.174882	0.586686	2.52344e-10	2.20619e-08	AHNAK	3'UTR	opensea
131	cg18022012	0.677857	0.0920489	0.585808	7.94392e-07	2.19051e-05	HPCAL1	5'UTR	shore
132	cg24982682	0.739492	0.153756	0.585736	4.19773e-09	2.51161e-07	ZMIZ1	5'UTR	opensea
133	cg18229178	0.724473	0.138913	0.58556	1.10048e-11	1.49494e-09	HSPB6	3'UTR	island
134	cg06935361	0.34089	0.926411	-0.585521	6.3693e-06	0.000126815	BRCA2	Body	opensea
135	cg23045716	0.793198	0.208628	0.584571	7.54395e-08	2.97196e-06	LOC100130872	Body	shore
136	cg10163955	0.324873	0.909176	-0.584303	6.9282e-06	0.000136082	GATA3	Body	shore
137	cg14294859	0.810476	0.226732	0.583743	4.24364e-07	1.29065e-05	SLC25A25	Body	opensea
138	cg22544881	0.842142	0.258663	0.583479	4.31035e-12	6.64535e-10	FLJ43663	Body	opensea
139	cg07377994	0.867657	0.284593	0.583063	2.17911e-11	2.6832e-09	MSI2	Body	opensea
140	cg19683675	0.819193	0.236726	0.582467	5.04388e-12	7.61508e-10	FGF1	TSS200	opensea
141	cg10271880	0.808885	0.22805	0.580835	9.48045e-13	1.79214e-10	ZDHHC22	TSS1500	shore
142	cg24068006	0.813711	0.233479	0.580232	5.9799e-08	2.43651e-06	DIP2C	Body	shore
143	cg26843110	0.850152	0.27016	0.579992	2.36248e-12	3.95464e-10	EDC3	Body	opensea
144	cg07927257	0.861682	0.282177	0.579506	2.02785e-14	6.81456e-12	ATXN2	Body	shelf
145	cg08906309	0.910844	0.331358	0.579486	2.44989e-18	4.80484e-15	LOC100128288	Body	opensea
146	cg07541559	0.825734	0.246422	0.579312	4.51238e-10	3.66324e-08	ABTB2	Body	opensea
147	cg25135018	0.822658	0.243511	0.579147	3.4611e-15	1.5414e-12	IL6R	Body	opensea
148	cg14245804	0.747315	0.168773	0.578542	2.58847e-08	1.18898e-06	LRP5	Body	shore
149	cg15456414	0.901282	0.323065	0.578216	6.81966e-14	1.9081e-11	ARNT2	Body	opensea
150	cg16085649	0.865943	0.288649	0.577294	3.10722e-13	7.04589e-11	AKAP13	Body	opensea
151	cg25104397	0.759363	0.182134	0.577228	9.18345e-07	2.47787e-05	C10orf26	5'UTR	opensea
152	cg18188328	0.80686	0.229723	0.577137	5.06559e-10	4.03525e-08	JARID2	Body	opensea
153	cg18334392	0.830625	0.253571	0.577054	6.34182e-10	4.87117e-08	SNORD123	TSS1500	shore
154	cg26084141	0.69223	0.115304	0.576926	1.40755e-09	9.71727e-08	PDIA5	Body	shore
155	cg20388732	0.815364	0.238853	0.576511	5.50247e-09	3.16413e-07	STAT5A	TSS200	shore
156	cg00755546	0.64843	0.0721203	0.57631	2.61808e-09	1.67296e-07	NBL1	Body	island
157	cg13470673	0.78501	0.208829	0.576182	5.4777e-07	1.60265e-05	ZBTB20	5'UTR	opensea
158	cg27377863	0.751011	0.175621	0.57539	2.9437e-10	2.52757e-08	TPM4	Body	shore
159	cg03460527	0.627425	0.0526362	0.574789	1.62922e-06	4.02603e-05	F3	TSS1500	shore
160	cg23519637	0.671044	0.096386	0.574658	9.55315e-06	0.000178365	C7orf50	Body	shore
161	cg14781262	0.360101	0.934349	-0.574249	1.47358e-06	3.69745e-05	FAM196B	5'UTR	opensea
162	cg19854744	0.728433	0.15436	0.574073	2.72497e-08	1.24259e-06	FOXR1	Body	opensea
163	cg22356428	0.865712	0.291881	0.573831	1.42463e-16	1.11762e-13	RASSF5	Body	opensea
164	cg14289461	0.871427	0.297711	0.573716	1.86485e-11	2.34726e-09	LAMA4	TSS200	shore
165	cg24186398	0.879812	0.306149	0.573663	3.22376e-15	1.44064e-12	TOLLIP	Body	opensea
166	cg12233487	0.820762	0.247274	0.573488	2.37947e-09	1.53929e-07	TMC2	TSS200	opensea
167	cg09612929	0.652692	0.0796878	0.573004	8.68612e-07	2.36322e-05	PDE2A	Body	shore
168	cg26905768	0.863387	0.290405	0.572981	3.79078e-12	5.92721e-10	BMPER	Body	opensea
169	cg02822963	0.309763	0.882724	-0.572961	1.0921e-05	0.000199504	COMMD2	TSS1500	shore
170	cg09080522	0.850344	0.27741	0.572934	5.70792e-09	3.26484e-07	PARVG	TSS1500	opensea
171	cg01266916	0.643578	0.0709859	0.572592	1.18242e-06	3.07292e-05	MMP9	Body	island
172	cg26054548	0.309379	0.881785	-0.572407	6.2757e-08	2.5418e-06	CADPS	Body	opensea
173	cg20543681	0.848151	0.276005	0.572146	3.8004e-11	4.31007e-09	SCRT2	3'UTR	island
174	cg23320499	0.763124	0.191073	0.572051	4.07079e-08	1.74767e-06	DUSP16	Body	opensea
175	cg20059337	0.763438	0.192066	0.571371	1.84924e-09	1.23547e-07	AFF3	Body	opensea
176	cg26413942	0.711051	0.139901	0.57115	1.1615e-05	0.00020992	ZNF608	TSS1500	opensea
177	cg14096180	0.804972	0.234239	0.570733	1.55665e-08	7.6879e-07	CLCF1	1stExon	shore
178	cg12918213	0.783	0.212673	0.570327	5.46429e-08	2.258e-06	MED13L	Body	opensea
179	cg03540589	0.732643	0.162391	0.570251	6.4838e-07	1.84732e-05	CSRNP1	5'UTR	shore
180	cg01779559	0.814741	0.244926	0.569814	9.86361e-09	5.19596e-07	ZFHX3	Body	opensea
181	cg22430985	0.748895	0.179232	0.569663	3.59532e-08	1.57487e-06	AFAP1	Body	opensea
182	cg20415053	0.794111	0.225005	0.569106	1.36627e-10	1.30528e-08	CATSPER4	Body	opensea
183	cg19750321	0.905061	0.336027	0.569034	2.42317e-18	4.79858e-15	ARNT	Body	opensea
184	cg22711082	0.876754	0.30806	0.568694	4.22339e-14	1.26963e-11	FAM131C	Body	shelf
185	cg03125341	0.837508	0.268934	0.568573	1.72377e-11	2.19336e-09	ZDHHC14	Body	opensea
186	cg27094244	0.731359	0.163181	0.568177	1.12562e-09	8.01226e-08	SYT7	Body	island
187	cg16701848	0.872532	0.304431	0.568101	3.42894e-14	1.06616e-11	GNG7	5'UTR	island
188	cg15425670	0.838553	0.271019	0.567534	2.18359e-13	5.23984e-11	EML4	Body	opensea
189	cg15881238	0.822915	0.255607	0.567308	1.35243e-11	1.78663e-09	SLC10A6	TSS1500	opensea
190	cg12243453	0.819427	0.252172	0.567255	1.64913e-11	2.11289e-09	HTR3B	TSS200	opensea
191	cg12249234	0.827643	0.260448	0.567194	7.00097e-09	3.89681e-07	KSR1	5'UTR	opensea
192	cg11362596	0.897837	0.330915	0.566922	3.27051e-13	7.36296e-11	MYH15	Body	opensea
193	cg00433709	0.902627	0.335812	0.566814	2.20499e-16	1.61201e-13	ZNRF1	Body	opensea
194	cg05647733	0.796608	0.229926	0.566682	2.43493e-10	2.13752e-08	NUAK1	Body	opensea
195	cg15335768	0.790691	0.225046	0.565645	6.60247e-08	2.65579e-06	DIRC3	Body	opensea
196	cg07866131	0.718278	0.15329	0.564988	4.64929e-07	1.39417e-05	TYRO3	TSS1500	shore
197	cg18404513	0.32449	0.889333	-0.564842	7.39037e-08	2.92077e-06	KIAA0146	Body	opensea
198	cg10106284	0.865525	0.300708	0.564817	1.26e-11	1.6792e-09	FAM49A	TSS1500	opensea
199	cg08151442	0.8251	0.260471	0.564629	5.89467e-11	6.29989e-09	LRRFIP1	Body	opensea
200	cg11309785	0.801084	0.236777	0.564307	3.83902e-08	1.66221e-06	EXOC6B	Body	opensea
201	cg25966295	0.304667	0.868971	-0.564304	2.44284e-06	5.67725e-05	C3orf21	Body	opensea
202	cg27468226	0.268676	0.832931	-0.564255	1.86769e-07	6.4426e-06	KIAA1715	Body	opensea
203	cg19307406	0.840156	0.276043	0.564113	3.50509e-11	4.02211e-09	ADCY10	5'UTR	opensea
204	cg01280609	0.653622	0.0895418	0.56408	2.19252e-06	5.17602e-05	BID	TSS200	shore
205	cg06486093	0.743795	0.180504	0.56329	2.22507e-09	1.453e-07	NKG7	TSS200	opensea
206	cg26396492	0.727682	0.164574	0.563108	8.82149e-06	0.000166611	RIN2	Body	opensea
207	cg02297709	0.688224	0.125157	0.563067	8.35674e-08	3.24331e-06	CASQ1	TSS1500	opensea
208	cg11201837	0.692728	0.1298	0.562929	2.41791e-07	7.99838e-06	PRG3	Body	opensea
209	cg17664577	0.731629	0.168732	0.562897	3.44996e-07	1.08168e-05	MMP9	Body	island
210	cg23712594	0.922561	0.359666	0.562895	3.7353e-19	1.30237e-15	PARP1	Body	shelf
211	cg23309670	0.845656	0.282917	0.56274	3.25332e-10	2.76204e-08	CPNE5	Body	opensea
212	cg01405445	0.680564	0.118039	0.562524	1.15372e-10	1.12541e-08	HSPB6	3'UTR	island
213	cg20506347	0.67439	0.111895	0.562494	3.7321e-07	1.15689e-05	FOXP1	5'UTR	opensea
214	cg23591609	0.891136	0.328648	0.562488	1.78247e-13	4.42569e-11	BEST3	5'UTR	opensea
215	cg08105396	0.785799	0.223571	0.562228	3.41339e-09	2.10214e-07	S100A2	TSS1500	opensea
216	cg05955436	0.83858	0.276461	0.562119	4.0216e-08	1.72964e-06	RRBP1	5'UTR	shore
217	cg13870520	0.707257	0.14525	0.562007	4.83035e-08	2.03059e-06	SCARB2	Body	shelf
218	cg11217865	0.814597	0.253177	0.56142	4.54043e-08	1.92239e-06	NRG2	3'UTR	shore
219	cg26226555	0.706127	0.144869	0.561258	9.65185e-08	3.66745e-06	SLC9A9	Body	opensea
220	cg17277939	0.923181	0.362239	0.560943	4.84354e-13	1.01639e-10	BEST3	1stExon	opensea
221	cg18754118	0.825898	0.265038	0.56086	8.11967e-12	1.15573e-09	GNG7	5'UTR	island
222	cg10462187	0.842301	0.28169	0.560612	3.81681e-11	4.32387e-09	BTBD16	Body	opensea
223	cg23030040	0.34367	0.904177	-0.560507	9.45593e-06	0.000176825	RGS12	Body	shore
224	cg11699334	0.824762	0.264697	0.560065	3.14954e-09	1.96218e-07	SSH1	Body	opensea
225	cg03161190	0.684546	0.124782	0.559765	6.87732e-06	0.000135291	C10orf26	TSS200	opensea
226	cg14538806	0.747216	0.187629	0.559587	2.91379e-09	1.83377e-07	FAM129B	Body	opensea
227	cg11935248	0.772111	0.212559	0.559552	4.93951e-07	1.46728e-05	CDYL	Body	opensea
228	cg12589798	0.20827	0.767742	-0.559472	2.30095e-07	7.67118e-06	CDH22	Body	shore
229	cg21746969	0.711227	0.151808	0.559419	2.8176e-08	1.27769e-06	LRTM2	1stExon	opensea
230	cg27408541	0.718662	0.15946	0.559203	9.32437e-06	0.000174716	TANC1	Body	opensea
231	cg02524983	0.740857	0.18167	0.559187	6.94527e-06	0.000136371	LPP	5'UTR	opensea
232	cg17691988	0.889112	0.330033	0.559079	3.51148e-12	5.55435e-10	PAPSS1	Body	opensea
233	cg12165685	0.7456	0.186659	0.558941	2.17947e-08	1.0275e-06	SLC1A5	1stExon	shelf
234	cg24595510	0.612607	0.0537739	0.558833	2.98308e-06	6.70588e-05	SCRT2	3'UTR	island
235	cg26232247	0.745961	0.18739	0.558571	5.3484e-06	0.000109733	RIN2	Body	opensea
236	cg26097573	0.673279	0.11483	0.558448	6.29325e-06	0.000125588	PRNT	TSS200	opensea
237	cg16853770	0.788528	0.230123	0.558405	2.19159e-06	5.17472e-05	VPS37B	Body	shelf
238	cg08169341	0.839014	0.280665	0.558349	2.9827e-08	1.34137e-06	KIAA0146	Body	opensea
239	cg23750206	0.799805	0.241502	0.558303	8.49975e-12	1.20038e-09	AFAP1	5'UTR	opensea
240	cg13914004	0.755367	0.197847	0.55752	1.28409e-08	6.51126e-07	ST6GALNAC6	Body	shore
241	cg08619954	0.705098	0.147796	0.557302	9.02498e-08	3.46214e-06	C4orf6	TSS200	opensea
242	cg21583016	0.873659	0.317035	0.556624	4.9845e-11	5.4514e-09	CAMTA1	Body	opensea
243	cg23998903	0.681285	0.124681	0.556603	1.05827e-06	2.79749e-05	C2orf80	Body	opensea
244	cg01771416	0.846202	0.289734	0.556469	7.10866e-09	3.94544e-07	NFKBIZ	5'UTR	shore
245	cg15580355	0.700826	0.144887	0.555939	4.38299e-06	9.27712e-05	MCF2L2	Body	opensea
246	cg03507593	0.688661	0.132816	0.555846	5.53132e-07	1.61544e-05	NCOR2	Body	shore
247	cg01247454	0.824638	0.269338	0.555301	4.56287e-07	1.37249e-05	COL5A2	Body	opensea
248	cg03200166	0.747363	0.19217	0.555193	9.92099e-11	9.85669e-09	SYT7	Body	island
249	cg15134506	0.807893	0.252949	0.554944	8.96756e-14	2.43719e-11	USP54	TSS1500	opensea
250	cg14939082	0.720535	0.165742	0.554792	2.61596e-06	6.01247e-05	C10orf26	5'UTR	opensea
251	cg09160231	0.804139	0.249463	0.554676	1.87636e-09	1.2497e-07	ELFN1	5'UTR	opensea
252	cg00625443	0.281729	0.83599	-0.55426	4.5857e-07	1.37814e-05	FAM108C1	Body	opensea
253	cg05667311	0.768211	0.214153	0.554058	3.92307e-08	1.69405e-06	SLIT1	Body	opensea
254	cg01297370	0.86698	0.312962	0.554018	1.37862e-10	1.31542e-08	COL4A3	TSS1500	shore
255	cg13286116	0.834562	0.280891	0.55367	6.3463e-07	1.81423e-05	ARNTL	5'UTR	shore
256	cg01082498	0.640468	0.0871605	0.553307	2.37273e-06	5.53767e-05	CPT1A	5'UTR	island
257	cg12289801	0.757813	0.204551	0.553263	1.3985e-09	9.66627e-08	SFRS14	Body	opensea
258	cg23214395	0.884941	0.331944	0.552997	1.45412e-12	2.60514e-10	RNF186	TSS200	opensea
259	cg26738614	0.657509	0.104626	0.552883	1.54191e-08	7.62431e-07	LRTM2	1stExon	opensea
260	cg18522626	0.359992	0.912674	-0.552682	1.31872e-06	3.36139e-05	PPM1A	TSS1500	opensea
261	cg05140806	0.735368	0.183399	0.551969	1.04316e-06	2.76363e-05	SHH	Body	island
262	cg24791666	0.708537	0.156613	0.551924	9.59767e-07	2.57363e-05	CSRNP1	5'UTR	shelf
263	cg24195486	0.696334	0.144727	0.551607	1.22735e-08	6.25935e-07	SLC24A4	TSS1500	shore
264	cg03281139	0.752562	0.20105	0.551512	1.65619e-06	4.08209e-05	NFIC	Body	shore
265	cg22900681	0.794799	0.243361	0.551438	4.09966e-07	1.25265e-05	EFR3B	Body	opensea
266	cg03805182	0.780672	0.229652	0.55102	1.51002e-07	5.37238e-06	ZFHX3	5'UTR	shelf
267	cg24788034	0.793245	0.242341	0.550904	3.30983e-10	2.80184e-08	GNG7	5'UTR	shore
268	cg12392104	0.720221	0.169441	0.550781	8.53991e-08	3.30559e-06	CCPG1	Body	opensea
269	cg26670562	0.820833	0.270143	0.55069	2.97701e-11	3.50184e-09	MAPK10	Body	opensea
270	cg17639959	0.764313	0.213672	0.550641	6.14916e-07	1.76703e-05	SFXN5	Body	shore
271	cg15586392	0.870456	0.320033	0.550423	2.98425e-11	3.50833e-09	SLC45A4	TSS200	shore
272	cg13081600	0.621249	0.0710022	0.550247	4.24338e-05	0.00062308	SHH	Body	island
273	cg27572510	0.891813	0.341685	0.550128	5.283e-14	1.53021e-11	ACACA	Body	opensea
274	cg20784259	0.886458	0.336724	0.549734	1.8842e-14	6.42136e-12	HIPK1	3'UTR	opensea
275	cg01636873	0.840898	0.291239	0.549659	1.29502e-11	1.71969e-09	CARKD	Body	shelf
276	cg10930289	0.302561	0.852109	-0.549548	1.74149e-07	6.06318e-06	LOC645323	Body	island
277	cg05098343	0.653178	0.103638	0.54954	1.83394e-06	4.44737e-05	ELMO1	Body	opensea
278	cg18145759	0.704792	0.155528	0.549265	1.78752e-07	6.20226e-06	SH3RF3	Body	opensea
279	cg04536856	0.774298	0.225109	0.549189	2.39788e-10	2.10862e-08	MRVI1	5'UTR	opensea
280	cg08677210	0.869258	0.32019	0.549067	2.4391e-17	2.72604e-14	MSI2	Body	opensea
281	cg26650383	0.858892	0.309858	0.549034	9.71539e-09	5.13379e-07	SLC46A3	Body	shelf
282	cg25772827	0.701871	0.152879	0.548992	4.69457e-07	1.40541e-05	C1orf94	TSS200	shore
283	cg08834989	0.880219	0.331261	0.548958	2.29453e-14	7.57305e-12	CNGA3	Body	opensea
284	cg04421915	0.355475	0.904342	-0.548867	3.00097e-06	6.7385e-05	SRGAP3	Body	opensea
285	cg18064411	0.308158	0.856734	-0.548576	6.97682e-08	2.7854e-06	FOXN2	5'UTR	shelf
286	cg16337566	0.807702	0.25928	0.548422	4.14815e-08	1.77639e-06	PINX1	Body	opensea
287	cg23522611	0.636701	0.0886701	0.548031	3.3757e-06	7.43286e-05	FOSL2	Body	shore
288	cg25428429	0.852527	0.304601	0.547926	7.69447e-09	4.21661e-07	KIAA0240	5'UTR	opensea
289	cg22592475	0.802821	0.254898	0.547923	2.33878e-08	1.09e-06	PIK3R1	Body	opensea
290	cg25150953	0.863676	0.315829	0.547847	2.50221e-15	1.17328e-12	LIMCH1	Body	opensea
291	cg03856949	0.656833	0.109271	0.547562	1.15455e-08	5.94377e-07	METTL7A	TSS1500	opensea
292	cg08521073	0.71747	0.1701	0.54737	5.65211e-08	2.32408e-06	HRK	3'UTR	shelf
293	cg14687145	0.785448	0.238564	0.546884	2.82239e-09	1.78478e-07	FAM179A	Body	opensea
294	cg03884082	0.63547	0.0888556	0.546614	4.33701e-07	1.31415e-05	NBL1	Body	island
295	cg25170091	0.737064	0.190581	0.546483	2.92676e-10	2.51567e-08	RPH3AL	TSS200	shelf
296	cg21775570	0.614513	0.0682673	0.546246	1.24508e-06	3.20721e-05	SKI	Body	opensea
297	cg23684410	0.761306	0.215214	0.546093	8.32254e-08	3.23188e-06	SIK3	Body	opensea
298	cg02915920	0.658759	0.112798	0.545961	3.93011e-07	1.20881e-05	ABL1	Body	shore
299	cg14316231	0.687236	0.141505	0.545731	6.53292e-06	0.000129534	MYST3	Body	opensea
300	cg02724472	0.681766	0.136384	0.545382	2.07978e-05	0.000342052	LRRC17	TSS200	opensea
301	cg04096619	0.88508	0.339758	0.545322	3.36949e-13	7.54003e-11	SNORD123	TSS1500	shore
302	cg19722814	0.683221	0.137969	0.545252	6.43578e-07	1.83582e-05	SERPINE1	TSS1500	opensea
303	cg09681300	0.840798	0.295621	0.545177	2.48498e-12	4.13932e-10	ZFHX3	Body	opensea
304	cg16943185	0.795789	0.250638	0.545151	7.81737e-08	3.06223e-06	AMOTL1	Body	shore
305	cg02767634	0.836292	0.291151	0.545142	1.49981e-06	3.75286e-05	RUFY1	3'UTR	opensea
306	cg26228280	0.923584	0.378669	0.544914	3.19702e-18	5.67039e-15	VPS13D	Body	opensea
307	cg06679087	0.650507	0.105646	0.544861	9.65187e-08	3.66745e-06	MARVELD1	TSS1500	island
308	cg21840806	0.842913	0.298055	0.544858	5.02465e-08	2.10144e-06	CREB5	Body	opensea
309	cg03727673	0.880365	0.335517	0.544848	2.76424e-10	2.39516e-08	RAP1GAP	Body	opensea
310	cg06271652	0.806294	0.261512	0.544783	2.21826e-11	2.72482e-09	USP31	Body	opensea
311	cg12435551	0.724271	0.179636	0.544635	7.16829e-07	2.01114e-05	SPAG17	Body	opensea
312	cg23169762	0.781948	0.237496	0.544451	5.82872e-11	6.24248e-09	C6orf145	Body	shore
313	cg03335624	0.614753	0.0703936	0.544359	2.95103e-07	9.46564e-06	ENC1	5'UTR	shore
314	cg20052079	0.730225	0.185875	0.54435	7.58357e-11	7.85984e-09	JARID2	Body	opensea
315	cg20345556	0.768684	0.224496	0.544187	2.8591e-07	9.20987e-06	TRIM26	5'UTR	opensea
316	cg04518342	0.672756	0.128581	0.544175	6.97364e-07	1.96493e-05	PDLIM4	TSS1500	island
317	cg08863830	0.800908	0.256769	0.544139	4.25836e-12	6.58011e-10	SKI	Body	opensea
318	cg23292965	0.876697	0.33267	0.544026	1.78922e-14	6.14906e-12	UNC5A	Body	opensea
319	cg10876003	0.84162	0.29776	0.54386	3.97264e-13	8.64318e-11	FLJ41941	TSS200	opensea
320	cg13126982	0.66321	0.119523	0.543687	3.55419e-06	7.77381e-05	MUC21	TSS1500	opensea
321	cg21766592	0.870727	0.327106	0.543621	1.88661e-09	1.2555e-07	SLC1A5	1stExon	shelf
322	cg14124646	0.253318	0.796807	-0.543489	2.51812e-06	5.82759e-05	HPS6	TSS1500	shore
323	cg22806907	0.644261	0.100988	0.543273	9.69634e-06	0.000180551	PLEKHH3	Body	shore
324	cg22778981	0.714452	0.1717	0.542752	5.18014e-08	2.15631e-06	ERBB2	5'UTR	shore
325	cg25788793	0.771179	0.228673	0.542506	6.29856e-10	4.8425e-08	SLC2A9	5'UTR	opensea
326	cg20567768	0.8396	0.29731	0.542289	2.27717e-10	2.02033e-08	PHYHIP	Body	shelf
327	cg11031567	0.818342	0.276091	0.542251	5.27493e-15	2.21156e-12	BAHCC1	Body	shore
328	cg07957294	0.308042	0.850278	-0.542237	2.6534e-05	0.00041917	PRRX1	Body	opensea
329	cg26339162	0.780962	0.238991	0.541971	8.2769e-13	1.60555e-10	RAD51L1	Body	opensea
330	cg01070272	0.799018	0.257063	0.541955	2.274e-09	1.47998e-07	PIP5K1C	Body	island
331	cg07417666	0.344778	0.886251	-0.541473	7.22471e-08	2.86752e-06	CRADD	Body	opensea
332	cg24252148	0.776613	0.235569	0.541043	9.51378e-11	9.53104e-09	LRP5	Body	shore
333	cg22602019	0.748103	0.207218	0.540885	2.1032e-08	9.96835e-07	FAM167B	3'UTR	shore
334	cg06780080	0.369972	0.910736	-0.540764	4.69444e-05	0.000678181	SCHIP1	TSS200	opensea
335	cg25061131	0.633876	0.0932706	0.540605	2.28694e-05	0.000370401	RELT	5'UTR	island
336	cg21546950	0.746221	0.205942	0.540279	6.3726e-07	1.82034e-05	AK5	Body	opensea
337	cg15585294	0.673606	0.133914	0.539692	5.09544e-07	1.50658e-05	GAS2	TSS1500	shore
338	cg03746015	0.81817	0.278583	0.539587	5.78595e-14	1.6552e-11	CLEC16A	Body	opensea
339	cg22274745	0.773494	0.233953	0.539541	1.14976e-06	2.99873e-05	CERKL	Body	opensea
340	cg06814616	0.694472	0.155558	0.538913	2.89658e-06	6.54314e-05	GALNTL6	3'UTR	opensea
341	cg13186559	0.736599	0.197991	0.538608	1.60533e-08	7.89009e-07	ZMIZ1	5'UTR	opensea
342	cg09035925	0.709495	0.170906	0.538589	2.25375e-05	0.000366015	RIN2	Body	opensea
343	cg15063687	0.69025	0.151788	0.538462	7.25833e-06	0.000141592	CAMTA1	Body	opensea
344	cg17080882	0.839558	0.301582	0.537976	1.08996e-07	4.06767e-06	TGFBR3	Body	opensea
345	cg09405083	0.610047	0.0721278	0.537919	3.14636e-06	7.01072e-05	C10orf26	5'UTR	opensea
346	cg05702161	0.350116	0.88773	-0.537614	3.90462e-07	1.20251e-05	DOCK1	Body	opensea
347	cg11679455	0.341159	0.878721	-0.537562	8.09255e-06	0.000155062	GATA3	Body	island
348	cg17058475	0.751137	0.21364	0.537497	3.83065e-07	1.1833e-05	CPT1A	5'UTR	shore
349	cg25814383	0.770064	0.232578	0.537486	7.24207e-08	2.87346e-06	NCAN	Body	shore
350	cg06670039	0.891452	0.354072	0.537381	6.00668e-10	4.65149e-08	SNX29	Body	opensea
351	cg16836311	0.794703	0.25766	0.537043	1.71576e-08	8.35531e-07	MAN1C1	1stExon	island
352	cg13927769	0.788609	0.251654	0.536955	2.3862e-08	1.10717e-06	COL15A1	Body	opensea
353	cg05940146	0.854506	0.317684	0.536822	3.01045e-15	1.36151e-12	FLVCR2	Body	opensea
354	cg20884605	0.705952	0.169164	0.536788	2.71301e-08	1.23811e-06	ALDH2	Body	shore
355	cg12060422	0.797385	0.260694	0.53669	4.15081e-11	4.64931e-09	KAZALD1	1stExon	island
356	cg16781264	0.799203	0.262833	0.53637	1.01759e-09	7.35365e-08	NMS	Body	opensea
357	cg25038082	0.835004	0.298886	0.536118	1.69683e-09	1.14717e-07	GRB7	5'UTR	opensea
358	cg16258854	0.842416	0.30642	0.535996	6.66152e-11	7.00385e-09	RHOB	1stExon	shore
359	cg00741333	0.272572	0.808335	-0.535763	4.46113e-09	2.63994e-07	C6orf108	TSS1500	shore
360	cg07069844	0.680688	0.144946	0.535742	1.33682e-08	6.73394e-07	TCF3	Body	shore
361	cg05901279	0.861271	0.325533	0.535738	5.52473e-09	3.17296e-07	PRICKLE1	5'UTR	shelf
362	cg26758131	0.841382	0.305848	0.535534	5.50744e-12	8.20862e-10	ARID5B	Body	opensea
363	cg12459718	0.606299	0.0711021	0.535196	1.34715e-06	3.42211e-05	C17orf68	3'UTR	shelf
364	cg08323277	0.760576	0.225602	0.534974	5.50259e-07	1.6082e-05	LAPTM4A	Body	shelf
365	cg05868813	0.871131	0.33626	0.534871	1.1521e-11	1.55368e-09	ATP8A2	3'UTR	opensea
366	cg02299328	0.727102	0.192348	0.534754	2.04099e-06	4.87386e-05	RAPGEFL1	Body	shore
367	cg17860158	0.727725	0.193066	0.534659	1.15156e-12	2.13239e-10	CNTN2	5'UTR	opensea
368	cg10119160	0.933586	0.398956	0.534631	8.28174e-15	3.2084e-12	MREG	Body	opensea
369	cg25065716	0.883474	0.349039	0.534435	3.17587e-13	7.1816e-11	ADARB2	Body	opensea
370	cg18512963	0.77792	0.243679	0.53424	7.64379e-07	2.12094e-05	CPNE4	Body	opensea
371	cg06835156	0.952136	0.418108	0.534028	3.68732e-17	3.79849e-14	C14orf70	Body	opensea
372	cg04682791	0.661371	0.127467	0.533904	5.24334e-08	2.17817e-06	LRRC16A	Body	opensea
373	cg18752412	0.877887	0.343993	0.533893	1.20914e-16	9.89686e-14	DACT3	Body	shelf
374	cg15592816	0.898003	0.364114	0.53389	1.55747e-10	1.4653e-08	UBIAD1	3'UTR	opensea
375	cg21451869	0.785437	0.251672	0.533765	3.16128e-09	1.96827e-07	MMP9	TSS1500	shelf
376	cg01043616	0.776248	0.242529	0.533719	3.18908e-10	2.71427e-08	ACCN2	Body	island
377	cg17066349	0.867354	0.333869	0.533486	1.03601e-15	5.68166e-13	CIT	Body	shelf
378	cg19308132	0.727584	0.194118	0.533466	5.54089e-08	2.28549e-06	NCALD	TSS1500	shore
379	cg08288130	0.309879	0.842704	-0.532824	1.44415e-05	0.00025128	DOK2	TSS1500	shore
380	cg09577228	0.272685	0.805498	-0.532813	2.77235e-07	8.97367e-06	GABRR2	TSS200	opensea
381	cg24575128	0.724258	0.191549	0.532709	9.29649e-07	2.50555e-05	NISCH	Body	opensea
382	cg09194815	0.375244	0.907883	-0.532639	4.76819e-06	9.95971e-05	PCCA	Body	opensea
383	cg24886710	0.896118	0.363504	0.532614	4.15641e-15	1.79996e-12	CHD5	Body	opensea
384	cg26620147	0.787729	0.255124	0.532605	2.8206e-09	1.78407e-07	AVIL	TSS1500	opensea
385	cg07486252	0.834281	0.301857	0.532425	7.4661e-09	4.1075e-07	ANK2	Body	opensea
386	cg01990910	0.933578	0.401336	0.532242	6.29428e-16	3.79556e-13	SNX29	Body	shelf
387	cg03301165	0.879683	0.347499	0.532184	4.06131e-13	8.79387e-11	C16orf62	3'UTR	opensea
388	cg07499899	0.813445	0.281326	0.532118	6.00886e-10	4.65221e-08	RAP1GAP	Body	opensea
389	cg13941235	0.758118	0.226171	0.531948	2.74991e-12	4.51244e-10	RXRA	Body	opensea
390	cg16047868	0.194375	0.72632	-0.531945	1.92646e-08	9.24888e-07	LRTOMT	5'UTR	shelf
391	cg23475474	0.814961	0.283137	0.531824	2.95303e-09	1.8536e-07	AXIN2	Body	opensea
392	cg23417096	0.760438	0.228675	0.531763	3.18725e-11	3.69902e-09	NDRG1	3'UTR	opensea
393	cg21780202	0.396196	0.927769	-0.531573	3.60734e-05	0.00054394	NFASC	5'UTR	shelf
394	cg01824172	0.832323	0.300972	0.531351	2.1867e-07	7.35825e-06	HIPK2	Body	shelf
395	cg23904595	0.842048	0.311166	0.530882	1.90177e-08	9.14542e-07	CDKN1C	TSS1500	shore
396	cg27276522	0.867429	0.336549	0.53088	3.57543e-09	2.18674e-07	DYRK2	Body	opensea
397	cg04173586	0.878885	0.348185	0.5307	1.1023e-10	1.0825e-08	DOT1L	Body	shore
398	cg01101380	0.722526	0.191969	0.530557	1.32666e-08	6.69184e-07	TFAP2E	5'UTR	island
399	cg00863378	0.759389	0.228859	0.530529	9.33903e-08	3.56482e-06	BBS2	Body	shelf
400	cg21213593	0.721634	0.191187	0.530447	2.73179e-06	6.2292e-05	ZNF608	Body	shelf
401	cg03687650	0.838097	0.307714	0.530383	1.22947e-09	8.6414e-08	OSBPL5	Body	shelf
402	cg19080053	0.71574	0.185432	0.530309	1.58043e-08	7.7874e-07	LYRM4	3'UTR	shelf
403	cg27262041	0.786751	0.256657	0.530094	6.44311e-09	3.62838e-07	NAV2	Body	opensea
404	cg16672562	0.875439	0.345388	0.530051	3.22169e-10	2.73949e-08	HIF3A	5'UTR	shore
405	cg08705647	0.915358	0.385353	0.530005	2.98627e-17	3.23994e-14	FSTL4	Body	opensea
406	cg24150385	0.813624	0.283675	0.529949	2.82425e-07	9.11364e-06	LRIG1	Body	opensea
407	cg09608765	0.758469	0.228587	0.529882	3.41892e-08	1.50956e-06	LIMD1	TSS200	shore
408	cg04898130	0.766221	0.236515	0.529706	4.77749e-07	1.42663e-05	TSPAN18	5'UTR	opensea
409	cg09621472	0.936584	0.406884	0.529699	2.18548e-19	8.95694e-16	NAA50	3'UTR	opensea
410	cg19935951	0.837669	0.308157	0.529512	9.78622e-10	7.10605e-08	LRBA	Body	opensea
411	cg06604289	0.700577	0.171197	0.52938	8.61424e-07	2.34664e-05	PRDM2	Body	opensea
412	cg07638935	0.742316	0.212948	0.529367	4.07978e-09	2.45003e-07	KAZALD1	1stExon	island
413	cg15279308	0.789052	0.259826	0.529226	6.46379e-08	2.60737e-06	CACNA1C	3'UTR	island
414	cg06484514	0.787538	0.258528	0.52901	4.61561e-11	5.09026e-09	COL18A1	TSS1500	shore
415	cg24960799	0.659073	0.130556	0.528517	4.49649e-06	9.47662e-05	FAM65B	5'UTR	shore
416	cg24325996	0.737303	0.208801	0.528502	1.39442e-06	3.5233e-05	CRABP1	TSS1500	shore
417	cg10961249	0.891919	0.363551	0.528368	4.90035e-12	7.44246e-10	PLCH2	3'UTR	shore
418	cg07249730	0.883894	0.355584	0.52831	9.76825e-12	1.34532e-09	MSI2	Body	opensea
419	cg03359362	0.802914	0.274776	0.528138	2.45764e-09	1.58099e-07	SLC1A5	TSS1500	shore
420	cg08188318	0.667407	0.13934	0.528067	5.23012e-07	1.54115e-05	ANKS1A	Body	opensea
421	cg18076842	0.89383	0.365805	0.528025	4.14661e-15	1.79953e-12	C11orf75	5'UTR	opensea
422	cg01623261	0.694954	0.166956	0.527998	4.07811e-11	4.57794e-09	BAHCC1	Body	island
423	cg18758433	0.836571	0.308779	0.527791	7.9822e-12	1.13815e-09	RPTOR	Body	opensea
424	cg02671171	0.939502	0.411762	0.52774	9.945e-16	5.54229e-13	RPH3AL	TSS1500	shelf
425	cg10732611	0.735152	0.20763	0.527522	1.53874e-06	3.83756e-05	STARD13	Body	opensea
426	cg09479286	0.859272	0.331757	0.527515	1.23165e-13	3.21868e-11	NOSTRIN	5'UTR	opensea
427	cg12520319	0.668936	0.141519	0.527417	2.60462e-06	5.99078e-05	CHSY1	Body	opensea
428	cg16604801	0.822201	0.294865	0.527336	3.44058e-10	2.89929e-08	RAP1GAP2	Body	opensea
429	cg15684702	0.892977	0.365652	0.527324	7.59294e-13	1.48988e-10	PTCH2	Body	opensea
430	cg00450784	0.15952	0.686691	-0.527171	2.12482e-06	5.04156e-05	RFX4	Body	shore
431	cg16204989	0.673692	0.146533	0.527159	3.22707e-06	7.16084e-05	NALCN	Body	opensea
432	cg05569328	0.722104	0.195017	0.527087	1.64539e-08	8.06271e-07	TNXB	Body	shelf
433	cg16267979	0.352047	0.878983	-0.526936	8.91716e-06	0.000168169	GATA3	Body	shore
434	cg13822849	0.880987	0.354107	0.526881	2.85895e-12	4.65022e-10	OLFM1	Body	shelf
435	cg22796265	0.378716	0.905261	-0.526544	2.02627e-06	4.8438e-05	OSBPL3	5'UTR	opensea
436	cg04001359	0.879348	0.353218	0.526131	6.91723e-13	1.37381e-10	FBXL7	Body	opensea
437	cg03270167	0.72153	0.195554	0.525976	3.99449e-06	8.57946e-05	RAMP1	Body	shore
438	cg04071779	0.650825	0.124968	0.525857	7.17736e-07	2.01297e-05	NOD1	5'UTR	shore
439	cg03106056	0.69909	0.173254	0.525836	8.45334e-07	2.30912e-05	MARCH4	TSS1500	shore
440	cg13553936	0.881838	0.356011	0.525827	5.01949e-09	2.91935e-07	TMCO3	Body	shore
441	cg01833057	0.694043	0.168409	0.525635	4.06636e-06	8.71416e-05	AFAP1	5'UTR	opensea
442	cg14277403	0.835834	0.310287	0.525547	1.85153e-06	4.48442e-05	ANP32B	Body	shore
443	cg14691388	0.394566	0.919832	-0.525266	4.24465e-05	0.000623192	KCNK9	Body	shelf
444	cg07387634	0.717391	0.1923	0.525091	2.35056e-07	7.81131e-06	F3	Body	shore
445	cg07752095	0.729836	0.204751	0.525085	1.30142e-06	3.32665e-05	INTU	Body	opensea
446	cg17153138	0.693968	0.168938	0.525029	1.76657e-06	4.30622e-05	ARHGAP18	Body	opensea
447	cg01627483	0.592906	0.0679106	0.524995	2.41663e-05	0.000387819	MTMR9L	TSS1500	shore
448	cg21209876	0.873587	0.348829	0.524758	6.77787e-13	1.35338e-10	JUB	Body	shelf
449	cg11647481	0.937444	0.412721	0.524723	6.47016e-16	3.88723e-13	FOXK1	Body	shelf
450	cg07983363	0.784418	0.259789	0.524629	1.61188e-11	2.07494e-09	PCSK6	Body	opensea
451	cg13860281	0.766379	0.241796	0.524584	2.16203e-05	0.000353469	VOPP1	Body	shore
452	cg02751731	0.884088	0.359544	0.524544	1.65599e-12	2.91559e-10	SCRT2	3'UTR	shore
453	cg23956648	0.918761	0.394281	0.52448	8.1045e-14	2.22336e-11	IGF2BP2	Body	opensea
454	cg16476235	0.3237	0.848157	-0.524456	8.93584e-06	0.000168459	DOK2	TSS1500	shore
455	cg24511404	0.735674	0.211218	0.524455	5.56094e-07	1.62293e-05	NENF	Body	shore
456	cg15942979	0.260063	0.784502	-0.524439	2.20809e-06	5.20764e-05	BIN3	Body	opensea
457	cg22514229	0.852702	0.32831	0.524392	3.46553e-13	7.71684e-11	BCAR3	Body	opensea
458	cg23818246	0.407082	0.931468	-0.524386	2.42187e-06	5.63688e-05	ZNF521	Body	opensea
459	cg10762199	0.908706	0.384491	0.524215	4.44677e-18	7.25604e-15	PRKCH	Body	opensea
460	cg24691332	0.876053	0.351869	0.524184	1.04511e-14	3.93305e-12	PARD3	Body	opensea
461	cg00568550	0.761814	0.237749	0.524065	1.31788e-06	3.35968e-05	NFIA	Body	opensea
462	cg06756211	0.624946	0.100922	0.524023	1.25123e-07	4.57987e-06	CAPN2	Body	island
463	cg19673484	0.877682	0.35425	0.523432	2.4855e-13	5.86088e-11	NAV2	Body	opensea
464	cg12918895	0.578035	0.0548951	0.52314	3.90421e-06	8.41753e-05	DOK7	TSS200	island
465	cg17060157	0.794672	0.271569	0.523102	3.93171e-10	3.24939e-08	RPTOR	Body	shelf
466	cg12139725	0.680375	0.15787	0.522504	2.54526e-07	8.3553e-06	EPHA10	Body	island
467	cg04200243	0.544831	0.0223292	0.522502	2.03025e-06	4.85133e-05	SLCO3A1	Body	opensea
468	cg05368740	0.742839	0.220433	0.522406	1.08411e-08	5.64166e-07	HSPB6	Body	island
469	cg01329577	0.681644	0.159534	0.52211	1.03029e-07	3.87871e-06	PTPRN2	Body	shelf
470	cg17715641	0.776531	0.254504	0.522028	1.6122e-10	1.50913e-08	PHLDB3	Body	shelf
471	cg12776287	0.824236	0.302256	0.52198	5.89291e-08	2.4078e-06	KCTD1	5'UTR	shore
472	cg03173502	0.708609	0.186672	0.521937	6.60629e-06	0.000130768	JARID2	Body	opensea
473	cg21921016	0.905923	0.384006	0.521916	1.40781e-11	1.8496e-09	SLC20A2	5'UTR	opensea
474	cg10502303	0.658063	0.13653	0.521533	3.12556e-07	9.94259e-06	FAM49A	TSS1500	opensea
475	cg08532914	0.937095	0.415657	0.521438	7.95438e-16	4.59618e-13	VGLL4	TSS1500	shore
476	cg20944379	0.807244	0.286134	0.52111	2.24451e-14	7.42599e-12	IL24	TSS1500	opensea
477	cg13027183	0.742789	0.221831	0.520958	7.39191e-11	7.68267e-09	JARID2	Body	opensea
478	cg24528602	0.818407	0.297472	0.520935	2.74062e-08	1.24875e-06	SPTBN1	Body	opensea
479	cg01118078	0.683294	0.162368	0.520926	9.68859e-06	0.00018044	TP53INP2	Body	island
480	cg22377064	0.277759	0.798683	-0.520925	1.54741e-08	7.64782e-07	GPR133	Body	opensea
481	cg02794451	0.793802	0.273147	0.520655	9.2566e-07	2.49562e-05	CACNA1C	3'UTR	island
482	cg17329648	0.771861	0.251269	0.520591	2.26474e-06	5.32034e-05	SFXN5	Body	shore
483	cg21550372	0.844371	0.323787	0.520584	1.19472e-09	8.43059e-08	WDR25	Body	opensea
484	cg02286549	0.607672	0.0874047	0.520267	1.47621e-06	3.70337e-05	TFEB	5'UTR	shore
485	cg19508622	0.706882	0.186682	0.520201	8.59535e-10	6.35214e-08	PVT1	Body	opensea
486	cg10184289	0.883607	0.363639	0.519968	5.34364e-11	5.78832e-09	SERTAD2	5'UTR	opensea
487	cg00178728	0.863573	0.344002	0.519571	1.97086e-11	2.45794e-09	GPR125	Body	shore
488	cg23199907	0.796715	0.27717	0.519545	2.04974e-06	4.8913e-05	PDS5B	Body	opensea
489	cg08900316	0.874149	0.354715	0.519434	2.36636e-08	1.10059e-06	PRKCE	Body	opensea
490	cg00073794	0.90699	0.387614	0.519376	1.0158e-16	8.65101e-14	ALK	Body	opensea
491	cg07708487	0.708325	0.189154	0.519171	7.67478e-08	3.01499e-06	ANKRD11	5'UTR	opensea
492	cg18250838	0.665614	0.146448	0.519166	3.70151e-07	1.14924e-05	CRABP1	TSS1500	shore
493	cg17285883	0.798958	0.279828	0.51913	1.04016e-07	3.90827e-06	ARHGEF10L	5'UTR	opensea
494	cg24094897	0.74631	0.227221	0.519089	7.18515e-08	2.85349e-06	MCC	Body	opensea
495	cg03825158	0.943643	0.424613	0.519031	1.79261e-16	1.34922e-13	ZNF423	Body	opensea
496	cg01081737	0.888922	0.370097	0.518825	1.1558e-11	1.55747e-09	SLC45A4	TSS200	shore
497	cg01893100	0.235974	0.754711	-0.518737	2.38512e-06	5.56212e-05	GOLIM4	Body	opensea
498	cg25237365	0.563327	0.0446049	0.518722	1.34111e-05	0.000236274	DOK7	TSS200	island
499	cg20025238	0.655328	0.1369	0.518428	3.64937e-07	1.13547e-05	SMO	Body	shore
500	cg11006453	0.781511	0.263093	0.518418	1.67891e-08	8.20917e-07	EIF2C2	Body	opensea
501	cg15287806	0.763938	0.245812	0.518125	1.37147e-07	4.94543e-06	ZMYND11	Body	opensea
502	cg27116253	0.656284	0.138485	0.517799	7.21678e-07	2.02254e-05	FBXL16	Body	shore
503	cg14282004	0.784347	0.266602	0.517745	1.98105e-07	6.77338e-06	SIX5	Body	island
504	cg16597406	0.634434	0.117039	0.517395	9.11962e-07	2.46325e-05	C17orf68	3'UTR	shelf
505	cg24127874	0.621552	0.104283	0.517268	2.09783e-05	0.000344533	HES6	TSS1500	island
506	cg20155875	0.80243	0.285198	0.517232	4.62374e-07	1.38773e-05	WIPI1	Body	shore
507	cg11755201	0.721314	0.204204	0.517111	5.57095e-08	2.29533e-06	CAMTA1	Body	opensea
508	cg17296078	0.723844	0.206801	0.517043	2.13834e-07	7.22293e-06	MMS19	TSS1500	shore
509	cg24067652	0.814165	0.297161	0.517003	9.34551e-07	2.51727e-05	PFDN1	Body	opensea
510	cg22581200	0.82311	0.306208	0.516902	1.34977e-06	3.42769e-05	ANXA2	Body	opensea
511	cg07519235	0.597053	0.0802298	0.516823	9.24605e-06	0.000173425	GPRC5B	5'UTR	island
512	cg17745234	0.831657	0.314856	0.516801	6.79562e-14	1.90398e-11	TMPRSS6	1stExon	opensea
513	cg16597993	0.885901	0.369107	0.516794	1.0495e-08	5.49241e-07	EPS15L1	Body	shelf
514	cg16826777	0.790822	0.27416	0.516663	1.06821e-06	2.8181e-05	MAP3K14	5'UTR	opensea
515	cg20891481	0.746021	0.229688	0.516333	4.54746e-10	3.68731e-08	FOXP1	Body	shore
516	cg04779720	0.642783	0.126523	0.51626	1.22047e-05	0.000218683	NPPB	TSS1500	island
517	cg22070156	0.857472	0.341407	0.516065	2.81034e-12	4.5913e-10	ITGBL1	1stExon	shore
518	cg18522655	0.714105	0.198174	0.515931	1.02854e-05	0.000189719	HRNBP3	5'UTR	shore
519	cg13802583	0.888531	0.372691	0.515839	6.42351e-11	6.78202e-09	RIMBP2	Body	opensea
520	cg03580236	0.388826	0.90461	-0.515785	2.52539e-05	0.000402329	FAT1	Body	opensea
521	cg04206484	0.730303	0.21455	0.515753	1.35537e-05	0.000238445	C7orf50	Body	shore
522	cg07357827	0.754985	0.239249	0.515736	1.69576e-10	1.56863e-08	SYN2	Body	shore
523	cg14414903	0.818457	0.302801	0.515655	2.19402e-14	7.30037e-12	HDAC4	Body	opensea
524	cg09765297	0.227329	0.742307	-0.514978	2.66933e-08	1.22022e-06	CDH13	Body	opensea
525	cg08788712	0.768966	0.254127	0.51484	2.93633e-07	9.4222e-06	MSI2	Body	opensea
526	cg10376731	0.410244	0.924994	-0.514749	0.00015988	0.00189174	BTRC	TSS1500	shore
527	cg05315321	0.782823	0.268186	0.514638	3.2653e-08	1.45198e-06	RAD51L1	Body	opensea
528	cg16692439	0.340662	0.855115	-0.514453	6.39222e-05	0.000879128	ASPHD2	Body	shore
529	cg02012974	0.815913	0.301696	0.514217	1.53153e-08	7.58035e-07	LRIG1	Body	opensea
530	cg14530290	0.742115	0.227908	0.514207	7.00181e-08	2.79182e-06	ZMIZ1	5'UTR	opensea
531	cg06285475	0.915988	0.401843	0.514144	8.29559e-12	1.17626e-09	ASCC1	Body	opensea
532	cg13654836	0.837647	0.323545	0.514102	4.67005e-10	3.77247e-08	MSI2	Body	opensea
533	cg01507342	0.649187	0.135141	0.514047	2.05619e-07	6.98767e-06	PITPNC1	Body	opensea
534	cg04188351	0.751115	0.23708	0.514035	2.9582e-07	9.48342e-06	CD59	5'UTR	opensea
535	cg16799926	0.31884	0.83275	-0.51391	4.17884e-06	8.91911e-05	SLC8A3	Body	opensea
536	cg21123417	0.761438	0.247702	0.513736	6.51992e-08	2.62664e-06	SLC12A7	Body	shelf
537	cg13331691	0.866311	0.35288	0.51343	1.13042e-10	1.10745e-08	SMAD3	Body	opensea
538	cg03172098	0.2884	0.801827	-0.513427	4.54573e-07	1.36834e-05	LTBP1	Body	opensea
539	cg14748380	0.86543	0.35202	0.51341	2.94546e-12	4.76245e-10	FAM163A	5'UTR	island
540	cg10784813	0.748889	0.235672	0.513218	2.84204e-09	1.79554e-07	SOCS1	3'UTR	island
541	cg05230392	0.778688	0.265478	0.51321	2.25332e-08	1.05608e-06	CUEDC1	5'UTR	opensea
542	cg24161018	0.902645	0.389535	0.51311	2.14734e-13	5.1772e-11	PLXNA4	Body	opensea
543	cg19095568	0.859139	0.346118	0.513021	7.01302e-08	2.7952e-06	DNAJC17	Body	opensea
544	cg13938098	0.82703	0.314409	0.512621	4.90861e-11	5.37416e-09	LAMA4	TSS200	shore
545	cg17486314	0.828657	0.31642	0.512237	9.74209e-08	3.69657e-06	BACH2	5'UTR	opensea
546	cg12689670	0.822693	0.310813	0.51188	2.97317e-06	6.68654e-05	LAMC1	Body	opensea
547	cg02829456	0.598775	0.0872544	0.511521	1.52018e-06	3.79685e-05	CFLAR	5'UTR	shore
548	cg06524039	0.599642	0.0881859	0.511456	3.36785e-06	7.41915e-05	BRI3	Body	shore
549	cg09395844	0.415895	0.927206	-0.511311	7.68379e-05	0.00102342	LDLRAD3	Body	opensea
550	cg21858516	0.778554	0.267352	0.511202	2.61425e-07	8.54737e-06	DACT1	TSS1500	shore
551	cg26062560	0.788425	0.277275	0.51115	3.07319e-13	6.99151e-11	C3orf21	Body	shore
552	cg09379340	0.615512	0.104383	0.511129	3.16617e-07	1.00538e-05	TIAM2	Body	opensea
553	cg13446689	0.634752	0.123731	0.51102	3.56498e-05	0.000538527	DNM3	Body	opensea
554	cg16810293	0.764959	0.254254	0.510705	2.46363e-08	1.13805e-06	TM4SF1	TSS200	opensea
555	cg21461300	0.642044	0.131557	0.510487	2.55592e-06	5.90006e-05	RASA3	Body	opensea
556	cg13411286	0.859175	0.348697	0.510477	7.83594e-10	5.8696e-08	MFSD6	3'UTR	opensea
557	cg14238838	0.406708	0.91693	-0.510222	1.51035e-06	3.77692e-05	LHFP	Body	opensea
558	cg06657409	0.820492	0.31067	0.509822	2.36441e-10	2.08368e-08	SLC22A6	5'UTR	opensea
559	cg08503681	0.689737	0.180018	0.509718	5.59481e-08	2.304e-06	GPR151	TSS1500	opensea
560	cg04225551	0.750929	0.241225	0.509705	1.23934e-08	6.31496e-07	GRHL2	Body	opensea
561	cg13104185	0.714907	0.205318	0.50959	1.23379e-06	3.18391e-05	RERE	Body	opensea
562	cg02737268	0.773461	0.263977	0.509484	5.6002e-08	2.30552e-06	CDC25B	Body	shelf
563	cg07990556	0.782336	0.273013	0.509323	3.06518e-11	3.58586e-09	FNIP2	Body	opensea
564	cg05130679	0.596535	0.0872399	0.509295	6.02637e-05	0.000835761	AMOTL1	Body	shore
565	cg14136168	0.872917	0.363649	0.509268	3.73841e-16	2.45579e-13	QSOX2	Body	shore
566	cg08604097	0.705811	0.196605	0.509206	1.92731e-05	0.00032083	NXPH1	Body	shore
567	cg13947167	0.676651	0.168006	0.508645	9.7726e-05	0.00125192	CNTFR	Body	opensea
568	cg10162659	0.784554	0.275913	0.508641	5.12789e-10	4.07454e-08	ZFHX3	5'UTR	opensea
569	cg06875985	0.850735	0.342211	0.508524	9.29241e-13	1.76477e-10	RGS16	Body	shore
570	cg23936766	0.837762	0.329251	0.508511	3.35973e-13	7.53058e-11	GALNT2	Body	opensea
571	cg08194377	0.751995	0.2436	0.508395	1.23628e-08	6.30251e-07	ANKS1A	Body	opensea
572	cg01346501	0.571648	0.0633033	0.508345	1.16179e-05	0.000209939	NR1D1	Body	shore
573	cg20559405	0.723233	0.214924	0.508309	8.98893e-07	2.43282e-05	PTPRG	Body	opensea
574	cg01363198	0.872314	0.364062	0.508252	8.42595e-11	8.61688e-09	EPHB1	Body	opensea
575	cg13952483	0.713943	0.205958	0.507986	7.84204e-07	2.16637e-05	DISP1	1stExon	opensea
576	cg01558110	0.842753	0.334824	0.507929	1.10753e-12	2.06586e-10	PANX2	TSS1500	shore
577	cg06963109	0.724202	0.216277	0.507925	1.47954e-08	7.35911e-07	SYT7	Body	shore
578	cg09760574	0.881232	0.373563	0.50767	1.50584e-13	3.82022e-11	C20orf152	Body	opensea
579	cg25323057	0.696777	0.189214	0.507563	1.08695e-07	4.06017e-06	C10orf116	3'UTR	shore
580	cg08424966	0.866345	0.358882	0.507464	2.51418e-09	1.61415e-07	PTPRN2	Body	shore
581	cg03655701	0.662002	0.154751	0.507251	1.49544e-05	0.000258967	C1orf130	5'UTR	opensea
582	cg13285698	0.9105	0.403293	0.507207	6.1472e-15	2.52028e-12	TRAPPC9	Body	opensea
583	cg26094842	0.901524	0.394667	0.506857	3.48516e-13	7.73943e-11	VTI1A	Body	opensea
584	cg08287903	0.319378	0.8262	-0.506822	7.78074e-05	0.0010341	UGT8	5'UTR	shelf
585	cg05629821	0.879835	0.373163	0.506672	4.52737e-11	5.00919e-09	ATP11A	Body	shelf
586	cg02027735	0.773516	0.266896	0.506619	5.2334e-07	1.54172e-05	C20orf95	Body	shelf
587	cg13466988	0.817313	0.310861	0.506452	1.75659e-06	4.28757e-05	VPS13D	Body	opensea
588	cg14426167	0.819631	0.313249	0.506383	1.09667e-10	1.07726e-08	SSH2	Body	opensea
589	cg20294319	0.772443	0.266099	0.506344	5.96268e-09	3.39124e-07	LRCH1	Body	opensea
590	cg20319604	0.900053	0.393737	0.506316	1.1423e-10	1.11694e-08	PPM1B	Body	opensea
591	cg20229025	0.893257	0.386953	0.506304	5.20367e-14	1.51386e-11	AP2A2	Body	shelf
592	cg12189835	0.670105	0.164003	0.506102	4.17156e-07	1.27128e-05	SYT7	Body	shore
593	cg14523238	0.751276	0.245237	0.506039	4.64381e-08	1.96107e-06	GABBR2	Body	opensea
594	cg08473858	0.762745	0.256816	0.505929	4.14951e-09	2.48604e-07	PHLDB1	TSS1500	shore
595	cg02484562	0.369359	0.87523	-0.50587	7.70162e-07	2.13408e-05	TBC1D2B	Body	opensea
596	cg00260116	0.652579	0.14715	0.505429	0.000121218	0.00150107	C7orf52	3'UTR	shore
597	cg15442907	0.756622	0.251196	0.505426	3.33852e-08	1.47922e-06	CACNA1C	3'UTR	island
598	cg25124956	0.274991	0.78038	-0.505389	5.95014e-07	1.71819e-05	FAT1	3'UTR	opensea
599	cg02231066	0.636962	0.131766	0.505196	2.3174e-08	1.0814e-06	NT5DC2	Body	island
600	cg06851000	0.701694	0.196823	0.504871	5.25837e-08	2.18397e-06	TRIM62	Body	shore
601	cg27110054	0.828166	0.323316	0.50485	1.03748e-08	5.43649e-07	NCALD	TSS1500	shore
602	cg15294851	0.768459	0.263612	0.504847	1.90938e-08	9.17661e-07	DYSF	TSS1500	shore
603	cg22586405	0.735663	0.230854	0.504808	5.31504e-10	4.19789e-08	CDH22	Body	opensea
604	cg12741645	0.64379	0.139016	0.504773	1.46649e-06	3.68125e-05	AEN	5'UTR	shelf
605	cg09844687	0.310667	0.815208	-0.504541	2.53508e-07	8.32626e-06	ADAR	5'UTR	shelf
606	cg13060114	0.548923	0.0444815	0.504441	4.3766e-06	9.26607e-05	TFAP2E	TSS200	island
607	cg26460483	0.679385	0.175041	0.504345	3.94946e-07	1.21421e-05	BRI3	Body	shelf
608	cg03103888	0.597101	0.0929295	0.504172	1.73384e-05	0.000293365	TMCO3	5'UTR	shore
609	cg05651778	0.582653	0.0785535	0.5041	5.78933e-06	0.000117031	MRC2	Body	island
610	cg14398691	0.747462	0.243527	0.503934	2.1794e-08	1.0275e-06	GRB7	5'UTR	opensea
611	cg03920522	0.949392	0.445698	0.503694	1.00455e-18	2.6269e-15	COL1A2	Body	opensea
612	cg23769143	0.711154	0.207494	0.50366	7.14827e-09	3.96365e-07	SYN2	Body	shore
613	cg13265524	0.773656	0.270099	0.503557	3.57309e-10	2.99057e-08	ALS2CR11	TSS1500	shore
614	cg00113050	0.707652	0.204096	0.503556	1.80758e-07	6.25962e-06	LZTS2	TSS1500	shore
615	cg03226666	0.766321	0.262837	0.503484	7.13099e-08	2.83612e-06	NKAIN2	Body	opensea
616	cg02717046	0.630344	0.126861	0.503483	0.000347238	0.00361588	GPR133	5'UTR	opensea
617	cg08705406	0.786813	0.283576	0.503237	1.13865e-08	5.87605e-07	ZFPM1	Body	shore
618	cg09499849	0.575297	0.072242	0.503055	7.50808e-05	0.00100391	ACVR1	5'UTR	opensea
619	cg25814096	0.779871	0.276945	0.502926	5.50984e-08	2.27429e-06	UNK	Body	shore
620	cg17881203	0.303133	0.805973	-0.50284	2.54187e-06	5.87294e-05	WDR18	Body	island
621	cg20097219	0.808313	0.305767	0.502546	7.76857e-07	2.14956e-05	TBC1D16	Body	shore
622	cg03781098	0.654934	0.152598	0.502336	2.78316e-05	0.000436493	GDF3	1stExon	opensea
623	cg11511777	0.788718	0.286647	0.50207	5.33863e-10	4.21326e-08	WNT6	Body	shore
624	cg11252310	0.867909	0.366276	0.501633	1.16582e-12	2.15196e-10	KIRREL3	Body	opensea
625	cg16971128	0.868906	0.367498	0.501407	4.55882e-13	9.6627e-11	TMPRSS6	TSS200	opensea
626	cg25149218	0.728248	0.227133	0.501116	3.07644e-06	6.882e-05	PARD3B	Body	shore
627	cg27493411	0.89129	0.390207	0.501083	1.12729e-12	2.09697e-10	CUX1	Body	shelf
628	cg04556393	0.33221	0.833196	-0.500985	5.3947e-05	0.000761661	ADCY10	Body	opensea
629	cg19920006	0.250284	0.751263	-0.50098	1.06708e-07	3.99765e-06	PPP1R1C	Body	opensea
630	cg02999146	0.687425	0.186463	0.500962	7.68078e-10	5.77216e-08	COL20A1	Body	shore
631	cg05734675	0.62834	0.127428	0.500912	3.23345e-06	7.17109e-05	DIP2C	Body	opensea
632	cg22193912	0.676194	0.175402	0.500791	2.24479e-06	5.27895e-05	MAFG	5'UTR	shore
633	cg01415937	0.719973	0.219297	0.500676	6.7692e-06	0.000133461	UBE4B	Body	opensea
634	cg04075973	0.572705	0.0720617	0.500643	2.18927e-08	1.0314e-06	BCL9L	1stExon	island
635	cg21199093	0.742066	0.241678	0.500388	1.49318e-09	1.02364e-07	ZMYM4	Body	opensea
636	cg07621169	0.8137	0.313573	0.500127	1.32556e-09	9.21992e-08	TKT	Body	opensea
637	cg00041599	0.778201	0.278248	0.499952	1.66944e-08	8.17073e-07	UNC5A	Body	shore
638	cg01628067	0.672075	0.172193	0.499882	4.37357e-07	1.32395e-05	SKI	Body	island
639	cg18533883	0.791623	0.291753	0.499869	7.18401e-07	2.01432e-05	NPPB	TSS1500	island
640	cg02916899	0.757264	0.257474	0.49979	3.33236e-07	1.0512e-05	SEMA4B	Body	opensea
641	cg02256576	0.742996	0.243228	0.499768	6.57834e-08	2.64778e-06	CES3	1stExon	opensea
642	cg20938802	0.768992	0.269663	0.499329	3.33001e-06	7.35406e-05	GPR98	Body	shelf
643	cg11352146	0.625307	0.125996	0.499311	1.19004e-06	3.09036e-05	NEAT1	Body	shore
644	cg24759795	0.657084	0.157892	0.499192	6.95565e-05	0.000941842	CSMD3	Body	shore
645	cg03613618	0.791151	0.292008	0.499144	1.9859e-09	1.31341e-07	PGCP	5'UTR	shore
646	cg11752100	0.672746	0.173845	0.4989	9.02714e-06	0.000169938	POU6F2	Body	opensea
647	cg02566978	0.619827	0.120928	0.498899	1.95021e-05	0.000324082	CSK	5'UTR	shore
648	cg15195541	0.417255	0.915924	-0.498668	3.99559e-06	8.58098e-05	CSMD1	Body	opensea
649	cg14199187	0.79767	0.299105	0.498566	1.79199e-10	1.64348e-08	SIGLEC1	3'UTR	opensea
650	cg26877508	0.892656	0.394096	0.49856	1.65525e-14	5.80372e-12	THSD4	Body	opensea
651	cg26468430	0.584053	0.0855046	0.498549	9.99458e-05	0.00127587	MAFK	5'UTR	shore
652	cg17510121	0.73584	0.237301	0.498539	9.53764e-06	0.000178119	SCUBE3	Body	shore
653	cg26437697	0.754684	0.256196	0.498487	6.26686e-08	2.53928e-06	SAMD4A	Body	opensea
654	cg18935453	0.752962	0.254536	0.498426	1.20671e-09	8.50516e-08	LRP5	Body	opensea
655	cg09420520	0.836177	0.338028	0.498149	8.08008e-08	3.14912e-06	PRMT8	Body	opensea
656	cg20614854	0.892823	0.394912	0.497911	3.57865e-14	1.10596e-11	SDK2	3'UTR	opensea
657	cg24892069	0.585644	0.0879114	0.497733	6.46112e-06	0.000128297	NRP1	Body	opensea
658	cg06242243	0.730818	0.233212	0.497606	3.37257e-09	2.08024e-07	NCOR2	5'UTR	opensea
659	cg12105089	0.844027	0.346429	0.497599	1.13502e-09	8.06515e-08	C7orf50	Body	shore
660	cg12500956	0.836133	0.338596	0.497537	2.15671e-07	7.27172e-06	TMEM163	Body	opensea
661	cg11808936	0.658678	0.161223	0.497455	6.64833e-06	0.000131471	AFAP1	5'UTR	opensea
662	cg02740861	0.852862	0.35542	0.497442	1.49919e-09	1.02735e-07	HYDIN	Body	opensea
663	cg15474318	0.686661	0.189251	0.49741	2.43208e-06	5.65806e-05	RASA3	Body	opensea
664	cg00537210	0.821024	0.323731	0.497292	1.27566e-09	8.91689e-08	KLHL29	Body	shore
665	cg00704780	0.826272	0.329014	0.497258	9.16943e-09	4.88452e-07	HDLBP	5'UTR	shelf
666	cg25898092	0.754876	0.257712	0.497164	1.55362e-07	5.50252e-06	TMEM233	Body	shore
667	cg25630514	0.297053	0.794112	-0.497059	4.25904e-05	0.000624975	GATA3	Body	shelf
668	cg25338134	0.748262	0.251403	0.496859	1.20838e-05	0.000216861	GXYLT2	Body	opensea
669	cg12870518	0.915748	0.419204	0.496544	2.67229e-18	5.12336e-15	FLJ41941	TSS200	opensea
670	cg22367549	0.684	0.187612	0.496388	2.34563e-08	1.09246e-06	ATP2B4	5'UTR	opensea
671	cg03466717	0.923485	0.427258	0.496227	3.80738e-16	2.48112e-13	ZNF423	Body	opensea
672	cg09284949	0.805237	0.309039	0.496198	2.00377e-07	6.83457e-06	SHANK1	Body	shore
673	cg02564299	0.865875	0.36988	0.495995	3.11268e-09	1.94127e-07	ZBTB20	5'UTR	opensea
674	cg04255044	0.893801	0.397826	0.495975	1.17315e-13	3.07566e-11	FBXO31	Body	shore
675	cg04794662	0.788697	0.292767	0.49593	1.40301e-07	5.03689e-06	FOXP1	Body	opensea
676	cg03916038	0.685106	0.189266	0.49584	6.891e-06	0.000135498	C3orf21	Body	opensea
677	cg23827488	0.707337	0.211794	0.495543	1.40353e-06	3.5437e-05	FAM65B	5'UTR	shelf
678	cg20852226	0.738401	0.242977	0.495424	1.34713e-07	4.87312e-06	MYO7A	Body	island
679	cg09459339	0.838242	0.342977	0.495265	1.76054e-07	6.11904e-06	CD96	TSS200	opensea
680	cg12938814	0.432462	0.927672	-0.495211	2.84654e-06	6.44726e-05	CNOT8	Body	opensea
681	cg24933651	0.407943	0.902967	-0.495024	4.73433e-06	9.89962e-05	ROBO2	TSS200	shore
682	cg09364688	0.627912	0.132944	0.494968	2.25606e-06	5.303e-05	TFAP2E	TSS200	shore
683	cg20445053	0.820183	0.325236	0.494947	1.01475e-06	2.70029e-05	LASS6	Body	opensea
684	cg06294954	0.932385	0.437596	0.494789	1.64895e-15	8.20332e-13	CUX1	Body	opensea
685	cg10351914	0.73859	0.243829	0.494761	4.19797e-08	1.79509e-06	MFAP4	TSS200	opensea
686	cg14537825	0.82874	0.334079	0.494661	7.21374e-09	3.99561e-07	ZAP70	Body	shelf
687	cg21594043	0.763991	0.269745	0.494246	5.59908e-10	4.38404e-08	SLCO3A1	Body	opensea
688	cg10862567	0.901991	0.407749	0.494242	2.90255e-09	1.82697e-07	TBCD	Body	opensea
689	cg07515422	0.742184	0.247998	0.494186	1.10227e-07	4.10424e-06	SPTBN4	Body	shelf
690	cg12472597	0.865522	0.371367	0.494155	1.10533e-08	5.7382e-07	LOC100130987	Body	shore
691	cg05037556	0.762882	0.268794	0.494088	1.03803e-06	2.75165e-05	C2orf34	Body	opensea
692	cg13912573	0.779005	0.285151	0.493854	2.23299e-08	1.04813e-06	LOC100129066	Body	shore
693	cg15676711	0.891839	0.398018	0.493821	1.86082e-10	1.69898e-08	ERRFI1	3'UTR	opensea
694	cg15344504	0.704618	0.210826	0.493792	1.23833e-06	3.1928e-05	STT3B	Body	opensea
695	cg05815196	0.696045	0.202429	0.493615	2.173e-07	7.32e-06	PLA2G3	TSS200	opensea
696	cg23129573	0.718815	0.225219	0.493596	2.56955e-05	0.000408089	ELN	5'UTR	opensea
697	cg07411420	0.792769	0.299176	0.493593	4.02603e-09	2.42095e-07	ERC2	5'UTR	opensea
698	cg13675278	0.711623	0.218186	0.493438	8.21099e-05	0.0010818	TRPM3	Body	opensea
699	cg02258482	0.702788	0.209375	0.493414	3.80078e-07	1.17506e-05	COG7	Body	opensea
700	cg18876728	0.451608	0.944871	-0.493263	1.54034e-05	0.00026548	TGFB2	Body	opensea
701	cg09639890	0.764137	0.271008	0.493129	9.50913e-09	5.03687e-07	FGF12	Body	opensea
702	cg01841651	0.580037	0.0870506	0.492987	6.47314e-07	1.84467e-05	FLJ23834	Body	opensea
703	cg00037952	0.779088	0.286324	0.492764	3.14036e-06	6.99953e-05	C10orf26	TSS1500	opensea
704	cg11520719	0.789858	0.297263	0.492595	1.26674e-10	1.22001e-08	ARID1B	Body	opensea
705	cg06450952	0.960927	0.468337	0.49259	2.38593e-17	2.6813e-14	C8orf56	Body	opensea
706	cg16581017	0.715615	0.22316	0.492455	1.75793e-07	6.11258e-06	MYL10	3'UTR	opensea
707	cg00608540	0.912956	0.420524	0.492432	2.57466e-13	6.0293e-11	TRIM7	TSS200	shelf
708	cg05258123	0.782517	0.290091	0.492426	3.27773e-08	1.45671e-06	CUX1	Body	opensea
709	cg27517823	0.73518	0.242864	0.492316	3.82759e-09	2.31872e-07	SDC2	Body	opensea
710	cg05156137	0.749956	0.257734	0.492223	3.26043e-06	7.21994e-05	RCAN1	5'UTR	opensea
711	cg05605029	0.630407	0.138213	0.492194	7.24014e-06	0.000141277	PIGL	Body	opensea
712	cg06799321	0.60811	0.115955	0.492155	2.48442e-06	5.7611e-05	CES3	1stExon	opensea
713	cg06738031	0.700239	0.208129	0.492111	2.61705e-07	8.55447e-06	CTBP2	5'UTR	opensea
714	cg21695727	0.918349	0.426257	0.492092	9.96353e-09	5.2398e-07	ZNF592	3'UTR	opensea
715	cg18160691	0.794806	0.302717	0.49209	6.5745e-10	5.03e-08	LRP5	Body	shore
716	cg25276694	0.761171	0.269162	0.492008	1.48098e-07	5.28055e-06	FBXO2	Body	island
717	cg22592108	0.691218	0.199385	0.491832	2.65557e-06	6.08807e-05	ARL15	Body	opensea
718	cg16145324	0.809453	0.31765	0.491803	1.48094e-10	1.40019e-08	MAPK14	Body	opensea
719	cg16860004	0.77448	0.282697	0.491783	1.64362e-10	1.53046e-08	NCALD	TSS1500	shore
720	cg23475725	0.833497	0.341806	0.491691	3.80046e-08	1.64721e-06	CACNA1C	Body	opensea
721	cg20372666	0.919189	0.427613	0.491576	9.33394e-12	1.29733e-09	HK1	Body	opensea
722	cg23331653	0.825009	0.333435	0.491573	9.57569e-10	6.97055e-08	LRTM2	TSS200	opensea
723	cg10406027	0.573756	0.0822035	0.491552	3.41303e-05	0.000519228	ZC3H7A	TSS1500	opensea
724	cg16920238	0.866508	0.37526	0.491248	1.97611e-06	4.74558e-05	CCDC57	Body	opensea
725	cg17327331	0.751681	0.260506	0.491176	8.08192e-07	2.22405e-05	MPP5	5'UTR	opensea
726	cg01516792	0.952942	0.461895	0.491047	1.34049e-18	3.07897e-15	RPTOR	Body	shelf
727	cg16286925	0.896613	0.405613	0.491	2.85619e-15	1.3033e-12	FER	Body	opensea
728	cg12194336	0.677764	0.186828	0.490936	4.33855e-08	1.8482e-06	FLNB	Body	opensea
729	cg26999775	0.823534	0.333038	0.490496	2.29834e-06	5.38376e-05	KIAA0284	Body	shelf
730	cg16837557	0.797484	0.307022	0.490462	2.48546e-10	2.17718e-08	KIRREL3	Body	opensea
731	cg02606840	0.939656	0.449408	0.490247	8.4714e-18	1.16751e-14	MGAT4A	TSS1500	opensea
732	cg24633390	0.703812	0.21357	0.490242	4.41814e-06	9.34005e-05	TNFSF4	Body	opensea
733	cg20631351	0.723402	0.233622	0.48978	1.06188e-07	3.97925e-06	PALM	Body	island
734	cg04035064	0.185224	0.674921	-0.489698	2.94079e-07	9.43427e-06	PRKCE	Body	opensea
735	cg19725343	0.689371	0.199726	0.489646	6.57477e-05	0.000899643	IGLON5	Body	island
736	cg25193885	0.876638	0.387018	0.489621	1.74569e-13	4.35025e-11	SHANK2	Body	shelf
737	cg00169122	0.868069	0.37858	0.489489	6.68981e-12	9.76749e-10	ANKRD11	5'UTR	shore
738	cg10474597	0.804363	0.314881	0.489482	8.10708e-11	8.32627e-09	SERPINE3	Body	opensea
739	cg04497684	0.236144	0.725526	-0.489382	1.9506e-06	4.69344e-05	SRGAP3	Body	opensea
740	cg11931953	0.961057	0.471761	0.489296	1.99119e-18	4.15309e-15	FOXK1	Body	shelf
741	cg22378853	0.670451	0.181165	0.489285	1.89932e-05	0.000316804	BLCAP	5'UTR	shore
742	cg19119594	0.780852	0.291583	0.489269	1.3219e-07	4.79592e-06	PRR5	5'UTR	shelf
743	cg26951839	0.719945	0.231012	0.488933	1.79625e-05	0.000302107	LHFPL2	Body	opensea
744	cg18770216	0.688116	0.199326	0.48879	8.20585e-07	2.25299e-05	ITGB5	Body	opensea
745	cg17121197	0.380945	0.869614	-0.488669	2.60767e-05	0.000413195	FBXW8	Body	shelf
746	cg02729303	0.55634	0.067687	0.488653	0.000381045	0.00390549	FAM134B	Body	opensea
747	cg21151432	0.63104	0.142411	0.488629	3.59547e-05	0.000542391	ADCY3	TSS200	shore
748	cg13702846	0.820376	0.331784	0.488592	7.78989e-10	5.8394e-08	CCBP2	5'UTR	opensea
749	cg06854772	0.812856	0.324391	0.488465	8.95223e-08	3.43941e-06	LETM1	Body	shelf
750	cg03035849	0.87387	0.38542	0.48845	1.36031e-07	4.90908e-06	BACH2	5'UTR	shore
751	cg26975461	0.687891	0.199549	0.488342	1.49906e-05	0.000259414	USP53	5'UTR	opensea
752	cg24661595	0.868222	0.379893	0.488328	1.32253e-11	1.75166e-09	SHANK2	Body	opensea
753	cg07731871	0.673433	0.185117	0.488316	4.36371e-06	9.24742e-05	CACNB2	Body	opensea
754	cg18127159	0.231987	0.720175	-0.488188	5.20023e-06	0.000107167	MAML3	Body	opensea
755	cg24117468	0.819586	0.331461	0.488125	6.23222e-10	4.79601e-08	P4HA2	5'UTR	shore
756	cg25824828	0.73139	0.243293	0.488097	1.82382e-06	4.42598e-05	CACNA1I	Body	opensea
757	cg19320820	0.681463	0.193458	0.488005	5.92935e-05	0.000824352	AFF1	Body	opensea
758	cg06255004	0.765149	0.277188	0.48796	5.58933e-10	4.37724e-08	AGPAT2	Body	shore
759	cg23757899	0.572063	0.0841486	0.487915	2.3434e-05	0.000377897	P2RY2	TSS1500	island
760	cg12220426	0.782089	0.2942	0.487889	3.54359e-06	7.75228e-05	TACR1	Body	opensea
761	cg11082691	0.716945	0.229227	0.487718	1.17977e-06	3.0668e-05	TNFRSF19	Body	opensea
762	cg09888026	0.626071	0.138355	0.487715	1.75565e-06	4.28604e-05	TMEM105	5'UTR	opensea
763	cg10379077	0.94374	0.456413	0.487328	5.73345e-19	1.82599e-15	CLEC16A	Body	opensea
764	cg15470102	0.795164	0.307844	0.48732	1.32464e-09	9.21507e-08	HCCA2	Body	opensea
765	cg23246821	0.635211	0.147944	0.487267	6.38391e-08	2.57923e-06	TM4SF1	TSS200	opensea
766	cg16379462	0.674475	0.187413	0.487062	1.08752e-10	1.06953e-08	SAMD4A	Body	opensea
767	cg20271361	0.620068	0.133083	0.486986	1.3558e-06	3.44086e-05	CACNA1G	Body	opensea
768	cg06846884	0.442322	0.929296	-0.486974	1.48319e-05	0.000257085	DDX10	Body	opensea
769	cg21764358	0.907138	0.420346	0.486792	6.67549e-11	7.01672e-09	GRLF1	3'UTR	shore
770	cg15855924	0.633694	0.146919	0.486775	2.465e-05	0.000394253	ANKRD10	Body	shore
771	cg02960500	0.934965	0.448373	0.486592	3.99741e-18	6.76716e-15	NTM	Body	opensea
772	cg14742809	0.791741	0.305177	0.486564	8.28671e-09	4.47923e-07	ZSWIM6	Body	shore
773	cg00463367	0.24132	0.727836	-0.486517	1.38819e-05	0.000243275	GATA3	Body	shelf
774	cg24636969	0.696521	0.210033	0.486487	1.85625e-07	6.40694e-06	ZNF704	TSS200	shore
775	cg03069731	0.769413	0.282948	0.486466	1.01273e-08	5.31562e-07	ST7	Body	opensea
776	cg07780199	0.914146	0.427707	0.486438	1.33984e-13	3.44787e-11	CRTC1	Body	shore
777	cg25320780	0.76055	0.274493	0.486057	4.97277e-08	2.08252e-06	SLC16A4	5'UTR	opensea
778	cg09968461	0.813434	0.327479	0.485955	1.97495e-07	6.75774e-06	SLC8A1	Body	opensea
779	cg16957313	0.753056	0.267259	0.485797	2.8838e-07	9.27406e-06	DUSP1	TSS1500	shore
780	cg12091331	0.698158	0.212525	0.485634	4.40312e-07	1.3319e-05	PLAT	TSS200	opensea
781	cg04774696	0.885406	0.399779	0.485627	5.02359e-15	2.12145e-12	ODZ3	Body	opensea
782	cg16209517	0.830705	0.345274	0.48543	1.45882e-10	1.38173e-08	KIAA1737	Body	opensea
783	cg13928417	0.766029	0.280739	0.48529	4.2911e-08	1.83047e-06	DAB2IP	Body	island
784	cg14533298	0.260861	0.745978	-0.485118	2.58637e-07	8.47133e-06	PXDNL	Body	opensea
785	cg09982773	0.811142	0.326128	0.485014	3.25263e-10	2.76202e-08	KCP	TSS200	island
786	cg06807650	0.818392	0.333583	0.484809	6.78641e-10	5.17369e-08	PKNOX2	5'UTR	opensea
787	cg14592260	0.916835	0.432123	0.484712	4.77194e-16	2.99026e-13	DDX10	Body	opensea
788	cg19719478	0.721707	0.23703	0.484677	3.98716e-06	8.56708e-05	C12orf36	Body	opensea
789	cg08754294	0.663627	0.178954	0.484673	8.10409e-06	0.000155239	AKAP1	5'UTR	opensea
790	cg24873592	0.690743	0.20609	0.484653	7.16562e-08	2.84684e-06	TINAGL1	5'UTR	opensea
791	cg00751501	0.398412	0.883052	-0.48464	5.05587e-05	0.000721402	WFDC1	Body	shelf
792	cg09773458	0.721691	0.237213	0.484479	1.34861e-06	3.42517e-05	SLN	TSS1500	opensea
793	cg15028507	0.724125	0.239748	0.484377	3.19691e-06	7.10342e-05	C7orf50	Body	shore
794	cg08750534	0.710006	0.225631	0.484376	4.97879e-10	3.98244e-08	SPRED2	Body	opensea
795	cg19951107	0.24343	0.727779	-0.484349	1.51946e-06	3.79576e-05	TMPRSS7	5'UTR	opensea
796	cg11155374	0.389517	0.873748	-0.484231	1.69244e-06	4.15885e-05	FREM2	Body	opensea
797	cg08624472	0.600347	0.116121	0.484226	7.09932e-07	1.99524e-05	ARPC1B	TSS1500	island
798	cg02665650	0.807896	0.32369	0.484206	2.57861e-08	1.18499e-06	ANKS1A	Body	opensea
799	cg25832824	0.620821	0.136788	0.484033	4.61559e-06	9.6856e-05	CMKLR1	TSS200	opensea
800	cg24079727	0.878279	0.394256	0.484024	1.58645e-07	5.59743e-06	TCF12	Body	opensea
801	cg04042468	0.655617	0.171832	0.483785	7.90255e-06	0.000151964	BIK	TSS1500	island
802	cg19314352	0.601752	0.11816	0.483593	1.09821e-06	2.88605e-05	RARA	Body	island
803	cg26529687	0.276414	0.759955	-0.483541	1.55399e-06	3.86826e-05	NCKAP5	Body	opensea
804	cg02830936	0.743759	0.260245	0.483513	2.72111e-08	1.24103e-06	MTMR9L	TSS1500	shore
805	cg27168076	0.798309	0.314825	0.483483	1.43833e-11	1.88363e-09	ARMC9	Body	opensea
806	cg03707168	0.596435	0.113001	0.483434	3.44894e-05	0.000523967	PPP1R15A	Body	shelf
807	cg12628879	0.713518	0.230172	0.483346	4.05614e-08	1.74175e-06	KCNQ2	Body	shore
808	cg01954585	0.787244	0.303916	0.483328	1.15595e-08	5.94876e-07	AKAP13	Body	opensea
809	cg25106707	0.762988	0.27981	0.483179	1.38306e-07	4.98061e-06	C1QTNF7	TSS200	opensea
810	cg12072740	0.230868	0.71403	-0.483162	1.35627e-07	4.89841e-06	TMEM132D	Body	opensea
811	cg10403394	0.829926	0.34678	0.483145	2.005e-06	4.80019e-05	TPM1	Body	opensea
812	cg14041976	0.834293	0.351306	0.482987	1.21928e-08	6.22388e-07	C1QB	TSS1500	opensea
813	cg18114828	0.678	0.195038	0.482962	6.08133e-07	1.75112e-05	INSR	Body	shore
814	cg16787483	0.401136	0.884083	-0.482947	5.61257e-05	0.000786935	SLITRK5	Body	shore
815	cg01708411	0.674006	0.191145	0.482861	6.03343e-07	1.73892e-05	NDUFA4L2	5'UTR	shore
816	cg18658787	0.434956	0.917807	-0.482851	4.66244e-05	0.000674441	LTBP1	Body	opensea
817	cg25444208	0.555677	0.0729228	0.482754	0.000332174	0.00348624	SOX2OT	Body	island
818	cg27549720	0.840099	0.357426	0.482672	8.62669e-10	6.36841e-08	HTR6	5'UTR	island
819	cg05126581	0.366535	0.849173	-0.482637	2.90657e-06	6.56245e-05	USH2A	Body	opensea
820	cg07145598	0.913229	0.43061	0.482619	5.05146e-18	7.91981e-15	IQCH	Body	opensea
821	cg21223094	0.702168	0.21963	0.482539	1.19936e-07	4.41856e-06	ETV6	Body	opensea
822	cg04923845	0.51914	0.0366917	0.482448	1.25507e-05	0.000223821	VTI1A	3'UTR	opensea
823	cg24046474	0.648448	0.166003	0.482444	3.89635e-06	8.4028e-05	RPL12	Body	shore
824	cg00834924	0.809261	0.326857	0.482404	2.07201e-06	4.9355e-05	AKAP13	5'UTR	opensea
825	cg21765235	0.875565	0.393244	0.482321	1.18554e-11	1.59245e-09	ODZ4	5'UTR	opensea
826	cg15564619	0.68157	0.199307	0.482262	3.73531e-06	8.10995e-05	SKI	Body	shelf
827	cg16311462	0.319842	0.80204	-0.482198	5.24244e-06	0.000107917	STK10	Body	opensea
828	cg00523012	0.681124	0.198996	0.482128	7.80367e-07	2.15796e-05	IER2	Body	island
829	cg02987482	0.611591	0.129593	0.481998	9.383e-06	0.000175663	MLLT1	Body	shelf
830	cg26301690	0.772171	0.290188	0.481983	4.22835e-05	0.000621276	ELAVL4	Body	opensea
831	cg01922580	0.428416	0.910323	-0.481907	1.30653e-06	3.33678e-05	PCSK6	Body	opensea
832	cg09845941	0.851066	0.369327	0.481739	7.63617e-09	4.18976e-07	IGSF21	Body	opensea
833	cg14258143	0.688121	0.20648	0.481641	1.3309e-07	4.82266e-06	FAM167B	Body	island
834	cg08368520	0.803988	0.322447	0.481542	4.97888e-13	1.04158e-10	FOXK1	Body	opensea
835	cg07769015	0.864932	0.383424	0.481508	1.87235e-11	2.35236e-09	SLC45A4	TSS200	shore
836	cg14467276	0.2252	0.706673	-0.481474	7.97312e-10	5.95051e-08	PTPDC1	TSS200	opensea
837	cg20780302	0.851734	0.370417	0.481317	1.80772e-10	1.65568e-08	CCDC57	Body	shelf
838	cg04663932	0.710326	0.229071	0.481255	6.20461e-07	1.77982e-05	LIMK1	Body	opensea
839	cg10342899	0.755358	0.274188	0.48117	1.28694e-08	6.52245e-07	KAZALD1	5'UTR	island
840	cg00950718	0.773382	0.2923	0.481082	4.3703e-06	9.25706e-05	CCDC19	Body	opensea
841	cg11510043	0.932383	0.451315	0.481068	1.70191e-13	4.24894e-11	MBNL2	Body	opensea
842	cg04055819	0.610887	0.129827	0.481059	4.42303e-05	0.000645025	FRMD4A	Body	opensea
843	cg08066024	0.916494	0.435859	0.480634	9.34891e-11	9.40282e-09	NRXN1	Body	opensea
844	cg09414280	0.899919	0.419349	0.48057	1.20398e-12	2.21039e-10	CIT	Body	shore
845	cg05054438	0.520859	0.0403104	0.480549	3.20277e-06	7.11427e-05	ALDH2	Body	opensea
846	cg16808156	0.676901	0.196551	0.48035	8.60621e-07	2.34476e-05	MAVS	Body	opensea
847	cg17253709	0.64197	0.161668	0.480301	2.47116e-09	1.58903e-07	B3GNT2	5'UTR	opensea
848	cg14592928	0.807749	0.327562	0.480187	1.15756e-09	8.19818e-08	ANGPT4	TSS1500	opensea
849	cg06570432	0.842199	0.362026	0.480174	6.45719e-14	1.82167e-11	SORCS2	Body	opensea
850	cg19008097	0.811871	0.331746	0.480125	1.05777e-07	3.96714e-06	CD14	1stExon	shore
851	cg24681408	0.798368	0.318492	0.479876	1.22981e-07	4.50997e-06	LOC92659	Body	island
852	cg21551979	0.893416	0.413708	0.479708	4.62738e-13	9.7757e-11	AP2A2	Body	shelf
853	cg26363039	0.812642	0.332979	0.479663	4.5313e-07	1.36451e-05	LOC100292680	TSS200	opensea
854	cg09012001	0.78281	0.303355	0.479455	7.61092e-10	5.72628e-08	IFFO2	Body	opensea
855	cg00997853	0.787956	0.308578	0.479378	2.98886e-07	9.56968e-06	ITPR2	Body	opensea
856	cg10245608	0.700662	0.22147	0.479192	2.05459e-07	6.98398e-06	GADD45G	3'UTR	island
857	cg01532749	0.863405	0.384325	0.47908	4.45856e-12	6.84024e-10	MRAS	5'UTR	opensea
858	cg24301724	0.555981	0.0771213	0.47886	2.40105e-07	7.94906e-06	GPR133	Body	opensea
859	cg19724567	0.741363	0.262554	0.478809	1.17232e-06	3.05036e-05	IFRD1	TSS200	opensea
860	cg26315985	0.67882	0.200046	0.478774	0.000204997	0.0023297	JAK1	5'UTR	opensea
861	cg14900246	0.836462	0.357709	0.478752	4.98881e-10	3.98811e-08	MERTK	TSS1500	shore
862	cg02050917	0.849704	0.370983	0.478721	4.57951e-14	1.35866e-11	SKI	Body	opensea
863	cg11248493	0.307604	0.786261	-0.478657	8.242e-07	2.26215e-05	C17orf101	Body	shelf
864	cg15036894	0.777739	0.299193	0.478546	1.28898e-08	6.52954e-07	FAM134B	Body	opensea
865	cg22705929	0.780023	0.301555	0.478468	1.99734e-06	4.78501e-05	YPEL4	TSS1500	shelf
866	cg23328404	0.845292	0.366843	0.478449	1.19347e-09	8.4247e-08	CSGALNACT1	Body	opensea
867	cg12592365	0.861973	0.383526	0.478447	1.99691e-07	6.81858e-06	RPTOR	Body	opensea
868	cg13959241	0.920648	0.442327	0.478321	5.01244e-13	1.04645e-10	NACC2	Body	shore
869	cg17457014	0.759153	0.280923	0.478229	5.53415e-08	2.28294e-06	TTC22	Body	opensea
870	cg09615821	0.743257	0.265086	0.478171	1.08172e-05	0.000197891	VAC14	Body	opensea
871	cg18900812	0.7782	0.30004	0.47816	1.01104e-07	3.81504e-06	CDKN1A	TSS1500	shore
872	cg27519622	0.661698	0.183644	0.478054	6.05759e-07	1.74502e-05	CCDC64B	Body	island
873	cg18722086	0.901309	0.423306	0.478003	1.589e-12	2.80856e-10	KIAA2018	Body	opensea
874	cg25181284	0.279626	0.757459	-0.477833	1.32577e-07	4.80742e-06	GPD1	TSS1500	opensea
875	cg18500448	0.741066	0.263255	0.477812	2.19405e-05	0.000357757	ZNF767	TSS1500	shore
876	cg13615337	0.267188	0.744948	-0.47776	9.96782e-07	2.65943e-05	OR2H1	5'UTR	opensea
877	cg04387396	0.590211	0.112461	0.477749	2.85817e-06	6.46821e-05	SGPL1	Body	opensea
878	cg08062273	0.809224	0.331538	0.477686	3.86703e-10	3.20047e-08	LIMD1	Body	opensea
879	cg21268984	0.803625	0.325968	0.477657	3.96714e-08	1.7101e-06	RERE	5'UTR	opensea
880	cg21324456	0.774678	0.297109	0.477569	8.43832e-08	3.27061e-06	ATP9A	Body	opensea
881	cg00523683	0.828697	0.351148	0.477549	2.64536e-08	1.21076e-06	RPTOR	Body	opensea
882	cg04314652	0.588386	0.110992	0.477394	1.25072e-05	0.000223114	NFAT5	TSS1500	shore
883	cg24310786	0.655086	0.177816	0.47727	1.28673e-05	0.000228449	HLA-DPB2	TSS1500	opensea
884	cg14036776	0.65803	0.180828	0.477202	1.65508e-05	0.000282063	ERLIN2	5'UTR	shore
885	cg04542977	0.561809	0.0846146	0.477194	3.3695e-05	0.000513716	EPS15	Body	shore
886	cg15269394	0.841452	0.364277	0.477175	3.58243e-10	2.99654e-08	ATP6V0A1	Body	opensea
887	cg14039237	0.656286	0.179193	0.477093	1.89895e-05	0.000316768	SLC25A25	Body	shelf
888	cg03731464	0.679031	0.202065	0.476966	1.35191e-05	0.00023791	CACNA1C	3'UTR	shore
889	cg14693353	0.898814	0.42206	0.476754	7.73852e-13	1.5148e-10	EIF2C2	Body	opensea
890	cg03338209	0.711823	0.235124	0.476699	2.37885e-07	7.88964e-06	CARD10	Body	shelf
891	cg07421596	0.819852	0.343155	0.476697	2.49337e-10	2.18318e-08	CFB	1stExon	opensea
892	cg10505873	0.678172	0.201502	0.47667	1.59724e-06	3.95975e-05	MMP9	TSS200	shore
893	cg26168643	0.422433	0.89902	-0.476586	0.000909495	0.00804098	SLITRK5	Body	shore
894	cg06471596	0.695058	0.218565	0.476494	1.38492e-05	0.000242806	CUX1	Body	opensea
895	cg23598068	0.756964	0.280518	0.476446	6.86366e-08	2.74721e-06	BAIAP2L1	Body	opensea
896	cg19242851	0.874986	0.398621	0.476366	5.80844e-10	4.52193e-08	RPH3AL	Body	opensea
897	cg13738075	0.788844	0.312484	0.476359	5.39287e-07	1.58112e-05	RASA3	Body	opensea
898	cg15367247	0.591449	0.115201	0.476248	7.6827e-06	0.000148436	DGKG	Body	opensea
899	cg10820936	0.840126	0.363998	0.476129	1.41531e-08	7.0755e-07	MREG	Body	opensea
900	cg06697380	0.299341	0.775441	-0.4761	1.02452e-05	0.000189114	MEGF10	5'UTR	opensea
901	cg03780927	0.776965	0.301066	0.475899	7.36699e-07	2.05602e-05	BCL9L	1stExon	island
902	cg16791134	0.843884	0.368003	0.475881	1.71911e-10	1.58627e-08	TIMP4	TSS1500	shore
903	cg17633431	0.882333	0.406496	0.475837	5.14238e-10	4.08049e-08	SEMA5B	5'UTR	opensea
904	cg11726288	0.649545	0.173736	0.475809	7.64272e-07	2.12078e-05	CLCN6	3'UTR	shelf
905	cg07499182	0.557993	0.0823769	0.475616	0.000253027	0.00277606	STARD13	Body	opensea
906	cg21799346	0.510435	0.0348734	0.475562	2.14402e-05	0.000350975	CDKN1C	Body	island
907	cg05758467	0.880879	0.405385	0.475494	1.82936e-13	4.5201e-11	HDAC4	Body	shelf
908	cg14281592	0.666448	0.190997	0.475451	1.38228e-06	3.49826e-05	ANGPTL2	5'UTR	opensea
909	cg13440206	0.813954	0.338748	0.475206	1.08917e-07	4.06521e-06	ABL1	Body	shore
910	cg06867623	0.893283	0.418372	0.474911	4.90522e-14	1.43791e-11	WDR25	Body	opensea
911	cg15876464	0.630121	0.155215	0.474906	3.76444e-07	1.16523e-05	MMP9	Body	island
912	cg23478124	0.77813	0.303274	0.474855	5.0581e-07	1.49749e-05	PICALM	Body	shelf
913	cg02631092	0.820308	0.345659	0.474649	5.45975e-08	2.25635e-06	GBF1	Body	opensea
914	cg24636368	0.636747	0.162137	0.47461	6.91507e-05	0.000937341	SKAP1	Body	opensea
915	cg17749454	0.766948	0.292341	0.474606	8.78549e-08	3.38555e-06	SLC16A5	Body	shelf
916	cg11383981	0.840726	0.366202	0.474524	3.16243e-09	1.96869e-07	LRTM1	TSS1500	opensea
917	cg08370546	0.668418	0.193897	0.474522	1.78535e-06	4.34581e-05	PHKG1	TSS200	opensea
918	cg15388974	0.843881	0.369412	0.474468	1.12568e-12	2.09589e-10	PRKD1	Body	opensea
919	cg14539658	0.8122	0.337741	0.474459	7.80486e-09	4.2674e-07	NDRG2	TSS1500	shore
920	cg10576245	0.658012	0.183581	0.474431	0.000259165	0.00283084	PCNXL2	Body	opensea
921	cg11440915	0.301061	0.775463	-0.474402	0.000547924	0.00528477	LMO7	Body	opensea
922	cg02346563	0.944447	0.470088	0.47436	5.7919e-20	3.83142e-16	TUB	Body	opensea
923	cg14802312	0.831438	0.357233	0.474205	1.05562e-08	5.51664e-07	ARHGAP9	TSS1500	shelf
924	cg02324432	0.803345	0.329186	0.474159	2.06828e-05	0.000340482	KLHL2	TSS1500	shore
925	cg11348165	0.923789	0.449745	0.474044	9.68713e-17	8.30201e-14	SFN	TSS1500	shore
926	cg21116266	0.723774	0.249776	0.473998	3.20409e-09	1.99006e-07	ITGBL1	1stExon	shore
927	cg19861427	0.843412	0.369447	0.473965	1.21315e-12	2.22623e-10	CRTC1	Body	island
928	cg26215406	0.811152	0.337271	0.473881	2.46128e-07	8.12273e-06	MCF2L2	Body	island
929	cg14121282	0.705134	0.231312	0.473822	1.00829e-08	5.29506e-07	RXRA	Body	opensea
930	cg08079596	0.52521	0.0514131	0.473797	0.000192329	0.00220904	ATOH8	Body	opensea
931	cg23540210	0.350113	0.823896	-0.473783	5.80133e-07	1.68285e-05	CCDC39	3'UTR	opensea
932	cg23415212	0.683362	0.209629	0.473734	6.13592e-07	1.76373e-05	CACNB1	3'UTR	island
933	cg05393025	0.759505	0.285884	0.473621	1.32951e-10	1.27225e-08	RNF186	TSS200	opensea
934	cg17875657	0.805464	0.331905	0.473559	3.24779e-07	1.02801e-05	MAP2	5'UTR	opensea
935	cg23356505	0.267625	0.741105	-0.47348	1.63737e-05	0.000279675	UTRN	1stExon	opensea
936	cg11100795	0.80083	0.327404	0.473426	1.46347e-06	3.67456e-05	AP3B1	Body	opensea
937	cg23047825	0.306535	0.77975	-0.473215	7.52467e-07	2.09286e-05	IGF1R	Body	opensea
938	cg22534097	0.920302	0.447121	0.473181	1.60218e-13	4.02457e-11	ANKRD1	TSS200	opensea
939	cg07893801	0.786824	0.313644	0.47318	3.29447e-08	1.46304e-06	PLCG1	Body	shore
940	cg23370360	0.319369	0.792502	-0.473132	2.24471e-07	7.51256e-06	CRISP1	TSS200	opensea
941	cg05256043	0.757472	0.284353	0.473119	1.39493e-06	3.52438e-05	DCT	TSS200	opensea
942	cg06889086	0.833876	0.360796	0.473079	9.00868e-10	6.60851e-08	VOPP1	Body	shore
943	cg02049210	0.770957	0.297896	0.473061	5.6038e-06	0.000113947	KIAA0146	Body	shelf
944	cg25774643	0.637158	0.164203	0.472955	1.96346e-05	0.000325969	SCT	TSS200	island
945	cg25146976	0.618797	0.145854	0.472943	8.32105e-08	3.23161e-06	LHFPL4	Body	opensea
946	cg23963984	0.773112	0.300212	0.4729	3.86075e-07	1.19133e-05	DLG5	Body	opensea
947	cg21477176	0.664862	0.192094	0.472768	7.76278e-07	2.14854e-05	CACNG7	3'UTR	shore
948	cg15205435	0.795399	0.322728	0.472672	6.99067e-08	2.789e-06	CHD5	Body	island
949	cg08271031	0.743137	0.270716	0.472421	6.04924e-08	2.46152e-06	PARVG	TSS200	opensea
950	cg20719001	0.827877	0.355564	0.472313	3.47349e-10	2.92099e-08	TMEM105	5'UTR	opensea
951	cg16580765	0.961268	0.489143	0.472126	3.75355e-22	9.57012e-18	PRKD2	Body	shore
952	cg04004558	0.701712	0.229619	0.472093	7.30859e-09	4.04156e-07	SOCS1	3'UTR	island
953	cg21940640	0.736893	0.264818	0.472075	2.69162e-07	8.75611e-06	PHKG1	TSS1500	opensea
954	cg18657988	0.623606	0.151565	0.472041	3.56158e-08	1.5626e-06	FOXN3	Body	opensea
955	cg12914733	0.853913	0.3819	0.472013	1.0656e-13	2.84676e-11	AP2A2	Body	opensea
956	cg01607321	0.814651	0.342655	0.471995	1.20777e-09	8.5067e-08	ARHGEF10	Body	opensea
957	cg10587082	0.794345	0.322454	0.471891	1.38916e-08	6.9601e-07	PLXNA2	Body	opensea
958	cg22101174	0.799266	0.327424	0.471842	4.40453e-09	2.61198e-07	HDAC4	Body	opensea
959	cg04761746	0.844526	0.372715	0.471811	1.86808e-07	6.44342e-06	SCOC	TSS1500	shelf
960	cg03402235	0.658805	0.187003	0.471802	4.77244e-05	0.000687453	ZFP106	1stExon	opensea
961	cg21605238	0.336547	0.808346	-0.471799	2.64894e-06	6.07697e-05	FREM2	1stExon	shelf
962	cg12486493	0.692368	0.220594	0.471774	1.78522e-07	6.19586e-06	IGF1R	Body	opensea
963	cg25215498	0.763098	0.291376	0.471723	2.14963e-10	1.92138e-08	PEX5L	Body	opensea
964	cg23731030	0.575694	0.104055	0.471639	4.53433e-06	9.53814e-05	ERBB2	5'UTR	shore
965	cg13527921	0.813402	0.341768	0.471634	2.66596e-07	8.68718e-06	NANS	Body	shore
966	cg02646615	0.388203	0.859788	-0.471585	1.47655e-06	3.704e-05	ERC2	5'UTR	shore
967	cg01132579	0.790518	0.318984	0.471533	1.60361e-08	7.88449e-07	MSI2	Body	opensea
968	cg04493169	0.91766	0.446236	0.471424	5.33448e-14	1.54227e-11	JAZF1	Body	opensea
969	cg10710412	0.623109	0.151708	0.471401	5.14758e-07	1.52023e-05	NKG7	TSS200	opensea
970	cg11532513	0.791077	0.319685	0.471392	2.29238e-07	7.64824e-06	LRTM1	TSS200	opensea
971	cg02973792	0.826042	0.354774	0.471268	3.18382e-05	0.000489709	FBXW8	Body	opensea
972	cg07437464	0.672567	0.201511	0.471056	3.86361e-08	1.67156e-06	LOC349114	Body	opensea
973	cg19257550	0.840389	0.369423	0.470966	1.09884e-07	4.09481e-06	CA9	TSS200	shore
974	cg05850884	0.90302	0.432055	0.470965	1.40658e-14	5.09139e-12	TRIM26	5'UTR	opensea
975	cg18009653	0.828057	0.357095	0.470962	3.57839e-08	1.56846e-06	WDR1	3'UTR	shelf
976	cg16293118	0.832325	0.361518	0.470806	3.74871e-11	4.25855e-09	ITGBL1	1stExon	shore
977	cg02903822	0.767456	0.296709	0.470747	7.87571e-07	2.1742e-05	WISP1	5'UTR	opensea
978	cg22164891	0.610225	0.139503	0.470722	0.000174285	0.00203421	ZNF217	TSS200	shore
979	cg03224812	0.602122	0.131431	0.470691	0.000284713	0.00306243	EFCAB4B	5'UTR	opensea
980	cg08775835	0.826415	0.355842	0.470573	3.7597e-07	1.16447e-05	PRSS8	1stExon	opensea
981	cg00648184	0.841076	0.37052	0.470556	3.79746e-07	1.17412e-05	MARCH10	Body	opensea
982	cg08752433	0.840167	0.369785	0.470382	6.6602e-06	0.000131667	PPTC7	Body	shelf
983	cg05988266	0.920054	0.449678	0.470376	1.56104e-13	3.93578e-11	SUCLG2	Body	opensea
984	cg12770844	0.444309	0.91466	-0.470351	2.17013e-05	0.000354566	FAT1	Body	opensea
985	cg07213414	0.83328	0.36298	0.4703	5.08074e-07	1.50309e-05	USP31	Body	opensea
986	cg24394819	0.789919	0.31963	0.470288	1.38484e-05	0.000242804	RPTOR	Body	opensea
987	cg11566131	0.829965	0.359707	0.470257	1.17064e-09	8.28071e-08	MED12L	Body	opensea
988	cg07570498	0.775341	0.305101	0.47024	6.63069e-07	1.88194e-05	PHC2	5'UTR	shore
989	cg05707492	0.766856	0.296674	0.470182	8.04362e-07	2.2147e-05	RPTOR	Body	shore
990	cg01059100	0.690242	0.22014	0.470102	1.34e-06	3.40676e-05	PYCARD	TSS1500	shore
991	cg22700848	0.607312	0.137491	0.469821	4.69121e-06	9.81902e-05	NCOR2	5'UTR	opensea
992	cg00445232	0.884283	0.41451	0.469774	1.30848e-13	3.37623e-11	SMAD3	Body	opensea
993	cg25098793	0.872523	0.402837	0.469686	2.25844e-11	2.76419e-09	DHCR24	Body	opensea
994	cg22369786	0.821286	0.351601	0.469685	3.35741e-10	2.83917e-08	SPRY2	Body	shore
995	cg04404304	0.821484	0.351835	0.469649	8.12771e-06	0.000155633	TRAPPC9	Body	opensea
996	cg22828884	0.843472	0.373855	0.469617	4.14433e-12	6.4185e-10	FOXP1	Body	opensea
997	cg25073705	0.946687	0.47737	0.469317	1.64597e-15	8.19846e-13	AP2A2	Body	island
998	cg18677716	0.929016	0.459706	0.46931	1.22686e-17	1.51946e-14	PCNT	3'UTR	opensea
999	cg18158670	0.894368	0.425202	0.469166	2.75772e-08	1.25472e-06	IGF1R	Body	shore
1000	cg23416081	0.716818	0.247737	0.469081	3.05854e-06	6.84796e-05	FKBP5	5'UTR	shelf
1001	cg08249698	0.296078	0.76513	-0.469052	7.9433e-08	3.10381e-06	A2BP1	5'UTR	opensea
1002	cg27021181	0.720173	0.251138	0.469035	3.97274e-06	8.54215e-05	NET1	Body	shore
1003	cg11960784	0.389411	0.858445	-0.469034	7.91127e-08	3.09278e-06	SEH1L	3'UTR	shelf
1004	cg22851080	0.672053	0.20309	0.468963	9.9151e-07	2.64744e-05	TNXB	Body	shelf
1005	cg25541621	0.730453	0.261525	0.468928	1.88392e-06	4.55098e-05	FMO6P	TSS200	opensea
1006	cg07502417	0.694278	0.225362	0.468917	6.76688e-06	0.00013344	AGT	5'UTR	opensea
1007	cg02330500	0.574271	0.105383	0.468888	8.24936e-05	0.00108584	CLMN	Body	opensea
1008	cg07411165	0.635186	0.166396	0.46879	9.92338e-06	0.000184174	ZNF827	Body	opensea
1009	cg07291100	0.575376	0.106716	0.46866	1.29571e-05	0.000229676	CLSTN2	Body	opensea
1010	cg02419920	0.350459	0.818802	-0.468342	0.000231124	0.00257404	SLC10A4	Body	shore
1011	cg13255398	0.688286	0.220041	0.468246	3.83062e-07	1.1833e-05	PLEKHA7	Body	opensea
1012	cg26888672	0.671447	0.203286	0.468161	6.05441e-06	0.000121523	OBFC1	Body	opensea
1013	cg23850913	0.751233	0.283108	0.468125	6.30703e-07	1.80465e-05	JARID2	Body	opensea
1014	cg03124636	0.802369	0.3343	0.468069	2.74673e-10	2.381e-08	IER3	3'UTR	island
1015	cg00382999	0.649658	0.181642	0.468016	5.86731e-06	0.00011835	NCK1	Body	opensea
1016	cg11903057	0.846032	0.378027	0.468005	2.59203e-06	5.96664e-05	RHOH	5'UTR	opensea
1017	cg03611487	0.89532	0.427345	0.467976	5.24949e-10	4.15534e-08	LOC100126784	TSS1500	shore
1018	cg01061956	0.556869	0.0889114	0.467958	3.5781e-06	7.81981e-05	PPP2R2C	Body	opensea
1019	cg16978268	0.755228	0.287275	0.467953	3.54178e-06	7.74915e-05	PHLPP1	3'UTR	opensea
1020	cg10354406	0.346365	0.814179	-0.467814	1.08088e-05	0.000197772	MRPS35	3'UTR	opensea
1021	cg05757907	0.934998	0.467318	0.46768	1.11736e-13	2.95026e-11	REXO2	Body	shelf
1022	cg02695969	0.815921	0.348246	0.467676	8.8493e-11	8.98898e-09	ARID3A	Body	island
1023	cg03199239	0.812112	0.344548	0.467565	9.09122e-11	9.19993e-09	GNG7	5'UTR	island
1024	cg01385327	0.692525	0.224974	0.467551	1.25105e-06	3.21948e-05	FGFR2	5'UTR	shore
1025	cg06747543	0.609498	0.142023	0.467476	1.05044e-08	5.49663e-07	ELL	Body	opensea
1026	cg06173663	0.721368	0.253931	0.467437	1.28649e-05	0.000228427	CUX1	Body	opensea
1027	cg13488570	0.805303	0.337921	0.467382	4.69249e-08	1.97917e-06	SKI	Body	island
1028	cg16798537	0.800871	0.333528	0.467342	1.66011e-09	1.12589e-07	CDH16	Body	opensea
1029	cg18263969	0.724724	0.257437	0.467287	1.64118e-05	0.000280133	LGALS3BP	Body	opensea
1030	cg26749833	0.333926	0.80121	-0.467284	6.52311e-06	0.000129377	MIR489	Body	opensea
1031	cg23655039	0.678429	0.211279	0.467149	4.7457e-06	9.91985e-05	MCF2L2	Body	shore
1032	cg09109383	0.876947	0.409803	0.467145	1.15036e-10	1.12277e-08	ABCC1	Body	opensea
1033	cg00803453	0.602416	0.13528	0.467137	2.28612e-05	0.000370284	SPEG	Body	island
1034	cg11468363	0.712441	0.24541	0.467031	3.30004e-06	7.29655e-05	AFF1	5'UTR	shore
1035	cg26720913	0.765554	0.29856	0.466994	3.17402e-05	0.000488403	NR3C1	1stExon	opensea
1036	cg00915556	0.689448	0.222504	0.466944	3.37526e-08	1.49322e-06	LDLRAP1	3'UTR	opensea
1037	cg11879354	0.714356	0.247422	0.466934	2.20378e-07	7.4041e-06	SYTL3	5'UTR	opensea
1038	cg01164334	0.313866	0.780768	-0.466902	1.31533e-06	3.35475e-05	LOC100128554	TSS200	opensea
1039	cg21194517	0.668587	0.201704	0.466883	6.07966e-05	0.000842064	WNK2	Body	shelf
1040	cg01917259	0.81349	0.346633	0.466857	1.58881e-08	7.82398e-07	INPP5B	TSS1500	opensea
1041	cg18741958	0.86155	0.394742	0.466808	1.77301e-12	3.0933e-10	SLC12A8	Body	opensea
1042	cg16017979	0.864858	0.398189	0.46667	6.52109e-07	1.8562e-05	STAU2	3'UTR	opensea
1043	cg03940776	0.631325	0.164683	0.466641	5.3239e-07	1.56449e-05	SYNJ2	Body	opensea
1044	cg27579233	0.825585	0.359014	0.466572	1.10941e-07	4.12817e-06	ZBTB40	Body	opensea
1045	cg18438894	0.744639	0.278225	0.466414	7.65297e-09	4.19842e-07	C1orf21	5'UTR	opensea
1046	cg22912095	0.89544	0.429134	0.466306	1.1366e-11	1.53541e-09	ZNRF3	5'UTR	shore
1047	cg03226958	0.680323	0.214073	0.46625	2.35972e-07	7.83464e-06	LIN28	TSS1500	shore
1048	cg14684434	0.799963	0.33384	0.466123	6.2917e-08	2.5458e-06	SNX18	Body	opensea
1049	cg18397073	0.81944	0.353537	0.465903	3.37909e-07	1.06371e-05	POU2F2	Body	island
1050	cg05576245	0.70549	0.239632	0.465858	1.58033e-07	5.57922e-06	ZC3HAV1L	Body	shore
1051	cg20293725	0.658592	0.192754	0.465838	2.67469e-06	6.12604e-05	C7orf50	Body	shore
1052	cg14689515	0.782164	0.316389	0.465775	1.07685e-07	4.02944e-06	CSRNP1	5'UTR	shelf
1053	cg13408795	0.854583	0.388834	0.465749	8.67543e-13	1.66667e-10	SLC9A9	Body	opensea
1054	cg21691367	0.816133	0.350729	0.465404	7.54587e-06	0.000146201	MTHFD1L	Body	opensea
1055	cg08958168	0.763466	0.29814	0.465326	2.82282e-10	2.43867e-08	SLC12A4	Body	shore
1056	cg07102368	0.683426	0.218118	0.465307	2.0187e-07	6.87689e-06	C15orf27	Body	opensea
1057	cg24364535	0.675697	0.210411	0.465285	4.20277e-06	8.96146e-05	OPCML	Body	opensea
1058	cg09650907	0.600816	0.135671	0.465144	3.8874e-05	0.000579486	FAM104A	Body	shelf
1059	cg12397274	0.253579	0.718666	-0.465087	6.9413e-07	1.95703e-05	TINAG	TSS1500	opensea
1060	cg09010107	0.269027	0.73405	-0.465023	1.77657e-05	0.000299413	PRRX1	Body	opensea
1061	cg08033551	0.352736	0.817611	-0.464875	0.000128431	0.0015766	CYP11A1	5'UTR	shore
1062	cg02959939	0.835792	0.371095	0.464696	7.74448e-10	5.80963e-08	PCNT	Body	shore
1063	cg10366093	0.623795	0.159149	0.464647	5.0342e-06	0.000104256	YPEL4	Body	island
1064	cg19420604	0.887962	0.423497	0.464465	2.67679e-09	1.70486e-07	MARCH10	Body	opensea
1065	cg16255816	0.829404	0.364951	0.464453	5.37926e-08	2.22805e-06	HAP1	Body	shore
1066	cg00883689	0.940381	0.476051	0.46433	3.38657e-14	1.05459e-11	SPTBN1	Body	opensea
1067	cg05129050	0.627858	0.163559	0.464299	6.75382e-06	0.00013326	CAMTA1	Body	opensea
1068	cg15896259	0.568968	0.104716	0.464252	5.01651e-05	0.000716839	ENTPD4	5'UTR	shelf
1069	cg25461186	0.262014	0.726175	-0.464161	1.3496e-06	3.42748e-05	MLXIP	Body	shore
1070	cg05033239	0.731154	0.267194	0.46396	5.99493e-06	0.000120489	GPR98	Body	opensea
1071	cg16559243	0.879722	0.41582	0.463902	4.53606e-13	9.62464e-11	EGFLAM	TSS200	opensea
1072	cg16615829	0.622154	0.158257	0.463897	1.16773e-08	5.99575e-07	HSPB6	3'UTR	island
1073	cg07452312	0.817346	0.353493	0.463853	3.71077e-07	1.15133e-05	GALNT10	Body	opensea
1074	cg00615485	0.800194	0.336349	0.463845	6.28176e-09	3.54878e-07	CHN2	5'UTR	opensea
1075	cg01543184	0.614531	0.150855	0.463676	7.67889e-05	0.00102286	MAFG	5'UTR	shore
1076	cg12498181	0.822774	0.359134	0.463639	8.33455e-13	1.6152e-10	ATP11A	Body	shelf
1077	cg02309655	0.885491	0.421896	0.463595	7.07274e-15	2.83981e-12	GNG7	5'UTR	shore
1078	cg22213445	0.867684	0.404214	0.463471	6.22265e-10	4.78955e-08	RAB7A	5'UTR	opensea
1079	cg18059933	0.663909	0.200467	0.463442	9.77645e-06	0.000181852	TP53INP1	TSS1500	shore
1080	cg03428047	0.620382	0.157306	0.463076	4.81798e-05	0.000693008	MAML3	Body	opensea
1081	cg05812089	0.65012	0.187053	0.463067	2.26648e-07	7.57359e-06	LOC100126784	TSS1500	shore
1082	cg24251035	0.636088	0.173114	0.462974	4.24996e-06	9.04535e-05	ZC3HAV1L	TSS1500	shore
1083	cg24581657	0.708186	0.24526	0.462925	3.33415e-07	1.05159e-05	ANGPT4	Body	shore
1084	cg19776942	0.766671	0.303763	0.462908	1.83736e-07	6.34982e-06	FAM167B	Body	island
1085	cg01254505	0.740298	0.277427	0.462871	1.74543e-06	4.26543e-05	BST2	TSS200	opensea
1086	cg17024199	0.805879	0.343166	0.462713	2.97664e-07	9.53504e-06	MGAT5B	Body	shelf
1087	cg23732608	0.81229	0.349601	0.462689	1.09594e-06	2.88119e-05	C20orf26	Body	opensea
1088	cg00499837	0.807716	0.345047	0.462668	2.3335e-10	2.05955e-08	PVRL1	Body	opensea
1089	cg05797623	0.825349	0.362698	0.462651	1.19898e-06	3.10803e-05	ADAMTS3	Body	opensea
1090	cg01024458	0.844086	0.381465	0.462621	1.10501e-05	0.000201403	RERE	Body	opensea
1091	cg24242280	0.893232	0.430635	0.462598	1.07666e-12	2.01657e-10	ZFAND3	Body	opensea
1092	cg13868473	0.915444	0.452852	0.462592	2.69262e-12	4.43207e-10	MAD1L1	Body	shore
1093	cg23920953	0.734515	0.271963	0.462551	1.11668e-07	4.15183e-06	C14orf162	TSS1500	island
1094	cg15551096	0.72915	0.266746	0.462404	1.02692e-06	2.72805e-05	RPS6KA2	Body	opensea
1095	cg19668315	0.886895	0.424518	0.462377	1.04804e-13	2.81088e-11	EFNA5	Body	opensea
1096	cg06719334	0.35835	0.8206	-0.46225	1.44784e-05	0.000251857	A2BP1	Body	opensea
1097	cg00583328	0.722335	0.260303	0.462032	4.27101e-07	1.29723e-05	ANK1	Body	island
1098	cg23251296	0.847196	0.385167	0.462029	2.72114e-16	1.9172e-13	CD79B	TSS1500	opensea
1099	cg03836586	0.777593	0.315715	0.461879	6.62888e-05	0.000905528	NXPH1	Body	shelf
1100	cg05802386	0.919976	0.458162	0.461814	9.31818e-15	3.54594e-12	SLC2A1	Body	shore
1101	cg07168526	0.737177	0.275575	0.461603	0.00034216	0.00357066	ST7	Body	opensea
1102	cg01435109	0.753156	0.291566	0.46159	1.38736e-07	4.99171e-06	LUZP1	TSS1500	opensea
1103	cg00393992	0.243917	0.705493	-0.461576	1.1804e-06	3.06826e-05	CABP1	Body	shelf
1104	cg13234062	0.62787	0.166311	0.461559	2.49385e-07	8.20987e-06	FOSL1	TSS1500	shore
1105	cg26422861	0.623113	0.161616	0.461497	2.35351e-06	5.49816e-05	PHKG1	TSS200	opensea
1106	cg04366300	0.80451	0.343287	0.461223	2.5061e-13	5.90252e-11	PKNOX2	5'UTR	opensea
1107	cg26787199	0.740428	0.279279	0.461149	3.61456e-09	2.20836e-07	SYNGR3	3'UTR	shore
1108	cg06964608	0.689711	0.228592	0.461119	4.90952e-06	0.000102105	C1orf94	5'UTR	shelf
1109	cg15636295	0.855849	0.394926	0.460923	8.09691e-08	3.15417e-06	HBEGF	Body	shore
1110	cg12658929	0.85095	0.390223	0.460727	8.66827e-08	3.34829e-06	CARKD	Body	shelf
1111	cg04678141	0.861949	0.401223	0.460726	5.19765e-15	2.18365e-12	SVIL	TSS200	opensea
1112	cg11959694	0.824343	0.363618	0.460725	1.47345e-06	3.69736e-05	CNGA3	TSS200	shore
1113	cg27018424	0.652888	0.192233	0.460656	5.74083e-07	1.66791e-05	HSD17B8	Body	shore
1114	cg12142354	0.587267	0.126836	0.460431	4.01944e-05	0.000595578	CMKLR1	TSS200	opensea
1115	cg06585203	0.766018	0.305626	0.460392	4.42838e-06	9.35724e-05	EZR	Body	shore
1116	cg05599550	0.533537	0.0731563	0.460381	3.68947e-05	0.000554276	ABCC3	TSS1500	shore
1117	cg14416623	0.80213	0.341761	0.460369	3.26403e-05	0.000500236	NCKAP5	Body	opensea
1118	cg12399536	0.628894	0.168579	0.460315	1.72322e-05	0.000291907	TEAD1	Body	opensea
1119	cg01267797	0.579577	0.119311	0.460266	2.19312e-06	5.17714e-05	SERINC5	Body	opensea
1120	cg22689630	0.759155	0.298946	0.46021	7.43604e-07	2.07274e-05	KLK13	TSS1500	shore
1121	cg02001060	0.810889	0.35073	0.460159	3.86055e-05	0.000576053	EXPH5	Body	opensea
1122	cg01412762	0.830557	0.370419	0.460138	1.62936e-10	1.52066e-08	ALK	Body	opensea
1123	cg03976172	0.463579	0.923703	-0.460124	1.38555e-05	0.000242897	ZFPM2	Body	opensea
1124	cg20163667	0.50363	0.96375	-0.46012	6.61873e-05	0.000904323	RASAL2	Body	opensea
1125	cg06733155	0.793147	0.333081	0.460067	3.5761e-08	1.56763e-06	LIMK1	Body	opensea
1126	cg26094599	0.72875	0.268786	0.459963	2.86879e-09	1.80824e-07	WNT10A	Body	island
1127	cg02066936	0.901625	0.441798	0.459827	2.2512e-07	7.52996e-06	SSBP3	Body	opensea
1128	cg03801871	0.687256	0.227504	0.459753	1.2415e-05	0.000221789	LBH	TSS1500	shore
1129	cg26036018	0.838512	0.378789	0.459723	1.55192e-13	3.91763e-11	AK3L1	Body	opensea
1130	cg23731089	0.748349	0.288645	0.459705	6.16063e-08	2.50215e-06	EIF2C2	Body	opensea
1131	cg09664216	0.791435	0.331828	0.459607	1.46908e-07	5.24409e-06	HDAC4	Body	opensea
1132	cg26547698	0.823247	0.363669	0.459578	4.83846e-15	2.0539e-12	ANKRD11	5'UTR	shore
1133	cg16401270	0.607404	0.147885	0.459518	7.46571e-06	0.000144854	PTP4A2	TSS1500	shore
1134	cg17499251	0.741846	0.282336	0.45951	7.36909e-08	2.91434e-06	THEG	Body	shelf
1135	cg12639453	0.842419	0.382933	0.459486	9.60635e-11	9.60727e-09	PRKCZ	TSS1500	shelf
1136	cg10947611	0.865333	0.405948	0.459385	2.122e-09	1.39284e-07	HDAC4	Body	opensea
1137	cg26703880	0.806241	0.346869	0.459372	7.57979e-08	2.98349e-06	ODZ4	Body	opensea
1138	cg17753124	0.894825	0.435531	0.459293	1.60954e-14	5.67007e-12	IER2	TSS1500	shore
1139	cg08162124	0.942415	0.483126	0.459289	4.80563e-17	4.65654e-14	ATP11A	Body	shore
1140	cg25298189	0.666074	0.206916	0.459158	2.49118e-06	5.77316e-05	ARID3A	Body	shelf
1141	cg26530485	0.809304	0.350172	0.459132	2.41212e-07	7.98245e-06	LUZP1	TSS1500	opensea
1142	cg04913974	0.872025	0.412896	0.459129	1.72505e-14	5.98709e-12	SLC35F4	TSS200	opensea
1143	cg27024992	0.515361	0.0563083	0.459053	1.18011e-05	0.000212677	FBXO11	5'UTR	opensea
1144	cg07768763	0.340306	0.799323	-0.459017	1.85211e-05	0.000310082	GCSH	3'UTR	opensea
1145	cg06682024	0.654437	0.195431	0.459007	1.3993e-05	0.000244802	MERTK	Body	opensea
1146	cg00156427	0.787998	0.329005	0.458993	4.57839e-09	2.69887e-07	THY1	TSS200	shore
1147	cg10622644	0.803329	0.344348	0.458981	9.23263e-07	2.48982e-05	VPS13D	Body	opensea
1148	cg15474337	0.338512	0.797417	-0.458905	3.28671e-06	7.27023e-05	NAPSB	TSS1500	opensea
1149	cg05824218	0.643512	0.184662	0.45885	1.44043e-05	0.00025075	RARA	1stExon	shore
1150	cg23532454	0.876119	0.417285	0.458834	1.34954e-08	6.79162e-07	JDP2	Body	opensea
1151	cg20435097	0.833629	0.37485	0.458779	7.13107e-07	2.00235e-05	FAM53B	Body	opensea
1152	cg23402541	0.649202	0.190423	0.458779	5.86419e-06	0.000118304	HTRA1	Body	opensea
1153	cg05989312	0.17864	0.637273	-0.458632	2.52917e-11	3.03723e-09	GCOM1	Body	shelf
1154	cg02556634	0.707056	0.248437	0.458619	7.04078e-09	3.91469e-07	PPP2R2C	Body	opensea
1155	cg03835292	0.4637	0.922314	-0.458614	8.0941e-05	0.00106851	LGALS2	TSS1500	opensea
1156	cg15328703	0.392134	0.850747	-0.458613	5.6796e-06	0.00011515	TMEM132B	3'UTR	opensea
1157	cg14053030	0.783089	0.324511	0.458578	2.44103e-09	1.57252e-07	SIGLEC15	TSS200	opensea
1158	cg09784347	0.761708	0.303154	0.458554	2.09457e-06	4.98057e-05	IQCJ	TSS200	opensea
1159	cg21625464	0.600726	0.142177	0.458549	4.92075e-06	0.000102308	IFITM1	1stExon	shore
1160	cg13845351	0.872928	0.414466	0.458462	3.06601e-11	3.58586e-09	EPB41L4B	Body	opensea
1161	cg22308970	0.928991	0.47056	0.458431	1.80174e-15	8.81295e-13	AMPH	Body	opensea
1162	cg25450266	0.684309	0.226015	0.458294	2.77665e-06	6.31385e-05	GRAMD1A	Body	shelf
1163	cg03967627	0.731304	0.273108	0.458195	1.45731e-06	3.66179e-05	C8orf73	TSS200	shore
1164	cg01276497	0.851389	0.393257	0.458132	1.93757e-10	1.75529e-08	C11orf91	TSS1500	shore
1165	cg25387624	0.744916	0.28686	0.458057	6.55882e-07	1.86414e-05	LARP1	Body	shore
1166	cg26090940	0.841231	0.383197	0.458034	5.15667e-08	2.14803e-06	SLC16A7	Body	opensea
1167	cg04211829	0.89771	0.439689	0.458021	1.25723e-11	1.67605e-09	ZFHX3	Body	opensea
1168	cg16784745	0.912981	0.455	0.457981	2.51536e-12	4.17799e-10	MIR148B	Body	opensea
1169	cg01099024	0.835909	0.377966	0.457943	5.62424e-07	1.63929e-05	SMOC1	Body	shore
1170	cg10123654	0.581561	0.123726	0.457835	3.42354e-06	7.52678e-05	ADCY9	Body	shelf
1171	cg12251075	0.792114	0.334282	0.457833	8.77947e-08	3.38387e-06	NME2	Body	shore
1172	cg13538006	0.784153	0.326352	0.4578	1.05511e-07	3.95897e-06	NINJ1	TSS1500	shore
1173	cg00175150	0.903055	0.445282	0.457773	1.72641e-18	3.75984e-15	ECM1	3'UTR	shore
1174	cg13030582	0.716044	0.258353	0.457691	9.83338e-09	5.18204e-07	MFAP4	TSS1500	opensea
1175	cg15843262	0.656087	0.19847	0.457617	2.45217e-06	5.697e-05	DNMT3A	Body	shore
1176	cg04812351	0.814093	0.35671	0.457383	7.74095e-07	2.14294e-05	ADAMTS3	Body	opensea
1177	cg26262576	0.639855	0.182476	0.457379	5.61854e-06	0.00011419	ZMYM5	Body	opensea
1178	cg07964754	0.778328	0.320968	0.45736	3.98228e-06	8.56005e-05	COTL1	Body	shore
1179	cg23930334	0.609095	0.15176	0.457335	0.000448253	0.00447079	SLC22A20	Body	island
1180	cg00371061	0.902366	0.445125	0.45724	9.441e-10	6.88479e-08	HPCAL1	5'UTR	opensea
1181	cg10689409	0.222644	0.679835	-0.457191	2.12823e-07	7.19413e-06	OR9I1	TSS1500	opensea
1182	cg21912556	0.673919	0.216741	0.457179	0.000120773	0.0014963	PSD3	Body	opensea
1183	cg15209053	0.384428	0.841593	-0.457165	9.81601e-05	0.00125674	GRID1	Body	opensea
1184	cg06484274	0.760621	0.303511	0.45711	0.000232209	0.002584	XRN1	Body	shore
1185	cg12756527	0.842237	0.385177	0.457059	6.6005e-06	0.000130672	CUGBP2	Body	opensea
1186	cg25407528	0.806064	0.349034	0.45703	2.7366e-06	6.23773e-05	SPTBN1	Body	opensea
1187	cg19560014	0.724941	0.267926	0.457016	1.62864e-10	1.52034e-08	C12orf72	TSS1500	opensea
1188	cg00162231	0.513852	0.0569474	0.456905	8.73659e-05	0.00113996	SLC6A1	5'UTR	island
1189	cg24135793	0.36827	0.824993	-0.456723	2.92362e-07	9.38953e-06	NFIX	Body	island
1190	cg18625627	0.806157	0.349543	0.456614	1.61839e-07	5.69534e-06	TSHR	Body	opensea
1191	cg05438378	0.794741	0.338189	0.456552	1.02566e-07	3.8634e-06	SMAD3	Body	opensea
1192	cg03827626	0.58542	0.128907	0.456513	0.000121965	0.00150853	SOX2	3'UTR	shore
1193	cg12664938	0.40663	0.863141	-0.456511	2.24274e-06	5.27504e-05	LRRK2	Body	shelf
1194	cg04216240	0.292816	0.749322	-0.456505	1.01871e-05	0.000188202	RHOD	TSS1500	shore
1195	cg23901918	0.797053	0.340551	0.456502	1.07755e-07	4.03056e-06	SH3PXD2A	Body	island
1196	cg10639368	0.827255	0.3708	0.456456	1.63635e-08	8.02321e-07	HDAC4	Body	opensea
1197	cg07970752	0.821708	0.365257	0.456451	2.0886e-10	1.87257e-08	MSLN	Body	opensea
1198	cg24425171	0.63481	0.178424	0.456385	1.57821e-06	3.91806e-05	POMC	TSS200	island
1199	cg04589761	0.830914	0.374542	0.456371	5.83928e-13	1.19354e-10	DGKG	Body	opensea
1200	cg23848712	0.673549	0.217193	0.456356	0.000129674	0.00158932	GNRH2	TSS1500	shelf
1201	cg02423105	0.772621	0.316365	0.456256	5.92205e-09	3.37219e-07	CDH26	Body	opensea
1202	cg23733260	0.840471	0.384231	0.45624	1.71272e-07	5.97986e-06	BBX	5'UTR	opensea
1203	cg10989317	0.895647	0.439434	0.456213	8.27978e-09	4.47667e-07	UBTD1	Body	opensea
1204	cg14212190	0.545889	0.0896855	0.456204	7.17774e-07	2.01297e-05	CD97	TSS200	opensea
1205	cg11534680	0.814133	0.35793	0.456202	3.66332e-07	1.13895e-05	GREB1	5'UTR	opensea
1206	cg24830241	0.869584	0.413487	0.456098	2.91048e-15	1.31922e-12	MYL10	Body	opensea
1207	cg10275917	0.825315	0.369359	0.455956	1.50049e-08	7.45292e-07	COL28A1	Body	opensea
1208	cg04977618	0.870635	0.414861	0.455774	1.47092e-12	2.62947e-10	CDH11	5'UTR	opensea
1209	cg21361094	0.762924	0.307217	0.455708	8.26974e-09	4.47183e-07	B4GALNT1	Body	island
1210	cg07360805	0.746496	0.290799	0.455697	5.22187e-05	0.000741035	BLCAP	5'UTR	shore
1211	cg15084851	0.836936	0.381297	0.455639	2.32595e-10	2.05601e-08	EIF2C4	Body	opensea
1212	cg21340621	0.675726	0.220105	0.455621	2.84666e-07	9.17705e-06	KDM2B	TSS1500	shore
1213	cg25711003	0.820594	0.365022	0.455572	4.69028e-07	1.4045e-05	PHLDB2	5'UTR	opensea
1214	cg18071348	0.266088	0.721518	-0.45543	6.2303e-07	1.78607e-05	LOC285692	Body	opensea
1215	cg03202732	0.822655	0.36726	0.455395	2.45e-07	8.09142e-06	MARK2	TSS1500	opensea
1216	cg16999254	0.588025	0.132636	0.45539	0.000484166	0.0047687	RGR	Body	opensea
1217	cg14737484	0.216245	0.671609	-0.455364	9.7768e-08	3.70698e-06	TNXB	Body	shore
1218	cg14847626	0.62878	0.173493	0.455287	2.47422e-07	8.15884e-06	NCOR2	Body	shore
1219	cg02455346	0.437731	0.89292	-0.455188	0.00012589	0.00154984	HLX	Body	shore
1220	cg14807446	0.856666	0.401654	0.455011	4.60954e-07	1.38418e-05	THADA	Body	opensea
1221	cg21464975	0.853636	0.398642	0.454993	3.33932e-07	1.05273e-05	MARCH10	Body	opensea
1222	cg15453278	0.778111	0.323164	0.454946	3.86029e-08	1.6703e-06	CLCF1	Body	opensea
1223	cg25072262	0.868875	0.413973	0.454902	2.12213e-10	1.89805e-08	RNF213	Body	opensea
1224	cg03621841	0.62126	0.166374	0.454886	5.652e-05	0.000791728	ZNF423	Body	shore
1225	cg27470486	0.60509	0.150267	0.454823	2.69838e-06	6.16939e-05	ACLY	5'UTR	shore
1226	cg11828203	0.769535	0.314717	0.454818	1.6599e-07	5.82386e-06	GHRHR	Body	opensea
1227	cg12361744	0.738446	0.283655	0.454791	7.88097e-07	2.1755e-05	CPNE4	Body	opensea
1228	cg01723148	0.79624	0.3415	0.454741	1.14468e-09	8.11679e-08	B4GALNT1	Body	island
1229	cg25247837	0.803715	0.348977	0.454738	1.26275e-06	3.24422e-05	SBF2	Body	opensea
1230	cg18192083	0.666524	0.211801	0.454723	9.49643e-09	5.03178e-07	KCNAB2	TSS200	island
1231	cg04522984	0.785066	0.330387	0.454679	1.23783e-09	8.69358e-08	ANK2	Body	opensea
1232	cg03839782	0.830018	0.375457	0.454562	1.76003e-07	6.11781e-06	FAM65B	5'UTR	opensea
1233	cg04270048	0.764847	0.310295	0.454552	1.01427e-06	2.6992e-05	TP53INP2	Body	island
1234	cg20297544	0.562494	0.107943	0.454552	0.000123003	0.00151915	EPHB2	Body	opensea
1235	cg14134732	0.594775	0.140279	0.454495	7.9963e-07	2.20346e-05	CCDC64B	Body	island
1236	cg26475094	0.40244	0.856874	-0.454435	2.86399e-05	0.000447449	MIR138-2	TSS1500	opensea
1237	cg18590335	0.661955	0.207526	0.454428	1.76129e-06	4.29596e-05	CACNB1	3'UTR	shore
1238	cg15766101	0.811865	0.357449	0.454416	4.005e-08	1.72414e-06	CCDC61	Body	island
1239	cg03043696	0.675776	0.221447	0.454329	8.54086e-07	2.32991e-05	GNB1	5'UTR	shore
1240	cg04850286	0.742971	0.28868	0.454291	8.31277e-07	2.2782e-05	PLAC9	Body	shelf
1241	cg04152622	0.915623	0.461355	0.454268	7.3934e-15	2.92491e-12	RBM25	3'UTR	opensea
1242	cg24836826	0.749129	0.294953	0.454176	7.36143e-05	0.000987432	NCOR2	Body	island
1243	cg25585967	0.906226	0.452085	0.454142	4.57986e-13	9.6954e-11	TRIO	Body	opensea
1244	cg02760280	0.919631	0.465574	0.454058	2.61058e-16	1.8521e-13	RAP1GAP	5'UTR	shore
1245	cg19998294	0.79875	0.344709	0.454041	8.2482e-07	2.2637e-05	CACNB2	Body	opensea
1246	cg11383291	0.770479	0.316447	0.454032	4.55462e-11	5.03253e-09	ITGB5	Body	opensea
1247	cg25418001	0.759542	0.305562	0.45398	8.99648e-10	6.60193e-08	GNAI1	Body	opensea
1248	cg26226650	0.724218	0.270313	0.453906	1.35396e-05	0.000238238	GNAI2	Body	shore
1249	cg21464220	0.751078	0.297182	0.453896	5.45557e-06	0.000111545	HDLBP	5'UTR	opensea
1250	cg03259742	0.827321	0.37345	0.453871	1.07419e-08	5.60294e-07	LYRM5	5'UTR	opensea
1251	cg01223193	0.203737	0.657596	-0.453858	1.93146e-07	6.63453e-06	MRPL46	3'UTR	opensea
1252	cg01041405	0.867949	0.414102	0.453847	3.74175e-09	2.27313e-07	SMPD3	5'UTR	opensea
1253	cg23728447	0.784873	0.331101	0.453772	1.39805e-05	0.000244615	FAM53B	5'UTR	shelf
1254	cg25743622	0.481015	0.93473	-0.453715	0.000109188	0.00137353	SUSD4	Body	opensea
1255	cg26632171	0.244101	0.697762	-0.453661	1.47585e-07	5.26548e-06	MSGN1	TSS1500	opensea
1256	cg05384697	0.210119	0.663741	-0.453622	9.26373e-08	3.54108e-06	TMEM132D	Body	opensea
1257	cg22766080	0.586121	0.132512	0.453609	4.34367e-05	0.000635268	NEFH	TSS1500	shore
1258	cg15494458	0.775107	0.321503	0.453605	3.62078e-07	1.12799e-05	BPI	TSS1500	opensea
1259	cg02627403	0.631397	0.177796	0.4536	5.79627e-07	1.6815e-05	UNC13D	3'UTR	opensea
1260	cg02336827	0.702893	0.249312	0.453581	2.67021e-07	8.69963e-06	LIMD1	TSS200	shore
1261	cg04865290	0.840925	0.387401	0.453524	6.57587e-10	5.0301e-08	TMEM110	Body	shelf
1262	cg08702941	0.887301	0.433812	0.45349	1.2709e-15	6.71566e-13	BEND4	TSS1500	shore
1263	cg23018755	0.630592	0.177235	0.453357	2.51739e-05	0.000401275	MAFG	5'UTR	shore
1264	cg11825603	0.698555	0.245281	0.453273	1.6401e-05	0.000280001	LUZP1	5'UTR	opensea
1265	cg01770948	0.892163	0.439037	0.453126	1.16635e-08	5.99017e-07	RAB40C	Body	shore
1266	cg15006175	0.795678	0.3426	0.453078	4.01536e-08	1.72769e-06	KIFC2	Body	island
1267	cg00582562	0.614246	0.161185	0.453061	5.28198e-05	0.000748013	SKAP1	Body	opensea
1268	cg07658702	0.835446	0.382465	0.452982	1.6753e-09	1.13431e-07	MGC14436	Body	opensea
1269	cg19980260	0.67772	0.224757	0.452964	1.30187e-06	3.32759e-05	FNDC3B	Body	opensea
1270	cg16465882	0.900116	0.447178	0.452937	1.11396e-15	6.05905e-13	IQCD	3'UTR	opensea
1271	cg10791541	0.72491	0.271989	0.452921	1.78093e-06	4.33662e-05	CACNA2D3	Body	opensea
1272	cg03607708	0.269562	0.722475	-0.452913	4.248e-07	1.29178e-05	USH2A	Body	opensea
1273	cg25426807	0.291724	0.744631	-0.452906	3.98489e-06	8.56521e-05	OR11A1	1stExon	opensea
1274	cg09504092	0.551008	0.098119	0.452889	7.99954e-06	0.000153554	INTS7	Body	opensea
1275	cg11773456	0.872966	0.420108	0.452858	5.37319e-11	5.8126e-09	CCDC85C	Body	opensea
1276	cg07180649	0.566756	0.113918	0.452838	4.51244e-05	0.00065614	WNT4	TSS1500	shore
1277	cg07207982	0.887187	0.434354	0.452833	8.82435e-08	3.3986e-06	ANKS1A	Body	opensea
1278	cg06736134	0.471353	0.924158	-0.452804	0.00014312	0.00172408	JAKMIP2	Body	opensea
1279	cg26509318	0.756796	0.304045	0.452751	2.99339e-07	9.58117e-06	KDM2B	TSS1500	shore
1280	cg00164949	0.63474	0.182019	0.452721	2.21364e-05	0.000360444	C1QL1	3'UTR	island
1281	cg19812613	0.487842	0.940515	-0.452673	0.000102189	0.00130003	GUCA1C	TSS200	opensea
1282	cg22396850	0.68874	0.236137	0.452604	2.78831e-08	1.26638e-06	AARSD1	3'UTR	opensea
1283	cg20316614	0.690332	0.237756	0.452576	1.34755e-06	3.42269e-05	TMEM63A	5'UTR	shelf
1284	cg08158518	0.945821	0.493245	0.452575	1.18071e-16	9.7437e-14	SPSB4	3'UTR	opensea
1285	cg08447324	0.681548	0.2291	0.452448	1.64361e-05	0.000280459	SHANK1	Body	island
1286	cg05548945	0.901174	0.448733	0.452442	2.50087e-08	1.15368e-06	LPP	Body	opensea
1287	cg03048372	0.893363	0.440953	0.452409	3.4161e-12	5.42031e-10	NCOR2	Body	island
1288	cg24626752	0.429482	0.881834	-0.452352	0.000298452	0.00318957	SLITRK5	Body	shore
1289	cg09631880	0.64081	0.188474	0.452336	1.71355e-06	4.20117e-05	CRADD	Body	opensea
1290	cg00225067	0.935721	0.483445	0.452276	7.51235e-17	6.73534e-14	LIMD1	Body	opensea
1291	cg03714916	0.717822	0.265605	0.452217	2.99797e-07	9.59357e-06	CDKN1A	TSS1500	shore
1292	cg17587997	0.94384	0.491645	0.452195	1.29972e-13	3.35933e-11	FYN	5'UTR	opensea
1293	cg24261767	0.468828	0.92101	-0.452182	5.91046e-05	0.00082223	FAT1	Body	opensea
1294	cg16022049	0.720289	0.268181	0.452107	2.78552e-05	0.000436796	EMP1	5'UTR	opensea
1295	cg25121227	0.647908	0.195959	0.451949	9.12885e-05	0.00118241	GTF3A	Body	shore
1296	cg25809290	0.251462	0.703374	-0.451912	3.36155e-06	7.41098e-05	PAX3	Body	shore
1297	cg26784822	0.820604	0.368697	0.451907	1.8911e-06	4.56657e-05	RND3	Body	shore
1298	cg08455936	0.9562	0.504338	0.451862	2.83448e-18	5.25588e-15	KIAA0556	Body	opensea
1299	cg06710785	0.362084	0.813895	-0.451812	1.56916e-06	3.90032e-05	NRG3	Body	opensea
1300	cg17944003	0.866754	0.414948	0.451806	7.01156e-10	5.32246e-08	NDUFAF2	Body	opensea
1301	cg26974444	0.867216	0.415461	0.451755	1.07146e-13	2.85494e-11	SNX29	Body	shelf
1302	cg06531741	0.870108	0.418354	0.451753	5.84928e-10	4.54765e-08	HTR3B	TSS200	opensea
1303	cg18486150	0.743048	0.291356	0.451691	1.53561e-07	5.44917e-06	KIF17	TSS1500	shore
1304	cg16769791	0.22579	0.677432	-0.451642	2.01557e-07	6.86793e-06	RALYL	5'UTR	opensea
1305	cg00494337	0.556832	0.105208	0.451624	0.000192844	0.0022144	ID1	3'UTR	island
1306	cg08080735	0.775552	0.323951	0.451601	6.82584e-08	2.73522e-06	FOXP1	5'UTR	opensea
1307	cg04917208	0.854335	0.402792	0.451543	1.19566e-09	8.43579e-08	IL34	TSS1500	opensea
1308	cg14227460	0.716517	0.264983	0.451534	2.72479e-07	8.84288e-06	PLIN4	TSS1500	opensea
1309	cg03883275	0.732947	0.281458	0.451489	3.3321e-08	1.47669e-06	MAPK8	TSS1500	opensea
1310	cg11210878	0.819112	0.367653	0.451459	1.14371e-07	4.23801e-06	CHRM1	TSS200	shore
1311	cg27398499	0.777127	0.325742	0.451385	3.23629e-07	1.02501e-05	TACSTD2	TSS1500	shore
1312	cg03664994	0.909013	0.457631	0.451382	1.34374e-16	1.07064e-13	RTN4	Body	opensea
1313	cg09967633	0.828203	0.376857	0.451346	6.58948e-08	2.65152e-06	CRISPLD2	Body	opensea
1314	cg20285026	0.903282	0.451968	0.451314	3.08563e-11	3.60467e-09	PRKCZ	Body	shore
1315	cg27544673	0.680916	0.229684	0.451232	3.5957e-06	7.8538e-05	CLRN3	Body	opensea
1316	cg00848945	0.666855	0.215688	0.451167	2.28574e-05	0.000370237	CACNA1C	3'UTR	island
1317	cg03044471	0.845425	0.394327	0.451099	8.60595e-11	8.77238e-09	TOLLIP	Body	shelf
1318	cg21913301	0.284427	0.7355	-0.451073	1.19264e-06	3.09493e-05	PDE3A	Body	opensea
1319	cg18622870	0.689737	0.238675	0.451062	2.30248e-07	7.6738e-06	SYT7	Body	island
1320	cg05473387	0.77686	0.32582	0.45104	7.873e-07	2.17374e-05	SCAP	5'UTR	opensea
1321	cg06730438	0.42262	0.873641	-0.451021	3.04627e-06	6.82611e-05	TLE3	Body	opensea
1322	cg17670366	0.499757	0.950751	-0.450994	4.75143e-05	0.000685031	JAKMIP2	Body	opensea
1323	cg19635897	0.762059	0.311187	0.450872	2.99452e-08	1.3461e-06	FMN1	TSS200	opensea
1324	cg08977627	0.394208	0.845071	-0.450863	5.54226e-06	0.000112989	MYO3B	Body	opensea
1325	cg14073716	0.696328	0.245497	0.450831	2.60777e-08	1.19596e-06	EEF1G	TSS1500	shore
1326	cg15119221	0.764496	0.313759	0.450737	6.98661e-08	2.78794e-06	MFAP4	TSS1500	opensea
1327	cg24754223	0.872382	0.421696	0.450686	7.99626e-14	2.1981e-11	PFKP	Body	opensea
1328	cg08091439	0.588916	0.138271	0.450645	0.000215156	0.00242594	AHCYL1	Body	opensea
1329	cg22283959	0.788981	0.33836	0.450621	8.29181e-05	0.00109062	NR2F2	Body	shelf
1330	cg18127648	0.946747	0.496141	0.450606	1.86354e-19	8.26316e-16	DLG5	Body	opensea
1331	cg11967108	0.895798	0.445222	0.450576	2.15338e-09	1.41139e-07	MAML3	Body	opensea
1332	cg11611244	0.79114	0.340616	0.450524	1.98054e-08	9.47286e-07	HCCA2	Body	opensea
1333	cg02375503	0.752653	0.302149	0.450504	2.32904e-07	7.75095e-06	PAQR5	TSS200	shore
1334	cg02332073	0.765584	0.315139	0.450445	2.35756e-07	7.82984e-06	TSGA13	TSS1500	opensea
1335	cg16596440	0.880209	0.429772	0.450437	1.8046e-11	2.27845e-09	MAML3	Body	opensea
1336	cg03635766	0.838698	0.388309	0.45039	3.64599e-09	2.22223e-07	IGFBP4	Body	opensea
1337	cg25547580	0.6575	0.207134	0.450366	2.69948e-05	0.000425249	ONECUT2	1stExon	island
1338	cg11125249	0.906307	0.455982	0.450325	1.7885e-14	6.14906e-12	GYG1	Body	opensea
1339	cg09517873	0.654013	0.2037	0.450313	1.76078e-06	4.29496e-05	DHRS3	Body	shore
1340	cg07138962	0.839954	0.389852	0.450102	2.32817e-06	5.44457e-05	CCDC85C	Body	opensea
1341	cg19700872	0.53926	0.0891606	0.450099	0.000132037	0.00161349	GPR151	TSS200	opensea
1342	cg01803886	0.627826	0.177778	0.450048	0.000131719	0.00161042	CNTN4	Body	opensea
1343	cg01354782	0.869131	0.419137	0.449993	4.24559e-08	1.81367e-06	ITPR2	Body	opensea
1344	cg15611336	0.620335	0.170525	0.44981	1.12149e-05	0.000203977	RPP25	1stExon	island
1345	cg07395439	0.902792	0.453045	0.449747	1.96833e-12	3.3823e-10	ZFHX3	Body	opensea
1346	cg20667664	0.65166	0.202045	0.449614	4.29393e-05	0.000629301	NR1D1	Body	shore
1347	cg26295272	0.785591	0.335999	0.449592	3.08683e-07	9.83858e-06	FLNB	Body	opensea
1348	cg20672549	0.708654	0.259316	0.449338	9.86155e-07	2.63504e-05	IKZF4	3'UTR	shelf
1349	cg17986880	0.770307	0.320997	0.449311	1.06142e-06	2.80456e-05	GNAI1	3'UTR	opensea
1350	cg00472758	0.896183	0.446873	0.44931	4.22755e-11	4.71584e-09	TBC1D24	3'UTR	shelf
1351	cg10547908	0.804671	0.355371	0.4493	2.57805e-11	3.08775e-09	FAM174B	Body	opensea
1352	cg07507251	0.779772	0.330541	0.449231	3.17011e-09	1.97196e-07	NT5DC2	Body	island
1353	cg01051098	0.874133	0.424952	0.44918	7.09903e-11	7.41442e-09	LGALS3	Body	opensea
1354	cg03021329	0.525224	0.0760895	0.449134	0.000551203	0.00531013	ITGB5	Body	opensea
1355	cg14537247	0.717036	0.267923	0.449114	1.21381e-05	0.000217671	DENND1A	Body	opensea
1356	cg09127107	0.614108	0.165017	0.449091	2.97436e-06	6.68884e-05	SLC22A23	Body	opensea
1357	cg05822335	0.658815	0.209805	0.44901	4.47334e-06	9.43806e-05	FMO2	3'UTR	opensea
1358	cg12912920	0.887011	0.438007	0.449004	4.57938e-11	5.0544e-09	MAML3	Body	opensea
1359	cg21261709	0.88002	0.431038	0.448982	5.5524e-07	1.62101e-05	SRPK2	Body	shore
1360	cg01033299	0.805584	0.356652	0.448932	3.1775e-09	1.97535e-07	ITGB7	TSS200	opensea
1361	cg14020824	0.84646	0.397573	0.448887	8.95696e-07	2.42542e-05	FLJ20184	TSS1500	opensea
1362	cg03220447	0.590538	0.141683	0.448856	1.52093e-06	3.79803e-05	NAV2	Body	opensea
1363	cg19767020	0.764953	0.316128	0.448825	1.6587e-06	4.08704e-05	PBX1	Body	opensea
1364	cg21502466	0.542216	0.0934748	0.448741	0.00107443	0.00922739	GPR133	5'UTR	opensea
1365	cg02161084	0.711904	0.263169	0.448736	4.69473e-08	1.97991e-06	CD276	5'UTR	opensea
1366	cg08040395	0.728733	0.280008	0.448725	1.63789e-07	5.75652e-06	ENGASE	Body	opensea
1367	cg07966572	0.755858	0.307305	0.448552	5.32498e-08	2.20938e-06	ZNF777	TSS1500	shore
1368	cg12548824	0.833597	0.385113	0.448484	3.53808e-09	2.16649e-07	MTUS1	Body	opensea
1369	cg02535219	0.537067	0.0886031	0.448464	0.000196881	0.00225244	ZC3H7A	TSS1500	opensea
1370	cg24436196	0.825002	0.376689	0.448313	1.94028e-12	3.34113e-10	ERC2	Body	opensea
1371	cg22305516	0.692039	0.243754	0.448285	2.49195e-07	8.20685e-06	SH3GL1	Body	opensea
1372	cg06087255	0.770635	0.322398	0.448238	2.15017e-06	5.09263e-05	FAM135B	Body	opensea
1373	cg02971262	0.858282	0.410105	0.448177	1.21697e-15	6.50067e-13	C9orf139	5'UTR	island
1374	cg17678139	0.278262	0.72629	-0.448029	7.78206e-07	2.15271e-05	DLC1	Body	shelf
1375	cg08690876	0.803487	0.355485	0.448002	1.29629e-08	6.5617e-07	CYB5R3	5'UTR	opensea
1376	cg03469471	0.785605	0.337619	0.447986	1.20174e-09	8.47427e-08	NOS3	Body	shore
1377	cg17823346	0.867527	0.419557	0.44797	1.2909e-13	3.34816e-11	ZMIZ1	5'UTR	opensea
1378	cg01589587	0.649449	0.201483	0.447965	9.58826e-06	0.000178906	BATF	Body	opensea
1379	cg14115597	0.804017	0.356121	0.447895	6.87011e-09	3.83548e-07	SSBP2	Body	opensea
1380	cg03458096	0.210924	0.658803	-0.447879	1.01475e-07	3.82654e-06	DOCK1	Body	opensea
1381	cg00746143	0.674976	0.22711	0.447866	4.18602e-05	0.000616188	C3orf21	Body	opensea
1382	cg27106959	0.908667	0.460809	0.447858	9.271e-10	6.78021e-08	SRRM4	Body	opensea
1383	cg03771282	0.894545	0.446707	0.447838	4.11236e-10	3.37748e-08	ANKRD44	5'UTR	opensea
1384	cg20434586	0.77477	0.327022	0.447748	1.95573e-09	1.29663e-07	TTBK1	Body	island
1385	cg15926420	0.665437	0.217734	0.447703	4.32947e-09	2.57495e-07	CASQ1	TSS1500	opensea
1386	cg03547017	0.722842	0.275151	0.447691	3.63166e-07	1.13087e-05	LASP1	Body	opensea
1387	cg22212414	0.504237	0.056551	0.447686	0.000331543	0.0034807	IFNGR2	TSS200	shore
1388	cg24420432	0.800992	0.353341	0.447651	1.39297e-07	5.00878e-06	CUX1	Body	opensea
1389	cg01476242	0.940254	0.492664	0.44759	2.64713e-16	1.87152e-13	RPTOR	Body	shore
1390	cg14694205	0.801094	0.353506	0.447588	8.38946e-06	0.00015979	GMPS	Body	opensea
1391	cg12126990	0.882175	0.4346	0.447575	3.8975e-08	1.68408e-06	AFF3	Body	opensea
1392	cg27194211	0.699954	0.252478	0.447476	5.74167e-07	1.66803e-05	SMTNL2	Body	shelf
1393	cg27647667	0.503552	0.95092	-0.447368	3.8964e-05	0.000580636	ASAP2	Body	shore
1394	cg13597397	0.52259	0.0753019	0.447289	3.72451e-06	8.08909e-05	ASS1	5'UTR	shore
1395	cg27635485	0.890027	0.442793	0.447234	4.93021e-08	2.0664e-06	VEGFC	Body	opensea
1396	cg10188797	0.875337	0.428185	0.447152	7.91473e-09	4.31302e-07	TBC1D16	Body	shelf
1397	cg18121066	0.795977	0.348897	0.447079	2.94308e-05	0.000457772	TBCD	Body	shelf
1398	cg13753351	0.840379	0.393314	0.447065	2.09788e-10	1.87883e-08	PSMB7	Body	opensea
1399	cg19449565	0.585015	0.138162	0.446853	0.000375049	0.00385354	HDAC4	Body	opensea
1400	cg25607249	0.836572	0.389737	0.446836	1.25232e-08	6.37154e-07	SLC1A5	1stExon	shelf
1401	cg11908453	0.877397	0.430576	0.446821	2.89468e-09	1.82315e-07	HDLBP	5'UTR	shore
1402	cg03723716	0.867436	0.420745	0.446691	3.60658e-08	1.57888e-06	PPP2R1B	Body	opensea
1403	cg23247879	0.856386	0.409719	0.446667	8.09418e-09	4.39437e-07	SLC25A26	Body	opensea
1404	cg22187354	0.68866	0.242102	0.446558	0.000784639	0.00711711	NRXN2	Body	island
1405	cg09699193	0.355518	0.802076	-0.446558	3.58045e-05	0.000540605	SEMA5A	5'UTR	opensea
1406	cg10959242	0.935332	0.488792	0.44654	3.6845e-17	3.79849e-14	ZFYVE28	Body	opensea
1407	cg23740652	0.792863	0.346396	0.446467	2.65451e-06	6.08633e-05	PTPRN2	Body	shore
1408	cg21011133	0.679537	0.233174	0.446363	2.18408e-05	0.000356417	ADCY3	TSS200	shore
1409	cg24207161	0.824066	0.377723	0.446342	3.99065e-08	1.71905e-06	TIAM2	Body	opensea
1410	cg09572125	0.865871	0.41957	0.446301	4.21219e-08	1.8006e-06	SYNGAP1	Body	opensea
1411	cg04367503	0.269714	0.715875	-0.446161	1.82468e-06	4.42754e-05	NFIX	Body	island
1412	cg13453847	0.359717	0.805812	-0.446094	3.28176e-05	0.000502574	LOC340094	TSS200	opensea
1413	cg20417351	0.744007	0.297931	0.446076	7.27423e-09	4.02529e-07	VPS53	Body	opensea
1414	cg15396367	0.687261	0.241234	0.446028	3.0789e-05	0.000475885	UAP1L1	Body	island
1415	cg13008935	0.892619	0.446771	0.445848	1.69605e-09	1.14703e-07	SRGAP3	Body	shore
1416	cg14712983	0.235376	0.68117	-0.445794	1.03082e-06	2.73583e-05	TNFRSF8	Body	opensea
1417	cg00776405	0.869359	0.423578	0.445781	9.3035e-10	6.79911e-08	TG	Body	opensea
1418	cg05040501	0.580837	0.135073	0.445764	7.79429e-05	0.0010356	CCDC88C	Body	shore
1419	cg23172664	0.840781	0.395023	0.445758	1.74323e-08	8.4699e-07	NT5E	Body	opensea
1420	cg16478977	0.889014	0.443284	0.44573	5.8982e-12	8.72094e-10	TMEM63C	Body	opensea
1421	cg06872548	0.795658	0.349945	0.445713	2.93e-06	6.60694e-05	RPTOR	Body	shelf
1422	cg18241469	0.790747	0.345096	0.445651	1.29257e-05	0.000229296	C3orf50	Body	opensea
1423	cg05294243	0.762065	0.316457	0.445608	1.29233e-07	4.70623e-06	KLK13	TSS1500	shore
1424	cg19522940	0.677646	0.232055	0.445591	4.63904e-07	1.39191e-05	HPGDS	TSS1500	opensea
1425	cg06955958	0.859481	0.413953	0.445529	3.09091e-10	2.64008e-08	SNORD6	TSS200	opensea
1426	cg09715499	0.661352	0.215927	0.445425	2.77747e-07	8.98882e-06	C7orf52	Body	shore
1427	cg03100044	0.772185	0.326779	0.445406	3.23102e-07	1.02357e-05	CHN2	TSS200	opensea
1428	cg12689803	0.710827	0.26555	0.445277	1.20769e-06	3.12763e-05	SRRM4	Body	opensea
1429	cg05376219	0.878362	0.433091	0.445271	1.64355e-12	2.89619e-10	SPPL2B	Body	shore
1430	cg09500171	0.928688	0.483463	0.445224	4.77492e-11	5.24045e-09	ATP8A1	Body	opensea
1431	cg04606397	0.723782	0.278571	0.44521	2.07097e-05	0.000340802	ARID1B	Body	opensea
1432	cg21037265	0.682317	0.23714	0.445177	1.30681e-06	3.3373e-05	DENND1C	TSS200	opensea
1433	cg05663480	0.785803	0.34074	0.445063	3.81907e-07	1.18026e-05	NFASC	5'UTR	opensea
1434	cg03078520	0.820097	0.375082	0.445014	1.324e-10	1.26787e-08	MICAL3	5'UTR	opensea
1435	cg07563611	0.811947	0.366993	0.444954	2.93227e-06	6.6106e-05	VAC14	Body	shore
1436	cg18842310	0.862779	0.418059	0.44472	8.59531e-12	1.20993e-09	MCF2L	Body	shelf
1437	cg22485921	0.784459	0.339765	0.444695	4.78193e-08	2.01294e-06	P4HA2	5'UTR	opensea
1438	cg07186472	0.941908	0.497265	0.444643	7.89757e-19	2.27018e-15	RAB40C	Body	shore
1439	cg24048338	0.880699	0.436069	0.44463	5.87185e-08	2.4004e-06	HGSNAT	Body	opensea
1440	cg06190046	0.682775	0.238266	0.444509	5.35129e-06	0.000109776	OSGIN1	5'UTR	opensea
1441	cg27518324	0.749368	0.304869	0.444499	1.03996e-05	0.000191497	DOCK9	Body	opensea
1442	cg02310296	0.797293	0.3529	0.444393	3.68433e-07	1.14443e-05	MMP9	TSS200	shore
1443	cg10786043	0.931068	0.486827	0.444241	2.86096e-13	6.58261e-11	TACC1	TSS1500	shore
1444	cg16633701	0.353772	0.79793	-0.444158	6.44111e-06	0.000127969	COL12A1	Body	opensea
1445	cg10242279	0.27449	0.718597	-0.444107	8.28416e-07	2.27158e-05	CLNK	Body	opensea
1446	cg25438801	0.779755	0.335835	0.44392	3.74603e-05	0.000561594	DIP2C	Body	shelf
1447	cg01805480	0.636504	0.192603	0.443901	8.47269e-05	0.00111058	FBRSL1	Body	shore
1448	cg05090695	0.647988	0.204149	0.443839	2.24313e-06	5.27564e-05	CDKN1C	TSS1500	island
1449	cg13345318	0.581063	0.137276	0.443787	6.00483e-05	0.000833209	GPR144	Body	island
1450	cg05382123	0.660752	0.217042	0.443709	4.1946e-06	8.94795e-05	C1orf94	TSS200	shore
1451	cg18860310	0.820771	0.377099	0.443672	2.17397e-10	1.93973e-08	SLC10A6	Body	opensea
1452	cg07071764	0.811696	0.368145	0.443551	8.66038e-10	6.38631e-08	FAT3	Body	opensea
1453	cg26348614	0.847706	0.404161	0.443545	1.4279e-11	1.87177e-09	IQGAP2	Body	opensea
1454	cg09451574	0.79771	0.354291	0.443419	5.59535e-06	0.00011382	C4orf32	Body	shore
1455	cg06432061	0.83344	0.390086	0.443354	3.5843e-09	2.19184e-07	MAP7	3'UTR	opensea
1456	cg13726166	0.891836	0.448492	0.443344	8.84767e-12	1.23861e-09	TIAF1	TSS1500	shelf
1457	cg17841545	0.832747	0.389403	0.443343	2.24363e-06	5.27651e-05	NRAP	Body	opensea
1458	cg17689490	0.248846	0.692179	-0.443333	1.10774e-06	2.9066e-05	DOCK1	Body	opensea
1459	cg27138018	0.86024	0.416975	0.443266	1.39817e-06	3.53148e-05	HAPLN2	1stExon	opensea
1460	cg05263838	0.825594	0.382497	0.443097	7.41429e-07	2.06758e-05	IRS1	3'UTR	shelf
1461	cg02859866	0.735207	0.292164	0.443044	1.02165e-08	5.35764e-07	FRMD4A	Body	opensea
1462	cg18335991	0.275338	0.718345	-0.443007	1.39626e-05	0.000244344	SEMA7A	Body	shore
1463	cg12323063	0.703266	0.260263	0.443003	1.2343e-06	3.18502e-05	MAP2K6	Body	opensea
1464	cg27064482	0.752627	0.309696	0.442931	1.21504e-10	1.17651e-08	MKL2	Body	opensea
1465	cg10450897	0.242679	0.685584	-0.442906	2.22162e-07	7.44978e-06	ZFPM2	Body	opensea
1466	cg18144906	0.570519	0.127722	0.442797	7.01377e-06	0.000137485	BEND4	TSS200	island
1467	cg09463650	0.81099	0.368254	0.442736	3.9642e-07	1.21801e-05	GAP43	Body	shore
1468	cg16686273	0.922823	0.48012	0.442704	5.20021e-10	4.12077e-08	IQCE	Body	opensea
1469	cg05166801	0.363345	0.805955	-0.442611	4.5731e-05	0.000663706	CAV2	Body	shelf
1470	cg27386912	0.716609	0.274027	0.442582	6.9244e-08	2.76636e-06	SEMA3G	TSS200	opensea
1471	cg02522485	0.929151	0.486591	0.442561	9.12559e-17	7.88704e-14	DAG1	5'UTR	opensea
1472	cg04470054	0.769486	0.326934	0.442553	4.71462e-06	9.86245e-05	RPTOR	Body	shore
1473	cg12968041	0.813437	0.370927	0.44251	4.64435e-06	9.73443e-05	ZNRF3	5'UTR	shore
1474	cg14355941	0.376853	0.819296	-0.442443	1.26939e-05	0.00022601	MIR496	TSS1500	opensea
1475	cg09750084	0.613696	0.171255	0.442441	9.59752e-05	0.00123325	LPAR6	5'UTR	opensea
1476	cg00504569	0.891374	0.449075	0.4423	1.72724e-06	4.22857e-05	ARID5B	Body	opensea
1477	cg17379666	0.782747	0.340555	0.442192	7.25186e-06	0.000141479	CDC42EP4	5'UTR	shelf
1478	cg18450582	0.246003	0.688138	-0.442135	9.06834e-08	3.47583e-06	DYNC1I1	Body	opensea
1479	cg01407332	0.563303	0.121216	0.442087	1.10507e-07	4.11354e-06	GPR133	Body	opensea
1480	cg24661860	0.944301	0.502248	0.442053	6.21835e-16	3.76925e-13	CASZ1	5'UTR	opensea
1481	cg16151538	0.929833	0.487851	0.441982	4.56874e-15	1.9598e-12	TRPC4AP	Body	shelf
1482	cg21531679	0.880253	0.438335	0.441918	3.91746e-11	4.41826e-09	IGF2BP2	Body	opensea
1483	cg12054453	0.805324	0.363512	0.441812	0.000103368	0.00131242	TMEM49	Body	opensea
1484	cg26771582	0.65432	0.212536	0.441785	5.05036e-05	0.000720818	FBXO31	Body	shore
1485	cg04274758	0.289045	0.730789	-0.441745	1.66159e-05	0.000283017	OSBPL3	Body	opensea
1486	cg00241712	0.712113	0.270402	0.441711	5.03739e-06	0.000104307	A4GALT	5'UTR	shore
1487	cg25999891	0.293754	0.73546	-0.441705	1.01074e-07	3.81426e-06	SREBF1	Body	shelf
1488	cg21611682	0.772007	0.330351	0.441656	6.71155e-10	5.12045e-08	LRP5	Body	opensea
1489	cg22402224	0.72396	0.282364	0.441596	1.79413e-05	0.000301774	ORAI2	Body	opensea
1490	cg11927233	0.746509	0.304947	0.441562	2.90045e-06	6.55045e-05	NPM1	Body	shore
1491	cg04545079	0.913742	0.472206	0.441537	8.35548e-18	1.15543e-14	CTCF	5'UTR	shelf
1492	cg17894755	0.611627	0.170134	0.441493	7.45536e-06	0.000144674	C10orf26	TSS200	opensea
1493	cg27384355	0.922352	0.480909	0.441443	2.33839e-12	3.92399e-10	C3orf26	Body	opensea
1494	cg05619785	0.841505	0.400116	0.441389	1.10675e-09	7.89863e-08	TNXB	TSS1500	opensea
1495	cg23869335	0.503232	0.0618942	0.441338	5.94458e-05	0.000826132	PTPRN	Body	island
1496	cg01651250	0.817518	0.37624	0.441278	1.13542e-10	1.11128e-08	TNXB	Body	shelf
1497	cg16227748	0.806841	0.365593	0.441248	3.666e-11	4.18089e-09	ARMC9	Body	opensea
1498	cg25406923	0.239839	0.681059	-0.44122	3.33488e-07	1.05174e-05	C2orf78	TSS1500	shelf
1499	cg10708739	0.700715	0.259523	0.441192	8.43766e-07	2.30617e-05	YPEL2	Body	opensea
1500	cg09054518	0.800442	0.359276	0.441166	8.50558e-08	3.29418e-06	KEL	TSS1500	opensea
1501	cg23247968	0.643968	0.202816	0.441152	9.3058e-06	0.000174391	C10orf26	5'UTR	opensea
1502	cg08113187	0.792934	0.351839	0.441095	9.46069e-12	1.31093e-09	ZCCHC14	Body	opensea
1503	cg09578155	0.794044	0.352997	0.441047	8.64116e-10	6.37444e-08	LRP5	Body	opensea
1504	cg25313447	0.288126	0.729164	-0.441038	5.5579e-06	0.000113232	FAM19A2	5'UTR	opensea
1505	cg18662228	0.653738	0.212722	0.441015	0.00116092	0.00983379	AGAP1	Body	island
1506	cg14596967	0.788441	0.347489	0.440953	1.74409e-12	3.04964e-10	ZBTB16	Body	shelf
1507	cg08348422	0.830651	0.389727	0.440924	2.56543e-11	3.07677e-09	AGAP1	Body	opensea
1508	cg11077392	0.779621	0.338743	0.440879	2.45635e-06	5.70606e-05	NAV2	Body	opensea
1509	cg14583999	0.685714	0.244875	0.440839	3.1727e-06	7.06039e-05	TMEM111	Body	opensea
1510	cg15714223	0.881033	0.440273	0.44076	3.85691e-08	1.66902e-06	ODZ4	Body	opensea
1511	cg14571004	0.172623	0.613354	-0.440731	2.97193e-07	9.52443e-06	GALNT12	TSS1500	shore
1512	cg10397932	0.73166	0.290942	0.440718	1.38331e-06	3.49979e-05	SKI	Body	opensea
1513	cg24342283	0.709708	0.269004	0.440704	2.78476e-07	9.00883e-06	CXCR5	Body	opensea
1514	cg15131156	0.75692	0.316257	0.440663	0.000153894	0.00183217	HAS1	TSS1500	opensea
1515	cg14612428	0.521581	0.0809979	0.440583	1.08644e-05	0.000198638	GNAL	5'UTR	island
1516	cg22543374	0.788815	0.348279	0.440536	1.00192e-07	3.78622e-06	FBN1	Body	opensea
1517	cg22862734	0.410845	0.851347	-0.440502	1.72738e-05	0.000292489	FREM2	1stExon	shore
1518	cg05087008	0.503229	0.943657	-0.440428	0.00152615	0.0123054	GRIA4	Body	shelf
1519	cg06161550	0.849238	0.408816	0.440422	1.95414e-07	6.69553e-06	GALNT9	Body	shelf
1520	cg24624090	0.774639	0.334236	0.440403	2.89793e-06	6.5451e-05	SLIT3	Body	opensea
1521	cg14716734	0.809899	0.369513	0.440386	6.4678e-09	3.64128e-07	CACNB2	Body	opensea
1522	cg11505113	0.742014	0.301655	0.440359	1.51923e-07	5.39995e-06	VASH2	Body	shore
1523	cg08079166	0.894723	0.454381	0.440343	3.78384e-14	1.1553e-11	MAP2K5	Body	opensea
1524	cg22734058	0.760909	0.320584	0.440325	2.47481e-05	0.000395631	LRRFIP1	Body	opensea
1525	cg18735089	0.87063	0.430308	0.440322	4.31302e-08	1.83812e-06	SMURF1	Body	shelf
1526	cg08461840	0.179563	0.61987	-0.440307	9.08816e-06	0.000170919	GNG7	5'UTR	shore
1527	cg08053846	0.777932	0.337675	0.440257	2.75423e-08	1.25369e-06	SERPINE1	TSS1500	opensea
1528	cg15331383	0.868539	0.428298	0.440241	1.39691e-11	1.83883e-09	RPTOR	Body	shelf
1529	cg24117274	0.579772	0.139574	0.440198	0.000108233	0.00136399	RAP1GAP	Body	shelf
1530	cg11678039	0.901717	0.461596	0.440121	4.49879e-12	6.89678e-10	RGL1	Body	opensea
1531	cg11670000	0.678995	0.238905	0.44009	7.24896e-09	4.01403e-07	PVRL2	Body	shelf
1532	cg05987698	0.529085	0.0890206	0.440064	6.15236e-05	0.00085066	HDAC11	TSS1500	island
1533	cg14548272	0.251598	0.691654	-0.440057	1.86426e-05	0.000311771	OSR2	5'UTR	island
1534	cg05318142	0.4748	0.0347486	0.440052	0.000122739	0.00151645	ATOH8	Body	opensea
1535	cg26730763	0.663548	0.223688	0.439861	8.05334e-10	6.00159e-08	XPO6	Body	opensea
1536	cg25044876	0.537763	0.0979864	0.439777	8.17192e-07	2.24548e-05	CYB5R3	5'UTR	shelf
1537	cg06720660	0.414747	0.854452	-0.439705	3.8147e-05	0.000570232	RNASE6	TSS1500	opensea
1538	cg21559943	0.908419	0.468716	0.439703	2.26286e-14	7.48063e-12	PTPRH	TSS1500	opensea
1539	cg11026604	0.847151	0.407464	0.439687	8.58755e-09	4.61493e-07	GABRB3	TSS1500	shore
1540	cg10051588	0.915462	0.475876	0.439586	3.29589e-11	3.80346e-09	FLJ39653	Body	shelf
1541	cg16585234	0.738516	0.298957	0.439558	2.58643e-07	8.47133e-06	MAN1C1	1stExon	shore
1542	cg10824503	0.914888	0.47533	0.439558	1.49233e-11	1.9425e-09	TSPAN9	Body	opensea
1543	cg23291048	0.745664	0.306109	0.439555	9.22916e-06	0.000173164	ERICH1	Body	opensea
1544	cg16682903	0.622667	0.183148	0.439519	0.000185234	0.00214015	ACVR1	5'UTR	opensea
1545	cg05063328	0.748267	0.308782	0.439485	3.52097e-07	1.10107e-05	MSRA	Body	opensea
1546	cg14935626	0.689012	0.249568	0.439445	1.06363e-05	0.000195088	VSNL1	Body	opensea
1547	cg01686739	0.649459	0.21005	0.439409	1.35457e-05	0.000238316	BTBD11	Body	opensea
1548	cg04835652	0.352405	0.791806	-0.439401	2.9493e-05	0.000458634	CCDC41	Body	opensea
1549	cg04715245	0.807088	0.367699	0.439389	1.4343e-07	5.13478e-06	IL6R	TSS1500	shore
1550	cg17038235	0.786343	0.347031	0.439312	9.03777e-08	3.4664e-06	ERGIC1	Body	opensea
1551	cg19356515	0.699108	0.259804	0.439304	0.000142241	0.00171603	EXPH5	Body	opensea
1552	cg13173536	0.700032	0.260742	0.43929	2.75824e-06	6.27898e-05	TTC15	Body	opensea
1553	cg13851466	0.702861	0.263582	0.439278	8.32644e-08	3.23309e-06	EPHA10	Body	island
1554	cg08583277	0.876863	0.437634	0.439229	2.19171e-13	5.25006e-11	ANKRD11	5'UTR	shore
1555	cg01836438	0.226985	0.666176	-0.439191	1.40071e-05	0.000244959	TLCD2	3'UTR	shelf
1556	cg23706782	0.804642	0.36547	0.439172	1.10534e-07	4.11416e-06	THSD4	Body	opensea
1557	cg22855405	0.656977	0.217876	0.439101	2.65914e-06	6.09549e-05	TINAGL1	TSS200	opensea
1558	cg01250138	0.956634	0.517537	0.439098	7.50743e-19	2.20329e-15	KIAA0513	5'UTR	shelf
1559	cg03539204	0.897785	0.458721	0.439065	6.77017e-16	4.02011e-13	B4GALNT3	Body	opensea
1560	cg06401414	0.679585	0.240531	0.439054	3.98387e-08	1.71649e-06	EIF2C2	Body	opensea
1561	cg20306842	0.863019	0.424044	0.438975	8.03012e-06	0.000154083	CREB5	5'UTR	opensea
1562	cg13157980	0.588708	0.149738	0.43897	2.33916e-05	0.000377407	EIF2C2	Body	opensea
1563	cg08436419	0.861833	0.422918	0.438916	1.8319e-10	1.67482e-08	DGKD	Body	opensea
1564	cg06906555	0.612531	0.173635	0.438896	9.0687e-07	2.45177e-05	CNTN2	TSS1500	opensea
1565	cg17339440	0.822958	0.384073	0.438885	3.28845e-09	2.03626e-07	RAB11FIP1	Body	opensea
1566	cg03565280	0.865374	0.426517	0.438857	9.69368e-09	5.12431e-07	WWC1	Body	opensea
1567	cg25483003	0.611221	0.172383	0.438838	6.42585e-06	0.000127746	ENTPD2	TSS1500	island
1568	cg12230728	0.667274	0.228563	0.438711	3.56098e-08	1.56251e-06	B4GALNT1	Body	island
1569	cg18400079	0.886542	0.447845	0.438697	5.15297e-10	4.08809e-08	AFAP1	Body	opensea
1570	cg15816464	0.810177	0.371558	0.43862	8.6072e-10	6.35974e-08	SMG6	Body	opensea
1571	cg19200285	0.616716	0.178137	0.438579	1.74145e-05	0.000294391	CACNA1C	3'UTR	island
1572	cg19612309	0.516267	0.0777253	0.438542	3.5435e-05	0.000535958	LTBP4	Body	shore
1573	cg05343159	0.179147	0.617688	-0.438541	8.71289e-08	3.36265e-06	NPS	TSS200	opensea
1574	cg19159092	0.677836	0.239314	0.438522	4.74148e-05	0.000683934	FLJ39609	TSS1500	shore
1575	cg16210979	0.740168	0.301734	0.438434	8.16656e-06	0.000156201	YTHDC2	Body	opensea
1576	cg04371413	0.862651	0.424232	0.438419	8.04266e-09	4.37029e-07	ADAM23	Body	opensea
1577	cg01919401	0.721038	0.282631	0.438408	9.253e-06	0.00017354	MKLN1	Body	opensea
1578	cg12510724	0.872619	0.434213	0.438407	1.08805e-12	2.0314e-10	SCNN1A	Body	opensea
1579	cg14839134	0.761096	0.322703	0.438393	7.30634e-09	4.04086e-07	RAB2A	Body	opensea
1580	cg05593589	0.44319	0.881534	-0.438343	2.2137e-05	0.000360444	SEMA5A	Body	opensea
1581	cg24599270	0.936597	0.498256	0.438341	1.57132e-15	7.92341e-13	RGS12	Body	opensea
1582	cg14422240	0.941959	0.503648	0.438311	4.69368e-14	1.38448e-11	FTSJD2	Body	opensea
1583	cg02794984	0.778146	0.339872	0.438274	4.53368e-09	2.67612e-07	KCNH4	Body	shore
1584	cg06359931	0.716837	0.278625	0.438212	6.21189e-09	3.5132e-07	LDLRAP1	Body	opensea
1585	cg09057412	0.881689	0.443478	0.43821	1.21362e-10	1.17556e-08	TULP4	Body	opensea
1586	cg23881566	0.816471	0.37827	0.438201	1.96469e-08	9.40476e-07	SRRM4	Body	opensea
1587	cg24952640	0.717416	0.27934	0.438076	7.48475e-08	2.95183e-06	TEAD4	Body	opensea
1588	cg26782150	0.769285	0.331221	0.438063	1.17468e-08	6.02459e-07	DIP2C	Body	opensea
1589	cg06061257	0.534843	0.0968089	0.438034	2.35993e-07	7.83464e-06	SDK2	Body	opensea
1590	cg03965649	0.872042	0.434046	0.437996	1.52503e-11	1.98127e-09	ST3GAL1	5'UTR	opensea
1591	cg00297966	0.83325	0.395329	0.437921	4.22812e-16	2.67413e-13	NSMCE2	Body	opensea
1592	cg03140118	0.672125	0.234206	0.437919	1.29368e-05	0.000229444	ZC3H12A	TSS1500	shore
1593	cg21913981	0.836757	0.398886	0.437871	5.65464e-06	0.000114769	MIR1178	TSS200	opensea
1594	cg16712866	0.934504	0.496634	0.43787	4.3064e-12	6.64428e-10	SNX29	Body	shelf
1595	cg15448445	0.701355	0.2635	0.437855	3.23901e-07	1.02555e-05	CMKLR1	TSS1500	opensea
1596	cg23178186	0.884056	0.446227	0.437829	5.00547e-09	2.91246e-07	TOLLIP	Body	opensea
1597	cg26416887	0.617505	0.179765	0.43774	2.4897e-05	0.00039756	CUX2	Body	opensea
1598	cg00369202	0.7215	0.283779	0.437721	3.20497e-08	1.42858e-06	GRM4	3'UTR	opensea
1599	cg12946080	0.8113	0.373617	0.437683	3.54199e-11	4.05762e-09	PLEKHG5	5'UTR	shore
1600	cg23031103	0.716348	0.278972	0.437376	1.06137e-05	0.000194788	CBLC	Body	opensea
1601	cg10380585	0.70393	0.266574	0.437355	4.59777e-05	0.000666694	TRAF5	5'UTR	shore
1602	cg18287066	0.673084	0.235758	0.437326	9.40361e-06	0.000176017	GREM2	5'UTR	opensea
1603	cg05501617	0.799307	0.362028	0.43728	1.57016e-06	3.90233e-05	IRF2	Body	opensea
1604	cg23112950	0.739622	0.302342	0.437279	1.07778e-06	2.84023e-05	CCS	Body	opensea
1605	cg15169374	0.699521	0.262419	0.437102	5.87316e-06	0.000118444	CACNB2	Body	opensea
1606	cg25799348	0.846437	0.409391	0.437046	2.90083e-11	3.42308e-09	FOXK1	Body	opensea
1607	cg09958560	0.91411	0.477076	0.437034	2.39555e-10	2.10733e-08	VTI1A	Body	opensea
1608	cg25216196	0.603197	0.16622	0.436976	1.34984e-05	0.000237637	MFAP4	TSS200	opensea
1609	cg23939642	0.896727	0.459819	0.436908	3.63637e-07	1.13221e-05	SLC38A10	Body	opensea
1610	cg04610274	0.70135	0.264525	0.436825	1.08629e-06	2.85895e-05	TSKU	5'UTR	opensea
1611	cg17430370	0.259615	0.696419	-0.436803	6.41303e-10	4.91661e-08	MYO3B	5'UTR	opensea
1612	cg10673351	0.423957	0.860725	-0.436768	1.04898e-05	0.000192879	KCNQ1	Body	opensea
1613	cg14603886	0.720244	0.283478	0.436766	1.38224e-06	3.49826e-05	ERN1	Body	shore
1614	cg00699986	0.87457	0.437811	0.436759	2.69658e-12	4.43207e-10	VSX1	Body	shore
1615	cg13942283	0.68265	0.245905	0.436744	6.62384e-05	0.000904931	RBM20	Body	opensea
1616	cg12431087	0.585495	0.148766	0.436729	2.39026e-07	7.91944e-06	FOXP1	5'UTR	opensea
1617	cg05757365	0.270058	0.706777	-0.436719	5.02004e-06	0.000104037	SLITRK5	Body	shore
1618	cg01524618	0.669463	0.232845	0.436618	3.66534e-05	0.000551279	UTRN	Body	opensea
1619	cg11259591	0.222805	0.659415	-0.43661	3.49416e-06	7.65934e-05	ALG9	3'UTR	opensea
1620	cg14765206	0.743064	0.306502	0.436562	7.67433e-10	5.76867e-08	DNMBP	5'UTR	opensea
1621	cg01012242	0.740172	0.303679	0.436493	8.05018e-08	3.13836e-06	SLC37A3	Body	opensea
1622	cg25940485	0.928663	0.492204	0.436459	5.4095e-17	5.12006e-14	MIR942	TSS1500	opensea
1623	cg17466795	0.625651	0.189269	0.436382	2.89475e-05	0.00045151	C20orf103	Body	shore
1624	cg12294026	0.86975	0.433373	0.436377	8.29896e-12	1.17626e-09	TRIO	Body	opensea
1625	cg04365777	0.446744	0.883086	-0.436343	9.93481e-07	2.65211e-05	SLC8A1	Body	opensea
1626	cg13409674	0.72501	0.288698	0.436312	1.66621e-06	4.10282e-05	TNXB	Body	opensea
1627	cg06404572	0.847149	0.410939	0.43621	1.08207e-08	5.63321e-07	ASAP1	Body	shelf
1628	cg23039189	0.543775	0.107669	0.436106	8.25851e-06	0.000157716	PPFIBP2	TSS1500	shore
1629	cg08089518	0.651923	0.215838	0.436084	1.71422e-07	5.98406e-06	JUP	5'UTR	shore
1630	cg05445187	0.874526	0.438444	0.436082	2.91945e-11	3.44108e-09	TBCD	Body	shore
1631	cg19925025	0.866787	0.430782	0.436005	3.8427e-12	5.99231e-10	PALM	Body	island
1632	cg15419073	0.650235	0.214251	0.435984	8.90938e-07	2.4151e-05	FGD5	Body	opensea
1633	cg24928726	0.82903	0.393113	0.435917	9.10811e-08	3.48747e-06	RGS8	Body	opensea
1634	cg08946713	0.757367	0.321544	0.435823	9.71181e-05	0.00124528	STAT1	Body	opensea
1635	cg12604162	0.741352	0.305572	0.43578	7.84263e-09	4.28575e-07	KCNAB2	TSS1500	shore
1636	cg11535638	0.905539	0.469762	0.435777	3.02185e-08	1.35718e-06	TACC2	Body	opensea
1637	cg19917714	0.937324	0.501592	0.435732	1.07096e-16	9.04527e-14	CNTN2	TSS1500	opensea
1638	cg04487659	0.740848	0.305135	0.435712	8.2278e-08	3.20118e-06	SH3D20	TSS1500	shore
1639	cg09903879	0.943273	0.507562	0.435711	9.76394e-12	1.34518e-09	EMP1	TSS1500	opensea
1640	cg07184986	0.630892	0.195184	0.435708	1.3535e-05	0.000238168	CCNJL	Body	opensea
1641	cg14500070	0.929278	0.493623	0.435655	3.14265e-17	3.36486e-14	ZBTB38	5'UTR	shore
1642	cg20965469	0.912358	0.476761	0.435596	4.9152e-11	5.3789e-09	AFF3	Body	opensea
1643	cg06729381	0.928955	0.493436	0.435519	3.92741e-17	3.97784e-14	SYT7	Body	opensea
1644	cg17397493	0.929354	0.493877	0.435477	1.22944e-15	6.54075e-13	PRLR	TSS1500	opensea
1645	cg12713583	0.860847	0.425382	0.435465	5.3992e-08	2.23518e-06	ARID3A	Body	island
1646	cg07608826	0.878077	0.442617	0.43546	2.91209e-10	2.50464e-08	EXOC4	Body	opensea
1647	cg16923137	0.9493	0.513905	0.435396	1.95386e-20	1.77123e-16	FAM171A1	Body	shelf
1648	cg12075498	0.912468	0.477074	0.435394	3.45291e-12	5.47233e-10	JAK1	5'UTR	shelf
1649	cg19113686	0.850626	0.415244	0.435382	9.90355e-09	5.21431e-07	RPL24	TSS1500	shore
1650	cg25302646	0.666938	0.23161	0.435327	0.000320832	0.00338769	PRDX6	TSS1500	shore
1651	cg22328746	0.858248	0.422943	0.435305	1.07393e-07	4.01998e-06	SORBS2	Body	opensea
1652	cg02679503	0.763768	0.328487	0.435281	1.5767e-07	5.56832e-06	MTA3	TSS1500	shore
1653	cg23449659	0.810862	0.375598	0.435264	1.09866e-07	4.09452e-06	TRPV6	1stExon	opensea
1654	cg02583740	0.802478	0.367288	0.43519	2.73269e-07	8.86215e-06	PRKAR1B	Body	island
1655	cg16512708	0.224273	0.659458	-0.435185	0.00114169	0.0097011	STARD7	1stExon	island
1656	cg13507084	0.715277	0.280106	0.435172	0.000401001	0.00407827	CNTFR	Body	opensea
1657	cg27617780	0.943392	0.508259	0.435132	7.80036e-17	6.96295e-14	FMNL2	Body	opensea
1658	cg06666175	0.168322	0.6034	-0.435078	3.87807e-09	2.34373e-07	COL12A1	TSS1500	shore
1659	cg22669060	0.699346	0.264481	0.434864	3.84552e-06	8.30854e-05	IFNGR2	TSS1500	shore
1660	cg11366934	0.642705	0.207883	0.434821	5.28726e-08	2.19485e-06	BRI3	Body	shore
1661	cg09744452	0.884739	0.449946	0.434794	8.52425e-15	3.28985e-12	RIMBP2	5'UTR	opensea
1662	cg00234261	0.73583	0.301065	0.434765	3.77886e-06	8.19011e-05	WDR86	Body	shore
1663	cg01515155	0.240969	0.675707	-0.434738	1.55296e-07	5.50117e-06	OR5L1	1stExon	opensea
1664	cg20883194	0.82667	0.391944	0.434726	9.8556e-06	0.000183049	ANO6	Body	opensea
1665	cg15626105	0.699787	0.265127	0.43466	6.82191e-05	0.000926774	ABI3BP	Body	opensea
1666	cg26894841	0.91175	0.477112	0.434638	7.21937e-15	2.87673e-12	DEF8	5'UTR	shore
1667	cg09803321	0.595049	0.160513	0.434535	6.70796e-05	0.00091428	NT5C2	Body	opensea
1668	cg00756172	0.440207	0.874735	-0.434528	4.63345e-05	0.000671009	LOC340094	TSS1500	opensea
1669	cg25481160	0.739428	0.304942	0.434487	0.000371795	0.00382502	FOXP1	Body	shelf
1670	cg09790270	0.732316	0.297927	0.434389	2.15727e-07	7.27301e-06	SLC41A1	Body	opensea
1671	cg05461140	0.625092	0.19075	0.434342	1.24053e-05	0.000221664	SSBP3	Body	opensea
1672	cg08420066	0.75984	0.325504	0.434336	6.1492e-08	2.49825e-06	KIAA1949	Body	opensea
1673	cg18700940	0.672057	0.237733	0.434324	0.000227257	0.00253889	MAP3K14	5'UTR	opensea
1674	cg07774251	0.830231	0.39591	0.434321	6.07092e-05	0.000841081	EXPH5	Body	opensea
1675	cg15209376	0.871036	0.436756	0.43428	3.49898e-16	2.33756e-13	ITGBL1	1stExon	shore
1676	cg09018299	0.782867	0.348589	0.434279	1.78906e-08	8.6647e-07	TNRC6A	Body	opensea
1677	cg12917058	0.881771	0.447528	0.434243	1.92048e-11	2.40466e-09	C1GALT1	5'UTR	opensea
1678	cg05377949	0.866371	0.432191	0.434179	4.79988e-07	1.43213e-05	EEFSEC	Body	opensea
1679	cg07035320	0.820501	0.386366	0.434135	2.52682e-11	3.03619e-09	CLSTN1	TSS1500	shore
1680	cg15391601	0.70716	0.273049	0.434111	2.5164e-06	5.82499e-05	FFAR3	TSS1500	opensea
1681	cg08464009	0.877084	0.44312	0.433964	6.34059e-09	3.57756e-07	PITPNM2	5'UTR	opensea
1682	cg11715789	0.733843	0.299904	0.433938	1.2743e-05	0.000226748	RUFY1	Body	opensea
1683	cg00172603	0.832554	0.398641	0.433913	2.35943e-08	1.09802e-06	SSBP3	Body	island
1684	cg20289949	0.671207	0.237439	0.433767	6.00477e-06	0.000120645	HAAO	1stExon	shore
1685	cg25170017	0.763624	0.329922	0.433702	1.34527e-08	6.77268e-07	EHD1	Body	shore
1686	cg10156302	0.343577	0.777271	-0.433694	0.000356826	0.00369945	DAPK2	Body	opensea
1687	cg17125688	0.626346	0.192666	0.43368	1.78672e-05	0.000300814	RHOB	TSS1500	shore
1688	cg24865779	0.519845	0.0861682	0.433676	3.80531e-05	0.000569056	IFNGR2	TSS200	shore
1689	cg19323951	0.557031	0.123364	0.433666	0.000223648	0.00250452	SLC22A20	Body	shore
1690	cg08229360	0.565525	0.131921	0.433604	5.71717e-06	0.000115814	CTDSPL	Body	shore
1691	cg19007269	0.517803	0.0842259	0.433578	0.000447731	0.00446652	SH3PXD2A	Body	shore
1692	cg24353272	0.910679	0.477102	0.433576	2.25688e-17	2.56082e-14	RRP15	3'UTR	opensea
1693	cg06637517	0.532053	0.0985497	0.433503	0.000145252	0.00174585	DNAH1	Body	opensea
1694	cg25451456	0.278159	0.711437	-0.433278	6.71826e-06	0.000132696	OR56A3	TSS1500	opensea
1695	cg02333237	0.631524	0.198278	0.433245	1.83441e-05	0.00030751	CDKL1	Body	opensea
1696	cg20694147	0.7624	0.329283	0.433117	2.21728e-07	7.43968e-06	MTHFD2	Body	opensea
1697	cg13543436	0.75169	0.318584	0.433106	8.66596e-06	0.000164167	PRUNE2	Body	opensea
1698	cg13889415	0.743134	0.310037	0.433096	4.74044e-07	1.41765e-05	COL27A1	Body	opensea
1699	cg21208682	0.592835	0.159763	0.433072	2.19926e-06	5.18951e-05	EIF2C2	Body	opensea
1700	cg26503792	0.653048	0.219978	0.43307	1.36417e-06	3.45945e-05	PPP1R10	5'UTR	opensea
1701	cg01321816	0.867714	0.434668	0.433046	1.1897e-11	1.59593e-09	BLM	3'UTR	shelf
1702	cg11847235	0.838006	0.404968	0.433038	3.01748e-09	1.88853e-07	KCNIP1	Body	opensea
1703	cg26187031	0.819804	0.386856	0.432948	4.71784e-08	1.98883e-06	DPYSL2	Body	opensea
1704	cg05475440	0.820345	0.387439	0.432906	2.64647e-08	1.21113e-06	NLK	Body	opensea
1705	cg03059247	0.839183	0.406367	0.432817	5.5689e-08	2.29472e-06	C8orf12	Body	opensea
1706	cg23014759	0.84574	0.412955	0.432784	1.51606e-07	5.39009e-06	BCL9	5'UTR	opensea
1707	cg02625590	0.705853	0.273083	0.432771	6.93321e-07	1.95515e-05	TMEM91	5'UTR	shelf
1708	cg27015057	0.47649	0.0438138	0.432677	0.000936605	0.00823923	SPRY4	5'UTR	island
1709	cg18827107	0.420593	0.853187	-0.432594	8.39368e-07	2.29637e-05	RASSF9	TSS1500	opensea
1710	cg06855485	0.553637	0.121062	0.432575	6.11892e-05	0.000846639	GAB1	Body	opensea
1711	cg19404444	0.802975	0.370428	0.432547	3.48954e-07	1.093e-05	SKI	Body	shelf
1712	cg18472912	0.340836	0.773379	-0.432543	2.01221e-06	4.81387e-05	WWC1	Body	opensea
1713	cg02515422	0.511907	0.0793712	0.432536	0.000319418	0.0033752	TLR4	Body	opensea
1714	cg07944862	0.881347	0.448897	0.43245	4.76697e-12	7.25609e-10	RARA	Body	shore
1715	cg01552711	0.705969	0.273599	0.432371	6.76987e-05	0.000921117	IL17D	Body	opensea
1716	cg09840721	0.896523	0.464181	0.432342	1.18126e-11	1.58828e-09	B3GNTL1	Body	shore
1717	cg24260359	0.915611	0.483304	0.432307	7.64197e-15	3.00623e-12	DNASE1L3	TSS200	opensea
1718	cg14015502	0.727463	0.295163	0.4323	6.34912e-06	0.000126505	C10orf26	TSS1500	opensea
1719	cg15753916	0.77282	0.340591	0.432229	1.64714e-07	5.78505e-06	DUSP14	5'UTR	shelf
1720	cg02138098	0.856133	0.42392	0.432213	1.29551e-16	1.04238e-13	PRKCZ	5'UTR	shore
1721	cg23528791	0.786129	0.35393	0.4322	2.62393e-07	8.57284e-06	CNKSR3	Body	opensea
1722	cg11401957	0.907205	0.475064	0.43214	2.18781e-10	1.95115e-08	CSMD2	Body	opensea
1723	cg17902551	0.685325	0.253202	0.432123	1.94613e-06	4.68352e-05	CACNA1C	3'UTR	island
1724	cg09029902	0.559001	0.126904	0.432097	0.000375665	0.00385899	ZNF217	5'UTR	shore
1725	cg01857186	0.35424	0.78632	-0.43208	2.34836e-05	0.000378501	OR4D5	1stExon	opensea
1726	cg24204282	0.794634	0.362558	0.432077	1.86233e-06	4.50716e-05	GYLTL1B	Body	shore
1727	cg09863630	0.759491	0.327456	0.432035	7.75347e-05	0.00103091	MEIS2	Body	opensea
1728	cg21739530	0.547273	0.115296	0.431978	0.000146434	0.00175761	GALNT7	Body	opensea
1729	cg08374799	0.801297	0.369358	0.431939	1.43584e-09	9.87916e-08	ITGB7	TSS200	opensea
1730	cg22522688	0.817425	0.385486	0.431939	4.24036e-10	3.46933e-08	SSH1	1stExon	opensea
1731	cg21011570	0.782944	0.351017	0.431927	3.20482e-08	1.42858e-06	CORO1C	5'UTR	shore
1732	cg04427651	0.618542	0.186625	0.431917	3.2371e-07	1.02519e-05	ZDHHC18	TSS1500	shore
1733	cg17092065	0.775613	0.343754	0.431859	1.17897e-08	6.04356e-07	SMAD3	Body	opensea
1734	cg14717752	0.844924	0.413067	0.431857	3.32237e-09	2.05414e-07	FAM105B	Body	opensea
1735	cg26122963	0.799308	0.367456	0.431852	1.61999e-09	1.10106e-07	PCOLCE	TSS1500	shelf
1736	cg18852618	0.631974	0.200124	0.43185	0.000120615	0.00149477	DRD3	1stExon	opensea
1737	cg23206160	0.485802	0.0539633	0.431839	0.000181416	0.00210324	MAML3	Body	opensea
1738	cg26247841	0.929573	0.497853	0.431719	1.52689e-16	1.18643e-13	ANK2	Body	opensea
1739	cg06245989	0.768585	0.336885	0.4317	5.49027e-05	0.000772761	PLEKHA7	Body	opensea
1740	cg01157046	0.744151	0.312454	0.431697	2.82203e-07	9.10983e-06	SGPP2	Body	opensea
1741	cg04838832	0.63394	0.202285	0.431655	2.27645e-05	0.000369041	ADAMTS14	Body	opensea
1742	cg20886049	0.869532	0.437906	0.431626	1.55098e-12	2.75035e-10	TSKU	TSS1500	shore
1743	cg04896832	0.785291	0.353696	0.431595	6.38092e-05	0.000877829	CASZ1	Body	opensea
1744	cg17491449	0.790508	0.359038	0.43147	1.56719e-09	1.06874e-07	RGS12	Body	shelf
1745	cg09675604	0.327971	0.759255	-0.431284	0.000193156	0.002217	LAMB1	Body	opensea
1746	cg10324998	0.679185	0.247943	0.431242	5.6541e-05	0.000791968	TGFBR3	5'UTR	opensea
1747	cg08818866	0.496223	0.927394	-0.431171	0.000154316	0.00183588	LTBP1	Body	opensea
1748	cg23004960	0.605827	0.174789	0.431038	2.44893e-08	1.1319e-06	MYL10	Body	opensea
1749	cg09169117	0.571688	0.140687	0.431001	9.23475e-05	0.00119416	FMNL2	Body	opensea
1750	cg27146050	0.587628	0.156631	0.430998	3.12019e-06	6.96268e-05	HIF3A	Body	shore
1751	cg09331409	0.801332	0.370392	0.430941	2.47462e-05	0.000395617	MAP6	Body	opensea
1752	cg11153071	0.951247	0.520365	0.430882	5.3384e-17	5.06451e-14	RPTOR	Body	opensea
1753	cg22007809	0.757195	0.326384	0.430811	1.69357e-06	4.16138e-05	TRAK2	Body	opensea
1754	cg05875421	0.933345	0.502557	0.430788	1.70266e-19	7.63274e-16	GPR68	5'UTR	opensea
1755	cg18554789	0.737704	0.306929	0.430774	0.000339312	0.00354719	HIPK2	Body	opensea
1756	cg17888563	0.954	0.523411	0.430589	3.45885e-16	2.32072e-13	RPTOR	Body	shore
1757	cg26880239	0.591959	0.161376	0.430583	8.0262e-05	0.00106088	CD247	Body	opensea
1758	cg12626076	0.833409	0.402868	0.430542	3.17486e-10	2.70442e-08	SLCO3A1	Body	shore
1759	cg11243995	0.632424	0.201926	0.430498	3.66977e-06	7.99233e-05	C1orf198	Body	shore
1760	cg14608770	0.80822	0.377827	0.430393	4.99118e-08	2.08902e-06	NXNL1	TSS200	opensea
1761	cg20645040	0.465671	0.0353588	0.430313	9.38402e-05	0.0012102	ZMYND8	Body	opensea
1762	cg01041239	0.565027	0.134717	0.43031	1.70956e-06	4.19309e-05	C18orf1	5'UTR	shelf
1763	cg02851203	0.870967	0.440691	0.430276	4.49764e-07	1.35547e-05	SSBP3	Body	opensea
1764	cg19561297	0.554644	0.124374	0.43027	0.000979177	0.00854756	LRRC17	5'UTR	opensea
1765	cg23694490	0.82061	0.390374	0.430236	8.38517e-10	6.21708e-08	TNS3	Body	opensea
1766	cg03546806	0.240193	0.670395	-0.430202	2.13626e-05	0.000349957	RBM19	Body	opensea
1767	cg22898082	0.809837	0.379754	0.430083	1.5165e-10	1.43038e-08	SMARCA4	5'UTR	shelf
1768	cg19483007	0.638532	0.208451	0.430081	1.10639e-06	2.90468e-05	WWTR1	Body	opensea
1769	cg07231911	0.771164	0.34111	0.430054	5.15799e-09	2.99096e-07	BCAR3	5'UTR	opensea
1770	cg17552116	0.793785	0.363749	0.430036	2.78883e-11	3.31103e-09	PLXNA1	Body	opensea
1771	cg14397171	0.661986	0.231994	0.429992	1.2791e-05	0.000227461	CHSY1	Body	opensea
1772	cg16506432	0.387911	0.817862	-0.429952	1.45697e-05	0.000253164	CDC20B	Body	opensea
1773	cg17988310	0.798152	0.368312	0.42984	7.69464e-08	3.0217e-06	GRAP2	Body	opensea
1774	cg14266611	0.87625	0.446624	0.429625	2.16238e-10	1.9315e-08	MLLT3	Body	opensea
1775	cg14841828	0.188519	0.618136	-0.429617	5.87941e-11	6.28687e-09	BCL11B	Body	opensea
1776	cg24176926	0.783474	0.353867	0.429607	8.62178e-08	3.33317e-06	CCDC48	Body	shore
1777	cg18818531	0.737015	0.307425	0.42959	1.59608e-07	5.62849e-06	FOSL1	TSS1500	shore
1778	cg15702185	0.703015	0.273441	0.429573	1.93248e-07	6.63747e-06	MIRLET7A3	TSS1500	opensea
1779	cg00105640	0.794213	0.364643	0.42957	3.66306e-08	1.60007e-06	LOC388588	Body	shelf
1780	cg16356622	0.646982	0.217508	0.429474	9.33541e-07	2.51488e-05	EIF2C1	Body	shelf
1781	cg08586692	0.386069	0.815507	-0.429438	6.95295e-06	0.000136509	NAA11	1stExon	opensea
1782	cg07710883	0.79927	0.369887	0.429383	4.25094e-09	2.53952e-07	CAPN1	Body	island
1783	cg14251734	0.801962	0.372622	0.429339	0.000136214	0.00165533	HPSE2	Body	opensea
1784	cg16536016	0.702863	0.273606	0.429257	7.69169e-06	0.000148553	PLEKHA2	TSS1500	shore
1785	cg07839457	0.785776	0.356574	0.429201	5.3376e-10	4.21326e-08	NLRC5	TSS1500	shore
1786	cg12559197	0.867971	0.438819	0.429152	6.40967e-09	3.61254e-07	PDE8B	Body	opensea
1787	cg17603988	0.59712	0.168017	0.429103	1.15848e-05	0.000209518	PHKG1	TSS200	opensea
1788	cg08726417	0.748705	0.319613	0.429092	3.86611e-11	4.37365e-09	MYLK2	TSS200	shelf
1789	cg20314490	0.470597	0.0415442	0.429053	0.000820188	0.00738455	NPTX2	Body	shore
1790	cg11093142	0.843201	0.41427	0.428931	0.000110334	0.00138559	RCBTB2	Body	opensea
1791	cg00832923	0.402636	0.831564	-0.428928	2.12606e-05	0.000348566	GIMAP4	3'UTR	opensea
1792	cg25941682	0.772112	0.343204	0.428908	1.46899e-06	3.6866e-05	PDE8A	Body	opensea
1793	cg12623101	0.746552	0.317679	0.428873	1.67252e-07	5.86309e-06	C7orf20	Body	shore
1794	cg06357561	0.812958	0.384156	0.428801	4.8244e-07	1.43843e-05	STAT5A	TSS200	shore
1795	cg16914035	0.587262	0.158472	0.428791	0.00018831	0.00217003	FILIP1	Body	opensea
1796	cg17087698	0.828524	0.399761	0.428763	7.89383e-07	2.17831e-05	TULP4	Body	opensea
1797	cg16283183	0.928265	0.499576	0.428688	8.05834e-14	2.21219e-11	LIMD1	3'UTR	opensea
1798	cg06838283	0.851374	0.422737	0.428638	4.38003e-14	1.30613e-11	C5orf13	Body	shelf
1799	cg16846518	0.711298	0.282693	0.428605	1.0229e-05	0.000188866	EEFSEC	Body	opensea
1800	cg02433278	0.551975	0.12338	0.428595	0.000119223	0.00148018	ERBB2	5'UTR	shore
1801	cg15374435	0.904556	0.475963	0.428593	4.22346e-10	3.45696e-08	SPRY2	Body	shore
1802	cg02737619	0.748543	0.320045	0.428498	3.39448e-07	1.0674e-05	SKI	Body	island
1803	cg18731680	0.891457	0.463046	0.428411	4.99343e-10	3.99102e-08	COMT	Body	opensea
1804	cg19759804	0.497713	0.0693459	0.428367	5.16088e-07	1.52405e-05	LDLRAP1	Body	opensea
1805	cg09758273	0.86888	0.440541	0.428339	4.11311e-07	1.25638e-05	CTBP1	Body	shelf
1806	cg06503824	0.944338	0.516033	0.428305	8.89856e-21	1.05555e-16	CACNA1G	Body	shelf
1807	cg10619411	0.273943	0.702197	-0.428254	4.16011e-05	0.000613104	LRRK1	Body	shore
1808	cg08761535	0.898757	0.470528	0.428229	1.98536e-15	9.58344e-13	ZNRF1	Body	opensea
1809	cg26782833	0.709295	0.281069	0.428227	7.92626e-05	0.00104992	AMMECR1L	5'UTR	shore
1810	cg10779317	0.261776	0.689997	-0.428221	1.8573e-06	4.49706e-05	USP22	TSS1500	shore
1811	cg13375828	0.715966	0.287745	0.428221	8.31257e-07	2.2782e-05	P2RX5	Body	shore
1812	cg09075743	0.854812	0.426628	0.428184	4.09296e-09	2.45672e-07	MAD1L1	Body	shore
1813	cg16697896	0.936777	0.508605	0.428172	1.55186e-16	1.19446e-13	FOXP1	Body	opensea
1814	cg03565674	0.798848	0.370694	0.428154	9.10774e-12	1.26892e-09	HCCA2	Body	opensea
1815	cg00583535	0.756229	0.32812	0.428109	3.75124e-08	1.63038e-06	IGFN1	TSS200	opensea
1816	cg04739880	0.872949	0.444929	0.42802	3.33463e-06	7.36266e-05	ANKS1A	Body	opensea
1817	cg16314254	0.689974	0.261969	0.428005	0.000763245	0.00695786	GALNT2	Body	opensea
1818	cg17013166	0.402106	0.830106	-0.428001	7.65536e-05	0.00102016	GAL3ST1	TSS1500	opensea
1819	cg01556706	0.520411	0.0924438	0.427967	0.000592447	0.00563323	FHIT	Body	opensea
1820	cg13321661	0.665478	0.237541	0.427937	2.97513e-06	6.69021e-05	INADL	Body	opensea
1821	cg02911387	0.808924	0.381011	0.427913	9.06744e-08	3.47581e-06	CUX1	Body	opensea
1822	cg14157527	0.892548	0.464653	0.427895	2.00871e-12	3.44299e-10	FREQ	Body	shelf
1823	cg13765206	0.665174	0.237286	0.427888	2.19691e-06	5.18486e-05	EMILIN2	Body	island
1824	cg21914290	0.318445	0.746324	-0.427879	7.61458e-06	0.000147336	PRRX1	Body	shore
1825	cg25331271	0.822299	0.394423	0.427876	6.38543e-09	3.60037e-07	SBF2	Body	opensea
1826	cg01029669	0.867412	0.439607	0.427805	6.4056e-10	4.91275e-08	PNMAL2	TSS1500	shore
1827	cg03996020	0.754367	0.326749	0.427618	3.15868e-05	0.000486337	DNAJB6	Body	opensea
1828	cg13549667	0.607996	0.180452	0.427544	2.2026e-06	5.19621e-05	IFI30	TSS200	shore
1829	cg20737909	0.79694	0.36943	0.42751	5.40399e-11	5.84128e-09	HCCA2	Body	opensea
1830	cg14051662	0.889848	0.462422	0.427427	1.76079e-11	2.2328e-09	RXRA	Body	opensea
1831	cg00286125	0.563479	0.136069	0.42741	8.162e-06	0.000156126	HSPB6	Body	island
1832	cg15031753	0.934235	0.506852	0.427383	2.73574e-14	8.73251e-12	STOX2	Body	opensea
1833	cg08911152	0.705151	0.277808	0.427344	6.41981e-10	4.91995e-08	TG	Body	opensea
1834	cg00698688	0.845949	0.418707	0.427242	2.39537e-09	1.5481e-07	SULT2B1	1stExon	opensea
1835	cg20234121	0.568035	0.140803	0.427232	3.25262e-06	7.20602e-05	BID	TSS200	shore
1836	cg08428878	0.20749	0.634715	-0.427225	1.2112e-06	3.13512e-05	LASS3	TSS1500	shore
1837	cg20827077	0.886254	0.459049	0.427205	1.32918e-06	3.38488e-05	FMN1	Body	opensea
1838	cg22971402	0.893775	0.46657	0.427205	2.20035e-12	3.72451e-10	GRM4	Body	shelf
1839	cg06640763	0.779036	0.351837	0.427199	2.14711e-06	5.08618e-05	SSPO	TSS200	shelf
1840	cg01993952	0.772053	0.344864	0.427189	9.46615e-08	3.60662e-06	MTUS1	Body	opensea
1841	cg00143527	0.786116	0.358927	0.427189	2.85731e-09	1.80295e-07	MESDC1	TSS1500	shore
1842	cg17158750	0.820302	0.393122	0.427181	2.1139e-06	5.01886e-05	COL20A1	TSS200	shelf
1843	cg06909254	0.941629	0.514454	0.427175	1.64362e-16	1.25327e-13	ST3GAL5	Body	opensea
1844	cg01040624	0.410738	0.837879	-0.427141	0.00040766	0.00413322	SLC12A8	Body	opensea
1845	cg00768359	0.70801	0.280923	0.427086	1.24898e-05	0.000222901	KLK5	5'UTR	opensea
1846	cg09152866	0.745309	0.31824	0.427069	1.93418e-05	0.000321829	C6orf105	3'UTR	opensea
1847	cg09261902	0.773121	0.346075	0.427046	3.33076e-06	7.35532e-05	AP3D1	Body	shelf
1848	cg26009944	0.831249	0.404252	0.426997	1.81317e-09	1.21375e-07	OSBPL9	5'UTR	opensea
1849	cg06933965	0.687321	0.26034	0.426981	8.66523e-07	2.35848e-05	CMKLR1	1stExon	opensea
1850	cg16634404	0.68533	0.258352	0.426978	8.64943e-08	3.34208e-06	COL11A2	TSS1500	shore
1851	cg17972013	0.896938	0.470007	0.426931	1.58191e-11	2.0441e-09	SNORD123	TSS1500	shore
1852	cg14724419	0.833838	0.406925	0.426912	1.25282e-09	8.78131e-08	C11orf93	Body	opensea
1853	cg01804036	0.639066	0.212166	0.4269	5.43466e-06	0.000111178	TESC	Body	shore
1854	cg03987648	0.726732	0.299833	0.426899	5.07671e-07	1.50213e-05	MAML3	Body	opensea
1855	cg25872816	0.9427	0.515811	0.42689	2.26616e-17	2.56082e-14	ZNF516	5'UTR	shore
1856	cg07906520	0.657822	0.230945	0.426877	1.81426e-07	6.28116e-06	PPP1R16B	5'UTR	shore
1857	cg26161895	0.87592	0.449051	0.426869	1.41137e-11	1.85309e-09	FNIP2	Body	opensea
1858	cg11122009	0.792236	0.365402	0.426834	1.62357e-09	1.10313e-07	AXIN2	Body	shore
1859	cg09761846	0.790083	0.363293	0.42679	8.31597e-08	3.23056e-06	P2RX3	Body	shore
1860	cg08317580	0.344588	0.771355	-0.426767	0.000222886	0.00249764	IL4R	5'UTR	opensea
1861	cg23994112	0.734645	0.307889	0.426756	2.57258e-05	0.000408491	SEPT9	5'UTR	shelf
1862	cg18994033	0.809952	0.383222	0.42673	3.34605e-06	7.38189e-05	ITM2C	Body	shelf
1863	cg12269292	0.914797	0.488082	0.426715	1.8914e-11	2.37189e-09	TSSC1	Body	opensea
1864	cg23839159	0.574643	0.147992	0.426652	0.00020144	0.00229571	CCDC23	Body	shore
1865	cg20665157	0.84975	0.423102	0.426647	3.89095e-05	0.000579909	CADPS2	Body	opensea
1866	cg18715243	0.556655	0.130035	0.42662	6.26403e-05	0.000863525	GPR124	Body	shelf
1867	cg20039257	0.90918	0.482576	0.426604	1.24075e-10	1.19855e-08	NCALD	5'UTR	opensea
1868	cg14395444	0.762843	0.336242	0.426601	5.23393e-07	1.54172e-05	CACNA1C	Body	island
1869	cg13886799	0.734411	0.307861	0.42655	1.18233e-07	4.36567e-06	ANO7	5'UTR	opensea
1870	cg23659250	0.777371	0.350825	0.426545	1.82289e-06	4.42399e-05	BRD1	Body	shelf
1871	cg08329754	0.880563	0.45411	0.426453	1.92373e-07	6.60967e-06	RPTOR	Body	shore
1872	cg16674860	0.600316	0.173873	0.426443	1.6551e-05	0.000282063	HPS1	5'UTR	opensea
1873	cg13178361	0.829315	0.402925	0.426391	4.71001e-08	1.98594e-06	UAP1	5'UTR	shore
1874	cg17072519	0.841906	0.415556	0.42635	5.71851e-11	6.13896e-09	AIFM3	5'UTR	shelf
1875	cg25439479	0.642992	0.216675	0.426317	2.90871e-05	0.00045322	RUNX1T1	3'UTR	opensea
1876	cg06445611	0.33179	0.758088	-0.426299	3.10689e-06	6.93604e-05	GABRR2	TSS200	opensea
1877	cg10881162	0.700551	0.274306	0.426245	0.000144371	0.00173731	ERC2	3'UTR	opensea
1878	cg13561792	0.922246	0.496004	0.426242	7.43466e-15	2.93316e-12	ATP2A3	Body	shore
1879	cg18476530	0.780281	0.354053	0.426228	5.89561e-07	1.70523e-05	LOC100130987	Body	shore
1880	cg27523577	0.865733	0.439505	0.426228	2.2359e-11	2.7411e-09	TRABD	5'UTR	shore
1881	cg02911509	0.810098	0.383902	0.426196	7.48747e-09	4.11704e-07	PARVG	TSS200	opensea
1882	cg20278269	0.856296	0.430118	0.426179	1.87277e-09	1.24813e-07	LRP5	Body	shore
1883	cg22473727	0.701601	0.275423	0.426178	2.36801e-06	5.52825e-05	DUSP1	TSS1500	shore
1884	cg08189198	0.880838	0.454678	0.42616	2.11322e-05	0.000346726	NIN	5'UTR	opensea
1885	cg11961495	0.903947	0.477787	0.426159	2.23334e-15	1.06061e-12	ZMIZ1	5'UTR	opensea
1886	cg22882539	0.637233	0.211101	0.426133	0.000142417	0.00171765	GPR133	5'UTR	opensea
1887	cg01613455	0.456274	0.030179	0.426095	0.00101687	0.00881778	NPTX2	Body	shore
1888	cg03387585	0.701836	0.275777	0.426059	2.38593e-07	7.90974e-06	KIRREL3	Body	opensea
1889	cg13271643	0.723328	0.297273	0.426054	1.46637e-05	0.000254614	CRYL1	Body	opensea
1890	cg21389569	0.555454	0.129419	0.426035	2.50925e-07	8.25302e-06	CPLX3	TSS1500	opensea
1891	cg07382943	0.686521	0.260536	0.425985	0.000284116	0.00305713	IGLON5	Body	island
1892	cg02734358	0.805779	0.379795	0.425984	6.69943e-05	0.0009133	GPRIN3	5'UTR	shore
1893	cg08575696	0.581709	0.155729	0.42598	7.80764e-06	0.000150401	CABP1	TSS1500	opensea
1894	cg16672223	0.807232	0.381311	0.425921	3.11879e-10	2.66167e-08	CMIP	Body	opensea
1895	cg09803959	0.739177	0.313272	0.425905	7.72795e-06	0.000149162	RPTOR	Body	shore
1896	cg22110158	0.853334	0.427475	0.425858	1.08762e-07	4.06117e-06	ST14	Body	opensea
1897	cg15128141	0.742803	0.316946	0.425856	3.15475e-05	0.00048586	GALNT9	Body	island
1898	cg06654691	0.704093	0.278268	0.425825	3.62368e-06	7.90587e-05	PLEKHH3	Body	shore
1899	cg13808641	0.857078	0.431323	0.425754	1.20396e-08	6.15853e-07	WNK2	Body	shelf
1900	cg05635754	0.647155	0.221414	0.42574	6.27398e-06	0.000125258	JAK3	5'UTR	island
1901	cg20902566	0.934051	0.50833	0.425721	7.6544e-11	7.92118e-09	JAZF1	Body	opensea
1902	cg05740243	0.709977	0.284278	0.425699	9.36479e-07	2.52129e-05	PRAP1	TSS200	opensea
1903	cg19017553	0.83061	0.404915	0.425695	8.06487e-07	2.22011e-05	PARD3	Body	opensea
1904	cg04185123	0.240163	0.665814	-0.42565	2.19735e-08	1.03449e-06	DPYSL3	Body	opensea
1905	cg04721825	0.77527	0.349657	0.425613	1.02984e-06	2.73387e-05	PRKCA	Body	opensea
1906	cg23843812	0.496769	0.071172	0.425597	3.72324e-05	0.000558547	C8orf86	1stExon	opensea
1907	cg26546884	0.611575	0.186012	0.425563	1.98318e-05	0.000328561	GMDS	Body	opensea
1908	cg04914221	0.770724	0.345232	0.425492	2.34916e-05	0.000378571	TLN2	Body	opensea
1909	cg00069391	0.283296	0.708687	-0.425391	5.8989e-06	0.000118875	SDK1	Body	opensea
1910	cg02824980	0.819923	0.394543	0.425379	5.37944e-10	4.24137e-08	CYP4F12	TSS200	opensea
1911	cg03861217	0.867816	0.44244	0.425376	4.63805e-10	3.75107e-08	KCNJ3	Body	opensea
1912	cg18637459	0.675395	0.250019	0.425376	1.43802e-07	5.14585e-06	TMEM119	TSS200	opensea
1913	cg04882394	0.574827	0.149513	0.425314	5.00101e-06	0.000103685	MIB2	3'UTR	island
1914	cg16444629	0.581477	0.15617	0.425306	0.000140098	0.00169508	FLJ32810	Body	opensea
1915	cg20857709	0.66769	0.242398	0.425293	3.81597e-05	0.00057038	HAAO	5'UTR	island
1916	cg11384427	0.913975	0.48869	0.425285	1.54096e-12	2.73707e-10	CD27	TSS1500	opensea
1917	cg17683336	0.754721	0.329446	0.425275	1.09638e-07	4.08729e-06	KANK2	5'UTR	shore
1918	cg09031013	0.502031	0.927262	-0.42523	0.000189524	0.00218137	KCNE1	5'UTR	shelf
1919	cg08753403	0.409369	0.834567	-0.425198	1.0502e-05	0.000193069	CLEC2B	Body	opensea
1920	cg03460756	0.7326	0.307442	0.425158	2.87549e-08	1.29961e-06	ITGB3	Body	opensea
1921	cg22121570	0.625644	0.200671	0.424974	1.30138e-05	0.000230559	LOC145845	Body	shelf
1922	cg16592832	0.762173	0.337217	0.424956	1.07621e-06	2.83647e-05	C22orf45	TSS1500	island
1923	cg24352349	0.855666	0.430733	0.424933	1.6924e-11	2.16019e-09	C22orf9	Body	shore
1924	cg15890075	0.73166	0.306763	0.424897	1.11331e-08	5.77249e-07	MYO15A	TSS200	opensea
1925	cg09247692	0.775568	0.350707	0.424861	1.13697e-05	0.000206322	BAIAP2L2	TSS200	opensea
1926	cg18434356	0.410253	0.835106	-0.424853	8.67555e-05	0.00113382	C1QTNF7	Body	opensea
1927	cg04376719	0.695762	0.270917	0.424845	1.09432e-06	2.87732e-05	CNN2	Body	island
1928	cg16523590	0.816493	0.391657	0.424836	4.63601e-12	7.07787e-10	ATP11A	Body	opensea
1929	cg09445448	0.587293	0.162462	0.424831	1.23803e-06	3.19262e-05	FAM78A	1stExon	island
1930	cg23651976	0.689674	0.264875	0.424799	6.43692e-07	1.83589e-05	TCEA3	Body	shore
1931	cg23913963	0.890726	0.465944	0.424781	2.37323e-07	7.87328e-06	RCC2	TSS1500	shore
1932	cg11610626	0.171157	0.595905	-0.424748	1.08163e-08	5.63163e-07	THEMIS	5'UTR	opensea
1933	cg06223539	0.604275	0.179544	0.424731	7.98024e-05	0.0010558	SHANK2	Body	opensea
1934	cg13369817	0.689477	0.264746	0.424731	1.49135e-07	5.31382e-06	C1orf175	Body	opensea
1935	cg11153694	0.561487	0.136783	0.424703	3.95932e-06	8.51658e-05	RELL2	1stExon	shore
1936	cg11011533	0.80571	0.381065	0.424645	6.74549e-08	2.70527e-06	ITGAE	Body	opensea
1937	cg26068079	0.43386	0.858487	-0.424627	8.95937e-05	0.00116427	NRG1	Body	opensea
1938	cg05424060	0.826534	0.401933	0.424601	3.77189e-09	2.28973e-07	GNAI1	Body	shelf
1939	cg15883181	0.836122	0.411564	0.424558	4.38889e-11	4.87051e-09	RNF213	Body	opensea
1940	cg00804392	0.854493	0.429963	0.424531	6.99132e-08	2.789e-06	RHOH	5'UTR	opensea
1941	cg08903425	0.64767	0.22323	0.42444	0.000148508	0.00177827	CACNA1E	Body	opensea
1942	cg13474370	0.734541	0.31012	0.424421	3.23331e-09	2.00638e-07	RBPMS2	TSS1500	shore
1943	cg14826797	0.819909	0.395501	0.424407	1.20797e-07	4.44465e-06	TARS	Body	shelf
1944	cg23330212	0.904168	0.479773	0.424396	1.42655e-08	7.12381e-07	BDNFOS	Body	opensea
1945	cg07006673	0.86271	0.438333	0.424377	4.21299e-09	2.51964e-07	HNF4A	TSS200	opensea
1946	cg13700197	0.908689	0.484401	0.424289	2.508e-11	3.01714e-09	PTCH1	Body	opensea
1947	cg08119231	0.0594101	0.483613	-0.424203	2.15878e-13	5.1993e-11	MOSC2	TSS1500	shore
1948	cg09679862	0.464094	0.888281	-0.424186	3.70285e-06	8.05105e-05	CORO1C	Body	opensea
1949	cg18120259	0.869744	0.445601	0.424143	2.19172e-07	7.37149e-06	LOC100132354	Body	opensea
1950	cg07720926	0.44241	0.866506	-0.424096	5.11683e-05	0.000728367	NHSL1	Body	opensea
1951	cg25252197	0.690737	0.26665	0.424087	6.12384e-05	0.000847234	RBM20	Body	opensea
1952	cg27315635	0.786668	0.362582	0.424086	7.83831e-09	4.28454e-07	KCNJ9	TSS1500	shelf
1953	cg08636620	0.835529	0.411453	0.424076	1.33422e-05	0.000235314	LRRC17	TSS1500	opensea
1954	cg12328660	0.690946	0.266914	0.424032	2.79517e-05	0.000438088	GPR156	Body	opensea
1955	cg24451117	0.788267	0.364255	0.424012	1.83402e-12	3.18369e-10	MAP3K5	Body	opensea
1956	cg16678925	0.245297	0.669284	-0.423987	4.92304e-08	2.06384e-06	OR1A2	1stExon	opensea
1957	cg26607785	0.582554	0.158621	0.423933	4.33008e-05	0.000633529	TBX21	TSS200	shore
1958	cg22935422	0.912753	0.488882	0.423872	2.32833e-10	2.05722e-08	PDE7B	Body	opensea
1959	cg22465736	0.685344	0.261475	0.423869	1.56577e-06	3.89379e-05	SPAG5	TSS1500	shore
1960	cg23184226	0.772349	0.348554	0.423795	1.24731e-06	3.21168e-05	TECPR1	5'UTR	shore
1961	cg04314308	0.760395	0.336635	0.42376	1.25909e-06	3.23731e-05	NCAN	Body	island
1962	cg26120787	0.779312	0.355561	0.42375	3.21218e-06	7.13178e-05	PDE11A	Body	opensea
1963	cg00563678	0.823347	0.399619	0.423728	4.60475e-09	2.71297e-07	RNF150	Body	opensea
1964	cg14553895	0.708094	0.28439	0.423704	4.28654e-05	0.000628376	PIK3CA	5'UTR	opensea
1965	cg24147187	0.752578	0.32888	0.423699	6.35469e-07	1.81573e-05	VSTM2L	Body	shelf
1966	cg01176028	0.770678	0.347066	0.423612	1.25267e-10	1.20807e-08	ABCG1	Body	shore
1967	cg06644051	0.573465	0.149885	0.42358	2.59348e-05	0.000411177	C7orf52	Body	island
1968	cg17516156	0.894353	0.470885	0.423468	9.14177e-11	9.23777e-09	INPP1	TSS1500	shore
1969	cg04892643	0.823929	0.400521	0.423408	2.89701e-06	6.54376e-05	HDAC9	Body	opensea
1970	cg17649671	0.938464	0.515073	0.423391	6.91917e-12	1.00607e-09	MINPP1	Body	opensea
1971	cg26738530	0.870442	0.447111	0.42333	3.457e-08	1.5236e-06	THSD4	Body	opensea
1972	cg01720186	0.446016	0.0227325	0.423284	0.000549112	0.00529286	MCF2L2	Body	shore
1973	cg23670353	0.19977	0.623048	-0.423278	8.90857e-08	3.42489e-06	FGGY	Body	opensea
1974	cg22233512	0.791717	0.368464	0.423253	1.05855e-06	2.79787e-05	MSI2	Body	opensea
1975	cg11615509	0.783811	0.360605	0.423206	2.33395e-07	7.7647e-06	SHROOM3	Body	opensea
1976	cg13475877	0.841358	0.418168	0.423189	5.36683e-08	2.22358e-06	LYN	Body	opensea
1977	cg17684207	0.807922	0.384764	0.423157	1.24625e-06	3.20957e-05	LOC285796	TSS1500	opensea
1978	cg21152981	0.872	0.448862	0.423137	1.61059e-10	1.50797e-08	TMCO3	5'UTR	shelf
1979	cg04039397	0.797605	0.374475	0.42313	1.61016e-06	3.98718e-05	CD96	TSS200	opensea
1980	cg01484915	0.874536	0.451418	0.423117	4.07941e-08	1.75063e-06	RASSF4	5'UTR	shelf
1981	cg18407095	0.831261	0.408252	0.423009	3.17945e-11	3.69311e-09	CIB4	Body	opensea
1982	cg24243914	0.806356	0.38341	0.422946	2.92517e-06	6.5975e-05	PAPSS2	TSS1500	shore
1983	cg09941363	0.621979	0.19904	0.422939	0.000463868	0.004602	RNF11	Body	opensea
1984	cg18865990	0.147058	0.569975	-0.422917	1.38797e-08	6.95588e-07	SLC25A30	Body	opensea
1985	cg26800803	0.484556	0.0616775	0.422879	1.6377e-05	0.0002797	FOXK1	Body	island
1986	cg15827285	0.81501	0.392201	0.422809	1.302e-06	3.32772e-05	RNASEN	Body	opensea
1987	cg14412134	0.720929	0.298132	0.422797	1.00479e-06	2.67729e-05	MTHFD1	Body	opensea
1988	cg09462956	0.764888	0.342145	0.422744	1.48388e-06	3.71894e-05	SLC9A3R2	Body	shelf
1989	cg00961640	0.906024	0.483292	0.422732	2.74321e-11	3.26379e-09	SLC16A4	TSS200	opensea
1990	cg20454002	0.292058	0.714762	-0.422704	9.15087e-06	0.000171893	HLX	Body	shore
1991	cg14531665	0.906481	0.483792	0.422688	6.89132e-17	6.30322e-14	SPIN1	Body	opensea
1992	cg13606889	0.885941	0.463269	0.422672	5.56344e-14	1.60165e-11	SORL1	Body	opensea
1993	cg25143235	0.527278	0.104611	0.422667	1.19722e-05	0.000215255	CHD5	Body	island
1994	cg05551114	0.355633	0.778233	-0.422599	3.02e-05	0.00046804	C1QTNF7	Body	opensea
1995	cg04272613	0.776246	0.353687	0.422559	1.13225e-08	5.85038e-07	DAAM1	5'UTR	opensea
1996	cg21229979	0.77055	0.348056	0.422495	8.95159e-08	3.43941e-06	LOC285796	TSS1500	opensea
1997	cg04712321	0.707909	0.285436	0.422472	2.60707e-05	0.000413117	ENTPD4	5'UTR	shore
[truncated: 21,025 more rows]

## Sheet: Table S2
Supplementary Table S2
Genes differentially expressed in NFPAS and normal pituitary
nr	genenames	Refseq	Fold change	Adj. P_value
1	SNORA31	NR_002967	0.00595768051665177	7.38349119816682E-36
2	SNORA8	NR_002920	0.0277110949176832	1.16622888461849E-35
3	SNORA14B	NR_002956	0.0159050825296467	3.21078351891989E-34
4	SNORA6	NR_002325	0.0245571921364201	1.49773895753629E-30
5	USP5	NM_001098536	0.11409241296735	1.91821550703235E-30
6	SNORA70	NR_000011	0.0407411187500387	2.49061814498926E-30
7	SNORA34	NR_002968	0.0550500173817629	1.59717207140579E-28
8	SNX19	NM_014758	6.23906378583016	3.10445228233288E-28
9	STX12	NM_177424	18.9670402993217	7.21421771625143E-28
10	SNORA42	NR_002974	0.0459948082411306	9.84505832082741E-28
11	C6orf47	NM_021184	0.254674526102619	4.57858083510575E-26
12	FBXO16	NM_172366	0.217185064840879	3.50626322979148E-25
13	SNORA10	NR_002327	0.0207399211172845	1.34593460943065E-24
14	SNORA59A	NR_003025	0.105727324929899	1.34593460943065E-24
15	OCRL	NM_000276	39.9640095882268	2.29386799923096E-24
16	SNORA74A	NR_002915	0.00799914560846422	2.29386799923096E-24
17	PPP2CA	NM_002715	14.0722467005476	2.96776116191635E-24
18	SNORA2A	NR_002950	0.0570540346467875	4.07604202972577E-24
19	SNORA57	NR_004390	0.0389955472157919	1.26516436363332E-23
20	SNORA21	NR_002576	0.0616865202674154	2.85667483703917E-23
21	SNORA84	NR_003704	0.0639833219183827	2.92612500445397E-23
22	FAM200B	NM_001145191	6.18637308305034	5.09600212788604E-23
23	SNORA71C	NR_003017	0.0709216912129768	1.44402963237346E-22
24	ZNF224	NM_013398	0.203306837321782	3.39989285016542E-22
25	USP30	NM_032663	5.63806536171098	4.31368762436689E-22
26	SNORA67	NR_002912	0.0645770830150296	6.61651333687216E-22
27	EIF4B	NM_001417	12.7807199154024	1.43126102657098E-21
28	SNORD17	NR_003045	0.0314909931207779	1.52265065808294E-21
29	RPLP1	NM_001003	0.163958354849184	2.5955805064035E-21
30	TFE3	NM_006521	0.218891548597264	3.06251008940882E-21
31	HIST2H2AB	NM_175065	0.14520142505746	3.66650271788324E-21
32	HIST1H2AC	NM_003512	9.26989000579221	5.39559096690536E-21
33	RNU12	NR_029422	0.0285300157806539	1.11863985055366E-20
34	TMEM50A	NM_014313	6.53497717177692	1.5984263896601E-20
35	HIST1H1C	NM_005319	9.99675771647178	1.8673101801109E-20
36	SNORA71A	NR_002911	0.0716440659677512	2.07173710684975E-20
37	GPBP1L1	NM_021639	0.282805479027647	2.27126453569268E-20
38	ZNF445	NM_181489	3.63821940391466	2.27126453569268E-20
39	PRICKLE2	NM_198859	7.77040216009984	2.67952435129563E-20
40	SNORA71B	NR_002910	0.0699824671451716	4.05931057300242E-20
41	NKIRAS1	NM_020345	7.31326787045777	5.11618685662677E-20
42	SNORA33	NR_002436	0.0738426557844793	5.51430135781391E-20
43	SNORA68	NR_000012	0.0621259340930041	6.24613372291411E-20
44	SNORA66	NR_002444	0.0752038264821596	6.24613372291411E-20
45	HDAC6	NM_006044	0.14838870522518	6.77353168085957E-20
46	RPL8	NM_000973	5.84140871542212	6.94696587288887E-20
47	RNF19B	NM_153341	4.9033492541918	7.78694636088212E-20
48	MAPK8IP2	NM_016431	5.1911542460942	8.76681701876115E-20
49	RPS5	NM_001009	0.191801060987944	2.22002872161238E-19
50	SNHG12	NR_003035	0.0435966012786862	2.22002872161238E-19
51	CWC25	NM_017748	0.31575785588648	2.31768062133868E-19
52	SNORA49	NR_002979	0.0914409741695173	2.44227990351858E-19
53	SNHG7	NR_002975	0.0763637720579167	2.67699454163294E-19
54	MSI2	NM_138962	0.360083740932845	2.81000302839143E-19
55	NSRP1	NM_032141	13.406683280793	2.98703256778723E-19
56	MED6	NM_005466	3.85451123321693	3.99589630296335E-19
57	MDH1	NM_001199111	7.06578826999389	4.3646568067737E-19
58	ARL6IP1	NM_015161	10.9841273903807	1.02265125626096E-18
59	RILPL1	NM_178314	8.37654109423505	1.02265125626096E-18
60	SNORA71D	NR_003018	0.0475649621452112	1.02265125626096E-18
61	HIST1H4K	NM_003541	0.0558082435772218	1.03188100645674E-18
62	VDAC3	NM_005662	4.81523940869119	1.05563855258621E-18
63	IPP	NM_005897	9.28266291818789	1.05563855258621E-18
64	PHAX	NM_032177	4.44586051221632	1.3424874642916E-18
65	OSTC	NM_021227	0.214017283681682	1.518797512269E-18
66	TMEM248	NM_017994	6.02612505565984	1.58138437486571E-18
67	PPP1R14B	NM_138689	0.178288270147807	1.64077962731004E-18
68	SNORA55	NR_002983	0.0997222671252107	1.78489332566535E-18
69	DNAJC8	NM_014280	4.64270584362547	1.9726354100277E-18
70	KLHL22	NM_032775	0.279648117612816	2.11666454139206E-18
71	KIF5B	NM_004521	5.095435105919	2.67126165225102E-18
72	TIAF1	NM_004740	0.113020185911609	3.20802730254504E-18
73	GREB1	NM_014668	0.0481837866173636	4.24099436097831E-18
74	SNORA62	NR_002324	0.0500132934938319	7.36581932410445E-18
75	GLOD4	NM_016080	6.01383648643376	8.89577536243899E-18
76	PVR	NM_006505	0.268592123553138	1.51388497929292E-17
77	COA1	NM_018224	0.307193932315899	1.82037926859279E-17
78	YIF1A	NM_020470	0.217786529893287	2.09845213464167E-17
79	HMGB1	NM_002128	10.1539788453321	2.21505480791655E-17
80	SNORA30	NR_002966	0.105659238569659	2.46751978289922E-17
81	SNORA50	NR_002980	0.0470502636813977	2.47083937048085E-17
82	TPM3	NM_152263	3.77945939395884	3.691454392584E-17
83	SNORA1	NR_003026	0.047231732611871	3.7046072677366E-17
84	CREBZF	NM_001039618	0.196825218850252	3.91443067698589E-17
85	RAB1A	NM_004161	6.86933847908511	5.57735836626397E-17
86	RCAN1	NM_004414	0.138277796033443	6.66508713192864E-17
87	NUPL2	NM_007342	0.374781511525715	7.53293325131224E-17
88	ANKRD16	NM_019046	0.175939125948333	9.7554059578713E-17
89	MXD1	NM_002357	9.02812888654883	1.30399106368076E-16
90	SNHG8	NR_002963	0.0492976460153824	1.89253286561372E-16
91	NONO	NM_001145409	7.88570785770817	2.52030420260011E-16
92	SNORA38	NR_002971	0.0440137052135088	2.99115988912274E-16
93	MST4	NM_016542	23.8085736565949	3.32250511893367E-16
94	PNKP	NM_007254	0.215819157371084	3.98631854421614E-16
95	TXNDC16	NM_020784	11.3703718407316	3.98631854421614E-16
96	GPATCH4	NM_182679	8.02293999979944	4.43429471438185E-16
97	TXNDC9	NM_005783	5.02601861807246	4.52738034704321E-16
98	HEATR6	NM_022070	4.17083679852294	5.2947170028605E-16
99	SNORA14A	NR_002955	0.020266166480353	5.2947170028605E-16
100	HNRNPH2	NM_001032393	4.29686243368391	5.59426789245351E-16
101	SNORD94	NR_004378	0.0592680320239068	5.59426789245351E-16
102	EMC3	NM_018447	0.403924600118061	6.60858070934493E-16
103	C19orf73	NM_018111	0.128325182146062	6.87961832150444E-16
104	ZNF362	NM_152493	4.47060775845057	6.88970770598835E-16
105	CLCN2	NM_004366	0.241131551145062	7.5838420403885E-16
106	RPN1	NM_002950	0.179784217159053	8.07322890000901E-16
107	RBM7	NM_016090	3.84121393326214	9.02502463094639E-16
108	SNORD15A	NR_000005	0.0798510964842744	9.14894681208276E-16
109	ASH2L	NM_004674	5.0239277388677	9.51889186966255E-16
110	SNORA12	NR_002954	0.0899709125246756	1.06943674990405E-15
111	FAU	NM_001997	0.231875346764149	1.07246946541438E-15
112	CENPB	NM_001810	0.263102305671944	1.11275123792085E-15
113	NCOR2	NM_006312	0.226590218654792	1.12640777952163E-15
114	C21orf59	NM_021254	3.6936069258597	1.17206864046656E-15
115	CNIH4	NM_014184	0.310396653250431	1.21565174339758E-15
116	RPS6KA2	NM_001006932	0.051471793498932	1.33488632050997E-15
117	LCMT2	NM_014793	0.272336149799906	1.40255738501875E-15
118	STX7	NM_003569	2.83646164683463	1.47278549918499E-15
119	COMMD2	NM_016094	5.31211013148142	1.48443861955121E-15
120	EBLN2	NM_018029	0.12516452730509	1.51012006145583E-15
121	ATP6V0B	NM_004047	6.69085631737545	1.5206655703195E-15
122	NECAP1	NM_015509	4.11599112640684	1.62692899975253E-15
123	PHF2	NM_005392	3.03111874178563	2.18016758748901E-15
124	MAP3K4	NM_005922	8.14884323045105	2.44957910306819E-15
125	SNORA41	NR_002590	0.0484384216425407	2.55313041469548E-15
126	FAF2	NM_014613	20.7792675289745	2.73012950938487E-15
127	WNK2	NM_006648	0.232360017327952	3.04243393862145E-15
128	HIST1H4J	NM_021968	0.065543910333853	3.09785506012687E-15
129	CEP120	NM_153223	7.61069931524046	3.16228014325426E-15
130	BTD	NM_000060	3.80878149829137	3.30884732613936E-15
131	ILK	NM_004517	0.27067263173645	4.82851080227959E-15
132	ITGB1BP1	NM_004763	0.338742698970462	4.94896999974376E-15
133	SNORA56	NR_002984	0.104350265391292	5.00119696831883E-15
134	NFKBIL1	NM_005007	0.26577760193801	5.55977498690365E-15
135	PEX19	NM_001193644	6.06514950957431	6.04873423755464E-15
136	NUDT18	NM_024815	0.103536012709303	6.04873423755464E-15
137	NBR1	NM_005899	0.447531808533526	6.07400846945733E-15
138	CNTN1	NM_001843	5.88258370376079	6.31063836026344E-15
139	KIAA1715	NM_030650	6.45639089872253	6.82230752598715E-15
140	SPAG7	NM_004890	4.2150283107475	7.03952250768855E-15
141	YPEL3	NM_001145524	0.263494149680668	9.27303321385822E-15
142	AKR1A1	NM_153326	0.217336536376584	1.09260155342879E-14
143	SNORA81	NR_002989	0.0568195204237988	1.44104753674928E-14
144	BLVRA	NM_000712	5.18091428462701	1.45856250620446E-14
145	RPLP0	NM_001002	0.225463531258552	1.55887008384466E-14
146	PFDN1	NM_002622	4.37158603826791	1.94366422407688E-14
147	SNORA52	NR_002585	0.0759295666384188	1.94366422407688E-14
148	WBP1L	NM_001083913	0.238665372214287	2.23907068971879E-14
149	SMNDC1	NM_005871	2.94799663372438	2.33244590787336E-14
150	CAPZA2	NM_006136	6.05643160982038	2.3476514521036E-14
151	TUBB4B	NM_006088	24.0598782009254	2.55843265449368E-14
152	POLR1C	NM_203290	0.312676939353723	2.6165056565009E-14
153	ARID3A	NM_005224	0.158215922128505	2.61965849781591E-14
154	XRCC5	NM_021141	0.43378586686117	2.62331632943109E-14
155	PEG3	NM_001146184	10.7997618214787	2.6520774010344E-14
156	SOS2	NM_006939	14.4181674053277	2.79872774285409E-14
157	SDHB	NM_003000	4.91736340966067	2.86278933276935E-14
158	APMAP	NM_020531	0.185686690385313	2.91806509263905E-14
159	SNORA5A	NR_002919	0.0420364800764481	2.91806509263905E-14
160	HIATL1	NM_032558	3.97756678020276	3.1458583761678E-14
161	ARHGEF11	NM_198236	4.52515741357593	3.90739640564037E-14
162	C15orf41	NM_001130010	0.228024128432153	4.43198760662203E-14
163	SAE1	NM_005500	5.05590216119948	4.44934643394764E-14
164	SPOP	NM_001007228	4.20789945143124	4.45054660245876E-14
165	MKNK1	NM_003684	0.142537545706316	5.90952342754426E-14
166	PSPH	NM_004577	0.322290341234074	5.93306336230106E-14
167	ZDHHC17	NM_015336	3.35488322128636	5.93306336230106E-14
168	SNORA70G	NR_033335	0.133041078674595	6.5772544222448E-14
169	FAM185A	NM_001145268	0.17331832443242	8.31080337327733E-14
170	GTF2H4	NM_001517	0.248846889831901	8.34929362970987E-14
171	DNAJB4	NM_007034	9.92466705792112	8.46126277171889E-14
172	FAM122A	NM_138333	0.329311664066832	8.81057457458264E-14
173	SERINC3	NM_198941	2.44207412667228	8.98621454960865E-14
174	FAM57A	NM_024792	0.245158407283252	9.03082593564314E-14
175	THUMPD2	NM_025264	4.45949688529626	9.07369781772095E-14
176	SNORA47	NR_003014	0.0790399767044529	9.10513781818374E-14
177	HIST1H2AD	NM_021065	0.140593548900268	1.01285820057707E-13
178	SUCLA2	NM_003850	8.81206834645104	1.02373753156143E-13
179	PARD6A	NM_016948	0.21094584460706	1.09171494411538E-13
180	MRPS17	NM_015969	3.73972211496569	1.1203578268054E-13
181	VIPAS39	NM_001193315	0.236332141677992	1.37923058917642E-13
182	CHGB	NM_001819	0.111393871457457	1.44000576821795E-13
183	TRAPPC3	NM_014408	6.00540309165814	1.53886812480994E-13
184	RWDD2B	NM_016940	4.21037406924502	1.78334419440002E-13
185	ABHD16B	NM_080622	0.207106064646034	1.93865584173143E-13
186	SIRT2	NM_012237	5.25966511782497	2.18698657629598E-13
187	RBM23	NM_001077351	3.73371255019524	2.23232700931731E-13
188	WDR36	NM_139281	6.05739888990302	2.23232700931731E-13
189	PPIA	NM_021130	4.53882608613129	2.23409071948234E-13
190	PDE7B	NM_018945	10.3285057233419	3.07279790316544E-13
191	SNX2	NM_003100	4.24821531271101	3.13994857831136E-13
192	TMBIM6	NM_001098576	2.52044269663445	3.60994421391539E-13
193	SEC11A	NM_014300	10.4513293427015	3.93826338035201E-13
194	UBE2M	NM_003969	0.342672201911289	5.19548466654109E-13
195	FAM73A	NM_198549	5.0840314517627	5.2693171513535E-13
196	DYNC1H1	NM_001376	0.338213232521486	5.51003377805907E-13
197	SRCAP	NM_006662	0.395836330430527	5.63194448951094E-13
198	MAPK1	NM_002745	2.65571511073203	5.69807929672585E-13
199	UTP11L	NM_016037	5.60426493488534	6.26394070701103E-13
200	SNORA74B	NR_002988	0.0840451073984409	6.48680226336844E-13
201	ZNF112	NM_001083335	0.303036895000789	6.74635809362875E-13
202	RPL32	NM_001007074	0.248653861117624	6.86941885769939E-13
203	PNPT1	NM_033109	0.385586788692402	7.64987414245067E-13
204	SNORA63	NR_002586	0.11723264330076	7.93791556372348E-13
205	GPN3	NM_001164372	5.10817417042187	8.04004570261214E-13
206	CCDC91	NM_018318	4.03728107359476	8.3619491719955E-13
207	HMOX2	NM_002134	0.164231858384646	9.94199609032238E-13
208	BCLAF1	NM_014739	2.77028604215735	1.01549976625718E-12
209	NELFCD	NM_198976	0.33731413190948	1.05811636830607E-12
210	PDHB	NM_000925	5.64722491927667	1.08136132369888E-12
211	LUZP1	NM_001142546	3.31777456590951	1.08136132369888E-12
212	CADM1	NM_014333	4.52788151566119	1.15329066184865E-12
213	PKIG	NM_007066	4.68637564561101	1.48244412752183E-12
214	HPDL	NM_032756	0.117068477367945	1.4861635370405E-12
215	COX16	NM_016468	3.11550921421749	1.54846297525789E-12
216	CC2D1A	NM_017721	0.335752401404706	1.76803067806142E-12
217	TIMM8A	NM_004085	5.51574679745254	1.77953115049736E-12
218	ARSA	NM_001085425	3.97238361439887	1.80766758416818E-12
219	ARFRP1	NM_003224	2.83219975407542	1.80766758416818E-12
220	RANBP3	NM_007322	0.467033404025814	1.8204220816566E-12
221	ZNF547	NM_173631	0.26729734004297	1.82351167916747E-12
222	RC3H1	NM_172071	0.422363876483585	1.8456075191072E-12
223	NCKAP1	NM_205842	6.82281771964321	1.98049938002957E-12
224	PRDX4	NM_006406	0.119150569433743	2.22492787022491E-12
225	KTI12	NM_138417	0.295930709652566	2.4474698067438E-12
226	SEP15	NM_203341	4.84148576441578	2.56940272533302E-12
227	LENG9	NM_198988	0.0922345320605633	2.57816893119426E-12
228	ATP6V1B2	NM_001693	3.73674171508613	2.64168643039591E-12
229	LDOC1L	NM_032287	0.225711734395222	2.64168643039591E-12
230	SNORA28	NR_002964	0.0872081130402892	2.64168643039591E-12
231	OTUB1	NM_017670	2.65845154652338	2.79198251742503E-12
232	PDZD4	NM_032512	0.22683531297666	2.92100277340115E-12
233	ESYT2	NM_020728	0.303473050403702	2.93865717891915E-12
234	RSL24D1	NM_016304	5.53972525305609	3.10065160417114E-12
235	GNAI2	NM_002070	0.386942092396364	3.35142319741749E-12
236	SNORA5C	NR_002991	0.196806254431503	3.62649095350143E-12
237	ZBTB7A	NM_015898	0.327938703663013	3.80323575986088E-12
238	OSBPL6	NM_001201480	4.62114618934457	4.1275723836285E-12
239	SELT	NM_016275	4.62744861867137	4.15877282760516E-12
240	KDM1A	NM_001009999	6.22626499884856	4.17506717996403E-12
241	ICA1L	NM_138468	7.63582612335094	4.31327417995334E-12
242	SECISBP2L	NM_001193489	4.46529925533731	4.5054498785321E-12
243	ZNF585A	NM_152655	0.366997092083675	4.88477618768596E-12
244	RING1	NM_002931	0.290374911323199	5.23459967242759E-12
245	GTPBP10	NM_033107	3.17123776991206	5.47444399484362E-12
246	PCNX	NM_014982	0.287127658508299	5.62326773899086E-12
247	SLC9B2	NM_178833	5.71021488916896	5.7218734377902E-12
248	BRSK1	NM_032430	0.296632910485193	5.8199304158811E-12
249	STAT1	NM_007315	3.3687151658722	5.98900243554365E-12
250	HDAC5	NM_001015053	0.352036582777986	6.54729471823066E-12
251	ALDH6A1	NM_005589	0.208129390428501	6.5592391085842E-12
252	ZSCAN30	NM_001112734	4.48642224041703	6.58781488863053E-12
253	MRPS35	NM_021821	3.45425150373496	6.58781488863053E-12
254	DIP2B	NM_173602	4.30814377858066	7.11305910453295E-12
255	AKR7A3	NM_012067	0.192528223801836	7.2439498078259E-12
256	KIAA1211	NM_020722	16.9285574785956	7.24675281294432E-12
257	DDX28	NM_018380	0.281156953042832	7.55036838386725E-12
258	PKD1	NM_001009944	0.275658173851116	7.59739224905324E-12
259	MRPL3	NM_007208	3.02271315691392	7.71682261660386E-12
260	MARCH8	NM_001002266	2.5539990638696	8.29985409181214E-12
261	TBC1D22B	NM_017772	2.27167021275474	8.44869084561232E-12
262	EIF3G	NM_003755	0.304437945964693	8.94954893485294E-12
263	C1D	NM_006333	9.33837171021333	9.59231232294679E-12
264	RFC5	NM_007370	14.8418645657452	9.68601159729844E-12
265	ERLIN1	NM_001100626	12.2546797700154	9.70849287062795E-12
266	YIPF4	NM_032312	7.06307951929686	9.93401861725683E-12
267	KRTAP5-1	NM_001005922	0.104324650366969	1.04351656024321E-11
268	SNHG11	NR_002972	0.179933439813259	1.10260030893093E-11
269	HIGD1A	NM_001099668	5.70718036173357	1.1518269091748E-11
270	LAT	NM_001014989	0.124098509552074	1.23996841859531E-11
271	TCEAL8	NM_001006684	7.55190068436459	1.26499571832296E-11
272	PNO1	NM_020143	5.66033880476263	1.2870076550059E-11
273	PIGS	NM_033198	3.39725538524763	1.3705223194349E-11
274	ZNHIT6	NM_017953	8.13401762059699	1.39517103357046E-11
275	QTRT1	NM_031209	0.247124158680327	1.40350302276137E-11
276	C14orf178	NM_174943	0.255318200473673	1.53588532594525E-11
277	PAK4	NM_001014832	0.276970738144756	1.65491951470476E-11
278	TRIM27	NM_006510	0.327805520649721	1.71925219550491E-11
279	SF1	NM_001178030	6.1644424484579	1.90383099649128E-11
280	SDCBP	NM_001007067	7.71014344597865	1.92183964823004E-11
281	SPCS1	NM_014041	0.319781187767202	2.03739931663967E-11
282	SAFB	NM_001201338	2.45555368586546	2.0386579485758E-11
283	YY2	NM_206923	0.256160658422881	2.06063340738846E-11
284	RAB8A	NM_005370	2.23449331167794	2.12620957910137E-11
285	IFT20	NM_174887	0.371077403293634	2.32708661153666E-11
286	TADA2B	NM_152293	0.294252963098165	2.33606181456398E-11
287	CEP41	NM_018718	4.20809799322788	2.36078621775621E-11
288	CHMP1A	NM_002768	4.15895944889757	2.50555305124281E-11
289	IZUMO4	NM_001039846	0.11441772927009	2.57534796882071E-11
290	HSP90AA1	NM_001017963	4.99983888068491	2.88282587514573E-11
291	ARMCX6	NM_001009584	7.0381563750459	2.96640484259691E-11
292	SGCB	NM_000232	4.40563098028401	3.02927999735208E-11
293	KRT222	NM_152349	6.00683831114605	3.07920554795832E-11
294	ZNF571	NM_016536	0.199625610320057	3.12834352135268E-11
295	TYK2	NM_003331	0.334494965156007	3.15124843122123E-11
296	AGO4	NM_017629	0.361150437356692	3.21017239186412E-11
297	TBC1D2B	NM_144572	29.9096215872542	3.52181328667305E-11
298	LEPROTL1	NM_001128208	4.20131306538806	3.6540526998935E-11
299	CSAD	NM_015989	0.170399241171293	3.69674765178746E-11
300	HEATR2	NM_017802	0.309951049939793	4.0330502637412E-11
301	AGO3	NM_024852	0.282461364062588	4.17691507589723E-11
302	GRINA	NM_000837	3.81704838778852	4.19969056987612E-11
303	CCNI	NM_006835	2.88055667217925	4.59846577610565E-11
304	SLC25A12	NM_003705	4.07141804984662	4.73537553859026E-11
305	ZNF324	NM_014347	0.374133055162816	4.88740934848919E-11
306	MAPRE3	NM_012326	14.6120577463782	5.10440392157764E-11
307	POU2F1	NM_002697	7.00472958655872	5.39140497486227E-11
308	ZNF782	NM_001001662	0.376916127595135	5.4350475279939E-11
309	HCFC2	NM_013320	4.84699370334976	5.4350475279939E-11
310	DDX52	NM_007010	3.58919957728162	5.67942987884497E-11
311	AKAP6	NM_004274	5.04660208826852	5.80755613512952E-11
312	ZNF275	NM_001080485	19.1789055379646	5.88891845345131E-11
313	STX8	NM_004853	0.346749431727481	6.0069047184087E-11
314	TCIRG1	NM_006019	0.0508469631570624	6.28494966907377E-11
315	C8orf37	NM_177965	14.8259674727941	6.49195946659121E-11
316	RAVER2	NM_018211	0.373044561485908	6.55373352736697E-11
317	RPL7A	NM_000972	0.375568268602092	6.56976870971609E-11
318	BRMS1L	NM_032352	4.76736692732294	7.0297567013935E-11
319	ATP6V0C	NM_001198569	3.51110023674775	7.10343171435316E-11
320	DYNLT1	NM_006519	0.302145718357308	7.10343171435316E-11
321	ZNF526	NM_133444	0.405926739683606	7.14942670974762E-11
322	CCDC153	NM_001145018	0.21356804663835	7.24183436932164E-11
323	USP1	NM_001017416	9.0145995769562	7.48043338361349E-11
324	OR10AD1	NM_001004134	0.150644793282064	7.66498559091192E-11
325	RPS18	NM_022551	0.377680077297165	7.77603134312496E-11
326	NUP205	NM_015135	4.82910572532753	8.09067724141103E-11
327	IP6K2	NM_001005909	4.02993703276688	8.1014277162111E-11
328	NDUFB11	NM_019056	0.360111962359668	8.1926217583098E-11
329	RPL13A	NM_012423	0.361092555402841	8.23835850832048E-11
330	CXorf40B	NM_001013845	0.344398103932591	8.83276017631901E-11
331	BRK1	NM_018462	2.55715355238038	8.83276017631901E-11
332	SEC16A	NM_014866	0.337836030734117	9.83209453124228E-11
333	PRPF4	NM_004697	3.88240908350993	9.89222277941487E-11
334	C14orf1	NM_007176	2.94774177529955	1.01920088701846E-10
335	C16orf86	NM_001012984	0.262540725225511	1.02897615155699E-10
336	KPNA6	NM_012316	3.20704246155453	1.02897615155699E-10
337	ME3	NM_001014811	0.241080582951167	1.15808877819829E-10
338	FRMD4B	NM_015123	11.8345133646566	1.18798904121599E-10
339	MRPS30	NM_016640	3.52448309858977	1.26510764495465E-10
340	ABCB6	NM_005689	0.262659222827018	1.27382324323044E-10
341	SNORA46	NR_002978	0.0396251652660409	1.35119193834296E-10
342	PACRGL	NM_145048	0.3173705050876	1.37672262436485E-10
343	FAH	NM_000137	0.15667814099364	1.38181835304077E-10
344	RRAS2	NM_012250	0.312169695814657	1.40817540784192E-10
345	INVS	NM_014425	0.319727342473516	1.40817540784192E-10
346	RSPH1	NM_080860	0.236323591671815	1.45991367167015E-10
347	TWSG1	NM_020648	2.71004766875891	1.46112412085552E-10
348	VARS	NM_006295	0.302317661613715	1.46823145165747E-10
349	TREX1	NM_016381	0.0896827494859315	1.50552784088493E-10
350	SAMD8	NM_001174156	2.56043804860648	1.50796724946845E-10
351	AC002365.1	NM_001195081	0.127561607324491	1.51474383690311E-10
352	ANKIB1	NM_019004	4.09656930727374	1.51474383690311E-10
353	SNRPD1	NM_006938	3.36984743660095	1.53762904617779E-10
354	DLAT	NM_001931	3.77383486997641	1.544295548565E-10
355	TM9SF3	NM_020123	3.47170590654938	1.57131322006633E-10
356	TRPT1	NM_001160389	0.347061153668601	1.59333224284933E-10
357	SMPD2	NM_003080	0.288947940735942	1.63194362741962E-10
358	SDE2	NM_152608	2.46552549073409	1.63194362741962E-10
359	ACTR3	NM_005721	6.00481675159523	1.66583729565482E-10
360	HSPA1A	NM_005345	0.0810391355497333	1.69681988681218E-10
361	FOXK1	NM_001037165	0.30480386959616	1.71889702945256E-10
362	MED10	NM_032286	3.91448580201623	1.77236515536726E-10
363	ATP2A2	NM_170665	4.3916871473504	1.83444084872635E-10
364	KLHL42	NM_020782	0.325148534235338	1.83742374162078E-10
365	EXTL2	NM_001439	4.54205941289917	1.84570614036431E-10
366	RNF113A	NM_006978	0.371066085433964	2.03224463906873E-10
367	GPR153	NM_207370	0.175689532170778	2.08489021984142E-10
368	OAZ2	NM_002537	8.30328728250991	2.10688153195558E-10
369	LZTFL1	NM_020347	0.34734628263113	2.15273421282781E-10
370	CHCHD2	NM_016139	0.284319039222695	2.17790008180091E-10
371	IPO4	NM_024658	0.381406401811417	2.22952037000146E-10
372	SLC25A2	NM_031947	0.0925121131306168	2.42494476804652E-10
373	FEM1B	NM_015322	0.349953788312573	2.43544379485777E-10
374	DPYSL3	NM_001197294	5.77411638936416	2.56087587375301E-10
375	JAGN1	NM_032492	3.15508450474485	2.56087587375301E-10
376	PCBP2	NM_005016	2.40734388461843	2.56579744590602E-10
377	VPS13B	NM_152564	0.335453056919937	2.58745367281049E-10
378	MYEOV2	NM_138336	0.27316148910508	2.71317452842099E-10
379	FUT10	NM_032664	0.330263464257846	2.72931186261802E-10
380	FZR1	NM_001136198	0.371342518462882	2.73192827739185E-10
381	RALBP1	NM_006788	5.70222986607466	2.73894433990485E-10
382	SRRM5	NM_001145641	0.151246675618994	2.8349084456961E-10
383	VPS37A	NM_152415	5.26242002971111	3.20339993481486E-10
384	FCHSD2	NM_014824	4.90980437060492	3.24324197624394E-10
385	NSD1	NM_022455	6.08659569046957	3.24324197624394E-10
386	TBC1D20	NM_144628	0.378249018384346	3.30178775074989E-10
387	CMTR1	NM_015050	3.17252138021962	3.63845773856322E-10
388	SLU7	NM_006425	3.01549642681927	3.74929746762456E-10
389	CIAPIN1	NM_020313	3.98907600558305	3.8472205769471E-10
390	PIH1D1	NM_017916	0.209791473824561	4.01641803172591E-10
391	AATK	NM_001080395	0.316943912965771	4.03562499711389E-10
392	P4HA1	NM_001017962	3.29210261356048	4.49031395572809E-10
393	ELMO3	NM_024712	0.20127222410786	4.49946347866736E-10
394	DDX21	NM_004728	4.14720410333077	4.643582600359E-10
395	KCTD6	NM_001128214	0.373062671877238	4.64836015999098E-10
396	ABCA3	NM_001089	4.15792617863904	4.82407100500595E-10
397	SURF1	NM_003172	0.396478400838698	4.8669707493774E-10
398	NPR2	NM_003995	0.249974460573433	4.99054772294076E-10
399	YEATS2	NM_018023	0.350593165003187	4.99054772294076E-10
400	BFAR	NM_016561	2.46065403720758	5.05209492137813E-10
401	RPS16	NM_001020	0.345224346989037	5.16918445405249E-10
402	DUSP22	NM_020185	0.183879010222744	5.17514880733382E-10
403	PRR12	NM_020719	0.298160289005284	5.34472975686912E-10
404	DDX19A	NM_018332	2.68225458766675	5.40162452896591E-10
405	PITX1	NM_002653	4.84970136596665	5.51532464234298E-10
406	FPGS	NM_004957	0.338544088849532	5.78823861050973E-10
407	GSTM2	NM_001142368	7.15230300780104	5.89591323885347E-10
408	GPR62	NM_080865	0.0941384998830513	6.22396624737084E-10
409	PRPF38B	NM_018061	0.472059771808748	6.28607052898757E-10
410	SRRT	NM_015908	2.65621570328866	6.30426601444574E-10
411	RAB18	NM_021252	3.09101882387305	6.45271611585879E-10
412	PITX2	NM_001204398	10.1737894990629	6.63778936857384E-10
413	C6orf62	NM_030939	6.18274978427224	6.64349669266542E-10
414	BAG6	NM_001098534	0.347142468235807	6.67136951417891E-10
415	ZNF764	NM_033410	0.258930656717463	6.93969759752581E-10
416	WDTC1	NM_015023	3.75207483548749	6.98211118660626E-10
417	TBRG1	NM_032811	0.328666261298448	7.59907197236469E-10
418	STH	NM_001007532	0.111901753124377	7.79646775662168E-10
419	RPL13	NM_000977	0.265593661326689	7.87145697359845E-10
420	PLOD3	NM_001084	3.20839779076981	8.02048495283119E-10
421	PACS2	NM_001100913	0.171921745428417	8.25134119902884E-10
422	WDSUB1	NM_001128212	4.93326590595046	8.4855638633577E-10
423	ESD	NM_001984	6.49333641175917	8.4855638633577E-10
424	CDC34	NM_004359	0.1828232822937	8.99802907038624E-10
425	BCAS3	NM_001099432	0.37982298155075	9.51520730418454E-10
426	HDAC2	NM_001527	4.21757529295462	9.72108760788997E-10
427	RRP36	NM_033112	2.47038185941422	9.72108760788997E-10
428	ARHGEF10	NM_014629	0.136069120518694	9.89764772130609E-10
429	ADIPOR1	NM_015999	2.63083225798791	9.93945866751407E-10
430	IFI44	NM_006417	7.81370866352687	1.04871440744765E-09
431	RAPGEF2	NM_014247	3.24097458373078	1.07607855424666E-09
432	AGAP3	NM_031946	0.42091724823949	1.11942737071846E-09
433	STXBP3	NM_007269	2.43608110185461	1.14475539630158E-09
434	LSM2	NM_021177	0.361359368302667	1.14871285102332E-09
435	ZNF839	NM_018335	0.445393547756462	1.15719949750962E-09
436	ERP44	NM_015051	3.99864794202866	1.17014745260747E-09
437	DIRC2	NM_032839	0.433277690523327	1.2225211198486E-09
438	MYL12B	NM_033546	2.80253420104474	1.22276852761576E-09
439	DCLRE1C	NM_001033855	0.329771880894659	1.23989914466484E-09
440	OSCP1	NM_145047	0.41740290124042	1.25492979199358E-09
441	RAB11FIP1	NM_001002814	0.241800659491784	1.29289225220194E-09
442	DNAJC3	NM_006260	3.55717338712424	1.35209513229816E-09
443	IMPDH2	NM_000884	0.343278188345624	1.35879149031909E-09
444	GPN2	NM_018066	3.52844755570227	1.36288341701628E-09
445	WDR73	NM_032856	0.34330096949471	1.37437508924378E-09
446	CLIP1	NM_002956	3.19076606458699	1.38591935128897E-09
447	TFAM	NM_003201	3.94931426380966	1.41433437249463E-09
448	HSF2	NM_004506	4.20608937052297	1.41433437249463E-09
449	MEST	NM_002402	0.276270982454458	1.43114160692101E-09
450	RSBN1	NM_018364	2.7606793554865	1.44914870974368E-09
451	CBLL1	NM_024814	4.19643813390886	1.44914870974368E-09
452	WDR81	NM_001163809	0.280732611453461	1.49214459790985E-09
453	NT5DC1	NM_152729	4.20515237719616	1.51986354437597E-09
454	THOC5	NM_001002879	0.404795044041274	1.54137407425056E-09
455	ZNF586	NM_017652	0.229069649404094	1.58972132223016E-09
456	SLC25A17	NM_006358	3.66458750304407	1.62474041982984E-09
457	P2RY4	NM_002565	0.139918270240872	1.64545550955249E-09
458	HPS6	NM_024747	0.305497362230965	1.66188474630984E-09
459	PSMD1	NM_002807	2.53412697379635	1.66326317265698E-09
460	POLD4	NM_021173	0.23123237875604	1.66627910348136E-09
461	GET4	NM_015949	0.401506749743514	1.71141304144131E-09
462	ZNF789	NM_213603	0.265529540532476	1.73669305712446E-09
463	RAB40C	NM_001172665	0.301127361596587	1.84395369412779E-09
464	TMUB2	NM_001076674	0.430765188523153	1.85359597614218E-09
465	ARMCX2	NM_014782	0.307874076695259	1.85469382041747E-09
466	ZNF107	NM_001013746	0.423709846658414	1.89376029110011E-09
467	YKT6	NM_006555	0.332396840541951	1.89376029110011E-09
468	KRAS	NM_033360	6.2416716607931	1.9255241354034E-09
469	TMEM209	NM_032842	0.431563927894684	2.11939952920001E-09
470	HEMK1	NM_016173	0.315538429699958	2.12119099733687E-09
471	DBF4	NM_006716	0.27814545481783	2.17536648611906E-09
472	PSMG2	NM_020232	4.03011616001356	2.17995878423933E-09
473	SMURF1	NM_181349	0.297365653509493	2.18578224231409E-09
474	SNX3	NM_003795	5.32322473861266	2.3234584379752E-09
475	ROCK1	NM_005406	6.02313718134802	2.33354720988907E-09
476	NCLN	NM_020170	0.237463230306787	2.35278713521566E-09
477	ASPRV1	NM_152792	0.134355051515132	2.36977570232583E-09
478	TCEB3	NM_003198	3.12737436186437	2.3770038342163E-09
479	CCND2	NM_001759	4.33291809979389	2.42277363350244E-09
480	KCTD5	NM_018992	0.350937565429	2.42580782832596E-09
481	PRCP	NM_005040	3.19768107493236	2.44129101015406E-09
482	SIK2	NM_015191	2.68929975447886	2.46884759770403E-09
483	SLC10A3	NM_001142392	0.276650897367883	2.51994684068702E-09
484	NIPA2	NM_001008892	5.36329944537988	2.65394442841877E-09
485	TTLL4	NM_014640	0.441418461747185	2.65394442841877E-09
486	THAP7	NM_001008695	0.376932872925598	2.72986392272812E-09
487	EAF1	NM_033083	2.20792584864273	2.7690235042282E-09
488	ZNF460	NM_006635	0.272606134063399	2.82764893538112E-09
489	EIF2AK4	NM_001013703	0.365169193966179	2.92941929815101E-09
490	LONP2	NM_031490	0.348974255169334	2.9306912958384E-09
491	TMEM35	NM_021637	11.6097599422599	2.94338689749209E-09
492	SNORA7B	NR_002992	0.130267325355411	2.96675329932206E-09
493	SNRPG	NM_003096	0.361513192689134	2.99485471583585E-09
494	BPNT1	NM_006085	3.06870342929704	3.01434922147438E-09
495	KBTBD2	NM_015483	0.345058522618183	3.2446428042088E-09
496	TMEM161A	NM_017814	3.49868505629757	3.28901703362293E-09
497	PQBP1	NM_001032383	2.66314470260049	3.35271329277255E-09
498	POLR2F	NM_021974	0.30234813225269	3.37630335027055E-09
499	IARS2	NM_018060	2.90803099464279	3.45906234549901E-09
500	TMEM5	NM_014254	4.46627884467824	3.50078339711011E-09
501	ZNF563	NM_145276	0.18733072253244	3.50078339711011E-09
502	RRM1	NM_001033	4.42169758397369	3.62203776058834E-09
503	HMBOX1	NM_001135726	2.87380419263381	3.73945062765291E-09
504	B4GALT2	NM_030587	0.277634625227356	3.73945062765291E-09
505	GNB3	NM_002075	5.98160593790732	3.76458623500298E-09
506	NCSTN	NM_015331	2.87623921080074	3.8789252463726E-09
507	TMEM30A	NM_018247	2.52070947605464	3.8789252463726E-09
508	ARIH1	NM_005744	2.60317508583861	3.9501488324406E-09
509	NOP56	NM_006392	0.4194918591872	4.01924127385734E-09
510	MORN4	NM_001098831	3.14375167412349	4.10838243934749E-09
511	ADPRHL2	NM_017825	4.10598777816497	4.34777927455997E-09
512	TFCP2	NM_005653	2.56212427671083	4.35579301722628E-09
513	SNORA36C	NR_003705	0.104071413284148	4.35859790194534E-09
514	UEVLD	NM_001040697	4.58007906784574	4.64816273561385E-09
515	TBC1D13	NM_018201	4.05361915863943	4.65093233660956E-09
516	LZIC	NM_032368	3.28636358498136	4.80870058210827E-09
517	EPN2	NM_014964	0.311446998951276	4.8329254496236E-09
518	GTPBP8	NM_014170	4.37471991969162	4.89177349858786E-09
519	ZNF644	NM_201269	4.96233795685448	4.89177349858786E-09
520	NUCB2	NM_005013	4.37303165902599	4.89201703799265E-09
521	UBE4A	NM_004788	4.46085157514004	5.13626792502767E-09
522	XPO7	NM_015024	2.52336816083027	5.13626792502767E-09
523	ANKRD10	NM_017664	0.285312534011266	5.13626792502767E-09
524	PHKG2	NM_001172432	0.187688905714894	5.37806631107104E-09
525	EDEM2	NM_018217	0.267698556636689	5.40278859475445E-09
526	CCAR1	NM_018237	2.30830598867067	5.46973057147813E-09
527	TMEM81	NM_203376	0.184924719795419	5.59352355099891E-09
528	USP28	NM_020886	0.312831570781919	5.62270465617992E-09
529	CXXC4	NM_025212	4.29331676016402	5.69766554314103E-09
530	GMPR2	NM_001002002	2.31925184976664	5.72256703546561E-09
531	POM121C	NM_001099415	2.62426480831428	5.79912542024342E-09
532	CREB1	NM_134442	3.06278680460529	5.81713391823328E-09
533	C19orf66	NM_018381	0.402615591749055	5.81713427407772E-09
534	POLRMT	NM_005035	0.3588889334621	5.85494910027656E-09
535	ZNF17	NM_006959	0.412833696273507	5.98721332370222E-09
536	SNORA70B	NR_003707	0.21232619181079	6.22421133371837E-09
537	CCNT2	NM_058241	3.25907597387778	6.2856912213845E-09
538	FLYWCH2	NM_001142500	4.09499853735909	6.30801181399796E-09
539	ZNF23	NM_145911	0.386605713631333	6.34334264530184E-09
540	GIT1	NM_001085454	6.88071998354242	6.40746356878741E-09
541	CHAC2	NM_001008708	8.10863987300725	6.4514824719595E-09
542	C9orf116	NM_001048265	0.198904198917287	6.4801929936832E-09
543	CCDC59	NM_014167	4.30082942402778	6.56220337213289E-09
544	MTOR	NM_004958	0.383398105275962	6.72973588052374E-09
545	SNRNP27	NM_006857	12.5677896495248	7.36624785460574E-09
546	TANGO6	NM_024562	0.372263006407951	7.37550023890763E-09
547	BANF1	NM_001143985	2.59937428518034	7.85431739081695E-09
548	SNORA70E	NR_033347	0.0906842600418231	8.07242603804553E-09
549	ZDHHC8	NM_001185024	0.217918257101975	8.08477527812901E-09
550	KLF16	NM_031918	0.250639272397935	8.08477527812901E-09
551	STUB1	NM_005861	3.80222233803289	8.19568487470164E-09
552	UBE3B	NM_183415	2.61558873626555	8.35212458125107E-09
553	TMEM232	NM_001039763	0.322508927088509	8.39501513919603E-09
554	POC1B	NM_172240	0.337927588546989	8.39501513919603E-09
555	KDELC2	NM_153705	5.40542194678733	8.49357136363246E-09
556	RBM15B	NM_013286	0.287522761077201	8.55480757214072E-09
557	ZBTB43	NM_001135776	5.31547930122482	8.7381828304832E-09
558	RPL18	NM_000979	0.356765673005753	8.81456298279518E-09
559	GOSR2	NM_004287	0.326607628499776	9.00609960902106E-09
560	ZDHHC11	NM_024786	0.246342627867976	9.05379668483514E-09
561	SNORA48	NR_002918	0.184284105655535	9.06616310628588E-09
562	CLDND1	NM_001040182	3.53148233811478	9.20809655128011E-09
563	ARSG	NM_014960	0.169587177445828	9.43802394425928E-09
564	GLRB	NM_000824	4.37907625821334	9.4618230744247E-09
565	SNHG15	NR_002952	0.150710322405572	9.57392037573582E-09
566	CSTF2T	NM_015235	0.359901763963971	9.67088548781968E-09
567	ZNF599	NM_001007248	4.97326479717004	9.87644352453057E-09
568	TAPT1	NM_153365	2.74253536415524	9.96778447935258E-09
569	HNRNPF	NM_001098206	0.274512937492414	1.02463437594391E-08
570	ELOVL4	NM_022726	5.14325652713646	1.03119075137147E-08
571	IGIP	NM_001007189	0.409077269935329	1.03390717162732E-08
572	ZNF233	NM_001207005	5.19832898475849	1.04112653141565E-08
573	FKBP11	NM_016594	0.148907287876786	1.07139589090541E-08
574	EPB41L1	NM_012156	2.91004165423724	1.08603831735168E-08
575	FBL	NM_001436	0.3945713581243	1.11561486214864E-08
576	BMPR2	NM_001204	2.62558853473003	1.15804726260076E-08
577	ATP2B1	NM_001682	4.83267593223681	1.18469808509665E-08
578	UBAP1	NM_001171201	4.85094243432123	1.22944380047456E-08
579	DNAJC11	NM_018198	2.58084294995744	1.23626113831828E-08
580	MYO15A	NM_016239	0.0924717352408691	1.25217774655791E-08
581	VPS35	NM_018206	4.13562040667838	1.25750629836166E-08
582	RPS2	NM_002952	0.210887711273948	1.26776264332547E-08
583	TMEM203	NM_053045	0.36199713581831	1.27761766932595E-08
584	DPY19L4	NM_181787	6.35496009902517	1.27761766932595E-08
585	FAM120AOS	NM_198841	33.7523174398205	1.2941918538888E-08
586	DUSP23	NM_017823	0.148735130949616	1.30568234618063E-08
587	MAOB	NM_000898	5.05027828218752	1.34578870215914E-08
588	NBPF24	NM_001101663	0.42982891848771	1.35007373757092E-08
589	DNAJB1	NM_006145	4.77094501622172	1.35007373757092E-08
590	MRRF	NM_138777	0.457011536000579	1.35991746769851E-08
591	MOSPD2	NM_152581	3.39940705393519	1.35991746769851E-08
592	TFG	NM_001195478	9.44816199573788	1.36079125329838E-08
593	PTPMT1	NM_175732	0.316780882897055	1.3991690911492E-08
594	MAPK9	NM_002752	2.58374009583856	1.44032833543887E-08
595	CPSF2	NM_017437	2.77572992096219	1.44032833543887E-08
596	PCMT1	NM_005389	4.14117796214595	1.45935436365015E-08
597	TOX4	NM_014828	0.442315606522541	1.45935436365015E-08
598	C12orf4	NM_020374	10.5412027937501	1.45935436365015E-08
599	SLC25A4	NM_001151	2.4906879797981	1.4767840052546E-08
600	C3orf58	NM_173552	14.4129580737634	1.4772221705772E-08
601	RXRA	NM_002957	0.240715311594416	1.5101874280073E-08
602	SEH1L	NM_001013437	2.85524515652436	1.56453385494342E-08
603	STK11IP	NM_052902	0.344132764988137	1.5670611508215E-08
604	KCNA4	NM_002233	7.28370136265448	1.57298221149642E-08
605	ZADH2	NM_175907	0.235299599140602	1.62257959223816E-08
606	ERMP1	NM_024896	2.64837163900357	1.63952381107969E-08
607	IPPK	NM_022755	0.321308942884153	1.66400696702685E-08
608	CLCN6	NM_001286	0.388483868135604	1.68359527696859E-08
609	TMEM208	NM_014187	0.294886808825972	1.71558616399141E-08
610	CPSF3L	NM_017871	0.383912723420962	1.71558616399141E-08
611	NRG1	NM_013956	7.51222132132006	1.72615054552442E-08
612	RAD21	NM_006265	2.54193543614983	1.74623020552708E-08
613	PDRG1	NM_030815	3.15986821352377	1.77025542478273E-08
614	PIGF	NM_002643	3.11575825459845	1.80505140385187E-08
615	HSPH1	NM_006644	4.99905287800449	1.81893252866729E-08
616	MTHFR	NM_005957	0.392826465559295	1.83043291310472E-08
617	SFPQ	NM_005066	0.466036180650737	1.83338711748011E-08
618	RBBP6	NM_006910	7.71085630076925	1.83338711748011E-08
619	RAF1	NM_002880	3.22132694586306	1.91460975009671E-08
620	SHPK	NM_013276	0.301501753117611	1.95706584290993E-08
621	C10orf32	NM_001136200	2.42997406972458	1.96983405775768E-08
622	DAZAP1	NM_018959	0.197962100354641	1.99073453625871E-08
623	KIF13A	NM_022113	3.18713936048092	2.00643199035481E-08
624	VDAC2	NM_001184823	3.78176962191538	2.05463486768609E-08
625	WDR17	NM_170710	0.417904406978961	2.05463486768609E-08
626	ATG12	NM_004707	2.91570129678259	2.06134234891823E-08
627	TRAF4	NM_004295	0.458823232884546	2.08344272121734E-08
628	FRAT1	NM_005479	0.376419540637402	2.08344272121734E-08
629	HIST2H2AC	NM_003517	0.333284168728667	2.09247826070134E-08
630	ATP1B3	NM_001679	0.257176318972408	2.09377734285332E-08
631	MC1R	NM_002386	0.111603882722169	2.09641708782202E-08
632	MINK1	NM_153827	0.302979423328469	2.11487055507458E-08
633	ZBTB24	NM_014797	4.99171275238499	2.16011171942208E-08
634	PLGRKT	NM_018465	3.48952539762152	2.16295011686948E-08
635	TSG101	NM_006292	2.49469824924147	2.16333061498537E-08
636	ZBTB9	NM_152735	0.374021915124532	2.22781911072115E-08
637	SSB	NM_003142	4.37542742976008	2.26187089346947E-08
638	ZFP1	NM_153688	0.321834519106957	2.26187089346947E-08
639	BECN1	NM_003766	2.46432838147836	2.28103146105798E-08
640	MBD4	NM_003925	3.01888285708809	2.31725185873376E-08
641	GNMT	NM_018960	0.163393216171403	2.34111418058121E-08
642	AARS2	NM_020745	0.297470593767491	2.34111418058121E-08
643	SNORA65	NR_002449	0.0535588194387692	2.44358040782624E-08
644	TSNAXIP1	NM_018430	0.172332983424265	2.46022598259183E-08
645	EIF4E	NM_001130678	2.87380122804613	2.48338798244266E-08
646	PRH1	NM_006250	0.315532393051056	2.48338798244266E-08
647	MST1	NM_020998	0.155208876522832	2.48338798244266E-08
648	C19orf26	NM_152769	0.0735113003682868	2.48423585344571E-08
649	MIIP	NM_021933	0.388731896555315	2.49021363185246E-08
650	SENP2	NM_021627	2.72426037410483	2.60135643219201E-08
651	TCTN2	NM_024809	0.362197172469283	2.60636381494134E-08
652	C11orf58	NM_014267	2.4533353324744	2.68031932113206E-08
653	CALM2	NM_001743	3.63602481377698	2.69323215715378E-08
654	HMGA1	NM_145901	3.65748263662487	2.73412064950042E-08
655	C5orf45	NM_016175	0.388595522245148	2.73435087359339E-08
656	ME2	NM_002396	7.94598997329234	2.76202096046784E-08
657	WWP1	NM_007013	6.23854463757059	2.76202096046784E-08
658	NECAP2	NM_001145277	2.82834360459576	2.77876670353799E-08
659	SMIM14	NM_174921	0.36227076031129	2.78049368524371E-08
660	NBPF3	NM_032264	3.12343514445026	2.81243814098354E-08
661	CORO1C	NM_014325	0.295572801409655	2.81332815329418E-08
662	TNFAIP1	NM_021137	0.347921385886914	2.82871916092496E-08
663	ADAM9	NM_003816	2.98857441437426	2.923794653399E-08
664	WDR54	NM_032118	0.400922065104763	2.94268845979107E-08
665	MAP7D2	NM_001168465	6.45052606389318	2.95285239813915E-08
666	SUPT7L	NM_014860	2.90031184112728	3.02563360574117E-08
667	MBD1	NM_001204136	0.452330850913057	3.0927719841151E-08
668	TPGS2	NM_015476	3.24709700856317	3.09330935400102E-08
669	GPR21	NM_005294	0.156856847819272	3.1429152668445E-08
670	IMPA1	NM_001144878	3.38377768295127	3.18505102040542E-08
671	NAA15	NM_057175	2.84032453633051	3.18505102040542E-08
672	PICK1	NM_001039583	0.323199777500596	3.19917813918659E-08
673	RTF1	NM_015138	2.52015933821549	3.3496176782094E-08
674	ARL13B	NM_001174150	3.8372300910401	3.63507265905487E-08
675	DENND1C	NM_024898	9.65891738688869	3.66342295914076E-08
676	ZNF528	NM_032423	4.12591935876405	3.72797503679785E-08
677	LARGE	NM_133642	0.215311365554494	3.73647939573642E-08
678	TRAPPC1	NM_021210	3.24465453983046	3.85169340779447E-08
679	C11orf63	NM_024806	4.54827097827479	3.90638550610963E-08
680	GTPBP4	NM_012341	2.99605186018871	3.91188976193916E-08
681	ACAT1	NM_000019	2.59453256237614	3.99185723096838E-08
682	FAM214A	NM_019600	0.379624864449866	4.02153471446677E-08
683	PPP1R10	NM_002714	2.85327817814376	4.10697528248324E-08
684	POLR3A	NM_007055	0.460285756882724	4.15133409077138E-08
685	NAP1L4	NM_005969	3.34117268877261	4.206763516095E-08
686	OSBP	NM_002556	2.57530591635497	4.24340117374552E-08
687	PFN1	NM_005022	0.394402624529139	4.28051767070064E-08
688	EIF1B	NM_005875	2.46861885765665	4.37225955506081E-08
689	GNG2	NM_053064	4.06832657426228	4.37259218491606E-08
690	TERF1	NM_017489	4.40034009427326	4.49943678712555E-08
691	RPL23A	NM_000984	0.445078960412082	4.52959269189802E-08
692	AZIN1	NM_148174	2.97478248395226	4.58251702279492E-08
693	FAM86C1	NM_018172	0.299587153541591	4.59394926584101E-08
694	SRSF7	NM_001031684	0.455561691822896	4.65526402268898E-08
695	RPP40	NM_006638	0.179237855078175	4.67333598012477E-08
696	TRIM44	NM_017583	0.422392232369473	4.80273837165591E-08
697	NDUFA5	NM_005000	3.57769558690357	4.8356430024331E-08
698	SLC35B1	NM_005827	0.455639022169291	4.94530277348312E-08
699	SLC39A7	NM_001077516	0.307872727232727	4.94868675764888E-08
700	MTCH1	NM_014341	7.02532370565766	4.94868675764888E-08
701	ASRGL1	NM_001083926	7.83450296882101	4.9951270286765E-08
702	NRAS	NM_002524	2.68304796462186	5.11216011758875E-08
703	PGAM5	NM_001170543	0.411150383682822	5.22726321481755E-08
704	C17orf59	NM_017622	0.404439998952878	5.22726321481755E-08
705	MDH1B	NM_001039845	0.290494214578322	5.35668921143628E-08
706	CSRNP1	NM_033027	0.175065935588367	5.36242225467559E-08
707	RMDN3	NM_018145	0.394315760152962	5.47025216351237E-08
708	CAPZA1	NM_006135	2.81222609989243	5.69170910353159E-08
709	NCKIPSD	NM_016453	0.333456133404174	6.07897804613148E-08
710	UBR7	NM_175748	3.73550088300227	6.1493630583747E-08
711	GID8	NM_017896	0.300708331551338	6.17662724150899E-08
712	MREG	NM_018000	0.202408990515408	6.19058110484803E-08
713	POGK	NM_017542	2.02688132918402	6.27813059370013E-08
714	TPD52	NM_001025252	2.96706548225487	6.41960843956947E-08
715	SLC29A2	NM_001532	0.27207341589244	6.41960843956947E-08
716	DNAJB2	NM_006736	3.40205253712157	6.41960843956947E-08
717	PPP1R13B	NM_015316	2.41485625828366	6.41960843956947E-08
718	HNRNPDL	NM_031372	2.3453417598986	6.41960843956947E-08
719	RPS4Y1	NM_001008	2958.13832878791	6.4481793344866E-08
720	ARPP19	NM_006628	2.39996442979392	6.55964234020645E-08
721	LRRC56	NM_198075	0.126289299668582	6.67646362755564E-08
722	SCAMP3	NM_005698	3.15791855705884	6.68004763904211E-08
723	ZSWIM6	NM_020928	0.297876936714628	6.84750803255344E-08
724	PPT2	NM_138717	0.361715867469242	6.92983473615588E-08
725	ZNF326	NM_182976	3.18945960138842	6.95098892098516E-08
726	NDUFB9	NM_005005	0.319527280467758	7.1416898813907E-08
727	ST6GALNAC6	NM_013443	3.76523941775741	7.32437028282143E-08
728	NCOA6	NM_014071	2.67184358044103	7.42438035734906E-08
729	JTB	NM_006694	0.424926524569326	7.49024269546739E-08
730	AIM2	NM_004833	5.61066096678156	7.51489641755632E-08
731	FEZ2	NM_001042548	3.19824687026506	7.57021793052214E-08
732	ARHGEF3	NM_001128615	3.1229880177983	7.74777797679411E-08
733	NDUFB10	NM_004548	0.32797703354722	7.77039827339853E-08
734	NR4A2	NM_006186	0.0420563542682212	7.88127819015134E-08
735	ATP5L2	NM_001165877	0.150901946669018	7.91269029452182E-08
736	DHX58	NM_024119	0.366278344023334	7.93425754000038E-08
737	AHSA1	NM_012111	2.58433681565733	7.9574805316709E-08
738	ATF6	NM_007348	2.7036796045955	8.19181124909774E-08
739	APC	NM_000038	3.0686865728934	8.4259993232542E-08
740	MAD2L1	NM_002358	4.51652186224138	8.48281655298339E-08
741	DDX50	NM_024045	2.80646796905961	8.48665271575275E-08
742	DAP	NM_004394	0.34337303268796	8.52111425094808E-08
743	RNF187	NM_001010858	2.37550439832706	8.62403988864979E-08
744	LMLN	NM_001136049	3.1207350738466	8.64351218487405E-08
745	KHNYN	NM_015299	0.415677123327767	8.7367534477934E-08
746	CREBRF	NM_153607	3.54550331401893	8.76389010624355E-08
747	CPLX2	NM_001008220	8.35817731349465	8.81234331516578E-08
748	MPST	NM_021126	0.20552327648899	8.81234331516578E-08
749	COG8	NM_032382	0.343215916284306	8.81234331516578E-08
750	DAXX	NM_001141970	2.4167347630878	8.94936920545029E-08
751	PPP5C	NM_006247	2.45877338921518	9.19257658429369E-08
752	BROX	NM_144695	3.72943751916272	9.19257658429369E-08
753	CFDP1	NM_006324	3.09541572632949	9.27422521881628E-08
754	ZNF862	NM_001099220	0.273626699895808	9.34772493275946E-08
755	MAGOH	NM_002370	4.0876172426488	9.38679731860286E-08
756	LMAN1	NM_005570	8.85061201773697	9.38679731860286E-08
757	AASDHPPT	NM_015423	4.02489173311369	9.52542865256042E-08
758	LIN52	NM_001024674	3.91194425866722	9.67919590818563E-08
759	TMEM126B	NM_018480	5.42286652677058	9.70322624508854E-08
760	TMEM167B	NM_020141	2.00135246585728	9.90299616194072E-08
761	PTK2	NM_005607	2.56040407301651	9.96696540311434E-08
762	MCM8	NM_032485	7.74198579470109	0.0000001006224535255
763	PPP1R3G	NM_001145115	0.0858991119428663	1.0402601418934E-07
764	FECH	NM_001012515	4.22787592096693	1.05958146786288E-07
765	ZNF384	NM_001135734	3.08455791136547	1.07075329306248E-07
766	ANKRD39	NM_016466	0.331721903952876	1.07758369415363E-07
767	UNC13A	NM_001080421	0.346878653053224	1.08849914431366E-07
768	SCOC	NM_001153446	4.32849019935648	1.09403190666403E-07
769	CCDC9	NM_015603	0.362822173664874	1.13941679389388E-07
770	MTA1	NM_004689	0.350257548568211	1.1398266141509E-07
771	TSPAN2	NM_005725	8.55517024659545	1.15741953624886E-07
772	MBOAT2	NM_138799	3.35500984631648	1.17374854044571E-07
773	NPRL2	NM_006545	0.269740646162732	1.17577635826414E-07
774	SEPW1	NM_003009	3.05954854296324	1.17927114898312E-07
775	CRIPT	NM_014171	3.84771731774103	1.17927114898312E-07
776	G6PC3	NM_138387	3.91170919934074	1.17927114898312E-07
777	NDST1	NM_001543	2.70736367106895	1.18029030631624E-07
778	SH3GL1	NM_003025	2.74313079709878	1.19971230567291E-07
779	MARK2	NM_001039469	0.387732621115948	1.20007088061923E-07
780	TTC1	NM_003314	4.11459114274149	1.20007088061923E-07
781	SUCO	NM_014283	3.79261842593351	1.20203966808238E-07
782	NDFIP1	NM_030571	2.62604742788779	1.23471858667358E-07
783	USP17L2	NM_201402	0.191555180639425	1.23624700152089E-07
784	ADCK5	NM_174922	0.236045799940408	1.23657634482405E-07
785	ARL16	NM_001040025	0.412056931000272	1.26108763173031E-07
786	TEN1	NM_001113324	0.399200954697961	1.26128403257875E-07
787	TRMT1L	NM_030934	2.43956531258939	1.26175023545814E-07
788	PLEKHF2	NM_024613	4.87190675379052	1.27661656134955E-07
789	CHMP3	NM_001193517	3.99635047118979	1.27729809206727E-07
790	ABCD4	NM_005050	0.308055576715569	1.28630879008055E-07
791	SNORA23	NR_002962	0.0438172392863058	1.28814231308606E-07
792	KCTD11	NM_001002914	0.256187381134434	1.30004654122256E-07
793	SLC39A6	NM_012319	2.76502015488074	1.30628502537616E-07
794	FAM188A	NM_024948	2.89816510791949	1.3311669130652E-07
795	USP46	NM_022832	2.65739034672257	1.36024806448867E-07
796	GCLC	NM_001498	5.38208015668491	1.3745293395076E-07
797	CCDC126	NM_138771	6.83506137436892	1.39199213553664E-07
798	ZNF680	NM_178558	0.377143480332914	1.46471463184938E-07
799	ACTR10	NM_018477	3.63726427313916	1.4871814122912E-07
800	BRD9	NM_023924	0.195335382340955	1.49408992348717E-07
801	CNOT10	NM_015442	4.91644501242613	1.50034563198746E-07
802	GHDC	NM_032484	0.287668675644607	1.50154504605541E-07
803	NCBP2	NM_007362	3.83182594814388	1.50830050798639E-07
804	SYN1	NM_006950	3.2859748177754	1.52691316897259E-07
805	DLG1	NM_004087	3.3040500010352	1.54390191809302E-07
806	CNPPD1	NM_015680	2.35687248496082	1.54390191809302E-07
807	AIFM1	NM_004208	2.70717573256932	1.55707423608207E-07
808	ZNF292	NM_015021	5.25816344367744	1.56470398811382E-07
809	LPCAT3	NM_005768	3.47377220123335	1.57314621189408E-07
810	FAM171B	NM_177454	3.12390239237363	1.57357811130654E-07
811	TESK1	NM_006285	0.317784783247668	1.60814131285305E-07
812	IMPA2	NM_014214	0.0593180011904868	1.62599336225545E-07
813	ATM	NM_000051	7.79172204929516	1.62642356990258E-07
814	STK16	NM_001008910	0.452215353312349	1.64172565906695E-07
815	CPLX1	NM_006651	0.22435456449318	1.64172565906695E-07
816	WASL	NM_003941	2.22204603591115	1.6519184068596E-07
817	MKS1	NM_017777	0.470180261683551	1.67305850748909E-07
818	VPS72	NM_005997	2.27367395080353	1.67662557477398E-07
819	RASSF5	NM_182663	3.17335841755478	1.70429237389133E-07
820	SLC25A45	NM_182556	0.265993083810946	1.70465467414445E-07
821	TMF1	NM_007114	6.67247031813482	1.7243383692319E-07
822	METTL8	NM_024770	5.57760909376596	1.72507944375904E-07
823	ARL15	NM_019087	3.5397394211508	1.76476305848461E-07
824	TOMM70A	NM_014820	2.58662225891524	1.76643683929593E-07
825	LRGUK	NM_144648	0.139928261854158	1.81863063496978E-07
826	YAE1D1	NM_020192	4.77656090282982	1.83737385347498E-07
827	PTPLAD1	NM_016395	2.29486637122249	1.85039122786327E-07
828	TMA7	NM_015933	2.6818763462917	1.8566901108488E-07
829	SLC35B2	NM_178148	3.29533215001452	1.86945420790569E-07
830	GLTP	NM_016433	3.69758656925876	1.88529408394917E-07
831	SPIN3	NM_001010862	0.315521647837299	1.91929115350449E-07
832	HARBI1	NM_173811	0.418197697140371	1.93208973099825E-07
833	MGRN1	NM_015246	3.02130921471632	1.99830809791183E-07
834	ARL6IP4	NM_018694	0.440440341367156	1.99830809791183E-07
835	FKBP3	NM_002013	4.50432439784545	2.02659144375628E-07
836	ARHGEF18	NM_001130955	0.35183843039484	2.03899521081658E-07
837	RNF111	NM_017610	2.18074403390585	2.04083540875467E-07
838	RND3	NM_005168	9.43814955292493	2.04575743536093E-07
839	TAX1BP1	NM_006024	3.74683335500087	2.04575743536093E-07
840	PLCD1	NM_001130964	0.282043634463464	2.04759120103154E-07
841	LONRF1	NM_152271	0.225667840933901	2.08925124508765E-07
842	SNORA75	NR_002921	0.08367540320169	2.0913914879647E-07
843	NISCH	NM_007184	0.222982736267953	2.10465864310777E-07
844	BEX4	NM_001127688	3.95293170370904	2.10999349511974E-07
845	C12orf68	NM_001013635	0.331531525028361	2.12596078207065E-07
846	CTR9	NM_014633	3.18689261364904	2.12596078207065E-07
847	CLN5	NM_006493	3.12450885140203	2.13796684434892E-07
848	TMEM8A	NM_021259	2.66776545324643	2.18107798883195E-07
849	TMSB10	NM_021103	0.194683470317533	2.21956303540533E-07
850	SMYD3	NM_001167740	2.87339661036103	2.23513370348898E-07
851	INA	NM_032727	2.74048268758193	2.25058355523547E-07
852	CDK11A	NM_024011	7.3651361581403	2.25309608423255E-07
853	DCK	NM_000788	4.25840121449582	2.26082740544073E-07
854	FAM3C	NM_001040020	0.233106790686086	2.26082740544073E-07
855	S100PBP	NM_022753	0.47518167472449	2.29320021139712E-07
856	CISH	NM_145071	0.131523320254603	2.30034120096154E-07
857	IFITM10	NM_001170820	10.1519046800495	2.30391224231932E-07
858	MAT2A	NM_005911	4.11026372162147	2.40376773266746E-07
859	PRRG2	NM_000951	0.338258648258405	2.41564348710336E-07
860	NSMF	NM_001130969	0.305074534489339	2.41564348710336E-07
861	SECISBP2	NM_024077	7.54970339413063	2.45594113726253E-07
862	RARRES2	NM_002889	0.0559205232871953	2.47119031281606E-07
863	SLC25A37	NM_016612	0.284007215645165	2.49178407591675E-07
864	ACTL10	NM_001024675	0.162196893832998	2.50321653484129E-07
865	SIPA1L3	NM_015073	0.322356943792459	2.51829269273837E-07
866	ZNF211	NM_006385	0.408202266959943	2.55117902664285E-07
867	RECQL	NM_032941	4.52696963733518	2.58009527888152E-07
868	ZMPSTE24	NM_005857	3.31678934009806	2.59587740886287E-07
869	CAP1	NM_001105530	4.55102807591004	2.5999701563451E-07
870	ENOPH1	NM_021204	3.19266007072107	2.5999701563451E-07
871	ZNF44	NM_001164276	0.285268741387558	2.64934398753527E-07
872	FASTKD2	NM_001136194	0.392398884167044	2.65861459114113E-07
873	FAM92A1	NM_145269	4.41544217050881	2.69505830700804E-07
874	RPS15A	NM_001030009	0.362859193338828	2.70395715917469E-07
875	PVRL2	NM_001042724	4.86072261064843	2.70554940826705E-07
876	HERC2	NM_004667	0.42194058124822	2.74570347401094E-07
877	ATP5C1	NM_001001973	2.26545914353594	2.75155090507209E-07
878	HDX	NM_144657	5.37900880143318	2.77527365456143E-07
879	LIME1	NM_017806	0.238976596982444	2.7879850340545E-07
880	ANKRD27	NM_032139	0.404147736668909	2.84934039643858E-07
881	EPCAM	NM_002354	2.64738558027084	2.89087521625712E-07
882	GPRASP2	NM_001004051	2.9606407360253	2.91174330928186E-07
883	ZNF212	NM_012256	2.53223666335848	2.91174330928186E-07
884	NBEA	NM_015678	0.470995120826183	2.91174330928186E-07
885	SPATA6	NM_019073	0.270416946774352	2.95465863997567E-07
886	GPR162	NM_019858	2.4942706946306	2.95465863997567E-07
887	DNAJC30	NM_032317	0.458696195366466	2.99332225976976E-07
888	PHF5A	NM_032758	0.400438507210356	3.03158423675848E-07
889	UTP23	NM_032334	3.73341309434137	3.03515750914256E-07
890	NSG2	NM_015980	11.3283105029784	3.05818745460839E-07
891	CHCHD4	NM_001098502	3.53370209109653	3.06286367247572E-07
892	DDB1	NM_001923	2.37259447333662	3.06286367247572E-07
893	CRBN	NM_016302	2.07614408175149	3.0717040543613E-07
894	ZFAND6	NM_001242911	0.407485686727055	3.19285725138899E-07
895	FRMD8	NM_031904	0.312361141825916	3.20592066130226E-07
896	UQCR11	NM_006830	0.438316567764589	3.27464658773053E-07
897	AGO2	NM_012154	0.341457831670826	3.32542055180844E-07
898	DNASE1	NM_005223	0.291130879483396	3.32730722696298E-07
899	ARFGAP1	NM_175609	0.386776795775669	3.35087756931857E-07
900	API5	NM_001142930	3.28429132387871	3.35323826775719E-07
901	CNDP2	NM_018235	2.21780551863251	3.48844625214912E-07
902	SPIN4	NM_001012968	0.391945427188096	3.61367496402174E-07
903	HSF2BP	NM_007031	0.166833743109015	3.84309079433279E-07
904	ZBTB1	NM_001123329	2.54785415123576	3.85566779227236E-07
905	MRAP2	NM_138409	5.26431875727041	3.85593279686156E-07
906	TIMM21	NM_014177	2.9760928275675	3.87998866804875E-07
907	THAP10	NM_020147	4.22371216757502	3.91576162201672E-07
908	TOP2B	NM_001068	4.35146541181082	3.96055214486985E-07
909	INTS8	NM_017864	0.348981201407863	4.02994420822958E-07
910	APEX2	NM_014481	3.57887334759286	4.04417566106138E-07
911	FAM65C	NM_080829	0.0547251578063673	4.14435328444176E-07
912	ACADVL	NM_000018	2.49728766231984	4.24440602530132E-07
913	PIK3C2A	NM_002645	11.7265501625886	4.34639472126476E-07
914	PIAS1	NM_016166	3.71516777779603	4.34639472126476E-07
915	ZMAT2	NM_144723	2.87984145715491	4.34639472126476E-07
916	RHOG	NM_001665	4.52360338982991	4.38540744880883E-07
917	TMEM165	NM_018475	3.03352663143897	4.40429664111762E-07
918	EGR1	NM_001964	0.129486013514114	4.41496983043667E-07
919	TMX4	NM_021156	2.22831043674685	4.42935974712499E-07
920	D2HGDH	NM_152783	0.171549277154084	4.43250005113732E-07
921	KRTAP12-1	NM_181686	0.109334178050323	4.53010529021271E-07
922	JUNB	NM_002229	0.0981811891795174	4.55348602365653E-07
923	OGFOD3	NM_024648	4.05368694379612	4.59921906618018E-07
924	ATAD3B	NM_031921	0.149943356274257	4.60061596254922E-07
925	UMPS	NM_000373	2.61994852407957	4.63412148938425E-07
926	AMN1	NM_001113402	3.32213661351728	4.63412148938425E-07
927	YPEL2	NM_001005404	0.262454617010919	4.63786516488964E-07
928	MFAP3	NM_005927	3.36781562897232	4.66186106115016E-07
929	FN1	NM_212482	14.1623470140536	4.72830164907121E-07
930	MYBBP1A	NM_001105538	0.405387114106883	4.77958700511849E-07
931	CREBL2	NM_001310	3.12497537825571	4.78754610666084E-07
932	POM121	NM_172020	3.82948589221815	4.78754610666084E-07
933	GDAP2	NM_017686	2.54548430448734	4.80966473378351E-07
934	SBF2	NM_030962	3.16653558673162	4.80966473378351E-07
935	METTL14	NM_020961	5.70388293890443	4.84909342368359E-07
936	NME5	NM_003551	7.24843614794758	4.88579502146888E-07
937	SWI5	NM_001040011	0.321064900816657	4.96785970155649E-07
938	MLLT11	NM_006818	4.43934466171072	5.02408237006666E-07
939	MARCH7	NM_022826	3.69022384189726	5.03882682903781E-07
940	TRIM26	NM_001242783	0.438790735446186	5.05996110780497E-07
941	ZNF280B	NM_080764	5.13572761266078	5.12734160488851E-07
942	GLO1	NM_006708	3.17753528704952	5.12791313044246E-07
943	NOL9	NM_024654	0.494257104471048	5.22859915498861E-07
944	SIRT1	NM_012238	2.65661656401011	5.25230038765025E-07
945	SHOC2	NM_007373	4.39613762207278	5.2583148038268E-07
946	TASP1	NM_017714	0.335203842613003	5.26521491624105E-07
947	AP2B1	NM_001030006	2.73158838723476	5.32472388879199E-07
948	KLHDC4	NM_017566	0.393465675863786	5.36469421770682E-07
949	TGS1	NM_024831	3.37006555493345	5.39389545868634E-07
950	PLEKHA3	NM_019091	4.9033103573527	5.41673568425546E-07
951	SDR39U1	NM_020195	3.13801253794614	5.63010239919138E-07
952	RNF25	NM_022453	0.402246938277492	5.65715938915791E-07
953	MARK1	NM_018650	2.88117402908792	5.68973899999127E-07
954	LACC1	NM_001128303	8.14137819122132	5.70692380591346E-07
955	DNAJC12	NM_021800	0.412628431923301	5.73681701182945E-07
956	NT5C2	NM_012229	0.280996729953516	5.79519662036226E-07
957	STOML1	NM_004809	3.0822589798925	0.0000005799255000107
958	HMGN5	NM_030763	8.80710687862748	5.85165165542116E-07
959	PIK3IP1	NM_052880	0.380117229011601	5.89908191786908E-07
960	UBR5	NM_015902	2.18480222483007	5.91787966404733E-07
961	MMAB	NM_052845	2.69690719945327	5.95772421266859E-07
962	SLC35A5	NM_017945	3.72045909096457	5.96373496292302E-07
963	KLHL21	NM_014851	0.249656800631358	5.98038857760696E-07
964	ZEB1	NM_001174093	2.6479785847476	6.00498877328762E-07
965	PRKAR1A	NM_212471	2.01625070625708	6.01927273507796E-07
966	AUP1	NM_181575	0.301297336771579	6.04119699178603E-07
967	TSPAN7	NM_004615	3.77090032016511	6.07337110181375E-07
968	MRPL17	NM_022061	3.48692811098086	6.22161686616987E-07
969	NOB1	NM_014062	0.429138225815324	6.23583826963802E-07
970	STT3B	NM_178862	2.90261288344075	6.2706860174348E-07
971	NHEJ1	NM_024782	4.55459128203828	6.31948041304646E-07
972	DDX51	NM_175066	0.402850039811809	6.36049869436027E-07
973	ATF7	NM_006856	0.378671397009577	6.46667059570839E-07
974	CBX5	NM_001127321	2.6650488779221	6.59887545372952E-07
975	RAPGEF4	NM_007023	3.88831314507446	6.71305128161806E-07
976	CENPC	NM_001812	5.40209501620928	6.74883893017286E-07
977	CBL	NM_005188	3.18600810337714	6.74883893017286E-07
978	CHCHD10	NM_213720	0.255545863645069	6.74883893017286E-07
979	LRRC23	NM_201650	0.11985679322055	6.87862550440253E-07
980	STAT5B	NM_012448	0.266672921684948	7.06943922816784E-07
981	ZNF274	NM_016324	0.378747054999265	7.0826668474467E-07
982	DDX31	NM_022779	0.449082279411608	7.13247308348499E-07
983	LMF2	NM_033200	0.41604470019964	7.15124975877322E-07
984	ZNF266	NM_006631	0.320984005024135	7.20410484486707E-07
985	MUTYH	NM_001048172	0.329046175326623	7.24141157381958E-07
986	MRPL23	NM_021134	0.355365251603152	7.40053274356976E-07
987	SESN1	NM_014454	2.96843081343148	7.48956702076293E-07
988	TM2D1	NM_032027	2.6810371934685	7.4896462861968E-07
989	CLASP1	NM_015282	0.39008492280443	7.61359791835789E-07
990	C16orf87	NM_001001436	3.07553927644284	7.61819555434386E-07
991	FOXD4L6	NM_001085476	0.146680550167142	7.65392159374708E-07
992	DAZAP2	NM_001136266	3.92904838204506	7.69441826357946E-07
993	XPO1	NM_003400	4.91289368568706	7.69441826357946E-07
994	JMJD4	NM_023007	0.404678367917768	7.69651082008585E-07
995	ABCD2	NM_005164	5.74765562251018	7.7075789046469E-07
996	CSRP2	NM_001321	6.5931682799004	7.80469102920329E-07
997	BRIX1	NM_018321	2.41208662657095	7.80469102920329E-07
998	PPCDC	NM_021823	0.415505628262362	7.80469102920329E-07
999	PAICS	NM_001079525	2.75893874916841	8.23001167441521E-07
1000	ENPP2	NM_006209	5.55308595395602	8.2303063272213E-07
1001	PNPLA7	NM_001098537	0.0576878049383811	8.38072882642139E-07
1002	SLC7A8	NM_012244	4.13022673795096	8.40918785047091E-07
1003	OSTM1	NM_014028	3.10477382313388	8.47360875593409E-07
1004	ZMYND11	NM_001202468	2.050441309068	8.53920039696261E-07
1005	EXOSC8	NM_181503	0.314924193512337	8.53920039696261E-07
1006	POLR2D	NM_004805	0.479819584010846	8.58401867268415E-07
1007	APH1A	NM_001077628	2.1228116071377	8.74296084574011E-07
1008	RPS4X	NM_001007	0.373362684356035	8.7960382080212E-07
1009	SNORA70F	NR_033309	0.176513974373382	8.8747272957113E-07
1010	NLK	NM_016231	2.08488235577335	8.89260467770704E-07
1011	KLHL18	NM_025010	2.71894671126388	8.92650555831316E-07
1012	PPP6R2	NM_001242898	0.348114469574013	9.05489859502625E-07
1013	CTNNA1	NM_001903	2.25404400088389	9.05489859502625E-07
1014	AGER	NM_001136	0.238594976400283	9.16396230462253E-07
1015	ARL14EP	NM_152316	2.52651285873181	9.1666042645791E-07
1016	SLC2A1	NM_006516	3.15697921487874	9.18743650811877E-07
1017	ARF4	NM_001660	2.89085155571932	9.21599334819028E-07
1018	STX3	NM_004177	4.03801572362071	9.44601757971783E-07
1019	PDE6D	NM_002601	3.43826543279278	9.52161466342132E-07
1020	LEPRE1	NM_001146289	0.475640656398172	9.55259603370312E-07
1021	CCNG1	NM_199246	3.94839572933585	9.55259603370312E-07
1022	AACS	NM_023928	0.443173946937885	9.74600492421818E-07
1023	ACAP1	NM_014716	3.0898228379064	9.99481666673569E-07
1024	NLE1	NM_018096	0.399527728515793	1.00060526585046E-06
1025	RP11-1055B8.7	NM_001080519	0.309054143565394	1.00355634174357E-06
1026	SLC16A14	NM_152527	5.27827857501384	1.00855193437679E-06
1027	ZYX	NM_003461	0.348209834012097	0.0000010131540103671
1028	GIGYF1	NM_022574	0.32601658772075	1.01541019997916E-06
1029	PTPLAD2	NM_001010915	4.66366645537643	1.01956115282791E-06
1030	THBS4	NM_003248	0.0886000787624485	1.02274302987349E-06
1031	RBM26	NM_022118	3.37798227121425	1.02274302987349E-06
1032	UBXN11	NM_183008	0.212873503375859	0.0000010445383925111
1033	HIST1H1E	NM_005321	2.97631961670782	1.11126724380758E-06
1034	ERCC1	NM_202001	0.293128472416752	1.11764092471934E-06
1035	MAP4K5	NM_198794	4.3357446292485	1.12713447135546E-06
1036	SRXN1	NM_080725	0.299193338835068	1.12964018865802E-06
1037	PCCA	NM_000282	0.480154242299967	0.0000011492335275995
1038	LPIN3	NM_022896	0.196710317715331	1.15992756901457E-06
1039	PTPRA	NM_080841	2.27846188176658	1.15992756901457E-06
1040	CDKN1C	NM_000076	0.187648053829715	1.16426150907435E-06
1041	CLK3	NM_001130028	0.416760676658468	1.17935064324647E-06
1042	CDR1	NM_004065	6.68557178558995	1.17935064324647E-06
1043	ATF4	NM_182810	0.345130873464911	1.17935064324647E-06
1044	FOXD4	NM_207305	0.188972130472058	1.20061764641877E-06
1045	FSTL3	NM_005860	0.289007804724244	1.20191946057992E-06
1046	HIST1H3D	NM_003530	0.243788059646944	1.23111230195697E-06
1047	AIFM3	NM_144704	0.124400516165689	1.24355796647415E-06
1048	PM20D2	NM_001010853	3.9435294175694	1.24761725039252E-06
1049	MICU3	NM_181723	4.70067551307577	1.25795563369814E-06
1050	SEPT11	NM_018243	3.14707637334773	1.27685923891293E-06
1051	PLEKHH3	NM_024927	0.261764521991962	1.29810302631332E-06
1052	KXD1	NM_024069	0.444019949050421	1.29883229951549E-06
1053	MRPL14	NM_032111	0.348903850562732	1.30482759993767E-06
1054	AGAP5	NM_001144000	0.228309765436844	1.30547418121344E-06
1055	CASP9	NM_001229	0.292690828281038	1.30547418121344E-06
1056	DLST	NM_001933	0.457053505824125	1.31543220778588E-06
1057	LYRM7	NM_181705	0.447501170468203	1.33788177338831E-06
1058	BRD3	NM_007371	2.10623018945742	1.34968069144305E-06
1059	VPS4B	NM_004869	3.48743767194724	1.35069900393581E-06
1060	RTN4	NM_020532	2.1331672419675	1.36311764324558E-06
1061	EARS2	NM_001083614	0.411036451954017	1.36414311978426E-06
1062	FDX1L	NM_001031734	0.299780147076817	1.37007299202469E-06
1063	ABI2	NM_005759	0.448838687103204	1.39250097607279E-06
1064	CUTA	NM_001014433	0.392161099042985	1.40288097952765E-06
1065	GARS	NM_002047	0.32117268038912	1.40288097952765E-06
1066	MRPS21	NM_031901	9.6699756324208	1.40288097952765E-06
1067	OXCT2	NM_022120	0.160163406833761	1.41221938796556E-06
1068	IGSF3	NM_001542	0.200412464981944	1.42248013750721E-06
1069	B3GALT2	NM_003783	17.7712684267275	1.44366485746432E-06
1070	REV3L	NM_002912	2.51835503883688	0.0000014492855463844
1071	GPR148	NM_207364	0.284129087121176	1.46947599634522E-06
1072	LAMP2	NM_001122606	6.16444440161431	1.48052053729017E-06
1073	TRAF5	NM_001033910	54.7752339365108	1.48163034403601E-06
1074	BTAF1	NM_003972	0.385183083425268	1.52844089824504E-06
1075	TPRKB	NM_016058	3.13055436300797	0.0000015345234605455
1076	SEMA4A	NM_001193300	0.209085880054289	1.54768105181252E-06
1077	C17orf107	NM_001145536	0.117004077224185	1.54868531782747E-06
1078	TRAPPC2L	NM_016209	0.382272547735332	1.56138314381768E-06
1079	ZNF485	NM_145312	0.203118783013371	1.60060207658493E-06
1080	MBIP	NM_016586	3.93075443606046	0.0000016102842536082
1081	RFC3	NM_002915	4.37182345255032	1.61794964397323E-06
1082	PIGU	NM_080476	2.40360584409261	1.63711722352461E-06
1083	NSMAF	NM_001144772	2.14777208938566	1.67595433972545E-06
1084	SNORA5B	NR_002990	0.200179688956145	1.68153217506636E-06
1085	CCDC159	NM_001080503	0.287259636500692	1.73816799475695E-06
1086	EIF3K	NM_013234	0.484596611907237	1.78024081397323E-06
1087	SEC16B	NM_033127	0.0627046590657414	1.84127377859515E-06
1088	QSER1	NM_001076786	2.73121324777684	1.86601004512966E-06
1089	TPCN2	NM_139075	0.353753597493363	1.89975325968898E-06
1090	NOMO3	NM_001004067	4.34266444612383	0.0000019308881595726
1091	SGSM3	NM_015705	0.290892018032162	1.93834984381919E-06
1092	WARS	NM_173701	0.497075334631426	1.95466862716913E-06
1093	LRRCC1	NM_033402	5.94068231519695	1.95990773652402E-06
1094	ZKSCAN5	NM_145102	0.420101021368273	1.97572434503973E-06
1095	TSPAN31	NM_005981	2.8771889185465	1.99846707935854E-06
1096	ZNF35	NM_003420	0.435039699773394	2.01042278392979E-06
1097	SLC10A7	NM_001029998	0.435006141181342	2.02859225862895E-06
1098	PRSS16	NM_005865	0.306136264034481	2.02859225862895E-06
1099	CENPN	NM_001100624	3.80291606546501	0.0000020403610992796
1100	WDR45	NM_001029896	6.3205912578864	0.0000020707944172469
1101	PVRL3	NM_015480	3.83251952785749	2.07798565652515E-06
1102	ZNF688	NM_001024683	0.436776232485072	2.14213884515767E-06
1103	FAM199X	NM_207318	3.55934762211502	2.15670556242175E-06
1104	ST3GAL2	NM_006927	0.210871070288236	2.19853302243093E-06
1105	SYT7	NM_004200	0.160756944829979	0.0000022071767823727
1106	PINK1	NM_032409	2.43130026097368	2.22142163616529E-06
1107	SNRPF	NM_003095	2.03810388717663	2.25666575516942E-06
1108	CCNA2	NM_001237	0.191410869563743	2.32593932542992E-06
1109	ZUFSP	NM_145062	2.90778461563772	2.38419405105115E-06
1110	DUT	NM_001025248	2.81589507144858	2.41149831624182E-06
1111	GMPS	NM_003875	2.74085402748611	2.41149831624182E-06
1112	KDM5D	NM_001146705	1260.02336692504	2.41342675527124E-06
1113	CTTNBP2NL	NM_018704	2.28976532145557	2.41459098374241E-06
1114	CDC73	NM_024529	3.28307568279143	0.0000024153031708061
1115	SSX2IP	NM_001166293	3.17434125578348	2.41769270277872E-06
1116	ZNF345	NM_001242472	0.486983877985582	2.47552858682923E-06
1117	TMEM9B	NM_020644	2.03454906342875	2.47552858682923E-06
1118	KRTAP12-2	NM_181684	0.130780631081561	2.51879033420331E-06
1119	FDFT1	NM_004462	3.85764697891441	2.60039204856934E-06
1120	PTPDC1	NM_177995	0.195485434963093	2.62692899555006E-06
1121	MCM6	NM_005915	3.47547555137095	2.63341399255347E-06
1122	CMPK2	NM_207315	3.17365804453471	2.64293768273218E-06
1123	LYAR	NM_017816	2.43979386633433	0.0000026534076691595
1124	RIMS1	NM_014989	5.36503555977741	2.67814835054097E-06
1125	PFKFB4	NM_004567	0.382706779891614	2.68889257955645E-06
1126	UBAC1	NM_016172	3.24801234761753	2.68889257955645E-06
1127	CAPN15	NM_005632	0.311437467564247	2.72195161973727E-06
1128	PPFIA3	NM_003660	0.304080565054784	2.72384733524848E-06
1129	NOSIP	NM_015953	0.349420889535961	2.72384733524848E-06
1130	COPZ1	NM_016057	2.85096687086832	2.73141136990297E-06
1131	CAPNS1	NM_001749	2.5214968431317	2.77048805599837E-06
1132	RECQL5	NM_004259	0.449644008751395	2.77048805599837E-06
1133	POLR2M	NM_015532	2.13269619724951	2.77048805599837E-06
1134	GLTSCR2	NM_015710	0.32623158502701	2.77048805599837E-06
1135	NDRG3	NM_032013	3.46188278101807	2.77048805599837E-06
1136	CCDC149	NM_001130726	2.60247805936963	2.77149610174391E-06
1137	SPIRE2	NM_032451	0.304745543418578	2.78328731295031E-06
1138	HIST1H2BE	NM_003523	0.300573535328478	2.78407345433161E-06
1139	WDR45B	NM_019613	0.460420467092935	2.78426005917442E-06
1140	TRIM23	NM_001656	2.1701706469982	2.82038431433373E-06
1141	ZDHHC3	NM_016598	3.00706828604038	2.82038431433373E-06
1142	ANKS3	NM_133450	0.407230392381905	0.0000028379501317482
1143	IDH3B	NM_006899	2.4779740679048	0.0000028880119643945
1144	GGPS1	NM_001037277	5.24471205177039	2.90024274364054E-06
1145	MICU2	NM_152726	3.74285731513355	2.92003359107683E-06
1146	BPTF	NM_182641	0.326222463335293	2.99300949561681E-06
1147	MTFP1	NM_016498	0.330013218105248	3.04424333391457E-06
1148	SIGLEC11	NM_052884	0.1412078523005	3.07373032828951E-06
1149	ZNF570	NM_144694	2.81570979225838	3.07891442078201E-06
1150	IDI1	NM_004508	2.54662734386932	3.11432261352836E-06
1151	CTBP1	NM_001328	0.432426778845543	3.11717940857178E-06
1152	TFDP2	NM_001178139	3.16966754766667	3.13671140315165E-06
1153	COQ3	NM_017421	4.72289711218723	3.15583194264751E-06
1154	MED25	NM_030973	2.1363201610453	3.16126658801346E-06
1155	ZBTB46	NM_025224	0.325685137178826	3.22890130300491E-06
1156	ACOX1	NM_004035	2.21384446297307	3.23049896407999E-06
1157	UROD	NM_000374	2.63872783025194	0.0000032433261922727
1158	CDV3	NM_017548	0.487721456696127	3.24409086550114E-06
1159	ANKRD12	NM_015208	2.52739063082623	0.0000032470581848105
1160	PCYT1B	NM_004845	3.78493936115332	3.27204330793463E-06
1161	RBMS2	NM_002898	0.320644624412344	3.27909001319955E-06
1162	NAP1L1	NM_004537	4.08498818580149	3.30602377748858E-06
1163	NCR3LG1	NM_001202439	0.299925480842739	3.36951016589983E-06
1164	SESTD1	NM_178123	2.30956382798508	3.36951016589983E-06
1165	OR2A7	NM_001005328	0.158675371834364	3.39159764287388E-06
1166	CUL7	NM_001168370	0.451780980449579	3.43430553043317E-06
1167	IMMT	NM_006839	2.06893877042967	3.43430553043317E-06
1168	YBX3	NM_003651	0.0844153535642893	3.46869211465678E-06
1169	POMGNT1	NM_017739	0.451719838737819	3.49423727312601E-06
1170	DDX27	NM_017895	0.363984873021298	3.51661333596458E-06
1171	LRP5L	NM_001135772	0.131948518759007	3.51677694709553E-06
1172	ZZZ3	NM_015534	0.494931270723173	3.56221257336762E-06
1173	MRPS33	NM_053035	2.95567396098799	0.0000035823985949756
1174	ATG4D	NM_032885	3.8782786595186	3.59788899401407E-06
1175	STK33	NM_030906	2.24545494702416	3.60875739626325E-06
1176	TRMT2A	NM_022727	0.389380269002846	3.61166953985715E-06
1177	ARV1	NM_022786	3.47922232154993	0.000003652859619741
1178	RPL36	NM_033643	0.457628241771184	3.67442936148734E-06
1179	DNM1	NM_004408	0.345432507313116	3.67661721602929E-06
1180	SERF1A	NM_021967	3.417886638013	3.67661721602929E-06
1181	VMAC	NM_001017921	0.295555331189596	3.68441657319785E-06
1182	LRRC8B	NM_001134476	3.31531329296382	3.68441657319785E-06
1183	BUB3	NM_004725	0.473948039855055	3.71674553231014E-06
1184	RFX3	NM_134428	0.497039472568953	3.71674553231014E-06
1185	DHRS11	NM_024308	2.74757955409927	0.0000037350442783106
1186	CTC1	NM_025099	2.02796118143136	3.73931587966064E-06
1187	AK4	NM_203464	0.306343133251979	3.86245869338364E-06
1188	UBR3	NM_172070	2.38693917695634	3.89022687260984E-06
1189	BET1L	NM_001098787	2.32506173227805	3.93372332846521E-06
1190	ZNRD1	NM_170783	0.399246103523497	3.94176537094077E-06
1191	ABHD14A	NM_015407	3.37088007427912	3.94311636602105E-06
1192	PBX1	NM_002585	2.94044870296383	3.97113656330639E-06
1193	SPATS2	NM_023071	2.76883973515895	3.97113656330639E-06
1194	CTSS	NM_004079	5.80633704823925	3.98600687289423E-06
1195	MPG	NM_001015052	0.289883039982064	4.02627496928429E-06
1196	LRRC10B	NM_001145077	0.0992117318269959	4.11510249974361E-06
1197	AKNA	NM_030767	3.53838079952594	4.12489454835049E-06
1198	WDR70	NM_018034	0.496636573865025	4.18195694779302E-06
1199	SRRM3	NM_001110199	0.268734205217437	4.26115551900025E-06
1200	MPP2	NM_005374	2.83031948377964	4.26185748703506E-06
1201	TRRAP	NM_003496	0.418928722190394	4.29651764010862E-06
1202	TMEM70	NM_017866	3.01878909389636	4.30955260142389E-06
1203	C6orf226	NM_001008739	0.254612715740644	4.34985871204866E-06
1204	PRDM2	NM_012231	2.64717455115915	4.34985871204866E-06
1205	OPA1	NM_130837	2.46834978660313	4.37018238041544E-06
1206	USP24	NM_015306	0.496395396617382	4.40145392408789E-06
1207	BEX1	NM_018476	3.54899658320877	4.41580762157808E-06
1208	MXD4	NM_006454	0.385163599794552	4.47199029991463E-06
1209	CWC22	NM_020943	2.32349710305075	4.47469127759714E-06
1210	TBC1D3G	NM_001040282	0.254158041093195	4.50966155344819E-06
1211	CRTC1	NM_001098482	0.320338919627419	4.50966155344819E-06
1212	CADM2	NM_001167674	3.73272536874034	4.50966155344819E-06
1213	LTBP3	NM_001130144	0.38427925575904	4.51459315594056E-06
1214	NTPCR	NM_032324	2.37032190256213	4.51459315594056E-06
1215	EFNA5	NM_001962	4.52412749390328	4.52149146083571E-06
1216	ATP6V1H	NM_015941	2.51143983495289	4.60126651626759E-06
1217	MPP1	NM_002436	2.84721326773309	4.60418275367273E-06
1218	WDR5B	NM_019069	0.394272823112078	0.0000046048184446762
1219	KDELR2	NM_006854	0.337217481935782	4.60662491979783E-06
1220	UHMK1	NM_175866	2.93993564912043	4.67472189556161E-06
1221	HNRNPUL1	NM_007040	2.08947314454157	4.71692188882789E-06
1222	HOMER1	NM_004272	4.81606117206423	4.78752031287931E-06
1223	SAMD15	NM_001010860	0.371181757796005	4.79006424359061E-06
1224	FBXL8	NM_018378	0.286916687252489	4.79615257305579E-06
1225	GRWD1	NM_031485	0.450169045562431	4.79615257305579E-06
1226	CNOT4	NM_001190850	4.28021505211809	4.80859136238092E-06
1227	CAAP1	NM_024828	2.30362110241582	4.80963843048447E-06
1228	GNB5	NM_016194	2.53776285066865	4.86531030940582E-06
1229	IDNK	NM_001001551	2.9684979394072	4.86983148107683E-06
1230	RAB40B	NM_006822	0.386987087907396	4.87551274669528E-06
1231	EIF1AY	NM_004681	284.552036131361	4.91912994826554E-06
1232	TSPO	NM_000714	0.208297858387064	0.0000050166717556477
1233	HELB	NM_033647	0.195748096491969	5.03701491252902E-06
1234	PTBP2	NM_021190	0.354110295201557	5.17550846669205E-06
1235	GABARAP	NM_007278	3.00004189263684	0.0000051931858869245
1236	CSTF1	NM_001033521	2.86823442379572	5.33757430332024E-06
1237	MSMO1	NM_006745	2.92142109251254	5.33757430332024E-06
1238	STK17A	NM_004760	3.20841647064435	5.37910332229468E-06
1239	ATP11A	NM_032189	0.219875408638066	5.37910332229468E-06
1240	ERN1	NM_001433	0.405840725113902	5.38656960944398E-06
1241	PSME2	NM_002818	0.324711969527174	5.38656960944398E-06
1242	PLEKHM1	NM_014798	0.405035625768183	5.47562415089081E-06
1243	MYADM	NM_001020820	4.99523285688262	0.0000055211475344032
1244	ZNF446	NM_017908	0.142532669887541	5.52743882004232E-06
1245	WIPI1	NM_017983	0.224296177401613	5.60016292243642E-06
1246	MYH15	NM_014981	42.4242688602125	5.62013246976217E-06
1247	EPG5	NM_020964	2.12188232614956	5.62013246976217E-06
1248	PPP3CB	NM_001142353	4.18478973326203	5.63576130075687E-06
1249	SLC12A6	NM_133647	0.371546713794934	0.000005687219765324
1250	ZNF143	NM_003442	2.96620290126226	5.75727906219297E-06
1251	EMC9	NM_016049	0.402205944656054	5.77269859139294E-06
1252	OR4F3	NM_001005224	0.0801490700439979	5.86677541357414E-06
1253	IREB2	NM_004136	2.64221411482189	6.02957937502013E-06
1254	UBE2E3	NM_182678	4.43270284662051	6.06324473601895E-06
1255	FBXW9	NM_032301	0.404073515990914	6.16119248905999E-06
1256	SFR1	NM_001002759	0.265701510907337	6.25996387679138E-06
1257	DNAJA2	NM_005880	2.06003272590439	6.27498314798632E-06
1258	CAMSAP2	NM_203459	3.52440728215131	6.27719835597722E-06
1259	SMIM1	NM_001163724	0.16185339166901	6.31160086704311E-06
1260	PDPK1	NM_002613	2.16441531276676	6.42859392217483E-06
1261	SNORA70C	NR_003708	0.0954208468775532	6.43732244497695E-06
1262	SUMO1	NM_001005781	3.91127983764382	6.65571716227845E-06
1263	PPP1R9B	NM_032595	2.11677566915848	6.67321138961985E-06
1264	PHLPP2	NM_015020	3.2381870107739	6.70384692710948E-06
1265	UQCC1	NM_018244	2.12888137590677	0.0000067215159445395
1266	PDHX	NM_003477	2.15241084958632	6.72801441990267E-06
1267	SULT1A4	NM_001017390	0.280361626728779	6.75630041477055E-06
1268	SRPRB	NM_021203	0.287168843487206	6.85888740493019E-06
1269	CHRNE	NM_000080	0.0791003575142352	0.0000068908726849764
1270	RNF121	NM_018320	0.435496409672684	6.91862410586219E-06
1271	TBCEL	NM_152715	2.30022597108442	6.95711455639427E-06
1272	SIX4	NM_017420	3.6746391829745	7.02155789315524E-06
1273	HN1L	NM_144570	0.41957196372426	7.18391843762721E-06
1274	C18orf32	NM_001199346	2.21425287886771	7.21859275384843E-06
1275	KIF3B	NM_004798	2.40515590378474	7.25554959513925E-06
1276	ITFG1	NM_030790	2.56687041678548	7.27814053519349E-06
1277	NDFIP2	NM_019080	2.96403241894891	0.000007310606223514
1278	BLOC1S2	NM_173809	2.52429416723803	7.42319616044593E-06
1279	TSNAX	NM_005999	3.63267034188174	7.44583903968604E-06
1280	C17orf75	NM_022344	2.00174173279631	7.47172969022551E-06
1281	DDX3Y	NM_004660	830.027526970474	7.51346306132839E-06
1282	TMEM194A	NM_001130963	5.42079961603964	7.54226157328146E-06
1283	OTUD7A	NM_130901	0.336635640059754	7.54633394988848E-06
1284	PRDX6	NM_004905	0.449148320353906	7.56531431396874E-06
1285	LSM6	NM_007080	0.391384477531604	7.61682684729458E-06
1286	ALDH1B1	NM_000692	0.289315222773351	7.65754990759997E-06
1287	ZBED5	NM_001143667	2.0472686840985	7.82399976294241E-06
1288	UBLCP1	NM_145049	15.7350044023478	7.82399976294241E-06
1289	RPRD1B	NM_021215	2.21070753244072	7.84938105359872E-06
1290	FAM127A	NM_001078171	0.264611736717122	7.98958684936401E-06
1291	APPL1	NM_012096	2.21343746726485	8.05024763702109E-06
1292	VWDE	NM_001135924	0.169776008768459	8.10441853801655E-06
1293	ZNF335	NM_022095	0.414821997968277	8.15114667549088E-06
1294	ALDH18A1	NM_002860	0.341964349350971	8.25336078267938E-06
1295	TSC22D4	NM_030935	0.371890717317068	8.25336078267938E-06
1296	SNX12	NM_013346	2.47941624216757	0.0000082648690311643
1297	SLC27A4	NM_005094	7.39730588380135	0.0000085560184552016
1298	NUP88	NM_002532	0.428053182688048	8.56021885995739E-06
1299	FAM58A	NM_152274	0.381464849458533	8.57932896859008E-06
1300	TTF1	NM_007344	18.7309254802376	8.60996317061964E-06
1301	SHC1	NM_001130040	0.391210306695205	8.61449340436108E-06
1302	EPT1	NM_033505	5.27936761943603	9.03865488721618E-06
1303	TAZ	NM_181311	0.359794780880368	9.03865488721618E-06
1304	ZNF227	NM_182490	2.26244346974216	9.03865488721618E-06
1305	NIPBL	NM_133433	2.02332456717128	9.05896691257138E-06
1306	ZNF513	NM_144631	0.303014967615071	9.11037846666501E-06
1307	HP1BP3	NM_016287	2.58151033334359	9.12107079077096E-06
1308	MYL12A	NM_006471	2.506671854445	9.16249825272739E-06
1309	CC2D2A	NM_001080522	0.393769540893621	9.17635526003537E-06
1310	PUS1	NM_025215	0.24062163355179	9.28032645951735E-06
1311	C14orf93	NM_001130708	0.437879374537648	9.32896012383165E-06
1312	HSP90B1	NM_003299	2.52692344417591	0.000009415943779319
1313	RNF126	NM_194460	9.0129609099258	9.53925347596426E-06
1314	ANKEF1	NM_198798	2.75447125046536	9.53925347596426E-06
1315	GLA	NM_000169	0.444669390587359	9.57056089265208E-06
1316	DBP	NM_001352	3.03764059654726	9.57056089265208E-06
1317	MZT1	NM_001071775	3.292589687483	9.65320233672298E-06
1318	UFL1	NM_015323	5.23187167313656	9.65523695464401E-06
1319	USP9Y	NM_004654	540.883803529794	9.73892313572495E-06
1320	SMAD7	NM_005904	0.357050716423477	9.78321655245603E-06
1321	COA3	NM_001040431	2.15463401867704	9.90507344161374E-06
1322	SBF1	NM_002972	0.436552339743535	0.0000101277712381348
1323	RPL21	NM_000982	0.354091380895023	0.0000101653649994624
1324	ZNF627	NM_145295	6.65607285532725	0.0000102254047820071
1325	ULK1	NM_003565	0.402981861328979	0.0000103464032414565
1326	SNX25	NM_031953	0.274618779462738	0.0000104132305183165
1327	DNM3	NM_015569	4.421230538585	0.0000104854887092158
1328	KDM6A	NM_021140	5.94962238511684	0.0000105929578486442
1329	TSC22D3	NM_198057	0.325182488542346	0.0000106231500415399
1330	PDCL	NM_005388	2.28770456760019	0.0000106800291771307
1331	FAR1	NM_032228	2.28926757411731	0.0000107200545653471
1332	DENND1B	NM_001195215	4.20650028020085	0.0000107237630193666
1333	RAB11FIP4	NM_032932	0.321455440150565	0.0000107237630193666
1334	BPGM	NM_001724	0.4152318041381	0.0000107429684870023
1335	TMEM219	NM_001083613	0.401061371506771	0.0000108337516951023
1336	TERF2IP	NM_018975	2.77747236480804	0.0000108337516951023
1337	ISOC2	NM_001136201	0.312205843174802	0.0000109074954575599
1338	SCLY	NM_016510	7.93360649749061	0.0000109074954575599
1339	MMP25	NM_022468	4.64672958303276	0.0000109751524051254
1340	ZMAT3	NM_022470	2.65916912643079	0.0000110210257786311
1341	ATXN2	NM_002973	2.20506597088861	0.0000110608807493133
1342	KLF3	NM_016531	2.89744202638902	0.0000110608807493133
1343	DDX6	NM_004397	0.493560718056255	0.000011159813483522
1344	LAPTM5	NM_006762	7.47483020457581	0.0000113406528822925
1345	RALA	NM_005402	12.7458514100422	0.0000113728925189701
1346	PDXDC1	NM_015027	6.20740011668332	0.0000113728925189701
1347	PAPSS1	NM_005443	2.37147583031138	0.0000113921723694841
1348	OAT	NM_000274	2.14298876851092	0.0000114139619653437
1349	OR1L4	NM_001005235	0.106265726473655	0.0000116043471298003
1350	TMTC1	NM_001193451	3.18112295638244	0.000011721085152145
1351	MAP9	NM_001039580	2.93017957073656	0.0000117387779528124
1352	STRAP	NM_007178	3.48203048461355	0.0000117660186237717
1353	SLC22A17	NM_020372	3.12190026510959	0.0000117660186237717
1354	TEAD1	NM_021961	2.92195011292326	0.0000117660186237717
1355	FBXO11	NM_001190274	2.64144745482306	0.0000117707625754812
1356	SMG1	NM_015092	0.465995217352599	0.0000118604543870017
1357	DISP2	NM_033510	3.51225378414016	0.000012105399063567
1358	SMC2	NM_006444	3.84041198155052	0.0000121589609932228
1359	PEX12	NM_000286	0.488312772094592	0.0000121855620517168
1360	VTA1	NM_016485	2.75991005320651	0.0000122230500970573
1361	C5orf54	NM_022090	4.62025364013547	0.000012258452939661
1362	ATN1	NM_001007026	0.446385406112626	0.0000124994043439391
1363	ST13	NM_003932	0.359931210742459	0.0000125288359727628
1364	TRMT13	NM_019083	3.07732375169405	0.0000126511932705233
1365	ZNF318	NM_014345	2.42212255381717	0.0000127910733395969
1366	NPLOC4	NM_017921	0.377860392086443	0.0000127941564181825
1367	TRAPPC9	NM_031466	0.464992160739574	0.0000128607237570476
1368	AGAP6	NM_001077665	0.303793790849162	0.0000129675939612
1369	XXYLT1	NM_152531	9.16494551940317	0.0000129972040033876
1370	GTF2H5	NM_207118	2.80337693179819	0.0000130657527386816
1371	C8orf47	NM_173549	6.15677949310328	0.0000132242962114017
1372	RNF10	NM_014868	2.0481284862519	0.000013240043260835
1373	SNORA27	NR_002575	0.0781481531145475	0.000013240043260835
1374	HNRNPLL	NM_138394	3.3851852508867	0.0000134031850371268
1375	EMC8	NM_006067	0.496628541352734	0.0000134916922327084
1376	RAB23	NM_016277	3.92573574005876	0.0000135032237318725
1377	ZNF706	NM_016096	2.48775343894774	0.000013518994678666
1378	CENPF	NM_016343	9.28456149985983	0.000013623175910524
1379	RBBP8	NM_002894	0.25379212734507	0.0000137253356133069
1380	MGAT3	NM_001098270	0.235102005915741	0.0000140816717640478
1381	HIF1A	NM_001530	2.50101194529048	0.0000141043373610617
1382	BOLA2B	NM_001039182	0.413177088968296	0.0000141200787140077
1383	CEL	NM_001807	0.0610254263994226	0.0000143034369341382
1384	ADNP2	NM_014913	2.53577631787213	0.0000143897791400312
1385	UNC13C	NM_001080534	11.9255460569285	0.0000144222476785475
1386	HNRNPH1	NM_005520	2.50044067184415	0.0000145831161464637
1387	MOK	NM_014226	0.433124607420357	0.0000145949185268378
1388	TPD52L1	NM_003287	9.88454872955626	0.0000146421480733504
1389	MLH1	NM_001167617	0.44593950413119	0.0000151829139034533
1390	LGALS8	NM_006499	0.378986860833043	0.0000152410767531079
1391	LMAN2	NM_006816	0.456531026937264	0.0000152410767531079
1392	IFIT1	NM_001548	2.94166961196754	0.0000152447177383814
1393	FAM168B	NM_001009993	0.463541035398857	0.0000153857468801806
1394	WDR96	NM_025145	0.363057912475959	0.0000154172073340623
1395	SCAMP1	NM_004866	2.2277951222339	0.0000154311196621567
1396	NR4A3	NM_006981	0.0858127760528968	0.0000154689835449405
1397	GGH	NM_003878	3.94767499891509	0.0000156526999050484
1398	ITGAE	NM_002208	3.67412826448148	0.0000156560831792761
1399	C5orf51	NM_175921	4.523606096275	0.0000156560831792761
1400	ATF1	NM_005171	3.0103740605071	0.0000157983711776909
1401	UHRF1BP1L	NM_015054	2.21215975396308	0.0000161595755914037
1402	SNORA69	NR_002584	0.120465392606292	0.0000162538571303416
1403	CD55	NM_001114752	4.96249925705654	0.0000163373933891862
1404	AGPAT1	NM_006411	2.10092992971517	0.0000163373933891862
1405	CLDN12	NM_012129	0.451521120957941	0.0000163373933891862
1406	CDKN1A	NM_078467	0.13719081298502	0.0000163373933891862
1407	SRSF12	NM_080743	3.16388293157933	0.0000163373933891862
1408	CLDN4	NM_001305	0.228266820079318	0.0000163908984439403
1409	SNF8	NM_007241	0.358852989436644	0.0000164501697412006
1410	CEP57L1	NM_173830	3.37006215070539	0.0000164781452723089
1411	YEATS4	NM_006530	2.92760632142911	0.0000164982965840052
1412	SMARCAD1	NM_001128430	75.1109413981426	0.0000164991921403073
1413	NT5DC3	NM_001031701	0.286438849917761	0.0000165684068925804
1414	FAM167A	NM_053279	0.254698495625457	0.0000166250015710177
1415	KRTAP12-3	NM_198697	0.121183392953924	0.0000168369039142795
1416	GBE1	NM_000158	2.56024697430239	0.0000168928617437871
1417	DIAPH1	NM_005219	0.304360932860403	0.0000170706883845634
1418	SCN3B	NM_018400	2.51513169770695	0.0000170875143881052
1419	PIGX	NM_001166304	3.16610074453972	0.0000171671451046126
1420	LASP1	NM_006148	2.49984345332655	0.0000171671451046126
1421	MAN2A2	NM_006122	0.318165829622176	0.0000172749764359015
1422	PISD	NM_014338	0.257270357568307	0.0000172921522129503
1423	CREG1	NM_003851	6.38638199208977	0.0000173224919913733
1424	MYO6	NM_004999	2.13851819082492	0.0000174708483708218
1425	NANOG	NM_024865	0.176376556289724	0.0000174773550161007
1426	ADAM22	NM_021723	3.98500234070582	0.0000177784110469009
1427	ARPC3	NM_005719	2.46423056737733	0.0000178732889976178
1428	ACADSB	NM_001609	2.2136327350048	0.0000180355649267997
1429	RNF103	NM_001198951	2.45140358320573	0.0000181787199271768
1430	TSPYL6	NM_001003937	0.151154152589775	0.0000181791226252606
1431	KLHDC9	NM_152366	2.68949693733679	0.0000182006226247358
1432	BRICD5	NM_182563	0.281341261925389	0.0000182451605522017
1433	TMEM41B	NM_015012	4.0148612286871	0.0000183072413541178
1434	ECT2	NM_018098	12.7846882822447	0.0000183648632227897
1435	NDUFAF7	NM_144736	0.466598108273915	0.0000184159218525444
1436	TWISTNB	NM_001002926	4.31412703880483	0.0000184355094677173
1437	UVSSA	NM_020894	0.273789819896524	0.0000185555147475481
1438	MYO1D	NM_015194	0.410437737530129	0.0000185917219442337
1439	ACER3	NM_018367	5.9564597964235	0.0000186332380186606
1440	CCNT1	NM_001240	2.15126042198155	0.0000187501577080548
1441	ADCY9	NM_001116	0.305487840944966	0.0000187524927872511
1442	EIF3B	NM_001037283	2.00957394850845	0.0000188670444145203
1443	CAPN10	NM_023083	0.376174988683415	0.0000190653236518823
1444	SKA3	NM_145061	0.0967657232351464	0.0000190653236518823
1445	STXBP4	NM_178509	4.96376968134369	0.0000194630760517615
1446	PDSS2	NM_020381	0.388499787818204	0.0000196162827190716
1447	C2ORF15	NM_144706	2.25508237808278	0.0000196232349130611
1448	ZC3H13	NM_015070	2.62901532125014	0.0000196394170057627
1449	TRAPPC4	NM_016146	2.28830362372579	0.0000197940471802027
1450	EXOSC1	NM_016046	0.36174455341639	0.0000203505418025107
1451	NIF3L1	NM_001136039	2.13976651200763	0.0000203915183550447
1452	FAM86A	NM_201400	0.378352978812016	0.0000204987920801813
1453	GTF2H2C	NM_001098728	3.13676642087441	0.0000205145591116837
1454	PRIMPOL	NM_152683	0.464344303334845	0.000021011967105795
1455	BTF3	NM_001037637	8.04952575086046	0.0000210343067882456
1456	TMEM130	NM_001134450	2.91604809781599	0.0000210851474107704
1457	MMADHC	NM_015702	2.06931782467895	0.0000213334305368136
1458	FZD6	NM_001164615	2.78674275319124	0.0000213602692823956
1459	CDK13	NM_003718	2.7445204088821	0.0000214448202183189
1460	ACSL6	NM_001009185	4.32901488403183	0.0000214709541915999
1461	C1GALT1C1	NM_001011551	0.429893399886731	0.0000216550293741691
1462	NOL10	NM_024894	2.65552531578781	0.0000216550293741691
1463	PGM2L1	NM_173582	3.4423778720726	0.0000217201762947849
1464	ZFP90	NM_133458	2.15528124924251	0.0000217920671090817
1465	C10orf62	NM_001009997	0.192223295994552	0.0000218373506524309
1466	NAE1	NM_003905	3.70297348813454	0.0000220027027249062
1467	WDR83OS	NM_016145	2.26675386195783	0.0000220973490102669
1468	PRKAB2	NM_005399	3.16849173142233	0.0000221541270233025
1469	METTL20	NM_001135863	0.359043434423455	0.0000222216199824058
1470	HUS1B	NM_148959	0.135966771932865	0.0000225243069167893
1471	ZNF256	NM_005773	0.472336128940077	0.0000225535901031404
1472	COX11	NM_004375	4.74287947142796	0.0000226452358736221
1473	ZNF431	NM_133473	0.476281628548748	0.0000226452358736221
1474	TAB3	NM_152787	0.463330523842568	0.0000226852734031727
1475	RPL35	NM_007209	0.470393080246015	0.0000227848545701363
1476	CXXC5	NM_016463	2.10749283606969	0.0000227862224204806
1477	CDK2AP1	NM_004642	0.310763926707846	0.0000230744861574944
1478	ZNF697	NM_001080470	0.18142839047381	0.0000234826279766876
1479	WDR61	NM_025234	0.44019952388196	0.0000234826279766876
1480	RAB2A	NM_002865	2.60167631557752	0.0000234951454127532
1481	RAPGEF6	NM_001164386	0.382935058566341	0.0000235076704103104
1482	TMEM17	NM_198276	2.79755335666994	0.0000236273660506416
1483	SNCB	NM_003085	5.28856475612117	0.0000236799354036845
1484	TMEM158	NM_015444	0.108190123809317	0.0000239922201433333
1485	EFCAB12	NM_207307	0.273372306659283	0.0000240007594844219
1486	SMIM11	NM_058182	0.370900966144191	0.0000240904058850332
1487	GADD45A	NM_001924	3.78120944021757	0.0000241341793414247
1488	SNX27	NM_030918	2.23922794662014	0.0000243343566947793
1489	SPEG	NM_005876	0.391275972822584	0.0000243616558464236
1490	RAB43	NM_001204886	0.386233384733823	0.0000244674472923883
1491	FUCA1	NM_000147	3.91000657970453	0.0000246004383933612
1492	SPIRE1	NM_001128626	2.00335212064988	0.0000246004383933612
1493	CCDC6	NM_005436	2.54977660399591	0.0000246265928504332
1494	FAM53B	NM_014661	0.36664110599225	0.0000247334953400885
1495	EPHA7	NM_004440	7.26834663015852	0.0000248377259398431
1496	HMGCLL1	NM_019036	2.4872632273398	0.0000249302308503122
1497	LRRC1	NM_018214	2.68533691691748	0.0000252740805563775
1498	PHF21B	NM_001135862	0.258130458002325	0.0000254550811248538
1499	NR1D2	NM_005126	3.246229865839	0.0000254550811248538
1500	CCDC57	NM_198082	0.34026588578084	0.0000254550811248538
1501	USP38	NM_032557	2.0752107675213	0.0000257595538123118
1502	SRGAP2	NM_015326	10.2936460095819	0.000025769851419357
1503	WASF2	NM_006990	4.15961831703957	0.0000257875989418183
1504	PEAK1	NM_024776	3.77680263542344	0.0000257930628865496
1505	PPP1R3D	NM_006242	0.461614760419872	0.0000260705511638072
1506	CXorf22	NM_152632	0.194672346347608	0.0000260935098476202
1507	RETSAT	NM_017750	2.34069645702798	0.0000265577349171651
1508	ADAM10	NM_001110	2.04661344919633	0.0000268105902203453
1509	CDK4	NM_000075	0.412382971986776	0.0000269707361326315
1510	FMR1	NM_002024	2.8613738975165	0.0000269863097827373
1511	DCLK2	NM_001040261	0.416043717002475	0.0000270442001764849
1512	GGNBP2	NM_024835	2.88469389144998	0.0000270606340046536
1513	ZFR2	NM_015174	0.322237333648716	0.0000271199664304804
1514	MOB4	NM_001204094	2.52749462313714	0.0000273091697619702
1515	C4orf29	NM_001039717	2.99546410457087	0.0000274042456921018
1516	TMEM183A	NM_138391	0.211533383897557	0.0000277215170352492
1517	CTNND2	NM_001332	0.205940818892655	0.0000278925533732149
1518	ATP8A1	NM_006095	2.90770954608584	0.0000280422151729821
1519	RTEL1	NM_032957	0.30945265531257	0.0000280422151729821
1520	CEP70	NM_024491	3.32787533761959	0.0000280846651038517
1521	TMEM258	NM_014206	0.484068427803493	0.0000281013531196507
1522	WTAP	NM_004906	2.27718323965767	0.0000281198771678014
1523	SNX11	NM_013323	0.47025580712572	0.0000281198771678014
1524	HIC2	NM_015094	0.284144080719957	0.0000281561299132303
1525	STX16	NM_001001433	0.496254031788416	0.0000283535728508624
1526	FBXO8	NM_012180	2.14708292205814	0.0000283535728508624
1527	PCNXL4	NM_022495	2.0921064135928	0.0000283981559748098
1528	RPS3	NM_001005	0.391026647847125	0.0000284656575542787
1529	CTSV	NM_001333	9.73404360678023	0.0000284900925233144
1530	DCUN1D5	NM_032299	2.6816904416448	0.0000285011082090225
1531	OCLM	NM_022375	0.308843870348142	0.0000285043503583162
1532	OARD1	NM_145063	5.44623683048846	0.0000285624454403714
1533	GABPB2	NM_144618	0.375661525614855	0.0000286479051453442
1534	MOB3C	NM_145279	0.437392649986435	0.0000286855037013344
1535	TRAPPC11	NM_021942	6.75934811773755	0.0000292594091354558
1536	UBE2B	NM_003337	2.68095661395532	0.0000297781223139736
1537	STX6	NM_005819	2.37689382177699	0.0000297837816541896
1538	CYS1	NM_001037160	0.105909188104279	0.0000299912419784116
1539	NAPB	NM_022080	2.47397582450692	0.0000301964887207457
1540	TFB2M	NM_022366	3.09782756348815	0.0000304835059410193
1541	TYRO3	NM_006293	0.18661066672723	0.0000306206345582459
1542	HDAC4	NM_006037	0.349364863551471	0.0000306827939366682
1543	MCTP2	NM_018349	3.81732132776639	0.000031290924512634
1544	JAM3	NM_032801	2.04354492211665	0.000031290924512634
1545	HIBADH	NM_152740	2.06309428538163	0.0000314768346768616
1546	ALDH2	NM_000690	0.186220036192509	0.0000315679126838155
1547	TMEM125	NM_144626	0.287995758461741	0.0000316566090559915
1548	RNASEH2A	NM_006397	2.52600804556384	0.0000318455464746023
1549	TNFRSF25	NM_003790	0.279288564211305	0.000031848408068631
1550	LRRC48	NM_031294	0.423654243817829	0.000031848408068631
1551	C1QL1	NM_006688	20.8451941350009	0.000032410519266736
1552	ZNF32	NM_006973	3.41445071654082	0.0000325057273514088
1553	MSH3	NM_002439	3.76354361319466	0.00003265830929473
1554	UTP15	NM_032175	2.48689595794016	0.0000326839753326074
1555	HNRNPM	NM_005968	2.36673704278753	0.0000328117609409605
1556	GLCE	NM_015554	4.43265536656667	0.0000332529537459388
1557	POLM	NM_013284	0.369189249655378	0.0000333394510781449
1558	SPG20	NM_015087	2.82596921145851	0.0000334002251198709
1559	SF3A1	NM_005877	2.40323144325764	0.0000335378782382782
1560	FOXK2	NM_004514	2.44392194065271	0.0000336211897086007
1561	GORASP2	NM_001201428	3.7224959972685	0.0000338182440188842
1562	ARF3	NM_001659	2.62012856429579	0.0000340634196388705
1563	NAT9	NM_015654	0.368882836446316	0.0000341269179227992
1564	FBF1	NM_001080542	0.271560745943923	0.0000345399420323249
1565	THAP9	NM_024672	0.483996682250704	0.000034708500063365
1566	CAB39	NM_016289	0.487360599960343	0.0000348196139740221
1567	SLC9A3R1	NM_004252	4.23928108407073	0.0000349523657661578
1568	TRIM45	NM_025188	0.262943704574216	0.0000352022150545356
1569	ACSF3	NM_001127214	0.487869268241751	0.0000352939803968447
1570	MAP7D3	NM_024597	0.310825553772801	0.0000356721138392036
1571	CYB561	NM_001017916	0.222585065902287	0.0000356898367605229
1572	TMEM120B	NM_001080825	0.319875672790126	0.0000356898367605229
1573	CRIP1	NM_001311	0.174748724507769	0.0000360601323998608
1574	STRA13	NM_144998	3.39601800348461	0.0000361057886742348
1575	C17orf89	NM_001086521	0.353178594506321	0.0000362607773749535
1576	PFDN5	NM_002624	0.475079365672622	0.0000363058670998658
1577	RPS23	NM_001025	0.443316239693346	0.0000366995276811571
1578	ASPHD2	NM_020437	3.15301332631723	0.0000368878514971249
1579	U2AF1L4	NM_144987	4.19394420898376	0.0000371499355143147
1580	FKBP7	NM_181342	3.9222226070026	0.0000371786691972087
1581	ERCC2	NM_000400	0.480613169034911	0.0000373105518027434
1582	ANP32B	NM_006401	2.65279209647528	0.0000373105518027434
1583	NEDD4L	NM_001144967	0.382958358338784	0.0000373543238774936
1584	ZSCAN31	NM_001135216	0.392303013253701	0.0000375070287868909
1585	C17orf67	NM_001085430	0.339018593571291	0.0000376801254767354
1586	LAPTM4A	NM_014713	2.61327734075112	0.0000380055126586635
1587	COPRS	NM_018405	0.412640181496476	0.0000380055126586635
1588	HEBP1	NM_015987	0.449580200499976	0.0000380412892095419
1589	ASF1A	NM_014034	2.02695831874929	0.0000381983521967571
1590	PAPD4	NM_173797	2.92818618593462	0.0000381999603090942
1591	RPS19	NM_001022	0.342126018960439	0.0000382470350470378
1592	EPC1	NM_025209	2.34746079485865	0.0000383142213566046
1593	SLC4A8	NM_001039960	2.13749379399596	0.0000383276212578649
1594	APBA3	NM_004886	0.434320517903837	0.0000383931574109042
1595	TMEM87B	NM_032824	2.32211485372821	0.0000388756992918684
1596	LSM7	NM_016199	0.477433615620018	0.0000389120194117186
1597	SMIM10	NM_001163438	7.29273927404027	0.0000389912962983177
1598	AES	NM_198969	2.46643665265981	0.0000389912962983177
1599	ELOVL7	NM_001104558	4.47128796842879	0.0000390778476013888
1600	STARD8	NM_001142503	0.211278496190857	0.0000390778476013888
1601	UTP6	NM_018428	0.475597579863774	0.0000390778476013888
1602	USP34	NM_014709	2.09665238422741	0.0000391957097395537
1603	DEGS1	NM_003676	2.01802553645597	0.0000392980920469161
1604	SNORA2B	NR_002951	0.131017891719451	0.0000395229240151933
1605	REPIN1	NM_001099695	2.5100921780116	0.0000396162749742684
1606	HINT3	NM_138571	3.20131576354746	0.000039818057165081
1607	C5orf49	NM_001089584	0.3005251900135	0.0000400412270460094
1608	RABL3	NM_173825	2.73822221113393	0.0000400412270460094
1609	MED13	NM_005121	2.15603404231168	0.000040123627289323
1610	SMARCA1	NM_003069	2.2080360879	0.0000402960324686294
1611	C16orf93	NM_001014979	0.302587864398564	0.0000405920165259597
1612	LAMA4	NM_001105206	9.07552883806233	0.0000408280527908012
1613	DOCK3	NM_004947	2.30427677043216	0.0000412653232746632
1614	FIG4	NM_014845	2.22760363364473	0.0000412653232746632
1615	WDR47	NM_001142550	2.45005325272479	0.000041334595410641
1616	MAP3K7	NM_145331	2.58457780946012	0.0000417948200148782
1617	RPL35A	NM_000996	4.49439754311197	0.0000419940590282401
1618	KLHL23	NM_144711	2.25760278797681	0.0000421932667928057
1619	LGI1	NM_005097	21.885156542569	0.0000423582469037957
1620	C12orf5	NM_020375	4.22144612640514	0.0000424757394653649
1621	IER5L	NM_203434	0.163925507928996	0.0000425088370419912
1622	LRRC40	NM_017768	2.90769453971398	0.0000425766970512721
1623	ZNF264	NM_003417	0.477627349691817	0.0000427959295787396
1624	KIAA1109	NM_015312	0.140330882110484	0.0000430948756164352
1625	SYDE1	NM_033025	0.164753624039016	0.000043249527248759
1626	ACN9	NM_020186	2.93799504006671	0.0000434795604151114
1627	OPTN	NM_021980	3.15120305849212	0.0000437263918703017
1628	ITGB6	NM_000888	9.94700323657324	0.000044094675105314
1629	PYCR1	NM_006907	0.143974871503691	0.0000442261890582151
1630	HEATR3	NM_182922	3.11265154048017	0.0000442591793146486
1631	PCM1	NM_006197	2.55042084599702	0.00004434530226978
1632	ARHGAP5	NM_001030055	2.80022327824793	0.0000443572577200908
1633	UPK3BL	NM_001114403	0.40379794671618	0.000044359983628605
1634	RPL30	NM_000989	0.450922283338701	0.0000443908360008371
1635	RFWD3	NM_018124	2.2128159204677	0.0000452778938488015
1636	DGKD	NM_152879	0.3570058944196	0.0000456194285370693
1637	INO80	NM_017553	0.46958016948477	0.0000458099383736852
1638	FANCG	NM_004629	0.401471778084299	0.0000459417473061919
1639	COMMD8	NM_017845	3.81819663919398	0.0000463219266645676
1640	TNRC6A	NM_014494	0.373248214221161	0.0000464932774908457
1641	MED29	NM_017592	0.465759795840792	0.0000466064316693767
1642	SUPT20H	NM_001014286	0.382655742853869	0.0000471343036274965
1643	ZFY	NM_003411	340.568566769909	0.0000471343036274965
1644	H2AFZ	NM_002106	2.19600851381322	0.0000471635214511124
1645	TRAFD1	NM_006700	2.31411334529046	0.0000471635214511124
1646	TRIM8	NM_030912	0.409656215004287	0.0000473789884325247
1647	TMOD2	NM_014548	2.32742314064453	0.0000475767330722648
1648	DERL2	NM_016041	3.60083114586325	0.000047722446483182
1649	UBE2T	NM_014176	3.1074719670445	0.0000481030200730906
1650	ANO1	NM_018043	9.57025352230556	0.0000485642327688789
1651	SBNO1	NM_001167856	0.482645833043446	0.0000490254066613187
1652	MGEA5	NM_012215	2.42011624332477	0.0000490254066613187
1653	ATG4C	NM_032852	3.00908684063613	0.0000493707973547816
1654	HS3ST1	NM_005114	0.101076057427367	0.0000496798901834716
1655	OR52E6	NM_001005167	0.0887787277662106	0.000050466366205915
1656	APLP1	NM_001024807	2.58585472792937	0.0000506466949998296
1657	AP3B1	NM_003664	2.39615068682716	0.0000506511705766135
1658	SLC16A9	NM_194298	2.75657168758143	0.0000516527648144681
1659	DPYD	NM_000110	2.10043917785571	0.0000521974736906975
1660	LYSMD1	NM_212551	0.400796810354626	0.0000525564681726191
1661	CBFA2T2	NM_001032999	2.35325446607047	0.0000529930314296836
1662	VMP1	NM_030938	2.02190678719394	0.0000532638489069795
1663	C9orf163	NM_152571	0.230236298659897	0.0000534240562944297
1664	SPATA6L	NM_001039395	0.407735261275727	0.0000534466176751244
1665	MIER2	NM_017550	0.455784728908846	0.0000536280452990647
1666	RASL11A	NM_206827	0.137769302891483	0.0000537926811656494
1667	PER1	NM_002616	0.305282174679988	0.0000538327869179578
1668	MOB1A	NM_018221	2.13928069538988	0.0000540542560167649
1669	GKAP1	NM_025211	3.49619449413388	0.0000543834151216484
1670	SCRN2	NM_138355	2.42518276816876	0.0000546131478491013
1671	TTC30B	NM_152517	0.432970593724338	0.0000548925712848186
1672	USP31	NM_020718	0.480181119813994	0.0000554215244095164
1673	METTL2B	NM_018396	0.476549846496403	0.0000554307574682353
1674	SLK	NM_014720	2.88867661416907	0.000055471377474088
1675	OSBPL5	NM_020896	0.323681567669889	0.0000557103233242924
1676	ZC3HAV1	NM_020119	2.63414396067067	0.0000559614105600873
1677	NUCKS1	NM_022731	2.56433044398222	0.0000563994009439164
1678	ANP32E	NM_030920	2.23906646221128	0.0000568554465989102
1679	FAM96A	NM_032231	2.79418218712021	0.0000568554465989102
1680	NT5C3A	NM_001002010	2.61700598146564	0.0000568652125152262
1681	C1RL	NM_016546	0.257814764353656	0.0000569671215430836
1682	FAM81A	NM_152450	3.73613679625802	0.0000570181824802251
1683	SSC5D	NM_001144950	7.90101382442962	0.0000570916979900722
1684	SCNM1	NM_024041	0.43560998027886	0.0000570916979900722
1685	ATAD1	NM_032810	2.00321549542413	0.0000570916979900722
1686	CRNKL1	NM_016652	4.42425086165221	0.0000573946550759125
1687	RPL22	NM_000983	2.09744041963577	0.0000576423208932086
1688	TCEAL1	NM_001006639	3.02038054223645	0.0000576423208932086
1689	PDK3	NM_001142386	4.37644191319419	0.0000576511441814128
1690	RNF146	NM_001242851	3.13882631245056	0.0000578989829691757
1691	SRD5A3	NM_024592	3.20201745704538	0.000058501487478184
1692	HNRNPR	NM_001102398	2.15467150314487	0.0000585044309697992
1693	NPC2	NM_006432	3.43203649790992	0.0000585065888044194
1694	MIER1	NM_001077700	2.42659829795354	0.0000586345387997038
1695	RAB14	NM_016322	3.51772399922508	0.0000587195268564878
1696	TMEM132A	NM_017870	4.30572630752433	0.0000592437463735519
1697	CAB39L	NM_030925	3.92372393248792	0.0000592437463735519
1698	ATP5A1	NM_004046	2.38227816699077	0.0000592816936693641
1699	TRIM11	NM_145214	2.22828046162436	0.0000598344098375776
1700	CCNH	NM_001239	3.8878703115838	0.0000598781319287559
1701	FAM69A	NM_001006605	6.01668767247181	0.0000612391155886273
1702	AP4S1	NM_001128126	2.47220484085465	0.0000614393437537223
1703	WDR66	NM_144668	0.204975686549302	0.0000616296902465768
1704	MAB21L1	NM_005584	0.256392094984982	0.0000620341098449053
1705	FNBP1L	NM_001164473	2.8537928329124	0.0000621198902091721
1706	MLF2	NM_005439	2.03714843227392	0.0000631674840868448
1707	MTDH	NM_178812	0.23528007164446	0.0000637464534157749
1708	FAM175B	NM_032182	2.36428447402791	0.0000638925952366603
1709	MT1E	NM_175617	4.06886752215671	0.0000639314281524096
1710	HBS1L	NM_006620	3.11508879710939	0.0000646912690727686
1711	TMCO1	NM_019026	0.392009728977719	0.0000652933622628525
1712	RBM6	NM_005777	0.433565294495225	0.0000653865143038115
1713	TBC1D3F	NM_032258	0.251275598443329	0.0000654477136562642
1714	SPTBN2	NM_006946	0.224431207472982	0.0000654723892137002
1715	RFXAP	NM_000538	3.00653020119704	0.0000661571493337717
1716	AMH	NM_000479	0.154187431848684	0.0000666550800261724
1717	C11orf84	NM_138471	3.04939524665919	0.0000667909066577989
1718	PJA2	NM_014819	2.05587262031829	0.0000668942452097698
1719	PML	NM_033238	0.471046685266397	0.0000668942452097698
1720	SNORA77	NR_003019	0.206058102079334	0.0000668942452097698
1721	SUN2	NM_015374	0.482733093643079	0.0000675645356348432
1722	RPS3A	NM_001006	0.401644000713093	0.0000677884921508409
1723	SOD1	NM_000454	2.44869482998771	0.0000691021082057476
1724	ZNF747	NM_023931	0.42822415398052	0.0000691021082057476
1725	TNFSF12	NM_003809	2.49953385156225	0.0000691802105414998
1726	TMEM43	NM_024334	2.26523294160029	0.0000693548835108501
1727	ARPC1A	NM_006409	2.07446418860422	0.0000699865970651715
1728	HNRNPA0	NM_006805	2.07580954547818	0.0000700685875307781
1729	TTLL5	NM_015072	0.445567257899196	0.0000704559293345998
1730	GTF2E1	NM_005513	2.1429123787686	0.0000708661612039512
1731	NUDT12	NM_031438	2.37441299899147	0.0000709324374180276
1732	VPS8	NM_015303	2.80443792657098	0.0000713990425197061
1733	C5orf28	NM_022483	2.09261916827654	0.0000716073914747649
1734	KRTAP10-1	NM_198691	0.149588674286296	0.0000718009918229665
1735	TSGA10	NM_025244	3.39133550197455	0.0000718449886510146
1736	ZNF774	NM_001004309	0.456002089353977	0.0000719353111916945
1737	THAP2	NM_031435	3.18709620757177	0.000072781501104129
1738	P4HA3	NM_182904	0.217139593450851	0.0000729910759398515
1739	FAM83G	NM_001039999	0.277898378772866	0.0000734355269138502
1740	MED21	NM_004264	2.16841359248631	0.0000734355269138502
1741	SP1	NM_138473	0.468842260193466	0.0000736070455551336
1742	TNKS	NM_003747	2.27724136241158	0.0000739144608818947
1743	GRAMD1B	NM_020716	0.386338888881898	0.0000739144608818947
1744	SNORA64	NR_002326	0.0658839371164555	0.0000745180257278803
1745	CSDC2	NM_014460	0.311863849724491	0.0000749140862744094
1746	TECPR1	NM_015395	0.336668985371757	0.0000749140862744094
1747	VPS18	NM_020857	0.417384319092748	0.0000749140862744094
1748	INTS10	NM_018142	3.8206180747155	0.0000750018344853163
1749	ZNF843	NM_001136509	0.206193413470818	0.0000752180026495377
1750	MYO9B	NM_004145	0.461410305557505	0.0000754354461439032
1751	UBE2Q2	NM_173469	2.28038777515464	0.0000756203722178493
1752	TRADD	NM_003789	9.58113956281204	0.000075726061077985
1753	CD74	NM_001025159	4.48025658477036	0.0000758213217763118
1754	SLC31A1	NM_001859	2.28913894302817	0.0000758501939772701
1755	SCARB2	NM_005506	0.433165607145518	0.000076282222105995
1756	SF3B5	NM_031287	0.38245713335576	0.0000768551796537995
1757	DNAJB5	NM_001135004	0.338611734645755	0.0000776458404577376
1758	ITIH4	NM_002218	0.195741636100765	0.0000778999335500949
1759	C15orf62	NM_001130448	0.312636916520045	0.0000785493579136808
1760	LEPREL4	NM_006455	0.359697435079764	0.0000786911275665204
1761	DNAAF2	NM_018139	0.435534834523409	0.0000787231392822249
1762	DNAJC18	NM_152686	2.34323466041894	0.0000788165011571169
1763	DPH1	NM_001383	0.434951173261108	0.0000788548985780514
1764	RHOBTB3	NM_014899	4.11326746579174	0.0000790060792315374
1765	FARSB	NM_005687	3.24291465878754	0.0000797841621516955
1766	CEP192	NM_032142	2.16112890034585	0.0000799878917897137
1767	BCL2	NM_000633	0.0793312047428662	0.0000799963452522687
1768	ZNF783	NM_001195220	0.471822303178929	0.0000800981119957016
1769	SNUPN	NM_001042588	2.78499397873109	0.0000806228964410904
1770	FAM219A	NM_001184940	0.313650233928569	0.0000806270373289832
1771	ACSL3	NM_203372	3.5163131766233	0.0000806270373289832
1772	KIAA0513	NM_014732	0.319258415425878	0.0000807467859853255
1773	TRMU	NM_018006	0.491192442098078	0.0000808557136078912
1774	HIF3A	NM_152795	0.0416592154884354	0.0000827500236152812
1775	EIF4E2	NM_004846	0.390993286032488	0.000082917954067805
1776	TMEM131	NM_015348	3.35895276937317	0.0000829989484096441
1777	PAIP1	NM_006451	2.09301846812637	0.0000834059618611021
1778	SNX33	NM_153271	0.166876363224147	0.0000848573172349717
1779	RAB40AL	NM_001031834	0.18319609857558	0.0000858240048752799
1780	STK19	NM_004197	0.358924451788867	0.0000860024226458715
1781	RIOK2	NM_018343	2.50050757886017	0.0000860508245372601
1782	MBTPS2	NM_015884	2.15005534415332	0.0000866260632038164
1783	SEC31A	NM_014933	0.497443889666013	0.0000867461898777662
1784	CEP152	NM_001194998	7.6626470985391	0.0000868691527969452
1785	ZSWIM5	NM_020883	0.480496156107427	0.000087844296125996
1786	INTS3	NM_023015	2.65939107722351	0.0000888882950504256
1787	IL13RA1	NM_001560	4.9741198582335	0.0000893891896094494
1788	MRPL51	NM_016497	0.366118967912504	0.0000896670147935969
1789	CAMKK1	NM_172206	0.441631033020412	0.000089760161744524
1790	TAF11	NM_005643	2.20992990900916	0.0000899102508700206
1791	ZXDC	NM_025112	0.466796032209906	0.0000899102508700206
1792	TBC1D3	NM_001123391	0.272955881924963	0.0000904360209761521
1793	STAG2	NM_001042749	3.57202422188816	0.0000906879477821977
1794	PRC1	NM_003981	8.2060988631456	0.000091139622893489
1795	ZNF845	NM_138374	3.44005535111348	0.0000912199371517492
1796	NXPE3	NM_145037	2.26703412455219	0.0000913692211114263
1797	DOCK6	NM_020812	0.248864575744008	0.0000916930524650956
1798	NRG2	NM_013982	2.95841701910285	0.0000923354303095839
1799	POLR3B	NM_018082	2.80957359107383	0.0000923354303095839
1800	PDZD11	NM_016484	2.33668329660255	0.0000934588015801724
1801	TRIM25	NM_005082	0.418184386461148	0.0000952915370562965
1802	INSIG2	NM_016133	3.5826726080979	0.0000952915370562965
1803	TGFBR1	NM_004612	2.62686274516366	0.0000975775456617494
1804	SLC25A33	NM_032315	0.363736962014543	0.000100497958556548
1805	IFNAR1	NM_000629	2.15049658665146	0.000100543154486271
1806	NT5DC2	NM_001134231	0.416415237967971	0.000100543154486271
1807	ANKRD35	NM_144698	0.208501468287969	0.000101028197543266
1808	MUM1	NM_032853	0.478273159327337	0.000101467190653296
1809	CA4	NM_000717	0.128730833832377	0.000102186773526001
1810	PPP1CC	NM_002710	2.55434369711401	0.000102690456017259
1811	NAT16	NM_198571	27.0404285202029	0.000104077129141577
1812	TSC1	NM_000368	2.07371408140001	0.000104120943687898
1813	ZFYVE28	NM_020972	0.386673459598945	0.000104243834175784
1814	ABCC1	NM_004996	0.343486204103177	0.000105295522332695
1815	ABL2	NM_005158	2.27243568529709	0.000105295522332695
1816	UTP14A	NM_006649	2.96687761180554	0.000105710326199778
1817	DTYMK	NM_012145	0.364983261221103	0.000105759338924601
1818	ZNF341	NM_032819	0.404139883238968	0.000106970292049726
1819	HSPA13	NM_006948	2.46498341261566	0.000107144413966169
1820	DEXI	NM_014015	3.25609010186172	0.000107144413966169
1821	LURAP1L	NM_203403	0.15668590294876	0.000108008678748584
1822	NOP2	NM_006170	2.04244683066398	0.000108050380738093
1823	SEC23B	NM_032986	2.14217106462557	0.000108050380738093
1824	YPEL1	NM_013313	2.72625044408802	0.000108060718244486
1825	FAXDC2	NM_032385	3.34529289895168	0.000108510501979798
1826	GNAO1	NM_138736	2.10284977944419	0.000108917790218026
1827	FYTTD1	NM_032288	2.25832100896256	0.000109298888186885
1828	SEMA5A	NM_003966	0.0737902971391138	0.000109676081608053
1829	EXD3	NM_017820	0.337293021953967	0.000110008282448231
1830	CNTF	NM_000614	45.9385735819874	0.000110086952732992
1831	TSEN15	NM_052965	3.78457821505258	0.000110786659516729
1832	C1QBP	NM_001212	0.369907348005282	0.000111122658243904
1833	DTX3	NM_178502	0.459313077956644	0.000111237999940374
1834	STOM	NM_004099	2.76883688228293	0.000112993617334415
1835	RAB27B	NM_004163	6.00936790113491	0.000113529278595357
1836	ARL6IP5	NM_006407	2.12339919989129	0.000113529278595357
1837	PAN2	NM_001127460	0.34736503708611	0.00011366314940145
1838	UNKL	NM_001193388	0.407641153088514	0.00011366314940145
1839	SIRT5	NM_012241	3.87288512823925	0.000113819086293906
1840	ARNTL2	NM_020183	7.13216100877042	0.00011393407984569
1841	ANTXR1	NM_032208	2.85401497716188	0.000115012333598859
1842	WDR76	NM_024908	0.356469677283077	0.000115363198569212
1843	NEK3	NM_001146099	0.303124998391244	0.000115605142743861
1844	PTPN13	NM_080685	2.7428835134586	0.000115605142743861
1845	PCOLCE	NM_002593	0.153297369371986	0.000116843340010022
1846	SAMD5	NM_001030060	0.0844248249517052	0.000117850713266798
1847	DDX18	NM_006773	2.36304298972072	0.000117987927020508
1848	CAPRIN2	NM_001002259	0.430457854591017	0.000118270294998758
1849	TCF20	NM_005650	0.493702705873756	0.000118563707064895
1850	ARRDC2	NM_015683	0.168485236729985	0.000120800783880089
1851	FAM163A	NM_173509	0.0522710923196689	0.000120914128807332
1852	ANAPC15	NM_014042	2.24765688053775	0.000121115261329685
1853	SLC23A2	NM_203327	2.80233127736405	0.000121202959721517
1854	GRPEL1	NM_025196	2.03194968208376	0.000125098253737588
1855	TMEM65	NM_194291	3.07365257036021	0.000125687319966119
1856	WDR65	NM_001167965	0.157451679699558	0.000128490046183226
1857	MCOLN1	NM_020533	0.398069955489425	0.000128670588219797
1858	NBEAL2	NM_015175	0.414389920192911	0.000130014946599967
1859	RBBP5	NM_005057	3.47265130765461	0.000130101317354781
1860	SUFU	NM_016169	5.06162789779007	0.000130101317354781
1861	SNX6	NM_152233	2.50759110294185	0.000130784983619705
1862	DCAF11	NM_001163484	2.03430853517283	0.000132339547372341
1863	RER1	NM_007033	2.28933389208017	0.000133880151804352
1864	GRB2	NM_002086	2.22528701144614	0.000134687540974347
1865	TNFRSF14	NM_003820	0.1161188286981	0.000134764644935266
1866	SLC36A1	NM_078483	6.99856527259998	0.000134898282098276
1867	MORF4L1	NM_206839	2.04559105794747	0.000135410791535191
1868	PIK3C2B	NM_002646	2.52540041773597	0.000135432692363744
1869	DMTF1	NM_001142327	3.68242225497812	0.000136850142115646
1870	ZNF844	NM_001136501	0.219433220587329	0.000137592825922346
1871	FZD5	NM_003468	0.256703927733275	0.000141223570244279
1872	FASTKD1	NM_024622	3.70147486402273	0.000141223570244279
1873	SPAG4	NM_003116	0.263922378148071	0.000141376195930362
1874	NBPF15	NM_173638	2.94287113566475	0.000142187347440524
1875	MAN1A1	NM_005907	6.42683053398266	0.000146783575745865
1876	ALG9	NM_001077690	2.55421710688776	0.000147462423575802
1877	SUPT6H	NM_003170	0.45874047176021	0.000148754945100857
1878	CCBL2	NM_001008661	2.80009934414535	0.000148797007004353
1879	MAPK6	NM_002748	2.88385519587769	0.00014985044644816
1880	SMURF2	NM_022739	3.32899382168939	0.000150808615722209
1881	STOX2	NM_020225	0.371200115547971	0.000152416844568002
1882	TMEFF1	NM_003692	5.129979100452	0.000152774541830809
1883	MAN2A1	NM_002372	3.2064866575994	0.000153330448901206
1884	PYURF	NM_032906	0.489475336686947	0.000153938901595777
1885	TCEAL5	NM_001012979	3.24471723098047	0.00015409330508033
1886	MICALL1	NM_033386	0.409085248489006	0.000155955787401445
1887	HSF4	NM_001040667	0.360652256910216	0.000156699761300748
1888	SAT2	NM_133491	2.99966918939512	0.000157079170603047
1889	PDDC1	NM_182612	0.273605465214377	0.00015747482026637
1890	L2HGDH	NM_024884	2.44484320153652	0.000157639489343258
1891	ROCK2	NM_004850	2.16839624222177	0.000158553624552479
1892	RHOT2	NM_138769	0.432397011432892	0.000158701259731942
1893	YWHAE	NM_006761	2.0878428217044	0.000159479331287514
1894	DDX17	NM_001098504	2.70920507465902	0.000159520117008369
1895	CCDC132	NM_017667	3.06395699249443	0.000160135819923405
1896	NCKAP5	NM_207363	6.7476738803235	0.000160135819923405
1897	GM2A	NM_000405	3.04361388810446	0.000160139502341586
1898	STK39	NM_013233	3.505349077726	0.000160192327415987
1899	BLZF1	NM_003666	2.50767527002967	0.000160403436161069
1900	BTC	NM_001729	3.95317508347516	0.000160474223581246
1901	SMIM4	NM_001124767	0.311622035629389	0.000161630616417685
1902	ITPRIPL2	NM_001034841	0.209111012558166	0.000162187374938269
1903	MTO1	NM_001123226	2.48482334331459	0.000162187374938269
1904	TNFRSF21	NM_014452	4.94791956874814	0.000162192470705625
1905	C1orf198	NM_032800	4.00712921119394	0.000162401723875967
1906	FLRT3	NM_013281	5.65253931097873	0.000165134608165276
1907	DUSP28	NM_001033575	0.426523848611594	0.000166185925867209
1908	ALG1	NM_019109	0.428812567391404	0.000166787948220368
1909	ROPN1L	NM_001201466	0.196224333354115	0.000167333728903609
1910	C11orf70	NM_032930	2.44235688905885	0.00016796612184265
1911	TRAF6	NM_004620	3.76504932319335	0.000168525701710841
1912	NCEH1	NM_001146276	2.92219812907102	0.000169456779431517
1913	RADIL	NM_018059	0.241005065968511	0.000171409238134145
1914	LCN12	NM_178536	5.12621079473607	0.000171706167069496
1915	OR5C1	NM_001001923	0.180117861384449	0.000172512421738712
1916	GUCA1C	NM_005459	31.4963340824358	0.0001727004183604
1917	GINM1	NM_138785	2.79295346617851	0.000174193537129622
1918	ZNF350	NM_021632	2.77394523914451	0.000174215318806416
1919	GEMIN4	NM_015721	2.64782121556304	0.000175916826621128
1920	DNPEP	NM_012100	0.33724392526936	0.000176999292545461
1921	SCN2B	NM_004588	7.01889151164209	0.00017780275009169
1922	RSC1A1	NM_006511	0.490827854193515	0.000178445853814729
1923	PEA15	NM_003768	3.01986456071576	0.000179187548852451
1924	SNX29	NM_032167	0.459704245877531	0.000179982063894886
1925	IKBKB	NM_001556	0.395852864704712	0.000181306968171226
1926	NUSAP1	NM_018454	4.29276646841844	0.000181707441866392
1927	C2orf68	NM_001013649	0.488204116834103	0.000182716862746927
1928	PDIA3	NM_005313	2.19529550410301	0.000182716862746927
1929	CYP4V2	NM_207352	0.398276926065662	0.000182739969386786
1930	MRPS10	NM_018141	2.20242599691046	0.000183520103151382
1931	STAU2	NM_001164380	0.474996182137856	0.000184198098209171
1932	ACACB	NM_001093	0.442718864984787	0.000184324123868967
1933	IFI6	NM_022873	3.24585563759517	0.000184828075409528
1934	CLCN5	NM_001127898	2.42242437924823	0.000186203087634767
1935	FMNL1	NM_005892	0.455900327554547	0.000186496559870557
1936	CAPS2	NM_032606	4.60855007259887	0.000186598022888905
1937	TMEM14E	NM_001123228	0.296107809697802	0.000186952634152798
1938	FAM45A	NM_207009	2.56787642199618	0.000187715832311798
1939	LRRN3	NM_018334	5.04127757261897	0.000187733932615236
1940	DTL	NM_016448	15.6782432194927	0.00018774862297152
1941	TIMP4	NM_003256	0.0806986405362631	0.000188462189905457
1942	NSMCE1	NM_145080	0.464192448422337	0.000189260633060797
1943	NMNAT2	NM_015039	2.7664770214871	0.00018985644415356
1944	COX7A1	NM_001864	0.365449806042958	0.000190098640929004
1945	BCAP29	NM_001008405	2.18774184170376	0.000190656194768416
1946	ABCC4	NM_005845	3.47090973688322	0.000190725477161321
1947	PIGZ	NM_025163	6.03373392840932	0.000190937481218572
1948	POLE	NM_006231	0.4121857399428	0.000191104855122564
1949	ARMC5	NM_001105247	0.39707657994255	0.000193009347592756
1950	RASGRF1	NM_001145648	19.1909536025249	0.000193742268821966
1951	GLS	NM_014905	2.24903698410592	0.000194763552277725
1952	PIM2	NM_006875	0.460520838659147	0.000198149185103024
1953	EML3	NM_153265	0.450504695244058	0.000198497229452404
1954	GEM	NM_005261	0.173423068103293	0.000199650490112764
1955	WBP5	NM_001006613	3.54735851472834	0.000199742492575286
1956	APOPT1	NM_032374	13.6082432816316	0.000201582918566378
1957	MFSD6	NM_017694	0.430440394086335	0.000204845660172153
1958	HTATSF1	NM_014500	0.473806749854731	0.000205331773525547
1959	TIMM8B	NM_012459	2.38027136451868	0.000206706020615325
1960	NHLRC2	NM_198514	2.23749230430637	0.000207047558869693
1961	LPCAT4	NM_153613	2.19821526569347	0.000208624972379582
1962	CXorf38	NM_144970	3.59972295126892	0.000209249980247163
1963	TLE1	NM_005077	0.309799442380935	0.000209446432229307
1964	ACAP3	NM_030649	0.257902553845867	0.000210095109346823
1965	MMGT1	NM_173470	2.12614735563467	0.000210095109346823
1966	ANGPT2	NM_001147	25.2347346112205	0.00021011928343259
1967	BBS9	NM_198428	0.493911656257098	0.00021105189665685
1968	YWHAG	NM_012479	0.353960655246616	0.00021253826205383
1969	TNIP2	NM_024309	0.451699362329412	0.000213168898045483
1970	NOMO1	NM_014287	2.18503311725896	0.000213446488658326
1971	SLC35G5	NM_054028	0.148267554134733	0.000213446488658326
1972	TNFRSF11A	NM_003839	0.146387988479257	0.000213623314394608
1973	CCBL1	NM_004059	0.456143751814485	0.000215839440806097
1974	GPR108	NM_001080452	0.499676769150734	0.000216111234476188
1975	NAA10	NM_003491	0.370902849169897	0.000216111234476188
1976	WDR60	NM_018051	2.47729088100754	0.000216498777041981
1977	ITGB3BP	NM_001206739	3.46075694440845	0.000216597840966925
1978	AASDH	NM_181806	3.20559373655118	0.000217828999343203
1979	SNORD15B	NR_000025	0.282336467354933	0.000218026340156688
1980	NME7	NM_013330	0.471068740461887	0.00021876902175885
1981	ADO	NM_032804	0.453764351102223	0.000218843293782856
1982	TRIM66	NM_014818	0.382786073730909	0.000219116358162358
1983	CITED1	NM_001144885	3.12068557754122	0.000220800204235115
1984	IBA57	NM_001010867	0.458462102411552	0.000222577000768358
1985	ASL	NM_000048	0.494662748654596	0.000223982475585468
1986	C1orf122	NM_198446	0.275297558499712	0.000223982475585468
1987	SGCE	NM_001099400	2.31597773400475	0.000223995997539118
1988	GIN1	NM_017676	2.71467099051777	0.000225300011309427
1989	AMIGO3	NM_198722	0.32593026852335	0.000227970160893651
1990	SOX13	NM_005686	0.358585201269446	0.000228639349956515
1991	CALCOCO1	NM_020898	0.408019809054661	0.000229060028546277
1992	CDH2	NM_001792	2.39009576784201	0.000232351053277965
1993	ARHGAP44	NM_014859	2.22261472907986	0.000232351053277965
1994	NUPR1	NM_001042483	0.127148004672956	0.000233379349269995
1995	LRP8	NM_004631	0.359367505252785	0.000233379349269995
1996	C10orf107	NM_173554	3.3145553249054	0.000233379349269995
1997	ZNF793	NM_001013659	0.487406286394321	0.00023533561156758
[truncated: 1,762 more rows]

## Sheet: Table S3
Supplementary Table S3
The list of gene-annotated DMPs which methylation levels are correlated with expression levels of the annotated genes
		Differential DNA methylation					Sperarman correlation
nr	genenames	CpG site	deltaBeta	Adj. P_value	Feature	CGI	cor_coef	P_value
1	HIF3A	cg16672562	0.530051	3.22169e-10	5'UTR	shore	-0.407389	0.0291448
2	HIF3A	cg05286653	0.334709	0.00263772	Body	island	-0.489655	0.00765114
3	COL9A2	cg14285050	0.248558	6.4954e-09	Body	shelf	-0.398522	0.0331144
4	APOL4	cg11420782	0.336829	7.33551e-12	5'UTR	opensea	-0.551503	0.00192799
5	BCAT1	cg14878913	-0.413396	1.52184e-08	Body	opensea	0.37654	0.0440803
6	FAM163A	cg26334801	0.261236	0.00841314	5'UTR	shore	-0.80197	1.50657e-06
7	TCIRG1	cg26898077	0.271463	1.08282e-10	Body	opensea	-0.534483	0.00322977
8	TIMP4	cg16791134	0.475881	1.71911e-10	TSS1500	shore	-0.46624	0.0107936
9	TIMP4	cg10173186	0.346994	0.00193756	1stExon	island	-0.803844	1.50659e-07
10	TIMP4	cg10958002	0.286992	0.0061378	1stExon	island	-0.764416	1.38638e-06
11	RARRES2	cg19310340	0.217405	0.00157835	Body	shore	-0.572906	0.00140729
12	ZBTB16	cg25101936	0.247734	4.95432e-06	TSS1500	shore	-0.406404	0.0295656
13	ZBTB16	cg03725573	0.242435	0.000211544	Body	opensea	-0.399015	0.0328829
14	DSCAM	cg14603539	0.377665	0.000156965	Body	shore	-0.461804	0.0116732
15	AGR2	cg21201572	0.345167	1.21742e-12	5'UTR	opensea	-0.367902	0.049582
16	RASD1	cg11245205	0.311892	0.000651945	3'UTR	island	-0.597537	0.000784396
17	KRT18	cg07652628	0.414097	0.00014852	Body	shore	-0.858128	8.84796e-07
18	KRT18	cg04799958	0.409068	0.00018182	Body	shore	-0.885714	5.92955e-07
19	KRT18	cg14212748	0.376989	0.000235891	Body	shore	-0.80936	1.38143e-06
20	IGFBP6	cg06559575	0.287843	5.39062e-06	TSS1500	shore	-0.47931	0.00920207
21	IGFBP6	cg04791129	0.238986	9.555e-06	TSS1500	shore	-0.453695	0.014228
22	IGFBP6	cg27409154	0.202333	2.66937e-05	TSS1500	shore	-0.482266	0.00873391
23	CYS1	cg02984430	0.333891	0.00471727	Body	shore	-0.577312	0.00104176
24	LDLRAP1	cg06359931	0.438212	6.21189e-09	Body	opensea	-0.558621	0.00193746
25	LDLRAP1	cg10867751	0.337195	6.0995e-07	Body	island	-0.694089	4.70308e-05
26	LDLRAP1	cg09261020	0.39498	0.000589242	TSS200	island	-0.599015	0.000756279
27	NUPR1	cg01542023	0.201523	9.5848e-07	TSS200	opensea	-0.566995	0.00160897
28	NUPR1	cg01803679	0.251958	1.87133e-06	5'UTR	opensea	-0.605419	0.000644352
29	C1S	cg22402467	0.311832	3.57471e-08	1stExon	opensea	-0.461084	0.0125852
30	FOSL2	cg25784219	0.600865	1.19435e-06	Body	shore	-0.766502	3.34979e-06
31	FOSL2	cg23522611	0.548031	3.3757e-06	Body	shore	-0.72266	1.67622e-05
32	RPS6KA2	cg15215978	-0.402019	9.72743e-05	Body	opensea	0.445813	0.0161753
33	FOSL2	cg24397007	0.311921	0.000376732	Body	shelf	-0.45665	0.0135505
34	GPR133	cg26922917	0.334284	0.000829958	Body	shore	0.539901	0.00288847
35	CHST1	cg01559259	0.270061	2.47885e-17	TSS1500	shore	-0.544513	0.00225886
36	CHST1	cg23380672	0.418295	2.82697e-07	5'UTR	shelf	-0.60074	0.000569269
37	FGF1	cg19683675	0.582467	5.04388e-12	TSS200	opensea	-0.413504	0.0257672
38	FGF1	cg19445684	0.226992	8.55055e-06	5'UTR	opensea	-0.436668	0.0178664
39	FGF1	cg15371881	0.274822	0.000608376	5'UTR	opensea	-0.479547	0.00848075
40	FGF1	cg05198969	0.285701	0.000752124	5'UTR	opensea	-0.372105	0.0468414
41	ELN	cg05010648	0.331609	2.37631e-11	Body	opensea	-0.464039	0.0119744
42	ELN	cg26153045	0.41076	8.84926e-06	TSS1500	opensea	-0.425616	0.0222055
43	ELN	cg23129573	0.493596	2.56955e-05	5'UTR	opensea	-0.576355	0.0013001
44	ELN	cg05822532	0.389773	0.000315671	1stExon	opensea	-0.475862	0.00977501
45	MERTK	cg14900246	0.478752	4.98881e-10	TSS1500	shore	-0.527586	0.00371405
46	MERTK	cg08023751	0.373138	4.61621e-09	TSS1500	shore	-0.434483	0.0193616
47	MFAP4	cg13030582	0.457691	9.83338e-09	TSS1500	opensea	-0.678325	7.97461e-05
48	MFAP4	cg10351914	0.494761	4.19797e-08	TSS200	opensea	-0.546305	0.00252568
49	MFAP4	cg19169154	0.260597	4.85467e-08	Body	opensea	-0.485222	0.00828613
50	MFAP4	cg15119221	0.450737	6.98661e-08	TSS1500	opensea	-0.611823	0.000547176
51	MFAP4	cg09606564	0.596213	5.49944e-07	Body	opensea	-0.688177	5.75338e-05
52	MFAP4	cg25216196	0.436976	1.34984e-05	TSS200	opensea	-0.554187	0.00213381
53	MFAP4	cg07727884	0.417462	1.35586e-05	TSS200	opensea	-0.500985	0.00621356
54	MFAP4	cg00192882	0.224138	3.92059e-05	TSS1500	opensea	-0.714778	2.24754e-05
55	DOK7	cg12918895	0.52314	3.90422e-06	TSS200	island	-0.553202	0.00217972
56	DOK7	cg25237365	0.518722	1.34111e-05	TSS200	island	-0.491626	0.00738252
57	CHRD	cg25182621	0.263302	3.71621e-07	TSS1500	shore	-0.394822	0.0340374
58	MIA	cg19023552	0.216092	1.62032e-05	1stExon	shelf	-0.419653	0.0234351
59	SQRDL	cg06864443	0.360041	0.000126966	5'UTR	shelf	-0.572347	0.00117733
60	LRRC10B	cg02674352	0.381402	0.000259645	TSS1500	island	-0.46798	0.011199
61	LRRC10B	cg26786382	0.202907	0.00181591	1stExon	island	-0.472906	0.0102899
62	CDKN1A	cg15474579	0.348803	2.64882e-11	TSS1500	shore	-0.443842	0.0166955
63	CDKN1A	cg11920449	0.365577	2.2484e-08	TSS1500	shore	-0.417241	0.0252012
64	CDKN1A	cg18900812	0.47816	1.01104e-07	TSS1500	shore	-0.385222	0.0398871
65	CDKN1A	cg03714916	0.452217	2.99797e-07	TSS1500	shore	-0.409852	0.0281143
66	LSP1	cg16903735	0.25762	7.54723e-05	Body	island	-0.665025	0.000121665
67	LSP1	cg24552015	0.231931	0.000104594	5'UTR	island	-0.415764	0.0257629
68	LSP1	cg09989681	0.227055	0.000318925	5'UTR	island	-0.385222	0.0398871
69	LSP1	cg08148802	0.307334	0.000639444	Body	island	-0.45665	0.0135505
70	NPTX2	cg21661022	0.222935	0.000180617	3'UTR	opensea	0.474877	0.00994415
71	SLC1A5	cg01406381	0.688076	8.62378e-12	TSS200	shelf	-0.587192	0.00100806
72	SLC1A5	cg21766592	0.543621	1.88661e-09	1stExon	shelf	-0.762562	3.81373e-06
73	SLC1A5	cg03359362	0.528138	2.45764e-09	TSS1500	shore	-0.490148	0.00758322
74	SLC1A5	cg25607249	0.446836	1.25232e-08	1stExon	shelf	-0.695567	4.46896e-05
75	SLC1A5	cg07626482	0.357324	2.87471e-06	TSS1500	shore	-0.552709	0.00220299
76	SLC1A5	cg11341711	0.338635	0.00155232	Body	shore	-0.435468	0.0190652
77	PCOLCE	cg26122963	0.431852	1.61999e-09	TSS1500	shelf	-0.421675	0.0235762
78	PCOLCE	cg02797569	0.286066	2.08494e-07	1stExon	shore	-0.386207	0.0393498
79	PRSS8	cg08775835	0.470573	3.7597e-07	1stExon	opensea	-0.785609	4.45219e-07
80	PRSS8	cg13439730	0.363405	4.1199e-06	1stExon	opensea	-0.559389	0.00160584
81	PLAGL1	cg17870553	-0.210738	0.00719663	5'UTR	opensea	0.830458	2.48997e-08
82	PRSS8	cg27436259	0.320823	6.49153e-06	1stExon	opensea	-0.744209	3.6915e-06
83	PRSS8	cg03363863	0.399443	7.44607e-06	1stExon	opensea	-0.765402	1.31848e-06
84	PRSS8	cg04275947	0.218233	0.000202145	Body	opensea	-0.65796	0.00010482
85	ETV1	cg03985360	0.349443	0.000296963	Body	opensea	0.458621	0.013114
86	ETV1	cg21463790	0.254819	0.00198009	1stExon	shelf	0.623153	0.000406291
87	FKBP11	cg22864266	0.374849	0.00039686	TSS1500	shore	-0.461576	0.0124816
88	HAAO	cg20289949	0.433767	6.00477e-06	1stExon	shore	-0.374877	0.0458961
89	NEUROD4	cg15545660	-0.296925	0.00839755	Body	opensea	0.63726	0.000201033
90	HAAO	cg06913600	0.200249	4.63887e-05	TSS1500	shore	-0.660591	0.000139432
91	OSBPL10	cg02570354	0.221	9.82253e-07	Body	opensea	-0.492118	0.00731663
92	OSBPL10	cg24391989	0.229805	3.18668e-05	Body	opensea	-0.399507	0.0326527
93	OSBPL10	cg27246744	0.330273	0.00108146	Body	opensea	-0.438424	0.0181988
94	RCAN1	cg05056497	0.606292	1.29381e-08	5'UTR	opensea	-0.5133	0.00491922
95	TGM2	cg17083925	0.341187	5.66313e-06	Body	shore	-0.511823	0.00506116
96	RAB20	cg16728323	0.218634	0.000341117	Body	shore	-0.442365	0.0170948
97	SNX33	cg01968002	0.225941	7.03617e-06	5'UTR	shore	-0.591945	0.000718114
98	NR2F1	cg07777270	0.219279	0.000134825	Body	shore	-0.410345	0.0279119
99	ESR1	cg04211581	0.238877	0.0066351	1stExon	opensea	-0.482964	0.00795934
100	EPHA2	cg26371327	0.24691	5.07801e-06	Body	shore	-0.552709	0.00220299
101	EPHA2	cg22874802	0.213804	0.000113809	Body	shelf	-0.646798	0.000210184
102	EPHA2	cg21647035	0.226618	0.000121523	Body	shore	-0.479803	0.00912259
103	NLRP1	cg22642477	0.312711	0.000143805	TSS1500	opensea	-0.725951	8.30419e-06
104	TACC2	cg26186546	0.32639	2.22083e-19	Body	opensea	-0.576918	0.001052
105	TACC2	cg11535638	0.435777	3.02185e-08	Body	opensea	-0.545387	0.00221497
106	TACC2	cg23304023	0.359594	0.000408969	Body	opensea	-0.382313	0.0406825
107	GPR62	cg12593812	0.256977	0.00115636	1stExon	island	-0.382806	0.0404025
108	RGS16	cg06875985	0.508524	9.29241e-13	Body	shore	-0.425616	0.0222055
109	ALDH2	cg20884605	0.536788	2.71301e-08	Body	shore	-0.665025	0.000121665
110	VAV2	cg14069928	0.3705	2.33758e-05	Body	shore	0.461576	0.0124816
111	VAV2	cg14129329	0.275477	0.00297461	Body	opensea	0.663054	0.000129299
112	PLEKHA4	cg06705122	0.245744	1.52203e-06	5'UTR	opensea	-0.718719	1.94232e-05
113	PLEKHA4	cg06339706	0.210293	5.86888e-06	5'UTR	opensea	-0.787192	1.9281e-06
114	RAPGEF3	cg14854517	0.267454	4.18726e-08	1stExon	shore	-0.697537	4.17311e-05
115	GPR133	cg22377064	-0.520925	1.54742e-08	Body	opensea	0.525616	0.0038634
116	WBSCR17	cg21886089	-0.273986	0.00125968	Body	opensea	0.416683	0.024539
117	RAPGEF3	cg21166775	0.255597	0.000171951	1stExon	shore	-0.557635	0.00197968
118	CSRNP1	cg03540589	0.570251	6.4838e-07	5'UTR	shore	-0.697044	4.24537e-05
119	CSRNP1	cg24791666	0.551924	9.59767e-07	5'UTR	shelf	-0.678325	7.97461e-05
120	WBSCR17	cg25673355	-0.252844	0.00142763	Body	opensea	0.478293	0.00867913
121	CSRNP1	cg16643088	0.587358	1.65812e-06	5'UTR	shelf	-0.703941	3.32947e-05
122	GPRIN3	cg14665366	0.40882	3.50812e-07	5'UTR	shore	-0.650739	0.000187313
123	GPRIN3	cg02734358	0.425984	6.69943e-05	5'UTR	shore	-0.440394	0.0176396
124	SIX5	cg14282004	0.517745	1.98105e-07	Body	island	-0.464532	0.0118751
125	SIX5	cg27181142	0.2415	7.9792e-06	Body	island	-0.5	0.00632864
126	WBSCR17	cg11687681	-0.251812	0.00248473	Body	shore	0.520036	0.00383284
127	SIX5	cg24338091	0.237807	8.25626e-05	Body	island	-0.589163	0.000961617
128	SIX5	cg25686087	0.213638	0.000323031	Body	island	-0.516256	0.00464556
129	DTX4	cg17696194	0.246538	0.00385185	Body	island	-0.471921	0.0104665
130	SYT7	cg13027727	0.224368	6.13593e-06	Body	opensea	0.368966	0.0496441
131	LGALS3	cg01051098	0.44918	7.09903e-11	Body	opensea	-0.514286	0.0048265
132	PPP1R13L	cg18064256	0.256905	0.00594614	5'UTR	shelf	0.45468	0.0139991
133	CRIP1	cg25682097	0.386477	1.30539e-05	Body	island	-0.592611	0.000884816
134	NOTCH1	cg14225168	0.292777	7.95673e-15	Body	shore	-0.55665	0.0020227
135	SNTG2	cg04103052	-0.263294	0.00458927	Body	opensea	0.735083	5.5814e-06
136	NOTCH1	cg14363954	0.236065	2.1569e-05	Body	shore	-0.424138	0.0227115
137	NOTCH1	cg01909856	0.281012	3.55524e-05	Body	shore	-0.617734	0.000469107
138	NOTCH1	cg13547889	0.224686	0.000156407	Body	opensea	-0.559113	0.00191664
139	NOTCH1	cg00127408	0.231249	0.000222268	Body	shore	-0.54532	0.00257878
140	NOTCH1	cg00407944	0.201764	0.00037694	Body	shore	-0.578325	0.0012421
141	WDR66	cg15417875	0.278567	2.20697e-14	Body	opensea	-0.465025	0.0117764
142	CCDC88C	cg23304605	0.228832	6.63155e-09	Body	opensea	-0.455967	0.0129212
143	CCDC88C	cg27663123	0.252059	1.12279e-07	Body	opensea	-0.400296	0.031419
144	ETV1	cg02971555	-0.285439	0.00126851	3'UTR	opensea	0.794089	1.69419e-06
145	CCDC88C	cg10946510	0.214835	9.6357e-05	Body	opensea	-0.461633	0.0117082
146	METTL7A	cg03856949	0.547562	1.15455e-08	TSS1500	opensea	-0.673399	9.34767e-05
147	VAV2	cg13836412	-0.261395	0.000543092	3'UTR	opensea	0.576847	0.00128539
148	VAV2	cg25268422	-0.251036	0.00197946	Body	island	0.639901	0.000256156
149	METTL7A	cg18399183	0.354526	2.57195e-06	TSS1500	opensea	-0.671429	9.95298e-05
150	SLC16A4	cg00961640	0.422732	2.74321e-11	TSS200	opensea	-0.543842	0.00266025
151	TRIM2	cg17852507	-0.233445	0.00172557	Body	opensea	-0.434483	0.0193616
152	TLE3	cg09747445	0.318837	4.59529e-06	Body	shore	-0.570936	0.00147192
153	ATP11A	cg12511137	0.219266	2.1708e-14	Body	shelf	-0.380296	0.0426637
154	ATP11A	cg11360522	0.369565	3.84793e-12	Body	shelf	-0.531034	0.00346462
155	ATP11A	cg19293163	0.30127	7.42606e-10	Body	shore	-0.484236	0.00843317
156	ATP11A	cg25457815	0.334904	4.71539e-09	Body	shore	-0.456158	0.0136615
157	ATP11A	cg22301418	0.245085	1.40222e-08	Body	opensea	-0.498522	0.00650467
158	ATP11A	cg23049429	0.391304	2.18659e-06	Body	shore	-0.382266	0.0415349
159	PDLIM2	cg00920139	0.282833	4.04131e-06	3'UTR	shore	-0.430595	0.0197129
160	PDLIM2	cg02637537	0.27518	0.000194395	Body	opensea	-0.395615	0.0336472
161	C10orf11	cg05496768	-0.316383	0.00284138	Body	island	0.463054	0.0121751
162	PDLIM2	cg23696886	0.233867	0.000372716	TSS1500	shore	-0.478877	0.00858626
163	TIAM2	cg24207161	0.446342	3.99065e-08	Body	opensea	-0.441379	0.0173654
164	TIAM2	cg09379340	0.511129	3.16618e-07	Body	opensea	-0.456158	0.0136615
165	TIAM2	cg21707172	0.340597	1.97545e-06	Body	shelf	-0.376355	0.0449956
166	TIAM2	cg03679544	0.246501	0.000310484	Body	shelf	-0.456158	0.0136615
167	TIAM2	cg19614919	0.362595	0.0004376	Body	opensea	-0.397044	0.0338171
168	GALNT14	cg20304857	0.330878	3.77006e-05	Body	opensea	0.408671	0.0277303
169	SLC47A1	cg15971010	0.246876	0.00477989	TSS1500	island	0.46624	0.0107936
170	GPHA2	cg20585500	0.235169	1.1347e-21	5'UTR	opensea	-0.555939	0.00174053
171	GPHA2	cg07537750	0.240565	1.96228e-13	TSS200	opensea	-0.716116	1.25242e-05
172	GPHA2	cg12945194	0.324207	8.47722e-10	1stExon	opensea	-0.427797	0.0206148
173	ADAMTS2	cg03993109	0.264073	0.00370033	Body	island	-0.374677	0.0452241
174	ZCCHC24	cg18605987	0.233494	1.84765e-05	Body	shore	-0.697044	4.24537e-05
175	RAPGEF3	cg06222162	-0.272748	5.27764e-10	Body	opensea	0.415271	0.0259525
176	RHOU	cg12762413	0.237141	0.00154225	Body	shore	-0.403941	0.0306394
177	ALDOC	cg15835620	0.346916	3.31767e-05	5'UTR	opensea	-0.520197	0.00430107
178	ALDOC	cg14501061	0.219416	0.00346251	TSS200	opensea	-0.465517	0.0116785
179	ALDOC	cg14668747	0.237184	0.00634816	TSS200	opensea	-0.458128	0.013222
180	PACS2	cg00808648	0.311574	1.06767e-06	TSS1500	shore	-0.394089	0.0352589
181	F3	cg07387634	0.525091	2.35056e-07	Body	shore	-0.45665	0.0135505
182	F3	cg15026743	0.217615	4.88641e-06	Body	shelf	-0.598522	0.000765552
183	COL11A2	cg23912266	-0.204375	0.00250785	Body	opensea	0.395567	0.0345318
184	RBPMS	cg17181805	0.204113	1.02312e-08	Body	opensea	-0.507389	0.00550826
185	RBPMS	cg04874580	0.263794	1.0763e-08	Body	opensea	-0.51133	0.00510925
186	RBPMS	cg08774902	0.208112	1.6763e-06	Body	opensea	-0.592611	0.000884816
187	RBPMS	cg24586039	0.24893	5.8581e-06	Body	opensea	-0.69064	5.29266e-05
188	RBPMS	cg03633268	0.205657	0.000217645	Body	opensea	-0.371921	0.0477406
189	RBPMS	cg13456241	0.211233	0.00528678	Body	opensea	-0.545813	0.00255211
190	PDGFRL	cg18214661	0.605439	4.98004e-09	Body	opensea	-0.370936	0.0483684
191	DHRS3	cg17468563	0.335547	3.44967e-07	Body	shore	-0.535961	0.00313341
192	DHRS3	cg26029221	0.210201	9.52606e-06	Body	shelf	-0.383744	0.0407043
193	DHRS3	cg23603036	0.232391	0.000778202	Body	shore	-0.691133	5.20457e-05
194	ANGPT1	cg01660999	0.225175	0.00736168	Body	opensea	-0.520197	0.00430107
195	MN1	cg06004017	0.211613	2.79625e-09	Body	shore	-0.480296	0.0090437
196	MYO1C	cg20703671	0.228368	8.26172e-08	TSS200	shore	-0.464039	0.0119744
197	MYO1C	cg09269848	0.234225	2.53502e-05	TSS200	shore	-0.48867	0.00778855
198	MYO1C	cg02317299	0.284753	9.10961e-05	5'UTR	shore	-0.405911	0.0297779
199	CYB561	cg07695566	0.225812	1.35642e-08	TSS1500	shore	-0.430542	0.0205856
200	CYB561	cg22122808	0.401393	5.9286e-06	3'UTR	island	-0.714286	2.28867e-05
201	TEAD3	cg12029281	0.223684	2.89747e-06	5'UTR	shelf	-0.403941	0.0306394
202	TEAD3	cg17568962	0.263736	5.57547e-06	5'UTR	shore	-0.682266	7.00823e-05
203	TEAD3	cg00803638	0.213416	0.000116555	5'UTR	island	-0.465025	0.0117764
204	KIRREL	cg08640619	0.287735	1.32754e-05	Body	opensea	-0.521675	0.00417768
205	COL18A1	cg07964219	0.406093	2.02624e-08	Body	shore	-0.466995	0.0113888
206	COL18A1	cg26852712	0.348198	2.79112e-08	Body	island	-0.736453	9.93642e-06
207	COL18A1	cg14356919	0.293012	1.11806e-06	Body	island	-0.625616	0.000380263
208	COL18A1	cg07279557	0.304289	1.00103e-05	TSS200	shore	-0.539901	0.00288847
209	COL18A1	cg15844419	0.243602	4.61006e-05	Body	island	-0.421675	0.0235762
210	MPP7	cg07268734	-0.27268	0.0029886	5'UTR	opensea	0.415764	0.0257629
211	TNR	cg10331038	-0.205855	0.00361603	5'UTR	opensea	0.378372	0.0429787
212	SCARA3	cg20918219	0.289337	1.33573e-14	Body	shelf	-0.410345	0.0279119
213	SCARA3	cg13351161	0.222472	0.000278883	TSS1500	shore	-0.414778	0.0261432
214	HHIPL1	cg02867079	0.312615	3.70942e-05	TSS1500	island	-0.463358	0.0113585
215	RILP	cg24096415	0.375802	7.73377e-06	TSS200	shore	-0.461633	0.0117082
216	RILP	cg08625564	0.303839	3.27534e-05	TSS200	shore	-0.442665	0.0161858
217	PLXNB1	cg12069042	0.323446	2.74807e-06	5'UTR	shelf	-0.613793	0.000519978
218	PLXNB1	cg21415292	0.200684	0.00849193	5'UTR	shelf	-0.392118	0.0362476
219	SELENBP1	cg24480379	0.282655	1.61721e-07	5'UTR	opensea	-0.539409	0.00291815
220	SELENBP1	cg07680533	0.336153	3.17449e-07	TSS200	opensea	-0.594089	0.000853576
221	SELENBP1	cg24486037	0.258727	7.04924e-07	TSS200	opensea	-0.700493	3.76231e-05
222	COL16A1	cg00160583	0.218922	1.22172e-05	Body	shelf	-0.568966	0.00153912
223	COL16A1	cg09255732	0.226998	0.000729319	TSS1500	shore	-0.380296	0.0426637
224	SALL1	cg08878368	0.336234	8.71044e-09	Body	shore	-0.391819	0.0355467
225	SPARCL1	cg08003102	0.295809	1.77006e-11	TSS1500	opensea	-0.402956	0.0310778
226	SPARCL1	cg12630520	0.229678	2.49272e-05	5'UTR	opensea	-0.563054	0.00175697
227	SMAD6	cg15931471	0.303174	2.39201e-13	Body	opensea	-0.391133	0.0367503
228	SMAD6	cg04093349	0.231247	1.27293e-07	Body	shelf	-0.397537	0.0335815
229	TLE3	cg06730438	-0.451021	3.04627e-06	Body	opensea	0.585714	0.00104416
230	HTATIP2	cg01397325	0.244531	0.000561792	Body	shore	-0.370443	0.0486849
231	NISCH	cg25188828	0.277287	3.82886e-09	Body	shelf	-0.380296	0.0426637
232	DUSP1	cg16957313	0.485797	2.8838e-07	TSS1500	shore	0.368966	0.0496441
233	DUSP1	cg22473727	0.426178	2.36801e-06	TSS1500	shore	0.381281	0.0420963
234	DUSP1	cg09493150	0.313021	0.00214156	TSS1500	island	0.472414	0.0103779
235	MYO7A	cg08879470	0.371718	0.000272378	Body	island	0.447783	0.0156687
236	MYO7A	cg15638292	0.230293	0.000531257	Body	island	-0.3867	0.0390833
237	MYO7A	cg06334307	0.234148	0.00260538	1stExon	opensea	-0.686207	6.14738e-05
238	TLN2	cg19786988	0.397355	5.22857e-08	Body	opensea	-0.526601	0.00378809
239	TLN2	cg13171904	0.385897	0.00013563	Body	opensea	-0.393596	0.0355039
240	AHNAK	cg14789828	0.586686	2.52344e-10	3'UTR	opensea	-0.70197	3.57093e-05
241	AHNAK	cg20518446	0.241829	2.74437e-05	TSS1500	island	-0.618227	0.000463065
242	PLCH2	cg16031338	-0.211957	0.00373622	Body	shelf	0.430542	0.0205856
243	AHNAK	cg26055210	0.414813	4.82021e-05	5'UTR	shelf	-0.428079	0.0213828
244	COL18A1	cg03863756	-0.226694	0.00224245	Body	island	0.457635	0.0133308
245	AHNAK	cg14171514	0.283422	0.000152794	5'UTR	opensea	-0.460591	0.0126895
246	AHNAK	cg19764555	0.313097	0.000210755	TSS1500	shore	-0.472906	0.0102899
247	METRNL	cg08233148	-0.20218	3.80459e-06	Body	island	0.689163	5.56496e-05
248	AHNAK	cg11489918	0.333208	0.00501618	5'UTR	shore	-0.419704	0.0242874
249	AHNAK	cg09183450	0.259586	0.00687997	5'UTR	opensea	-0.403448	0.0308579
250	ITPRIPL2	cg10087036	0.658088	5.04696e-10	1stExon	shelf	-0.533498	0.00329543
251	BCAR3	cg22514229	0.524392	3.46553e-13	Body	opensea	-0.381773	0.0418148
252	KCNH8	cg17078152	0.289412	6.2631e-08	Body	shore	0.471733	0.00978178
253	KCNH8	cg23091302	0.262534	0.00193807	Body	opensea	0.62791	0.000265713
254	DAZAP1	cg22528521	0.242026	0.000502509	Body	island	-0.413793	0.026528
255	EHBP1L1	cg12758867	0.328601	2.90715e-10	Body	shore	-0.59803	0.000774924
256	EHBP1L1	cg16053334	0.384325	8.3985e-06	TSS1500	shore	-0.372906	0.0471193
257	EHBP1L1	cg05837769	0.236931	1.87503e-05	Body	shore	-0.4133	0.0267222
258	EHBP1L1	cg05967487	0.345362	0.000357567	Body	shore	0.37734	0.0444033
259	EHBP1L1	cg14189782	0.210244	0.00365301	TSS1500	island	-0.75665	4.68134e-06
260	DOCK6	cg07515196	0.315623	0.000215696	Body	island	0.419704	0.0242874
261	CDR2L	cg13545874	0.355592	4.67329e-06	Body	shore	-0.3709	0.0476141
262	RAB34	cg05668853	0.221235	2.91485e-05	Body	island	-0.382759	0.0412565
263	RAB34	cg08032476	0.234236	0.000465299	Body	shore	-0.638424	0.000267083
264	USP43	cg22843538	0.290426	2.06599e-12	Body	opensea	0.431034	0.0204292
265	FAM49A	cg10813980	0.5948	1.6042e-10	5'UTR	opensea	-0.499015	0.00644553
266	ACAP3	cg22675767	0.234805	4.91472e-06	Body	opensea	-0.577833	0.00125639
267	ACAP3	cg27185793	0.26316	0.000304741	Body	shelf	-0.559113	0.00191664
268	BST2	cg01254505	0.462871	1.74543e-06	TSS200	opensea	-0.552217	0.00222647
269	BST2	cg12090003	0.24056	5.09738e-06	1stExon	opensea	-0.475862	0.00977501
270	STAT6	cg00500522	0.37357	0.000280869	5'UTR	opensea	-0.555665	0.00206653
271	STAT6	cg25157914	0.237481	0.00601907	TSS1500	opensea	-0.417241	0.0252012
272	NCOR2	cg15249119	0.263755	4.00288e-16	Body	opensea	-0.408374	0.028729
273	NCOR2	cg01400924	0.407785	1.03622e-15	Body	shelf	-0.486207	0.00814128
274	NCOR2	cg08143046	0.403348	2.39354e-11	Body	shore	-0.492118	0.00731663
275	NCOR2	cg15648859	0.250267	1.8617e-10	5'UTR	opensea	-0.440394	0.0176396
276	NCOR2	cg20121920	0.250461	2.41251e-09	Body	shelf	-0.543842	0.00266025
277	NCOR2	cg06242243	0.497606	3.37258e-09	5'UTR	opensea	-0.629557	0.00034165
278	NCOR2	cg10609442	0.320121	3.38317e-09	5'UTR	opensea	-0.589163	0.000961617
279	NCOR2	cg20494738	0.393966	8.51025e-09	5'UTR	opensea	-0.392118	0.0362476
280	NCOR2	cg14847626	0.455287	2.47422e-07	Body	shore	-0.561576	0.00181544
281	NCOR2	cg09644157	0.383946	3.80209e-07	Body	opensea	-0.395567	0.0345318
282	NCOR2	cg05558539	0.20908	4.02921e-07	Body	opensea	-0.404926	0.0302061
283	NCOR2	cg07739604	0.265999	4.84765e-07	Body	shore	-0.48867	0.00778855
284	NCOR2	cg03507593	0.555846	5.53132e-07	Body	shore	-0.544335	0.00263285
285	NCOR2	cg13419087	0.404075	1.07849e-06	Body	opensea	-0.541379	0.00280098
286	NCOR2	cg04403415	0.623778	1.09303e-06	5'UTR	opensea	-0.530049	0.00353437
287	NCOR2	cg08192337	0.256871	1.90777e-06	5'UTR	opensea	-0.374877	0.0458961
288	NCOR2	cg16337430	0.421537	2.13644e-06	Body	shelf	-0.62266	0.00041168
289	NCOR2	cg10996589	0.290925	2.98214e-06	5'UTR	opensea	-0.611823	0.000547176
290	NCOR2	cg22700848	0.469821	4.69121e-06	5'UTR	opensea	-0.545813	0.00255211
291	NCOR2	cg11601197	0.369944	4.89833e-06	Body	shelf	-0.54532	0.00257878
292	NCOR2	cg05395187	0.350704	6.35995e-06	Body	shelf	-0.6867	6.04669e-05
293	SUSD4	cg25743622	-0.453715	0.000109188	Body	opensea	0.395074	0.0347728
294	NCOR2	cg05596926	0.362064	3.16649e-05	Body	shore	-0.538424	0.00297831
295	NCOR2	cg11050793	0.350663	4.87003e-05	Body	shelf	-0.600985	0.000720161
296	NCOR2	cg21052873	0.320749	6.23461e-05	Body	shelf	-0.507882	0.00545697
297	NCOR2	cg01485790	0.241638	0.000151984	Body	island	-0.557635	0.00197968
298	NCOR2	cg13581922	0.31289	0.000602739	Body	shelf	-0.462069	0.0123787
299	NCOR2	cg26641022	0.291772	0.00111587	5'UTR	shore	-0.452217	0.0145773
300	NCOR2	cg22168796	0.271489	0.0011642	Body	shelf	-0.530542	0.00349935
301	NCOR2	cg10082088	0.21913	0.00179251	Body	shore	-0.599507	0.000747104
302	SALL1	cg01679108	-0.225522	0.000217356	Body	opensea	0.448497	0.0146792
303	SNX25	cg22208536	0.382768	3.96798e-05	Body	opensea	-0.512808	0.00496615
304	SNX25	cg12836958	0.274411	0.00348718	5'UTR	shore	-0.524138	0.00397878
305	SNX25	cg09373676	0.200362	0.00506561	Body	opensea	-0.561576	0.00181544
306	CCNJL	cg07184986	0.435708	1.3535e-05	Body	opensea	-0.384729	0.040158
307	EZR	cg06585203	0.460392	4.42838e-06	Body	shore	-0.499015	0.00644553
308	EZR	cg17390562	0.360551	2.63766e-05	Body	shore	-0.635961	0.000286205
309	EZR	cg22871253	0.234996	0.00819035	Body	shore	-0.483251	0.00858242
310	LAYN	cg21703322	0.410454	1.60865e-07	TSS200	island	-0.452217	0.0145773
311	LAYN	cg04226536	0.409911	1.14754e-06	TSS200	island	-0.443842	0.0166955
312	PLEKHH3	cg06654691	0.425825	3.62368e-06	Body	shore	-0.502463	0.0060443
313	PLEKHH3	cg24375399	0.356988	6.11091e-06	Body	shelf	-0.39064	0.0370038
314	PLEKHH3	cg22806907	0.543273	9.69634e-06	Body	shore	-0.489163	0.00771958
315	PLEKHH3	cg03109921	0.418194	1.17247e-05	Body	shore	-0.413793	0.026528
316	CORO1C	cg05679686	0.257374	0.000731559	Body	opensea	-0.554187	0.00213381
317	FAM57A	cg17334389	0.254121	0.00215228	Body	shore	-0.380296	0.0426637
318	NES	cg04234543	0.261061	1.82857e-13	3'UTR	opensea	-0.404433	0.0304221
319	NES	cg12080906	0.202046	1.77471e-06	Body	shore	-0.497537	0.00662433
320	NES	cg06355129	0.329741	2.85553e-06	1stExon	island	-0.436453	0.0187727
321	NES	cg20285128	0.233041	0.00193216	1stExon	island	0.421182	0.0237523
322	DIAPH1	cg04640139	0.243936	0.00865183	Body	shore	-0.429064	0.0210609
323	SALL1	cg04962978	-0.200553	0.00779325	3'UTR	shore	0.381962	0.0408832
324	UBE2E2	cg20222519	0.266135	0.00746528	5'UTR	shore	-0.48867	0.00778855
325	TINAGL1	cg10530055	0.228748	8.48359e-07	TSS1500	opensea	-0.426108	0.0220389
326	TINAGL1	cg15079885	0.25247	1.12221e-05	TSS200	opensea	-0.418227	0.0248323
327	MRC2	cg05651778	0.5041	5.78933e-06	Body	island	-0.417241	0.0252012
328	MRC2	cg11628739	0.292234	5.99801e-06	Body	shore	-0.668966	0.000107582
329	IER3	cg03124636	0.468069	2.74673e-10	3'UTR	island	-0.59064	0.000928019
330	IER3	cg10047572	0.213084	2.71061e-05	3'UTR	island	-0.522167	0.00413723
331	IER3	cg20178172	0.228205	0.00054742	3'UTR	island	-0.444828	0.0164337
332	IER3	cg08384314	0.269769	0.000561139	3'UTR	island	-0.399507	0.0326527
333	A4GALT	cg00241712	0.441711	5.03739e-06	5'UTR	shore	-0.444335	0.0165642
334	CALD1	cg07625383	0.333372	0.000138255	Body	opensea	-0.450246	0.0150542
335	CPXM2	cg05906144	-0.340446	8.64056e-05	Body	opensea	0.438225	0.017417
336	ITGA11	cg05377733	0.290786	0.000987938	Body	opensea	0.41603	0.0247874
337	SMAD3	cg00445232	0.469774	1.30849e-13	Body	opensea	-0.369951	0.0490029
338	SMAD3	cg03352169	0.372418	3.11157e-08	Body	opensea	-0.595074	0.000833287
339	SMAD3	cg05438378	0.456552	1.02566e-07	Body	opensea	-0.473892	0.0101158
340	SMAD3	cg26430287	0.326711	3.78018e-07	Body	opensea	-0.378818	0.0435265
341	SMAD3	cg03480935	0.295233	4.54078e-05	TSS200	opensea	-0.457635	0.0133308
342	PTPRU	cg01115565	0.303155	3.86828e-07	Body	shore	-0.401478	0.0317449
343	PTPRU	cg17670650	0.276239	9.57193e-05	Body	island	-0.551724	0.00225018
344	CRISPLD2	cg09967633	0.451346	6.58948e-08	Body	opensea	-0.624631	0.000390493
345	CRISPLD2	cg01704698	0.30773	5.5926e-07	3'UTR	opensea	-0.557143	0.00200109
346	CRISPLD2	cg03296797	0.205729	0.000170655	5'UTR	opensea	-0.550739	0.00229824
347	CD248	cg18935353	0.259599	4.63214e-06	TSS1500	shore	-0.578818	0.00122796
348	CD248	cg05496363	0.201507	2.07101e-05	1stExon	island	-0.417241	0.0252012
349	CD248	cg13860849	0.221451	8.46257e-05	1stExon	island	-0.683251	6.78353e-05
350	KCNIP3	cg22588640	0.280344	0.00328188	1stExon	opensea	-0.393645	0.0346227
351	SCUBE3	cg11562411	0.358633	3.40677e-07	Body	opensea	-0.396059	0.0342922
352	SCUBE3	cg17510121	0.498539	9.53764e-06	Body	shore	-0.553202	0.00217972
353	INF2	cg03573445	0.325744	3.477e-10	TSS1500	shore	-0.570443	0.00148848
354	INF2	cg07155724	0.23033	1.14655e-05	5'UTR	shore	-0.509852	0.00525587
355	FAM167A	cg26274995	0.389832	1.43336e-09	5'UTR	opensea	0.438916	0.0180576
356	FAM167A	cg02771117	0.291671	1.00765e-06	3'UTR	opensea	0.48867	0.00778855
357	CPXM2	cg12769705	-0.392342	1.39057e-05	Body	opensea	0.496178	0.00619036
358	KIAA0513	cg04016660	0.272069	1.03409e-07	5'UTR	opensea	-0.395567	0.0345318
359	MBOAT1	cg21119074	0.274079	3.14278e-05	Body	shore	-0.436453	0.0187727
360	KCNJ5	cg10333023	0.236255	2.25457e-07	5'UTR	opensea	-0.433498	0.0196618
361	SLC2A9	cg08649013	-0.287506	0.00118204	TSS1500	opensea	0.440695	0.016723
362	PAX6	cg08116462	0.296238	6.109e-05	Body	shore	0.459909	0.0120669
363	PAX6	cg09217215	0.25404	0.000950337	5'UTR	shore	0.388471	0.037292
364	PAX6	cg22982368	0.279775	0.00108786	Body	island	0.404976	0.0293117
365	SFMBT2	cg26922690	-0.352102	0.000774048	Body	island	0.558621	0.00193746
366	INF2	cg05018513	-0.206261	1.66534e-05	Body	opensea	0.429557	0.0209015
367	ADCY9	cg03945800	0.380976	9.00624e-06	5'UTR	island	-0.446798	0.0159203
368	CSF1	cg19755069	0.283424	4.91126e-08	3'UTR	opensea	-0.526601	0.00378809
369	DOCK1	cg03458096	-0.447879	1.01475e-07	Body	opensea	0.566995	0.00160897
370	PTCH1	cg13754720	0.321834	7.05954e-10	Body	shore	-0.382759	0.0412565
371	PTCH1	cg13974838	0.291944	0.00305207	Body	opensea	-0.514286	0.0048265
372	WDR81	cg15839421	0.244345	3.32197e-05	Body	shore	-0.406404	0.0295656
373	C6orf47	cg20774166	0.248314	0.00193092	1stExon	shore	-0.417734	0.0250162
374	FBXL8	cg16575094	0.281618	2.84254e-09	Body	island	-0.568473	0.00155633
375	GPR124	cg03171419	0.265219	1.87422e-08	3'UTR	shore	-0.69064	5.29266e-05
376	GPR124	cg24910112	0.310659	3.45337e-06	Body	shore	-0.466995	0.0113888
377	GPR124	cg07118000	0.237036	0.00073833	Body	shore	-0.56601	0.00164491
378	DOCK1	cg05702161	-0.537614	3.90462e-07	Body	opensea	0.541379	0.00280098
379	SAMD11	cg09756115	0.249254	0.000417021	Body	shore	-0.46601	0.0115812
380	SAMD11	cg15742605	0.201137	0.00318855	Body	shore	-0.405419	0.0299914
381	RASGRP2	cg01753544	0.225235	1.92597e-05	Body	island	-0.404433	0.0304221
382	METRN	cg06320418	0.259347	0.00050378	Body	shore	-0.434975	0.0192129
383	TGFBI	cg21550219	0.420954	1.28682e-08	Body	opensea	-0.546305	0.00252568
384	TGFBI	cg10648763	0.244576	0.0015595	TSS200	shore	-0.553695	0.00215666
385	OPLAH	cg00774999	0.28723	8.91689e-05	TSS1500	shore	-0.406659	0.0285827
386	MYOF	cg04887082	0.285144	0.000522059	Body	opensea	0.407882	0.0289363
387	DOCK1	cg17689490	-0.443333	1.10773e-06	Body	opensea	0.530542	0.00349935
388	MYOF	cg18082515	0.231016	0.00227705	Body	opensea	-0.466502	0.0114847
389	LRP5	cg21894914	0.33702	4.53636e-05	Body	opensea	0.38867	0.038032
390	CDK2AP1	cg14844236	0.210766	2.05609e-05	Body	shore	-0.581773	0.001146
391	CDK2AP1	cg10502957	0.316372	0.000210781	TSS1500	shore	-0.412315	0.027114
392	CDK2AP1	cg07729842	0.323554	0.000358196	TSS1500	shore	-0.368966	0.0496441
393	CDK2AP1	cg08696931	0.297328	0.000456819	Body	island	-0.403941	0.0306394
394	CDK2AP1	cg25630910	0.303352	0.000638905	Body	shore	-0.540394	0.00285905
395	KRT8	cg01835489	0.299892	0.00012926	TSS1500	shore	-0.405911	0.0297779
396	KRT8	cg20324165	0.211131	0.00510977	TSS1500	shore	-0.56601	0.00164491
397	TBC1D8	cg10523140	0.224187	6.92709e-05	TSS1500	shore	-0.564039	0.0017189
398	ZSWIM6	cg14742809	0.486564	8.28671e-09	Body	shore	-0.478818	0.00928213
399	RHOF	cg03302951	0.210855	0.000383943	Body	island	-0.56066	0.00155854
400	DOCK1	cg14995235	-0.309447	1.87956e-06	Body	opensea	0.643842	0.000228913
401	HEATR2	cg01058266	0.241111	3.71351e-17	Body	shelf	0.463547	0.0120744
402	HEATR2	cg27384070	0.240643	4.7222e-11	Body	shore	0.557635	0.00197968
403	FRMD6	cg09841842	0.389916	9.72854e-07	5'UTR	opensea	-0.407882	0.0289363
404	FRMD6	cg11777870	0.246234	1.46267e-06	Body	opensea	-0.5	0.00632864
405	RAB40C	cg07186472	0.444643	7.89757e-19	Body	shore	-0.375369	0.0455944
406	RAB40C	cg01770948	0.453126	1.16635e-08	Body	shore	-0.497537	0.00662433
407	AMOTL1	cg16943185	0.545151	7.81737e-08	Body	shore	-0.71133	2.55045e-05
408	AMOTL1	cg03259212	0.302347	1.99402e-05	3'UTR	opensea	-0.542365	0.00274394
409	AMOTL1	cg05130679	0.509295	6.02637e-05	Body	shore	-0.7	3.82814e-05
410	AMOTL1	cg01872024	0.399064	0.000140158	Body	shore	-0.500985	0.00621356
411	AMOTL1	cg14134256	0.257567	0.00779695	Body	shore	-0.418719	0.0246495
412	DOCK1	cg05788176	-0.277016	0.000220107	Body	opensea	0.65468	0.000166659
413	DOCK1	cg13434852	-0.369359	0.000260101	Body	opensea	0.378818	0.0435265
414	FOXK1	cg17760049	0.39352	3.46528e-17	Body	opensea	-0.4	0.0324238
415	FOXK1	cg05237718	0.302984	1.77438e-16	3'UTR	shore	-0.39064	0.0370038
416	FOXK1	cg11516540	0.390525	9.00808e-12	Body	opensea	-0.591133	0.000917049
417	FOXK1	cg13589218	0.365231	1.21012e-08	Body	shore	-0.381281	0.0420963
418	FOXK1	cg19336198	0.325487	1.8953e-08	Body	opensea	-0.376355	0.0449956
419	FOXK1	cg03461110	0.248783	0.00837393	Body	opensea	-0.456158	0.0136615
420	KANK2	cg17683336	0.425275	1.09638e-07	5'UTR	shore	-0.596552	0.000803643
421	KANK2	cg07888912	0.333212	2.44523e-06	5'UTR	shore	-0.516256	0.00464556
422	FRMD8	cg06039988	0.27921	5.38959e-07	Body	shelf	-0.443842	0.0166955
423	AEBP1	cg01399219	0.595453	4.52376e-08	Body	opensea	-0.496059	0.00680735
424	AEBP1	cg10873171	0.284534	8.90134e-07	Body	opensea	-0.630049	0.000337074
425	TRIM27	cg12896170	0.318852	3.82569e-09	Body	shore	-0.384729	0.040158
426	SLA	cg06772221	0.323585	1.93941e-05	Body	opensea	-0.370936	0.0483684
427	DUSP5	cg20925954	0.315492	0.000207691	TSS1500	shore	-0.37931	0.0432374
428	SLC12A4	cg02564259	0.384582	1.2806e-12	3'UTR	opensea	-0.509852	0.00525587
429	SLC12A4	cg09581611	0.417743	9.03161e-11	3'UTR	opensea	-0.375369	0.0455944
430	SLC12A4	cg08958168	0.465326	2.82282e-10	Body	shore	-0.75665	4.68134e-06
431	SLC12A4	cg06839111	0.380622	9.10227e-09	3'UTR	opensea	-0.513793	0.00487267
432	SLC12A4	cg09495207	0.391636	2.23136e-07	3'UTR	opensea	-0.484729	0.00835938
433	SLC12A4	cg05261851	0.28197	6.89761e-07	Body	shore	-0.735961	1.01246e-05
434	SLC12A4	cg01817009	0.250614	7.23824e-07	3'UTR	opensea	-0.755665	4.84891e-06
435	LGALS1	cg01264106	0.412573	1.9384e-05	TSS200	shore	-0.438424	0.0181988
436	LGALS1	cg07219769	0.286634	0.000120544	TSS200	shore	-0.44532	0.0163041
437	LGALS1	cg27619353	0.237462	0.000510926	1stExon	shore	-0.568966	0.00153912
438	LGALS1	cg19853760	0.212071	0.00161794	1stExon	shore	-0.725123	1.52782e-05
439	CPT1A	cg17058475	0.537497	3.83065e-07	5'UTR	shore	-0.440887	0.017502
440	CPT1A	cg01082498	0.553307	2.37273e-06	5'UTR	island	-0.585222	0.00105645
441	RING1	cg16070279	0.216263	1.82905e-05	Body	shore	-0.484729	0.00835938
442	B4GALT1	cg05779272	0.226517	1.98658e-06	TSS1500	shore	-0.675369	8.77518e-05
443	LRIG1	cg05543520	0.293992	5.53164e-05	Body	opensea	-0.46798	0.011199
444	PARK2	cg16210324	0.259584	1.05246e-05	Body	opensea	-0.408374	0.028729
445	RPH3AL	cg05231332	0.334747	1.35226e-09	Body	island	-0.472414	0.0103779
446	RPH3AL	cg05590233	0.346956	1.27272e-08	Body	opensea	-0.4	0.0324238
447	RHOD	cg08221781	-0.341087	9.51728e-05	TSS1500	shore	-0.399015	0.0328829
448	RPH3AL	cg18771195	0.249466	7.10476e-06	5'UTR	shelf	-0.562069	0.00179576
449	ARHGAP10	cg05573550	-0.317538	0.00013402	Body	opensea	0.575862	0.00131497
450	RPH3AL	cg18290190	0.232569	2.66012e-05	Body	island	-0.458621	0.013114
451	RPH3AL	cg07828377	0.283226	4.13912e-05	Body	opensea	-0.469951	0.0108276
452	RPH3AL	cg21909751	0.201728	7.50583e-05	Body	island	-0.431034	0.0204292
453	RPH3AL	cg12887033	0.272941	0.000118114	Body	shelf	-0.418227	0.0248323
454	RPH3AL	cg17316718	0.297999	0.000922125	Body	island	-0.603941	0.000668807
455	RPH3AL	cg21553980	0.327846	0.00105311	Body	opensea	-0.53399	0.00326246
456	RPH3AL	cg17193961	0.279269	0.00117345	Body	island	-0.522167	0.00413723
457	RPH3AL	cg26730036	0.294454	0.00122727	Body	shore	-0.602956	0.000685558
458	RPH3AL	cg06755596	0.282291	0.00125785	Body	island	-0.460099	0.0127945
459	SLC9A3R2	cg09321109	0.301074	1.40631e-18	Body	shore	-0.379803	0.0429498
460	B4GALT2	cg17170190	0.216209	2.63999e-05	5'UTR	shore	-0.399015	0.0328829
461	F10	cg14904725	0.307197	0.000126016	TSS200	opensea	-0.42069	0.0239296
462	F10	cg13001878	0.257707	0.000216816	TSS200	opensea	-0.518719	0.00442759
463	SLC39A7	cg08133228	-0.264446	2.45916e-05	Body	shore	-0.457635	0.0133308
464	NID1	cg23028178	0.2103	0.0026906	TSS1500	shore	-0.504433	0.00582476
465	SLC39A7	cg24996709	-0.266421	0.000508717	Body	shore	-0.496059	0.00680735
466	TRIP6	cg19566658	0.21294	7.91599e-06	Body	shelf	-0.657143	0.000154793
467	WWC1	cg08568649	0.275696	8.40547e-07	Body	shelf	-0.453695	0.014228
468	FOXO1	cg09000385	0.373122	3.82884e-05	Body	opensea	0.697044	4.24537e-05
469	TTC22	cg02935904	0.266246	1.79342e-05	TSS1500	shore	-0.575933	0.00107799
470	MINK1	cg18015026	0.351531	4.58494e-05	Body	opensea	-0.445813	0.0161753
471	HDAC4	cg15106082	0.276063	4.70514e-15	Body	opensea	-0.388177	0.0382926
472	HDAC4	cg22101174	0.471842	4.40453e-09	Body	opensea	-0.417734	0.0250162
473	HDAC4	cg25521439	0.249967	5.89416e-08	Body	shore	-0.517734	0.0045137
474	HDAC4	cg16360836	0.270853	1.19923e-07	Body	opensea	-0.561084	0.0018353
475	HDAC4	cg15978561	0.391558	1.35689e-07	Body	island	-0.396552	0.034054
476	HDAC4	cg05114739	0.416302	2.26139e-07	Body	opensea	-0.401478	0.0317449
477	HDAC4	cg20298668	0.39267	0.000101354	Body	opensea	-0.484729	0.00835938
478	IL4R	cg16649560	0.266991	1.12946e-06	5'UTR	opensea	-0.69064	5.29266e-05
479	SLC15A3	cg26980692	0.223621	0.00185264	TSS1500	shore	-0.381773	0.0418148
480	ETS2	cg00168694	0.309642	1.2078e-09	Body	shore	-0.594581	0.000843378
481	GRASP	cg19374752	0.284874	2.68374e-07	Body	shelf	-0.550068	0.00199229
482	GRASP	cg06611426	0.283958	6.11546e-07	Body	shelf	-0.481094	0.00824127
483	TADA2B	cg10004897	0.246243	5.02166e-05	Body	shore	0.418719	0.0246495
484	PRKCH	cg19512969	0.210151	4.78653e-05	Body	opensea	-0.466995	0.0113888
485	PRKCH	cg20457147	0.348209	0.00102577	TSS1500	shore	-0.532512	0.00336223
486	IGFBP4	cg03635766	0.45039	3.64599e-09	Body	opensea	-0.391626	0.0364982
487	IGFBP4	cg17980404	0.295463	4.76752e-05	Body	shore	-0.428571	0.0212214
488	FOXL2	cg11293699	0.344388	0.00595774	TSS1500	shore	-0.831034	1.14238e-06
489	ECM1	cg01076495	0.382939	1.72851e-07	1stExon	opensea	-0.440394	0.0176396
490	ECM1	cg03818307	0.277545	2.49353e-07	1stExon	opensea	-0.64335	0.000232173
491	EIF2AK4	cg05304366	0.273289	7.59112e-05	Body	shore	-0.489163	0.00771958
492	DAP	cg18801045	0.396246	3.28071e-06	Body	opensea	-0.436453	0.0187727
493	ZBTB46	cg05751343	0.221566	1.41862e-06	Body	shore	-0.448768	0.0154204
494	PTPRG	cg11934688	0.290318	2.24427e-08	Body	opensea	0.378325	0.0438172
495	PTPRG	cg20559405	0.508309	8.98893e-07	Body	opensea	0.431034	0.0204292
496	PTPRG	cg00974944	0.258973	3.47975e-06	Body	opensea	0.485222	0.00828613
497	IL4R	cg08317580	-0.426767	0.000222886	5'UTR	opensea	0.506897	0.00555996
498	PTPRG	cg03601516	0.23367	0.000260096	Body	shore	0.551232	0.0022741
499	RRAD	cg06410849	0.211772	1.10655e-09	Body	island	-0.459832	0.012083
500	RRAD	cg05544396	0.361537	1.9958e-07	TSS1500	shore	-0.579596	0.000984127
501	RRAD	cg00913604	0.381928	2.17336e-06	Body	shore	-0.496304	0.00617528
502	RRAD	cg01266287	0.213801	3.44367e-05	TSS1500	shore	-0.814687	7.4902e-08
503	RRAD	cg19428417	0.236237	0.00214686	TSS1500	shore	-0.767373	1.19163e-06
504	KLF9	cg00049440	0.358243	0.000801013	Body	shore	-0.656158	0.000159447
505	FXYD6	cg03821689	0.357749	0.00131201	TSS1500	shore	-0.739901	8.7146e-06
506	FXYD6	cg09608949	0.321942	0.00161788	TSS1500	shore	-0.687685	5.84971e-05
507	FXYD6	cg15101392	0.324407	0.00813966	TSS1500	shore	-0.72266	1.67622e-05
508	PTPRG	cg08091771	-0.217077	0.000247156	Body	opensea	0.573399	0.00139152
509	FXYD6	cg09193791	0.323177	0.000337333	5'UTR	opensea	-0.389163	0.0377728
510	STK19	cg09230350	0.270974	8.97218e-07	TSS1500	shelf	-0.485222	0.00828613
511	CDH11	cg01602001	0.355378	0.000167027	5'UTR	opensea	-0.62069	0.000433866
512	CDH11	cg04977618	0.455774	1.47092e-12	5'UTR	opensea	-0.700493	3.76231e-05
513	ITGBL1	cg10243348	0.391552	7.29692e-09	1stExon	shore	-0.700493	3.76231e-05
514	ITGBL1	cg15209376	0.43428	3.49898e-16	1stExon	shore	-0.559606	0.00189602
515	PTPRG	cg16196857	-0.285879	0.00384789	Body	opensea	0.62266	0.00041168
516	ITGBL1	cg16293118	0.470806	3.74871e-11	1stExon	shore	-0.503941	0.00587899
517	ITGBL1	cg22070156	0.516065	2.81034e-12	1stExon	shore	-0.664532	0.000123536
518	ITGBL1	cg03386869	0.393067	1.28237e-14	TSS200	shore	-0.499507	0.00638686
519	ITGBL1	cg05138203	0.210079	1.92232e-10	TSS1500	shore	-0.418227	0.0248323
520	ITGBL1	cg21116266	0.473998	3.20409e-09	1stExon	shore	-0.405419	0.0299914
521	PTPRG	cg07663722	-0.296102	0.00482525	Body	opensea	0.644335	0.000225693
522	ITGBL1	cg22909609	0.261154	0.00772497	Body	shore	-0.372414	0.0474291
523	APBA2	cg14794445	-0.230808	0.00114859	Body	shore	0.47124	0.00986914
524	IFI27	cg10778971	0.294727	4.04001e-08	5'UTR	opensea	-0.436946	0.0186278
525	TAGLN	cg10130564	0.317584	5.75417e-07	TSS200	opensea	-0.582266	0.00113282
526	TAGLN	cg11861562	0.352632	8.52521e-08	TSS1500	opensea	-0.511823	0.00506116
527	TAGLN	cg12051762	0.383841	8.29823e-08	TSS1500	opensea	-0.518227	0.00447046
528	TAGLN	cg15534755	0.23316	2.39551e-05	TSS200	opensea	-0.557635	0.00197968
529	TAGLN	cg16524733	0.413403	1.974e-05	5'UTR	opensea	-0.456158	0.0136615
530	TAGLN	cg26566898	0.311721	2.20641e-06	TSS200	opensea	-0.453695	0.014228
531	FAS	cg26478401	0.202999	1.93328e-07	TSS1500	shore	-0.528571	0.00364125
532	APBA2	cg19847577	0.252841	0.000112943	TSS200	opensea	0.464589	0.0111141
533	TYRO3	cg24374636	0.355767	3.10661e-12	Body	shore	-0.459113	0.0130068
534	TYRO3	cg17082634	0.389101	1.95347e-07	TSS1500	shore	-0.428571	0.0212214
535	TYRO3	cg07866131	0.564988	4.64929e-07	TSS1500	shore	-0.371429	0.0480537
536	TNFAIP8L1	cg11654922	0.33149	6.05241e-06	TSS200	shore	-0.411823	0.0273117
537	TNS1	cg20751706	0.223899	9.97921e-10	5'UTR	opensea	-0.550246	0.0023226
538	TNS1	cg20697464	0.222288	3.51617e-08	5'UTR	opensea	-0.664039	0.000125431
539	TNS1	cg06466796	0.215535	1.05576e-05	Body	opensea	-0.644828	0.000222513
540	NFIX	cg02297936	-0.26504	1.82941e-05	3'UTR	island	0.469458	0.0109194
541	TNS1	cg02057716	0.285281	1.51218e-05	5'UTR	opensea	-0.607389	0.000612962
542	TNS1	cg23830185	0.324949	3.00397e-05	5'UTR	opensea	-0.458621	0.013114
543	MRPL23	cg01530482	0.235117	0.000208159	Body	shore	-0.507882	0.00545697
544	LAMA5	cg15782228	0.420089	5.66419e-07	Body	opensea	-0.499507	0.00638686
545	PBX4	cg03031726	0.395606	4.74402e-16	3'UTR	opensea	0.52642	0.0033517
546	MXD4	cg03840289	0.319089	1.74473e-06	Body	shore	-0.412315	0.027114
547	MXD4	cg08459783	0.24566	0.000136018	Body	shelf	-0.39064	0.0370038
548	ARHGAP27	cg14154330	0.237569	0.000434495	TSS1500	shelf	-0.454187	0.0141132
549	NT5C2	cg20613259	0.301647	7.37343e-05	Body	opensea	-0.484729	0.00835938
550	TNS3	cg22379472	0.24571	7.39648e-10	Body	opensea	-0.538916	0.0029481
551	TNS3	cg07241084	0.364393	1.79273e-06	5'UTR	opensea	-0.468473	0.0111052
552	SCUBE2	cg19237879	0.317982	0.000705473	TSS1500	island	-0.51788	0.00400826
553	KCTD16	cg18991165	0.217787	0.00182678	Body	opensea	-0.405126	0.0292462
554	KCTD16	cg24193140	0.37673	0.000328011	5'UTR	shelf	-0.446033	0.015301
555	NFIX	cg05356319	-0.298678	1.14455e-06	Body	island	0.399015	0.0328829
556	SH3PXD2B	cg19979108	0.593541	8.21784e-12	Body	opensea	-0.472906	0.0102899
557	SH3PXD2B	cg01753263	0.324747	2.19503e-05	Body	shore	-0.548768	0.00239703
558	SH3PXD2B	cg15678744	0.258708	0.000104321	Body	opensea	-0.478818	0.00928213
559	NFIX	cg06623219	-0.402258	0.000102912	3'UTR	island	0.505911	0.00566462
560	PYROXD2	cg03852570	0.238524	0.00670392	TSS200	opensea	-0.453202	0.0143437
561	VARS2	cg14935711	0.20679	0.00582978	Body	shore	-0.403941	0.0306394
562	PHLPP1	cg13381110	0.223772	0.00157698	Body	opensea	-0.451724	0.0146954
563	ASS1	cg13835114	0.303528	0.000739852	5'UTR	opensea	-0.45665	0.0135505
564	ASS1	cg11045524	0.216098	0.00204239	5'UTR	island	-0.374384	0.0461995
565	TGFBR3	cg17080882	0.537976	1.08996e-07	Body	opensea	-0.566995	0.00160897
566	TGFBR3	cg21382567	0.216614	7.05767e-06	Body	opensea	0.383251	0.0409797
567	RFTN1	cg10502118	0.331457	6.61526e-05	5'UTR	shore	-0.47931	0.00920207
568	RRBP1	cg05955436	0.562119	4.0216e-08	5'UTR	shore	-0.431527	0.0202738
569	RRBP1	cg02451508	0.263435	3.28097e-07	Body	island	-0.659606	0.000143678
570	RRBP1	cg13177873	0.411963	1.71471e-05	5'UTR	island	-0.641872	0.000242199
571	RARG	cg10592478	0.209112	3.22989e-07	Body	shore	-0.774877	2.60336e-06
572	NFIX	cg07788061	-0.20215	2.28162e-05	3'UTR	shore	0.377833	0.0441094
573	RARG	cg20059012	0.360273	3.97069e-06	Body	shore	-0.730542	1.24435e-05
574	RARG	cg13327134	0.334976	6.14386e-06	Body	shelf	-0.437438	0.0184839
575	RARG	cg09365924	0.266053	2.4965e-05	Body	shelf	-0.533005	0.00332868
576	RARG	cg13940444	0.335987	0.0012295	Body	shelf	-0.428079	0.0213828
577	FAM65B	cg22129220	0.362093	1.18887e-12	5'UTR	shore	-0.476847	0.00960831
578	FAM65B	cg23827488	0.495543	1.40353e-06	5'UTR	shelf	-0.376847	0.0446987
579	FAM65B	cg24960799	0.528517	4.49649e-06	5'UTR	shore	-0.516749	0.00460124
580	NFIX	cg10767662	-0.280713	0.000408228	Body	shelf	0.417241	0.0252012
581	FAM65B	cg25419523	0.288413	0.000120322	5'UTR	opensea	0.383251	0.0409797
582	ZDHHC14	cg17622855	0.267896	2.49611e-10	Body	opensea	0.421182	0.0237523
583	TMEM184A	cg09329079	0.357524	4.69822e-06	3'UTR	shore	-0.603941	0.000668807
584	TMEM184A	cg18294109	0.332659	8.02893e-09	3'UTR	shore	-0.439901	0.017778
585	PLEKHG2	cg01595505	0.200797	2.0109e-06	Body	shore	-0.561576	0.00181544
586	NFIX	cg18299835	-0.293468	2.74061e-05	3'UTR	island	0.374877	0.0458961
587	GSN	cg17071957	0.397057	1.11802e-06	TSS1500	opensea	-0.55468	0.00211118
588	GSN	cg14478589	0.213795	7.90415e-07	Body	opensea	-0.368966	0.0496441
589	WWTR1	cg15043384	0.325828	8.50076e-07	Body	island	-0.587192	0.00100806
590	WWTR1	cg11050612	0.362894	4.7068e-06	Body	shore	-0.656158	0.000159447
591	WWTR1	cg14557185	0.3882	1.2828e-05	Body	island	-0.581281	0.00115932
592	WWTR1	cg23017915	0.214058	5.33604e-05	Body	shore	-0.735961	1.01246e-05
593	FKBP10	cg23796525	0.245663	5.44755e-05	3'UTR	opensea	-0.675369	8.77518e-05
594	MARVELD1	cg24500959	0.605044	1.34102e-09	Body	shore	-0.388177	0.0382926
595	IFITM3	cg17990365	0.270804	5.72729e-05	3'UTR	shore	-0.517734	0.0045137
596	MSI2	cg21139312	0.273542	5.72474e-13	Body	opensea	-0.463547	0.0120744
597	MSI2	cg05347965	0.336099	5.76801e-11	Body	opensea	-0.559606	0.00189602
598	MSI2	cg08322234	0.246111	5.86085e-11	Body	opensea	-0.53202	0.00339607
599	MSI2	cg13654836	0.514102	4.67005e-10	Body	opensea	-0.610345	0.000568383
600	MSI2	cg22149471	0.264839	7.01067e-08	Body	opensea	-0.415764	0.0257629
601	MSI2	cg22233512	0.423253	1.05855e-06	Body	opensea	-0.570936	0.00147192
602	MSI2	cg19810715	0.32874	2.26894e-05	Body	opensea	-0.663547	0.000127352
603	MSI2	cg04486382	0.304428	4.31674e-05	Body	opensea	-0.638424	0.000267083
604	MSI2	cg20070852	0.320437	0.000104306	Body	opensea	-0.419704	0.0242874
605	MSI2	cg05184882	0.235412	0.000315733	Body	opensea	-0.498584	0.00590722
606	CNTNAP3	cg20694241	-0.246338	0.00279453	Body	shore	0.666585	7.8744e-05
607	MSI2	cg06966839	0.235807	0.000957148	Body	opensea	-0.615271	0.000500363
608	MSI2	cg22430861	0.310209	0.00243749	Body	opensea	-0.508867	0.00535561
609	MSI2	cg23586172	0.248321	0.00680841	Body	opensea	-0.72266	1.67622e-05
610	CAPSL	cg09142144	0.202271	0.000633771	TSS1500	opensea	-0.465517	0.0116785
611	TTYH3	cg13676996	0.281684	1.13961e-05	3'UTR	shore	-0.370443	0.0486849
612	HDAC5	cg08531489	0.213337	0.000177004	Body	opensea	-0.402463	0.0312989
613	IFITM1	cg09026253	0.266026	2.02322e-13	TSS1500	shore	-0.536946	0.00307055
614	IFITM1	cg21686213	0.269826	1.22077e-08	3'UTR	shore	-0.650246	0.000190046
615	IFITM1	cg08275025	0.345703	7.06232e-08	Body	shore	-0.579803	0.00120009
616	IFITM1	cg01971407	0.280361	1.27932e-07	TSS1500	shelf	-0.637438	0.000274593
617	IFITM1	cg03038262	0.339273	1.37721e-07	3'UTR	shore	-0.674384	9.05742e-05
618	IFITM1	cg14967066	0.229966	1.16589e-06	1stExon	shore	-0.604433	0.000660567
619	TGFBR3	cg11855117	-0.263985	0.00111983	Body	opensea	0.457635	0.0133308
620	IFITM1	cg10552523	0.283944	4.18844e-06	TSS1500	shelf	-0.470443	0.0107363
621	CYBA	cg27176614	0.298426	3.08573e-07	TSS1500	shore	-0.405911	0.0297779
622	SNF8	cg26043567	0.227099	9.84627e-08	3'UTR	opensea	-0.433005	0.0198133
623	CHD5	cg24886710	0.532614	4.15641e-15	Body	opensea	-0.557143	0.00200109
624	CHD5	cg25143235	0.422667	1.19722e-05	Body	island	-0.417241	0.0252012
625	CHD5	cg15578645	0.242394	0.00582093	Body	shore	-0.444828	0.0164337
626	PRSS23	cg25851751	0.344865	2.55766e-10	5'UTR	shelf	-0.559429	0.00160435
627	TNFAIP2	cg08301307	0.209293	1.70691e-06	Body	opensea	-0.686207	6.14738e-05
628	SPR	cg19889780	0.259972	0.00146336	TSS1500	shore	-0.378818	0.0435265
629	BAG3	cg08756008	0.32479	1.1548e-06	Body	opensea	-0.425123	0.0223731
630	BAG3	cg17076667	0.380012	0.000726939	Body	opensea	-0.673399	9.34767e-05
631	BAG3	cg10673740	0.376436	0.00144073	Body	island	-0.600493	0.000729046
632	ERN1	cg20998539	0.34525	1.17294e-10	TSS1500	shore	-0.495567	0.00686931
633	ERN1	cg14603886	0.436766	1.38224e-06	Body	shore	-0.478325	0.00936278
634	RBMS2	cg11002709	0.204972	0.000181836	Body	opensea	-0.369951	0.0490029
635	SLC45A1	cg11189357	0.337833	2.49464e-07	Body	shore	-0.414778	0.0261432
636	POR	cg18921306	0.40951	3.59703e-05	Body	opensea	-0.562562	0.00177627
637	POR	cg14204559	0.387	3.62929e-05	Body	opensea	-0.562562	0.00177627
638	POR	cg27342333	0.275403	0.0032323	Body	opensea	-0.465517	0.0116785
639	POR	cg15177211	0.329276	0.0084021	5'UTR	opensea	-0.441379	0.0173654
640	NFIA	cg16001865	0.216883	0.00095334	Body	opensea	-0.548276	0.0024223
641	NFIA	cg12126901	0.294226	0.00116967	Body	opensea	-0.509852	0.00525587
642	NFIA	cg18946602	0.331279	0.00167721	Body	shore	-0.425616	0.0222055
643	NFIA	cg09062708	0.418041	0.0047663	Body	opensea	-0.709852	2.69142e-05
644	KCTD15	cg04566826	0.206565	1.80119e-07	5'UTR	shore	-0.402463	0.0312989
645	EPN2	cg14173476	0.389361	3.59976e-14	5'UTR	opensea	0.368966	0.0496441
646	EPN2	cg17742418	0.222495	0.00332852	5'UTR	opensea	0.501478	0.00615669
647	SLC1A1	cg21156276	0.200263	3.52314e-05	Body	shore	-0.370936	0.0483684
648	MDFIC	cg24115681	-0.307191	0.00111441	Body	shelf	0.369951	0.0490029
649	FAM150B	cg25710298	0.263654	0.00112886	Body	shore	0.444554	0.0156844
650	DIO2	cg13033972	0.2432	0.000244135	TSS1500	opensea	0.46798	0.011199
651	S100A4	cg26894575	0.2378	8.89594e-06	5'UTR	opensea	-0.592611	0.000884816
652	GDPD5	cg02602489	0.217624	5.99271e-06	Body	opensea	0.380788	0.0423792
653	GNAS	cg00940140	0.310169	0.00038787	Body	opensea	-0.697044	4.24537e-05
654	MTA1	cg18182566	0.225309	9.44068e-08	Body	opensea	-0.41133	0.0275106
655	SLC25A33	cg23824902	-0.280574	0.00524335	Body	opensea	-0.451232	0.0148142
656	PLEKHG4B	cg15195910	-0.285151	0.001178	TSS200	opensea	0.428783	0.0202933
657	TRPS1	cg03344332	0.334878	1.42414e-14	Body	opensea	0.373399	0.046811
658	MTOR	cg11750962	0.26921	0.00215252	Body	opensea	-0.521182	0.00421847
659	ARL16	cg08782899	0.202963	0.00490441	TSS1500	shore	-0.432512	0.0199658
660	NEDD4L	cg26938118	0.273763	4.60754e-18	Body	opensea	-0.418719	0.0246495
661	NEDD4L	cg23757461	0.327131	1.3024e-07	5'UTR	shore	-0.4133	0.0267222
662	NEDD4L	cg26034769	0.236388	0.00851642	1stExon	shelf	-0.372414	0.0474291
663	SMAD7	cg07661480	0.204429	6.30573e-09	3'UTR	island	-0.420197	0.0241079
664	SMAD7	cg11909137	0.290967	0.000162788	Body	opensea	-0.468473	0.0111052
665	SERPING1	cg02520020	0.212733	6.43911e-05	TSS1500	opensea	-0.382759	0.0412565
666	CAPG	cg19627006	0.207336	8.6364e-05	5'UTR	shelf	-0.461576	0.0124816
667	SYTL3	cg12934258	0.293651	1.17019e-08	Body	opensea	-0.551232	0.0022741
668	SYTL3	cg11879354	0.466934	2.20378e-07	5'UTR	opensea	-0.382759	0.0412565
669	GYPC	cg01342981	0.247366	6.21175e-06	Body	shore	-0.623153	0.000406291
670	GYPC	cg04453971	0.268759	0.000122088	TSS200	shore	-0.588177	0.0009846
671	ABCC1	cg09109383	0.467145	1.15036e-10	Body	opensea	-0.590148	0.000939103
672	CBX4	cg00483030	0.230504	0.00372111	Body	shore	-0.37734	0.0444033
673	FSTL4	cg08705647	0.530005	2.98627e-17	Body	opensea	0.383251	0.0409797
674	CACNA1H	cg26995942	0.205273	3.31236e-08	Body	shore	-0.396552	0.034054
675	CACNA1H	cg07632618	0.383059	6.72761e-07	Body	island	-0.596059	0.000813421
676	CACNA1H	cg09249980	0.355783	3.70605e-06	Body	shelf	-0.514778	0.00478071
677	CACNA1H	cg16665866	0.32742	3.9302e-06	Body	shore	-0.70936	2.73997e-05
678	CACNA1H	cg00300794	0.271316	2.41438e-05	Body	shore	-0.497044	0.00668487
679	CACNA1H	cg06008356	0.24378	3.25352e-05	Body	shelf	-0.480788	0.00896539
680	CACNA1H	cg26915870	0.223673	5.40892e-05	Body	island	-0.656158	0.000159447
681	CACNA1H	cg09860450	0.357564	5.7566e-05	Body	shore	-0.536453	0.00310184
682	NPAS2	cg01247693	-0.298125	0.00370463	5'UTR	opensea	0.635961	0.000286205
683	CACNA1H	cg00592007	0.265392	0.000256684	Body	shore	-0.493596	0.00712197
684	CACNA1H	cg01249187	0.401601	0.000816073	Body	island	-0.406404	0.0295656
685	CACNA1H	cg10083464	0.323193	0.00124197	Body	shore	-0.607389	0.000612962
686	CACNA1H	cg11789492	0.385	0.00199104	Body	island	-0.638916	0.000263396
687	NPAS2	cg21609584	-0.290221	0.00180755	5'UTR	opensea	0.622167	0.000417131
688	CACNA1H	cg08885265	0.217497	0.00219341	Body	shore	-0.587192	0.00100806
689	NANS	cg13527921	0.471634	2.66596e-07	Body	shore	-0.427094	0.0217088
690	PLEKHG4B	cg05155047	0.328483	1.61678e-05	Body	shore	0.624446	0.000293978
691	JUP	cg03859673	0.213278	1.24019e-05	Body	opensea	0.416256	0.0255745
692	SGMS2	cg00718036	0.211622	3.45037e-08	TSS1500	shore	-0.567488	0.00159125
693	SGMS2	cg16362005	0.215144	2.40816e-05	TSS1500	opensea	0.440394	0.0176396
694	MAFK	cg07351675	0.214428	0.00255083	5'UTR	shelf	-0.385714	0.0396177
695	TCF7L2	cg00159523	0.335023	0.0016207	Body	shore	-0.494581	0.00699467
696	OBSCN	cg19789505	0.215859	3.39993e-08	TSS1500	opensea	-0.477833	0.00944402
697	OBSCN	cg18329175	0.216428	2.35166e-07	TSS1500	opensea	-0.471921	0.0104665
698	OBSCN	cg25002294	0.2721	0.0055559	Body	shore	0.37931	0.0432374
699	ALPK3	cg06271561	0.387955	2.22527e-17	TSS200	shore	-0.441379	0.0173654
700	FHL3	cg08423562	0.260614	0.000276383	5'UTR	opensea	-0.569458	0.00152208
701	TSEN54	cg06665453	0.314208	0.000335875	3'UTR	shore	-0.396552	0.034054
702	TRPT1	cg08155741	0.301248	0.000668443	TSS1500	shore	-0.481773	0.0088105
703	DAAM2	cg26786974	0.33198	2.64598e-07	Body	opensea	-0.467488	0.0112936
704	HPCAL1	cg14118850	0.274687	7.26311e-07	5'UTR	shelf	-0.399015	0.0328829
705	HPCAL1	cg18022012	0.585808	7.94392e-07	5'UTR	shore	-0.437931	0.0183409
706	HPCAL1	cg16246488	0.328393	0.00108099	5'UTR	shore	-0.451724	0.0146954
707	HPCAL1	cg11147193	0.215544	0.00277032	TSS1500	shore	-0.371921	0.0477406
708	ABR	cg16374343	0.345622	1.63523e-07	Body	shore	-0.456158	0.0136615
709	ABR	cg26013733	0.266816	1.10536e-06	Body	shelf	-0.486207	0.00814128
710	TRIM8	cg14255417	0.303585	0.000124223	3'UTR	shore	-0.435468	0.0190652
711	DPP6	cg22255773	0.291491	0.00364872	Body	opensea	0.635266	0.00021352
712	ERICH1	cg19259199	0.26152	0.000365424	TSS1500	island	-0.376355	0.0449956
713	CARKD	cg01636873	0.549659	1.29502e-11	Body	shelf	-0.475862	0.00977501
714	CARKD	cg17643624	0.245253	0.00866659	Body	shelf	-0.412315	0.027114
715	LCN2	cg21157065	0.200274	9.09127e-08	Body	opensea	-0.402212	0.0305418
716	RCBTB2	cg11093142	0.428931	0.000110334	Body	opensea	-0.436453	0.0187727
717	RCBTB2	cg25165199	0.251896	0.000538415	TSS1500	shore	-0.451724	0.0146954
718	FAM53B	cg20435097	0.458779	7.13107e-07	Body	opensea	-0.46601	0.0115812
719	MOV10	cg00118507	0.212889	0.000587647	TSS1500	shore	-0.416749	0.0253873
720	MITF	cg04811592	0.353085	9.71189e-05	Body	opensea	-0.468038	0.0104531
721	MITF	cg06070625	0.408874	0.000195018	Body	opensea	-0.395862	0.0335268
722	GAS2L1	cg24844449	0.299965	1.74294e-08	Body	island	-0.459606	0.0129003
723	GAS2L1	cg03167954	0.241962	4.64146e-07	3'UTR	island	-0.49803	0.00656427
724	GAS2L1	cg02241145	0.403138	4.70623e-07	Body	shore	-0.380296	0.0426637
725	SPATA2L	cg06271850	0.309577	0.000313521	Body	shore	-0.373892	0.0465045
726	RASSF4	cg01484915	0.423117	4.07941e-08	5'UTR	shelf	-0.518227	0.00447046
727	NXN	cg10805039	0.303129	0.00361151	Body	opensea	-0.409561	0.0273598
728	BMP1	cg00920938	0.203015	0.000140487	Body	shore	-0.485222	0.00828613
729	MYO10	cg15954031	0.403283	7.49808e-09	Body	opensea	-0.454187	0.0141132
730	SPEG	cg18131810	0.241223	0.000454433	Body	shore	-0.405911	0.0297779
731	TNIP2	cg07094298	0.237957	0.0023019	Body	opensea	-0.380788	0.0423792
732	FARP1	cg16450249	0.2963	1.119e-06	Body	opensea	-0.453695	0.014228
733	FARP1	cg15168958	0.293541	5.72086e-05	Body	opensea	-0.465517	0.0116785
734	FARP1	cg10959664	0.254371	0.000299448	Body	opensea	-0.599015	0.000756279
735	FARP1	cg20750642	0.298114	0.0039008	3'UTR	opensea	-0.75468	5.02371e-06
736	FARP1	cg14789645	0.235622	0.00493918	TSS1500	shore	-0.573399	0.00139152
737	SETBP1	cg24217948	0.268916	3.07788e-12	5'UTR	shore	-0.718227	1.97824e-05
738	MAP3K6	cg26161024	0.246207	9.38345e-08	TSS1500	shore	-0.671429	9.95298e-05
739	ASPSCR1	cg10080728	0.337597	0.000990461	Body	shelf	-0.387192	0.0388183
740	CTBP1	cg09758273	0.428339	4.11311e-07	Body	shelf	-0.442365	0.0170948
741	CTBP1	cg12474824	0.287402	7.29056e-05	Body	shore	-0.496059	0.00680735
742	ELMO1	cg03736789	-0.268443	0.00685825	TSS200	opensea	0.370936	0.0483684
743	CTBP1	cg00070460	0.232153	0.000329992	Body	shore	-0.386207	0.0393498
744	CTBP1	cg02384251	0.214134	0.00120379	3'UTR	island	-0.517734	0.0045137
745	INPP5A	cg27297192	0.25178	7.37357e-06	Body	shelf	0.374877	0.0458961
746	FGF2	cg08421768	-0.312909	0.00292041	Body	opensea	0.696552	4.31876e-05
747	INPP5A	cg12417955	0.209179	1.24912e-05	Body	shore	-0.451232	0.0148142
748	LTBP3	cg19948253	0.236273	1.85317e-05	Body	shelf	-0.376847	0.0446987
749	SH3RF3	cg20810222	0.363919	1.53972e-09	Body	opensea	-0.392611	0.0359983
750	TBX20	cg12467749	-0.232503	9.52378e-05	TSS1500	island	0.625924	0.000281605
751	ZNF648	cg19866866	0.252249	0.00662226	Body	island	0.494089	0.00705807
752	MTUS2	cg18247090	0.229355	5.23096e-07	Body	opensea	0.403458	0.0299822
753	MTUS2	cg25319237	0.28424	1.74976e-06	Body	shelf	-0.414816	0.0252544
754	FOXP1	cg08038033	0.609337	8.90354e-09	5'UTR	opensea	-0.387685	0.0385547
755	FOXP1	cg08080735	0.451601	6.82584e-08	5'UTR	opensea	-0.385222	0.0398871
756	FOXP1	cg12431087	0.436729	2.39026e-07	5'UTR	opensea	-0.384236	0.0404304
757	FOXP1	cg20506347	0.562494	3.7321e-07	5'UTR	opensea	-0.397044	0.0338171
758	FOXP1	cg25481160	0.434487	0.000371795	Body	shelf	-0.438916	0.0180576
759	FOXP1	cg22076311	0.338157	0.00179549	Body	opensea	-0.379803	0.0429498
760	ST5	cg05382313	0.263897	0.00576215	5'UTR	opensea	-0.430049	0.0207431
761	KCNQ1	cg12141659	0.244069	0.00791313	Body	opensea	0.47931	0.00920207
762	KCNQ1	cg18759359	0.203513	2.60447e-13	Body	opensea	0.373399	0.046811
763	TNXB	cg07148038	0.202894	2.70904e-08	Body	shelf	-0.406897	0.0293546
764	TNXB	cg24426208	0.226961	1.68374e-07	Body	shelf	-0.428571	0.0212214
765	HCLS1	cg00141162	0.231438	3.12627e-07	1stExon	opensea	-0.54532	0.00257878
766	INPP5A	cg15598850	-0.274345	0.000462891	Body	shore	0.381281	0.0420963
767	HCLS1	cg02167021	0.250745	0.000329266	TSS200	opensea	-0.547783	0.00244779
768	PCCA	cg06568323	0.295394	9.27744e-13	Body	shelf	-0.509852	0.00525587
769	S100A16	cg19255608	0.241263	1.19088e-06	5'UTR	opensea	-0.723153	1.64548e-05
770	FAT1	cg01454936	-0.385953	0.000262699	Body	opensea	0.421675	0.0235762
771	SNX29	cg02910054	0.382404	7.16534e-09	Body	opensea	-0.408374	0.028729
772	SNX29	cg01858712	0.331639	1.11758e-08	Body	opensea	-0.379803	0.0429498
773	ADAMTS13	cg08795752	0.36358	1.11325e-06	Body	shore	-0.429557	0.0209015
774	ARHGEF17	cg08679180	0.284051	1.52151e-05	Body	opensea	-0.439901	0.017778
775	DLST	cg18107290	0.321971	1.53316e-07	Body	shelf	-0.4867	0.00806967
776	MRI1	cg08577727	0.322083	1.12265e-05	Body	shore	-0.414778	0.0261432
777	FAM107A	cg01446393	0.223734	1.68825e-15	TSS200	opensea	-0.546798	0.00249948
778	FAM107A	cg02615468	0.241726	9.49679e-16	TSS200	opensea	-0.480788	0.00896539
779	FAM107A	cg06638451	0.625166	6.32214e-13	1stExon	opensea	-0.455665	0.0137733
780	FAM107A	cg25791330	0.21034	5.61994e-08	TSS1500	opensea	-0.414286	0.026335
781	FAM107A	cg26386826	0.304843	1.01418e-06	Body	opensea	-0.385222	0.0398871
782	SIPA1	cg16168321	0.401165	1.74467e-05	5'UTR	shelf	-0.401478	0.0317449
783	FAT1	cg01478179	-0.398435	2.84655e-05	Body	opensea	0.419212	0.0244679
784	FAT1	cg01585180	-0.315781	0.00138794	Body	opensea	0.464039	0.0119744
785	SIPA1	cg15425427	0.239273	0.000327986	5'UTR	shelf	-0.40197	0.0315213
786	FAT1	cg02325160	-0.283062	0.00419154	Body	opensea	0.505911	0.00566462
787	FAT1	cg03064793	-0.240413	0.00565262	Body	opensea	0.589655	0.000950302
788	PDGFRB	cg01816748	0.259922	8.91318e-07	Body	shore	-0.494581	0.00699467
789	PDGFRB	cg02414981	0.246786	2.89393e-08	Body	shore	-0.710345	2.64365e-05
790	PDGFRB	cg04173992	0.226031	5.49077e-08	5'UTR	opensea	-0.506404	0.00561208
791	SLC12A7	cg21334510	0.333187	5.59329e-08	Body	island	-0.376847	0.0446987
792	SLC12A7	cg13592947	0.332341	1.29065e-05	Body	shore	-0.452217	0.0145773
793	BAIAP3	cg06161600	0.226601	0.00244771	Body	island	-0.368473	0.0499671
794	CTDSPL	cg04431143	0.292167	4.81994e-05	Body	opensea	-0.387192	0.0388183
795	CTDSPL	cg12919119	0.272342	0.000191109	Body	shore	-0.391626	0.0364982
796	CEACAM1	cg14904363	0.359815	1.27523e-07	5'UTR	opensea	-0.501786	0.00554744
797	ECE1	cg16603916	0.277248	1.79574e-07	Body	shore	-0.418719	0.0246495
798	ECE1	cg13086983	0.390993	1.55051e-05	Body	opensea	-0.414286	0.026335
799	ECE1	cg01780990	0.256804	6.87803e-05	TSS1500	opensea	-0.418227	0.0248323
800	NIN	cg16449219	0.422025	8.43746e-05	5'UTR	opensea	-0.508374	0.00540609
801	NIN	cg20033652	0.352667	0.000933005	5'UTR	opensea	-0.593596	0.000863881
802	NIN	cg20969923	0.23207	0.00186579	5'UTR	shore	-0.573892	0.00137591
803	CACNA2D2	cg12214647	0.210743	8.75747e-19	Body	opensea	0.399015	0.0328829
804	KCNK12	cg22162312	0.333262	1.44455e-11	Body	shelf	0.575369	0.00132998
805	FAT1	cg03580236	-0.515785	2.52539e-05	Body	opensea	0.662562	0.000131272
806	FAT1	cg03844826	-0.342106	0.0013083	Body	opensea	0.415764	0.0257629
807	KCNK12	cg27138584	0.317026	2.71872e-05	Body	shore	-0.495074	0.00693175
808	COL5A2	cg10765212	0.301611	1.96982e-05	TSS200	opensea	-0.451232	0.0148142
809	COL5A2	cg22774472	0.31993	0.00171997	TSS200	opensea	-0.408374	0.028729
810	TRIM44	cg02297591	0.367633	1.51002e-12	3'UTR	opensea	0.393596	0.0355039
811	NDRG1	cg25232510	0.284251	7.98905e-05	5'UTR	shelf	-0.613793	0.000519978
812	FAT1	cg08100122	-0.387896	0.000265071	Body	opensea	0.478818	0.00928213
813	NDRG1	cg17129188	0.3416	0.00319172	5'UTR	shore	-0.593596	0.000863881
814	SBNO2	cg06578434	0.391113	7.51259e-09	5'UTR	island	-0.401478	0.0317449
815	SBNO2	cg07573872	0.266483	0.00067036	Body	shelf	-0.413793	0.026528
816	FAT1	cg12770844	-0.470351	2.17013e-05	Body	opensea	0.469458	0.0109194
817	SBNO2	cg07737503	0.200569	0.00267421	Body	opensea	-0.392611	0.0359983
818	SBNO2	cg08408668	0.268003	0.00515326	5'UTR	island	-0.415271	0.0259525
819	CAMK1D	cg00115178	0.228062	8.77727e-05	Body	opensea	-0.508867	0.00535561
820	FAT1	cg15815948	-0.246125	0.00509909	Body	opensea	0.453695	0.014228
821	CAMK1D	cg26231267	0.215118	0.00381434	Body	opensea	-0.646305	0.000213209
822	RGS17	cg24028809	0.274617	0.0030626	5'UTR	opensea	0.42266	0.0232271
823	BSN	cg18644653	0.260615	2.16976e-08	Body	opensea	-0.396552	0.034054
824	FAT1	cg17090401	-0.310274	0.00219459	5'UTR	shelf	0.378325	0.0438172
825	BSN	cg24296397	0.224914	5.72713e-07	Body	shelf	-0.581281	0.00115932
826	ENPEP	cg17854440	0.333388	1.67081e-06	1stExon	shore	-0.421675	0.0235762
827	NR2F2	cg13772742	0.318443	0.000746349	Body	shore	-0.650246	0.000190046
828	NR2F2	cg20327163	0.359057	0.000747141	Body	island	-0.679803	7.59918e-05
829	NR2F2	cg20710266	0.369409	4.63431e-05	Body	shore	-0.726601	1.44488e-05
830	NR2F2	cg22283959	0.450621	8.29181e-05	Body	shelf	-0.473399	0.0102025
831	NR2F2	cg27236629	0.382416	0.000262513	Body	island	-0.485222	0.00828613
832	SLC22A23	cg04327675	0.202901	0.00241578	Body	opensea	-0.461576	0.0124816
833	SLC22A23	cg07081061	0.326368	0.00253305	Body	opensea	-0.602463	0.000694069
834	NFIC	cg03281139	0.551512	1.65619e-06	Body	shore	-0.41133	0.0275106
835	FAT1	cg17291613	-0.311835	0.00129305	Body	opensea	0.445813	0.0161753
836	TRIM26	cg27136023	0.253829	2.63929e-11	5'UTR	opensea	-0.390148	0.0372587
837	ZMIZ1	cg17823346	0.44797	1.2909e-13	5'UTR	opensea	-0.553202	0.00217972
838	ZMIZ1	cg24982682	0.585736	4.19773e-09	5'UTR	opensea	-0.380788	0.0423792
839	ZMIZ1	cg13186559	0.538608	1.60533e-08	5'UTR	opensea	-0.538916	0.0029481
840	ZMIZ1	cg17958516	0.332221	5.91265e-08	5'UTR	opensea	-0.435961	0.0189185
841	ZMIZ1	cg14530290	0.514207	7.00181e-08	5'UTR	opensea	-0.672414	9.64613e-05
842	ZMIZ1	cg06259934	0.270184	4.81804e-07	Body	opensea	-0.380296	0.0426637
843	ZMIZ1	cg00533891	0.289168	4.00614e-06	5'UTR	opensea	-0.385714	0.0396177
844	ZMIZ1	cg13843840	0.278461	0.000103274	Body	opensea	-0.400985	0.0319699
845	ZMIZ1	cg27537918	0.208405	0.000140242	5'UTR	opensea	-0.633498	0.000306517
846	ZMIZ1	cg06308720	0.284917	0.000807956	Body	shelf	-0.51133	0.00510925
847	LIMS2	cg03555157	0.236628	1.57013e-06	1stExon	opensea	-0.474384	0.0100297
848	LIMS2	cg03689092	0.300672	1.34725e-09	1stExon	opensea	-0.371921	0.0477406
849	CCDC57	cg26507988	0.421929	4.8565e-08	Body	opensea	-0.428079	0.0213828
850	TRAPPC9	cg12844366	0.259261	7.48428e-13	Body	shelf	-0.42266	0.0232271
851	TRAPPC9	cg23401796	0.345514	0.00199159	Body	opensea	-0.440394	0.0176396
852	TRAPPC9	cg04259001	0.203429	0.00647864	Body	opensea	-0.451232	0.0148142
853	NR3C1	cg12466613	0.378956	2.19669e-07	TSS1500	opensea	-0.495567	0.00686931
854	NRP2	cg05264870	0.393984	4.57944e-06	Body	opensea	-0.527586	0.00371405
855	NRP2	cg06285439	0.237233	2.97368e-05	Body	opensea	-0.478325	0.00936278
856	NRP2	cg14158558	0.263618	5.64403e-06	Body	opensea	-0.478325	0.00936278
857	NRP2	cg19731541	0.389621	7.9518e-05	Body	shelf	-0.458128	0.013222
858	NRP2	cg25320169	0.317182	1.12708e-05	3'UTR	opensea	-0.673892	9.20153e-05
859	C8orf4	cg13125627	0.3819	7.39341e-06	TSS1500	opensea	-0.416256	0.0255745
860	SERTAD2	cg12734023	0.210532	2.90754e-05	Body	opensea	0.487685	0.00792805
861	NGFR	cg17129388	0.223425	0.000524082	TSS1500	shore	-0.480039	0.00840383
862	SMTN	cg17402397	0.384957	6.91637e-07	5'UTR	shore	-0.380296	0.0426637
863	SEC61A1	cg10167316	0.332106	3.82727e-05	Body	opensea	-0.461084	0.0125852
864	SEC61A1	cg14788242	0.212942	0.00748156	Body	shelf	-0.447783	0.0156687
865	FAT1	cg21367866	-0.287238	0.00243581	Body	opensea	0.389655	0.037515
866	RASSF1	cg03297783	0.222702	0.00874545	TSS1500	shore	-0.479369	0.00850856
867	FGD6	cg16526732	0.265679	1.26933e-09	Body	opensea	-0.5	0.00632864
868	IFNGR2	cg22669060	0.434864	3.84552e-06	TSS1500	shore	-0.389163	0.0377728
869	FAT1	cg22867837	-0.247006	0.00300474	Body	opensea	0.383744	0.0407043
870	KSR1	cg05784862	0.274125	0.000904507	TSS200	opensea	-0.725123	1.52782e-05
871	KSR1	cg09910461	0.379441	4.48594e-07	5'UTR	opensea	-0.711823	2.50499e-05
872	KSR1	cg13316720	0.31999	0.00723687	5'UTR	opensea	-0.698522	4.03189e-05
873	KSR1	cg17585031	0.329921	1.20105e-06	TSS200	opensea	-0.500985	0.00621356
874	FAT1	cg24261767	-0.452182	5.91046e-05	Body	opensea	0.394089	0.0352589
875	MAT2B	cg03059048	0.33701	0.00570617	Body	shore	0.380788	0.0423792
876	LHFPL2	cg26951839	0.488933	1.79625e-05	Body	opensea	-0.392611	0.0359983
877	CDR2	cg06470626	0.3333	6.61819e-08	Body	opensea	-0.436946	0.0186278
878	SLCO2B1	cg08597735	0.206828	1.85878e-05	3'UTR	opensea	-0.482759	0.00865788
879	FMOD	cg22705746	0.213319	0.00387015	TSS1500	opensea	-0.413793	0.026528
880	CERK	cg18614510	0.282862	0.0022608	3'UTR	island	-0.524138	0.00397878
881	CERK	cg16154810	0.243801	0.00303348	TSS1500	opensea	-0.536453	0.00310184
882	AGTRAP	cg08425760	0.238512	0.00491076	TSS1500	shore	-0.425616	0.0222055
883	CIITA	cg08985333	0.400061	3.41408e-07	TSS200	shore	-0.457143	0.0134402
884	TMTC4	cg05645787	0.24087	4.19057e-09	Body	opensea	-0.441872	0.0172297
885	TMTC4	cg22575966	0.269585	0.00205363	Body	opensea	-0.482759	0.00865788
886	EXOC3	cg14122633	0.215389	1.70728e-06	Body	opensea	-0.57734	0.00127081
887	CRIM1	cg00850538	0.320486	0.000415552	TSS1500	shore	-0.401478	0.0317449
888	HRAS	cg05798318	0.286122	0.00557553	TSS1500	island	0.379803	0.0429498
889	GNG4	cg25217276	0.620689	2.18703e-08	5'UTR	opensea	0.374877	0.0458961
890	RAVER1	cg23490822	0.230243	0.000945236	Body	island	-0.395074	0.0347728
891	FAT1	cg25124956	-0.505389	5.95014e-07	3'UTR	opensea	0.478325	0.00936278
892	KCNQ1	cg14089425	-0.288347	0.000961587	Body	opensea	0.468473	0.0111052
893	ZFP36L2	cg06169590	0.392837	1.13093e-05	TSS1500	shore	-0.455172	0.0138858
894	ZFP36L2	cg04920761	0.353445	7.25654e-05	TSS1500	shore	-0.474877	0.00994415
895	ZFP36L2	cg11462315	0.389585	9.55272e-05	TSS1500	shore	-0.407882	0.0289363
896	ZFP36L2	cg20660171	0.344317	0.000117328	TSS1500	shore	-0.447291	0.0157941
897	ZFP36L2	cg01094950	0.351369	0.000157784	TSS1500	shore	-0.450246	0.0150542
898	ZFP36L2	cg16876647	0.304187	0.00285208	Body	island	-0.449261	0.0152976
899	ZFP36L2	cg08193650	0.271898	0.00421456	Body	island	-0.531527	0.0034302
900	RASGEF1A	cg16595288	0.314348	9.30034e-08	Body	shore	-0.448768	0.0154204
901	ARID5B	cg13344587	0.227783	0.00539542	Body	opensea	-0.53399	0.00326246
902	ARID5B	cg24495062	0.240153	0.0087386	Body	opensea	-0.402956	0.0310778
903	PPM1H	cg10524576	0.254109	0.000127146	Body	opensea	-0.387192	0.0388183
904	B3GNTL1	cg01780009	0.298873	0.000134881	Body	opensea	-0.375369	0.0455944
905	MDFI	cg25254074	0.22836	0.00143515	Body	shore	-0.380742	0.0415858
906	EIF4H	cg26311610	0.202628	0.000130111	Body	shelf	-0.478325	0.00936278
907	MRVI1	cg05382956	0.353868	3.26602e-06	Body	opensea	-0.552217	0.00222647
908	KCNQ1	cg26639864	-0.25224	0.00774235	Body	opensea	0.407882	0.0289363
909	MRVI1	cg06885583	0.240594	1.28107e-06	TSS1500	opensea	-0.530542	0.00349935
910	MRVI1	cg15505860	0.232309	2.15583e-09	TSS1500	opensea	-0.489163	0.00771958
911	MRVI1	cg17299456	0.323052	1.0927e-05	5'UTR	opensea	-0.595074	0.000833287
912	MRVI1	cg17542333	0.268263	3.73487e-12	5'UTR	opensea	-0.592611	0.000884816
913	MRVI1	cg24365867	0.264669	5.70765e-06	TSS1500	opensea	-0.541872	0.00277233
914	MRVI1	cg26262049	0.366498	4.38357e-07	Body	opensea	-0.40936	0.028318
915	C8orf58	cg07538190	0.311618	4.27514e-06	Body	shore	-0.374384	0.0461995
916	FAM129B	cg01785473	0.207459	0.00174279	Body	opensea	0.426108	0.0220389
917	BCAS4	cg02990474	0.282615	1.42319e-05	Body	shelf	-0.383744	0.0407043
918	PCCA	cg22432024	-0.20872	0.00805248	Body	opensea	-0.417241	0.0252012
919	LINGO4	cg07206827	0.273537	0.000359507	TSS1500	opensea	0.393596	0.0355039
920	CCDC102A	cg27518892	0.313873	4.55816e-09	5'UTR	shelf	-0.411823	0.0273117
921	SQSTM1	cg01152073	0.314152	2.47427e-05	5'UTR	shore	-0.407389	0.0291448
922	SQSTM1	cg15126957	0.270625	0.000319512	5'UTR	shore	-0.3867	0.0390833
923	DDB2	cg13749927	0.328574	0.00342707	Body	shore	-0.369951	0.0490029
924	DDB2	cg14943002	0.284194	3.14851e-07	Body	opensea	-0.58867	0.000973049
925	RAB27A	cg01028364	0.202875	0.000238289	5'UTR	opensea	0.451724	0.0146954
926	RAB27A	cg24687805	0.224235	0.00322045	Body	opensea	0.484729	0.00835938
927	EXOC4	cg07491979	0.408968	6.82908e-11	Body	opensea	-0.399507	0.0326527
928	C1R	cg05592114	0.250851	4.44491e-12	Body	opensea	-0.527586	0.00371405
929	C1R	cg11751101	0.361746	5.65338e-08	Body	opensea	-0.441872	0.0172297
930	KIFC3	cg07925311	0.355619	1.56781e-06	5'UTR	shore	-0.429064	0.0210609
931	VEGFB	cg02293991	0.274842	8.23837e-06	3'UTR	shelf	-0.380788	0.0423792
932	NTHL1	cg08326468	0.274901	4.58405e-07	Body	shelf	-0.523645	0.0040179
933	ZNF598	cg26804891	0.282561	2.29545e-05	Body	shore	-0.442365	0.0170948
934	ENTPD3	cg16822855	0.243609	1.75161e-06	TSS1500	shore	-0.371721	0.0470866
935	BMPER	cg26193418	0.367563	1.90821e-08	Body	opensea	-0.581281	0.00115932
936	CSF2RB	cg16232674	0.224249	0.00323433	TSS200	opensea	-0.557143	0.00200109
937	TMEM110	cg13641778	0.348371	7.03561e-08	Body	opensea	-0.428079	0.0213828
938	SHMT2	cg11851129	0.217378	0.00014974	Body	shore	-0.581281	0.00115932
939	SHMT2	cg25110782	0.207829	2.68918e-07	1stExon	shore	-0.55468	0.00211118
940	CDC42EP4	cg17379666	0.442192	7.25186e-06	5'UTR	shelf	-0.448768	0.0154204
941	KLF6	cg08614871	0.263547	0.000279416	Body	shore	-0.558128	0.00195847
942	KLF6	cg12570716	0.223015	0.00311776	Body	shore	-0.403448	0.0308579
943	KLF6	cg24003508	0.412892	5.75813e-07	Body	shore	-0.54532	0.00257878
944	KLF6	cg24287110	0.294374	0.000124829	Body	shore	-0.689655	5.47283e-05
945	PIP5K1B	cg13750902	-0.319387	0.000725404	5'UTR	shore	0.433711	0.0187468
946	ZMYND15	cg19841506	0.234754	0.00403909	TSS1500	island	-0.385222	0.0398871
947	PKIB	cg08198075	0.255964	0.00338732	5'UTR	opensea	0.484341	0.00775716
948	ECE1	cg18116670	-0.256193	0.00138583	Body	opensea	-0.492611	0.00725125
949	PAK6	cg12423123	0.298172	0.00135715	5'UTR	island	-0.446305	0.0160474
950	MCF2L	cg01083884	0.260523	1.26234e-06	Body	opensea	-0.454187	0.0141132
951	TFEB	cg02286549	0.520267	1.47621e-06	5'UTR	shore	-0.405911	0.0297779
952	TFEB	cg10696677	0.368571	1.1503e-05	5'UTR	opensea	-0.371921	0.0477406
953	MAPK7	cg13832201	0.319807	0.000339819	Body	island	-0.514286	0.0048265
954	MICALL2	cg06074896	0.255076	0.0045254	TSS1500	shore	-0.385714	0.0396177
955	ZNF576	cg04307587	0.333203	3.23666e-08	3'UTR	shelf	-0.429064	0.0210609
956	JPH3	cg00680827	0.305961	0.000377704	TSS1500	shore	0.605717	0.00049766
957	JPH3	cg00922281	0.363979	0.000142023	Body	shore	0.579103	0.000996326
958	JPH3	cg01546963	0.212767	0.000634829	Body	shore	0.505175	0.00518714
959	JPH3	cg02086457	0.243237	5.58678e-05	Body	island	0.586989	0.00081616
960	JPH3	cg02529544	0.240768	0.00397321	Body	opensea	0.457861	0.0125047
961	CAMK1D	cg26966582	-0.253787	0.00264121	Body	opensea	0.603941	0.000668807
962	JPH3	cg03834411	0.222664	0.00371315	Body	shelf	0.469197	0.0102385
963	JPH3	cg26684601	0.380551	2.47556e-05	Body	shore	0.685559	4.05908e-05
964	JPH3	cg26764761	0.24467	0.000167421	Body	shelf	0.425333	0.0214371
965	CAB39	cg01413054	0.24417	0.00741603	Body	opensea	-0.399015	0.0328829
966	HSPA2	cg25581090	0.298138	2.88131e-05	3'UTR	shore	-0.500985	0.00621356
967	KCNMB4	cg21557445	-0.268702	0.00276015	Body	opensea	0.432812	0.0190215
968	S100A10	cg04989070	0.328914	0.000256726	5'UTR	shelf	0.389163	0.0377728
969	RTP4	cg26824216	0.232364	0.00858258	TSS200	opensea	-0.414829	0.0252492
970	ARL5B	cg17156983	0.262408	8.96513e-05	Body	shelf	-0.475369	0.00985927
971	CRIM1	cg03428619	-0.233551	0.00171849	Body	opensea	0.507389	0.00550826
972	VEPH1	cg22796958	0.285569	0.000149961	TSS200	opensea	-0.442857	0.0169608
973	KCNQ2	cg12173392	0.218495	0.000440683	Body	shelf	0.423645	0.0228823
974	KCNQ2	cg15616083	0.21199	0.00122748	TSS1500	shore	0.626108	0.000375236
975	KCNQ2	cg23693705	0.29839	8.28137e-10	Body	island	0.423645	0.0228823
976	FADS3	cg03046346	0.28237	3.81013e-05	Body	shore	-0.369951	0.0490029
977	CAMTA1	cg06082897	0.317496	1.23981e-14	Body	shore	0.436946	0.0186278
978	CAMTA1	cg21583016	0.556624	4.9845e-11	Body	opensea	0.436453	0.0187727
979	RAPGEF1	cg14485643	0.412636	1.05171e-09	Body	opensea	-0.384284	0.0395718
980	RAPGEF1	cg21171461	0.627689	4.38154e-08	Body	opensea	-0.381574	0.0411054
981	MEIS2	cg02433515	0.211777	0.00254294	Body	opensea	0.471429	0.0105558
982	MEIS2	cg09896544	0.398759	6.05166e-05	Body	opensea	0.49803	0.00656427
983	MEIS2	cg22291711	0.3549	1.04288e-09	Body	opensea	0.494089	0.00705807
984	CRIM1	cg09530108	-0.224167	0.000109849	Body	shore	0.503941	0.00587899
985	DKK3	cg10986946	0.286129	0.000428828	Body	opensea	-0.610345	0.000568383
986	DKK3	cg26446832	0.212517	0.0022237	Body	opensea	-0.599507	0.000747104
987	RPS6KA1	cg13092108	0.276444	0.000696039	Body	shore	-0.669458	0.000105927
988	STAT5A	cg05744184	0.330413	0.00414944	3'UTR	shore	-0.400493	0.0321962
989	STAT5A	cg20388732	0.576511	5.50247e-09	TSS200	shore	-0.390148	0.0372587
990	STAT3	cg04598300	0.645574	1.33302e-06	5'UTR	opensea	-0.511823	0.00506116
991	CCDC108	cg01749213	-0.23572	0.000802583	TSS1500	shore	0.463604	0.0113093
992	C10orf128	cg25921502	-0.303963	0.000921089	3'UTR	opensea	0.417734	0.0250162
993	STAT3	cg07780782	0.202123	8.3321e-08	3'UTR	shore	-0.636453	0.000282287
994	SH3BP4	cg06638913	0.204949	4.48112e-06	5'UTR	opensea	0.369951	0.0490029
995	SH3BP4	cg14096415	0.300614	5.62997e-05	5'UTR	opensea	0.40936	0.028318
996	SH3BP4	cg24995678	0.228129	1.88645e-06	5'UTR	opensea	0.409852	0.0281143
997	TBC1D24	cg09370982	0.316886	0.00222227	Body	shore	-0.489655	0.00765114
998	LPPR4	cg23598604	0.232152	3.57189e-10	Body	shelf	0.484729	0.00835938
999	THBS1	cg02291532	0.265104	0.000149778	Body	shore	-0.495074	0.00693175
1000	TP73	cg00589002	0.202586	8.42302e-08	TSS1500	shore	0.526666	0.00333423
1001	TP73	cg03760518	0.222614	4.9906e-06	Body	island	0.545387	0.00221497
1002	PRKG1	cg11486694	-0.273639	4.89927e-06	Body	opensea	0.434975	0.0192129
1003	TP73	cg03846767	0.203639	4.91242e-05	1stExon	island	0.431088	0.0195575
1004	TP73	cg04562683	0.235406	4.75503e-07	Body	shelf	0.436014	0.0180581
1005	TP73	cg06202149	0.251526	3.14351e-06	TSS1500	shore	0.556719	0.00170925
1006	TP73	cg06376715	0.292373	8.87573e-06	Body	island	0.53578	0.00274019
1007	TP73	cg07045089	0.414276	3.88047e-08	Body	shelf	0.420002	0.0233079
1008	TP73	cg08764037	0.21043	4.02495e-05	Body	island	0.472718	0.00960901
1009	TP73	cg14084907	0.354578	3.93651e-05	Body	island	0.500801	0.0056561
1010	TP73	cg14979620	0.224737	9.50306e-07	Body	shelf	0.513364	0.00439786
1011	TP73	cg17163168	0.273963	0.00672964	Body	opensea	0.539475	0.00252673
1012	TP73	cg17471939	0.383997	1.44292e-07	Body	opensea	0.50622	0.00508015
1013	TP73	cg22039909	0.239981	9.70735e-07	Body	island	0.504742	0.00523204
1014	TP73	cg23052055	0.32136	6.46387e-06	TSS1500	shore	0.524449	0.00349438
1015	TP73	cg26055950	0.315783	1.22694e-05	Body	opensea	0.393398	0.0347462
1016	TP73	cg27055894	0.326883	4.69471e-07	5'UTR	opensea	0.526666	0.00333423
1017	SDC3	cg00456651	0.322015	1.99231e-06	Body	shore	-0.437438	0.0184839
1018	ZSWIM4	cg04391391	0.355949	2.95571e-06	TSS1500	shore	0.473399	0.0102025
1019	WWP2	cg00854324	0.262744	6.02566e-15	Body	opensea	-0.460591	0.0126895
1020	WWP2	cg26832686	0.224352	0.000201627	TSS1500	opensea	-0.397537	0.0335815
1021	PLEKHO1	cg23369564	0.215739	0.000465685	Body	shore	-0.525434	0.00342241
1022	NPTN	cg20505372	0.202993	3.83402e-06	Body	opensea	-0.431034	0.0204292
1023	GPR157	cg03583311	0.23198	6.2867e-05	Body	shore	-0.390196	0.0363845
1024	GPR157	cg14855124	0.238805	2.93783e-09	Body	opensea	-0.493411	0.00653024
1025	GIPC1	cg27651355	0.222669	0.000183633	TSS1500	shore	-0.4133	0.0267222
1026	ABHD6	cg17574812	0.298023	0.000168387	Body	opensea	0.435961	0.0189185
1027	EGFR	cg04116217	-0.228649	0.00388405	Body	opensea	0.450739	0.0149338
1028	RAB11FIP3	cg02102075	0.347021	5.64404e-06	TSS1500	shore	-0.405911	0.0297779
1029	TNFSF10	cg16555388	0.276279	0.00539722	5'UTR	opensea	-0.533005	0.00332868
1030	TNFSF10	cg21402832	0.245214	0.00797535	1stExon	opensea	-0.431527	0.0202738
1031	EGFR	cg18452131	-0.332616	0.000363772	Body	opensea	0.648276	0.000201335
1032	IKBKE	cg11739399	0.202213	6.01054e-05	3'UTR	opensea	-0.541379	0.00280098
1033	TNK2	cg15065340	0.321845	3.22553e-05	5'UTR	shelf	-0.512315	0.00501346
1034	TNK2	cg16568314	0.240491	4.18543e-07	5'UTR	shelf	-0.686207	6.14738e-05
1035	TNK2	cg23258717	0.251315	0.00412473	Body	shore	-0.426108	0.0220389
1036	TNK2	cg27418204	0.20222	0.000486555	Body	shelf	-0.480788	0.00896539
1037	LTBR	cg15784615	0.200105	0.000969554	Body	shore	-0.614286	0.000513367
1038	LTBR	cg19476647	0.212124	0.00712959	TSS1500	island	-0.517734	0.0045137
1039	HLA-E	cg09275023	-0.221627	0.00847323	TSS1500	shore	0.434483	0.0193616
1040	FYN	cg17076443	0.219877	6.2185e-09	5'UTR	opensea	-0.400049	0.0315332
1041	AGPAT2	cg01813139	0.325475	1.28931e-06	Body	island	-0.445813	0.0161753
1042	IRF1	cg21138405	0.20501	2.90006e-07	TSS1500	shore	-0.372906	0.0471193
1043	MAPK10	cg12520249	0.237723	0.00160134	5'UTR	opensea	-0.534975	0.00319737
1044	TTBK1	cg05020625	0.279611	0.0010228	Body	island	0.418227	0.0248323
1045	TTBK1	cg23514619	0.384564	1.05731e-07	Body	island	0.420197	0.0241079
1046	STOX2	cg01377200	0.365631	1.09899e-13	Body	opensea	0.477833	0.00944402
1047	PYCARD	cg05214748	0.309357	0.000119536	TSS200	shore	-0.393596	0.0355039
1048	SLC2A13	cg00790847	0.297488	0.000864088	Body	shore	-0.514286	0.0048265
1049	CDC25B	cg02737268	0.509484	5.6002e-08	Body	shelf	-0.499507	0.00638686
1050	USP13	cg05726764	0.37127	7.15687e-08	Body	opensea	-0.373399	0.046811
1051	ZNRF1	cg00433709	0.566814	2.20499e-16	Body	opensea	-0.399507	0.0326527
1052	KIAA0922	cg07954414	0.35649	0.000783401	Body	shore	-0.517241	0.00455729
1053	SEC24D	cg16640599	0.309715	1.51988e-06	Body	opensea	-0.782759	2.12614e-06
1054	SPON2	cg22602105	0.210547	1.91721e-06	TSS200	shore	-0.536946	0.00307055
1055	ST6GALNAC2	cg14385325	0.248089	5.18516e-06	Body	opensea	0.528571	0.00364125
1056	RAB7L1	cg16031515	0.301068	1.6516e-10	Body	shore	-0.403941	0.0306394
1057	RAB7L1	cg26418147	0.373969	2.45107e-09	Body	shore	-0.562069	0.00179576
1058	BCAT2	cg09430060	0.23468	1.42182e-09	Body	shelf	0.372906	0.0471193
1059	ZFYVE21	cg10126234	0.304791	8.28707e-05	Body	shore	-0.414286	0.026335
1060	MGMT	cg23004031	0.346098	0.0016497	Body	opensea	0.449261	0.0152976
1061	RTN4RL1	cg01019770	0.22211	0.00173351	TSS1500	shore	-0.560099	0.00187559
1062	TRIO	cg06952384	0.212876	3.8346e-06	Body	opensea	-0.562562	0.00177627
1063	DOCK2	cg14693941	-0.317438	6.47828e-06	Body	opensea	0.440887	0.017502
1064	TRIO	cg15689969	0.31365	1.74937e-05	Body	opensea	-0.411823	0.0273117
1065	ITGA9	cg05057834	0.209668	0.000693038	Body	shore	-0.699015	3.96291e-05
1066	ITGA9	cg13071386	0.205726	0.00405472	Body	island	-0.504433	0.00582476
1067	SLC25A25	cg14294859	0.583743	4.24364e-07	Body	opensea	-0.415764	0.0257629
1068	POLG	cg01192051	0.254063	8.41645e-07	TSS1500	shore	-0.393596	0.0355039
1069	TMEM79	cg07234388	0.207166	0.00119184	Body	shore	-0.455665	0.0137733
1070	RAP1GAP	cg22396755	0.345581	0.0033439	5'UTR	island	-0.413793	0.026528
1071	WDR5	cg03473042	0.242564	0.00825732	TSS1500	shore	-0.447783	0.0156687
1072	TLR4	cg02515422	0.432536	0.000319418	Body	opensea	-0.414286	0.026335
1073	TLR4	cg13730105	0.257117	0.000189282	Body	opensea	-0.519212	0.00438507
1074	TLR4	cg14605396	0.312517	0.000165928	Body	opensea	-0.564532	0.00170014
1075	PKIB	cg13053150	-0.289131	0.00111838	5'UTR	shelf	0.526511	0.00334521
1076	HK1	cg09273059	0.216052	7.27232e-17	Body	shore	-0.43202	0.0201193
1077	HK1	cg15358372	0.392457	1.22329e-07	Body	opensea	-0.523645	0.0040179
1078	HK1	cg22679940	0.204058	7.62278e-05	Body	opensea	-0.53202	0.00339607
1079	GALNS	cg07947266	0.222175	0.00186353	3'UTR	shore	-0.37931	0.0432374
1080	GALNS	cg08466889	0.214108	7.61927e-08	Body	shore	-0.461084	0.0125852
1081	SPRED3	cg10626063	0.393594	1.12125e-07	1stExon	shore	-0.634483	0.000298245
1082	TRIM65	cg10195415	-0.28866	3.36466e-06	Body	island	0.402463	0.0312989
1083	SPRED3	cg12018098	0.32483	5.47418e-06	Body	island	-0.502956	0.00598876
1084	CYFIP1	cg25409809	0.206061	0.00184064	5'UTR	opensea	-0.544335	0.00263285
1085	TRIM65	cg10927422	-0.266327	7.12447e-06	Body	shore	0.415271	0.0259525
1086	RNF213	cg11606607	0.257314	0.00101843	Body	opensea	-0.368473	0.0499671
1087	ATXN7L3	cg11255208	0.260919	0.000413806	Body	shore	-0.465025	0.0117764
1088	MARCH10	cg16661744	0.2578	0.00114591	Body	opensea	-0.470936	0.0106458
1089	MARCH10	cg22796355	0.205643	4.84956e-05	Body	shore	-0.370936	0.0483684
1090	MARCH10	cg22848970	0.383776	0.00100803	Body	shore	-0.431034	0.0204292
1091	TTBK1	cg07631407	-0.204464	0.00430989	Body	island	-0.414286	0.026335
1092	MUM1	cg23674169	0.314591	0.00379429	TSS200	shore	-0.395074	0.0347728
1093	NACC2	cg03587907	0.325958	0.00305091	5'UTR	island	-0.409852	0.0281143
1094	NACC2	cg14126392	0.242821	0.00603333	5'UTR	island	-0.54532	0.00257878
1095	ANKRD44	cg02965295	0.324693	0.000268298	Body	opensea	-0.381773	0.0418148
1096	TSC2	cg01952473	-0.346121	7.79533e-05	Body	shelf	-0.415271	0.0259525
1097	ANKS1B	cg20223206	-0.237995	0.00382988	Body	opensea	0.379803	0.0429498
1098	MUM1	cg26282762	-0.38436	1.03818e-05	Body	shore	-0.417734	0.0250162
1099	XKR4	cg05414135	0.241155	0.000115629	Body	opensea	-0.416749	0.0253873
1100	SMARCA2	cg03258139	0.220965	0.00167169	TSS1500	shore	-0.389163	0.0377728
1101	MACF1	cg00426822	0.38627	5.77684e-05	TSS1500	shore	-0.403448	0.0308579
1102	ZNF608	cg24650940	0.346897	8.01063e-05	Body	shore	-0.503696	0.0053418
1103	ZNF608	cg25012961	0.255019	3.22735e-05	Body	opensea	0.42829	0.0204535
1104	ZNF608	cg26413942	0.57115	1.16149e-05	TSS1500	opensea	-0.545589	0.00220496
1105	PTRF	cg27494254	0.303216	1.03396e-06	Body	opensea	-0.619704	0.000445346
1106	VPS37C	cg07179634	0.306404	0.000727811	5'UTR	opensea	-0.385714	0.0396177
1107	RGL2	cg05141234	0.244253	0.00187684	Body	shore	-0.409852	0.0281143
1108	MUM1	cg26540370	-0.25182	0.000339944	Body	shore	-0.50936	0.00530554
1109	RGL2	cg12118504	0.270486	0.000245451	Body	shore	-0.399507	0.0326527
1110	RGL2	cg19182289	0.257383	0.000355885	Body	shore	-0.451232	0.0148142
1111	ANKRD44	cg09496748	-0.208106	0.000220393	Body	island	0.421182	0.0237523
1112	ATN1	cg14996263	0.311561	0.00188998	Body	island	-0.389655	0.037515
1113	MS4A4A	cg01229998	-0.287272	2.32532e-06	Body	opensea	0.417241	0.0252012
1114	SND1	cg13969327	-0.23207	1.80365e-05	Body	opensea	0.478818	0.00928213
1115	MEGF11	cg08095985	0.284539	0.00258156	5'UTR	shore	-0.610174	0.000440381
1116	ITGAV	cg21878934	0.295631	2.73262e-05	TSS1500	opensea	-0.431527	0.0202738
1117	PPP2R2B	cg16125375	0.317678	7.61958e-11	5'UTR	opensea	-0.404976	0.0293117
1118	AGAP1	cg07642035	0.223046	3.50815e-08	Body	opensea	-0.469951	0.0108276
1119	AGAP1	cg20128773	0.257099	3.34372e-06	Body	opensea	-0.453202	0.0143437
1120	RARRES3	cg04999352	0.205719	8.24306e-06	Body	opensea	-0.414286	0.026335
1121	RARRES3	cg25599242	0.290363	0.000363145	1stExon	opensea	-0.529064	0.00360532
1122	ERG	cg18413706	-0.327503	1.61677e-08	Body	opensea	0.394581	0.0350151
1123	INPP5D	cg01218053	0.244789	7.79631e-05	Body	opensea	-0.519704	0.0043429
1124	INPP5D	cg02935132	0.255267	8.94751e-05	TSS1500	shore	-0.487685	0.00792805
1125	INPP5D	cg15131282	0.217704	1.77118e-06	TSS200	shore	-0.576847	0.00128539
1126	OSBPL3	cg04274758	-0.441745	1.66159e-05	Body	opensea	0.465025	0.0117764
1127	TMEM106A	cg03049782	0.278083	0.00504673	TSS200	island	-0.506897	0.00555996
1128	TMEM106A	cg04482110	0.313868	0.00126162	5'UTR	island	-0.558128	0.00195847
1129	TMEM106A	cg19548479	0.313099	0.00470499	TSS200	island	-0.457635	0.0133308
1130	TMEM106A	cg24940138	0.331178	0.00544169	TSS200	island	-0.508867	0.00535561
1131	RDH13	cg27282564	0.338743	4.21544e-06	5'UTR	shelf	0.376355	0.0449956
1132	B3GALTL	cg17180284	0.319553	0.0014151	Body	opensea	-0.785714	1.98939e-06
1133	DUSP16	cg23320499	0.572051	4.07079e-08	Body	opensea	-0.414778	0.0261432
1134	OSBPL3	cg11510182	-0.349193	0.000260264	Body	opensea	0.383744	0.0407043
1135	FBLIM1	cg07107113	0.204226	7.49652e-07	5'UTR	shore	-0.417734	0.0250162
1136	NOD1	cg04071779	0.525857	7.17736e-07	5'UTR	shore	-0.424138	0.0227115
1137	OSBPL3	cg25279613	-0.309454	0.00142556	5'UTR	opensea	0.475862	0.00977501
1138	TTC7A	cg15659527	-0.326294	3.47732e-08	Body	opensea	0.504433	0.00582476
1139	NOD1	cg06557644	0.35069	3.64382e-06	5'UTR	opensea	-0.376355	0.0449956
1140	FAM19A2	cg09741713	-0.209908	0.0039867	5'UTR	opensea	0.44335	0.0168277
1141	TP53INP1	cg18059933	0.463442	9.77645e-06	TSS1500	shore	-0.369951	0.0490029
1142	EBF1	cg25353990	-0.235791	0.00163764	Body	opensea	0.465025	0.0117764
1143	KDM6B	cg03524794	-0.228375	0.00603294	Body	shelf	-0.464039	0.0119744
1144	TP53INP1	cg23172400	0.236176	0.00161549	TSS1500	island	-0.538916	0.0029481
1145	ALAS1	cg15698299	0.21566	0.000280243	5'UTR	shore	-0.372906	0.0471193
1146	TTC7A	cg20090162	0.207275	0.00305865	Body	opensea	-0.461084	0.0125852
1147	PHC2	cg07570498	0.47024	6.63069e-07	5'UTR	shore	-0.433005	0.0198133
1148	DLG5	cg23963984	0.4729	3.86075e-07	Body	opensea	-0.474384	0.0100297
1149	KCNH3	cg03222868	-0.215824	0.00187521	Body	island	-0.669951	0.000104294
1150	PDIA5	cg27576434	0.278498	2.60071e-06	Body	opensea	-0.4133	0.0267222
1151	LOXHD1	cg19829856	0.28434	8.98332e-05	TSS1500	shore	-0.377833	0.0441094
1152	CYTH2	cg15246590	0.26861	8.63974e-05	3'UTR	island	-0.43399	0.0195112
1153	ID3	cg02343604	0.412795	0.000226389	3'UTR	shore	-0.550739	0.00229824
1154	ID3	cg07034850	0.338025	0.00332956	3'UTR	island	-0.536946	0.00307055
1155	ID3	cg09318066	0.348561	0.00446274	3'UTR	island	-0.524631	0.00394
1156	ID3	cg09858862	0.373629	7.96108e-05	TSS1500	shore	-0.507882	0.00545697
1157	ID3	cg11336311	0.395494	1.33722e-06	TSS1500	shore	-0.481773	0.0088105
1158	ID3	cg25287482	0.396334	0.000781694	3'UTR	island	-0.632512	0.000314989
1159	PTK2B	cg15681255	0.412793	3.48687e-08	5'UTR	opensea	-0.55468	0.00211118
1160	AMOTL2	cg08049717	0.238782	2.11627e-06	5'UTR	shore	-0.376355	0.0449956
1161	AMOTL2	cg08133629	0.408914	1.6338e-06	Body	shelf	-0.37931	0.0432374
1162	SLC6A17	cg15374686	0.30583	0.00162502	5'UTR	island	-0.432512	0.0199658
1163	MAML3	cg12426146	0.281059	0.00157058	Body	island	-0.370443	0.0486849
1164	MAML3	cg12695566	0.230689	0.00565367	Body	opensea	-0.459606	0.0129003
1165	ACTG1	cg05488523	-0.251335	0.00396943	TSS1500	island	-0.442857	0.0169608
1166	MAML3	cg23206160	0.431839	0.000181416	Body	opensea	-0.622167	0.000417131
1167	GFRA1	cg01261351	0.223691	0.00171377	Body	shore	0.395074	0.0347728
1168	GFRA1	cg12271079	0.241251	0.00529252	Body	opensea	0.406897	0.0293546
1169	GFRA1	cg25039498	0.297399	3.06497e-07	Body	opensea	0.369458	0.0493227
1170	CAMK2G	cg05395156	0.213355	3.39548e-05	Body	shore	-0.419704	0.0242874
1171	CCDC50	cg12336960	0.321844	1.39431e-07	Body	shore	-0.369951	0.0490029
1172	ACTG1	cg19517525	-0.241102	0.00394923	TSS1500	island	-0.472906	0.0102899
1173	BOC	cg05401364	0.287917	0.000169377	5'UTR	opensea	-0.542857	0.00271579
1174	BOC	cg13470462	0.212123	0.00837047	5'UTR	opensea	-0.500985	0.00621356
1175	BOC	cg24572745	0.231341	0.00736389	5'UTR	shore	-0.404926	0.0302061
1176	PPP1R3B	cg24727203	0.41107	1.86146e-05	5'UTR	shore	-0.511886	0.00453221
1177	PRKD3	cg26690127	0.242005	8.1804e-06	TSS1500	opensea	-0.380788	0.0423792
1178	CPE	cg00728503	0.226225	0.00446895	Body	opensea	-0.377833	0.0441094
1179	CADPS2	cg14371343	0.267698	0.00320093	Body	opensea	0.463054	0.0121751
1180	CADPS2	cg20665157	0.426647	3.89095e-05	Body	opensea	0.391133	0.0367503
1181	APOL3	cg23889684	0.631411	7.33369e-11	5'UTR	opensea	-0.539901	0.00288847
1182	MAP3K11	cg15976910	0.237542	7.49641e-05	Body	shore	-0.459606	0.0129003
1183	IRS1	cg05263838	0.443097	7.41429e-07	3'UTR	shelf	-0.591626	0.000906193
1184	B3GALT4	cg00163549	0.217609	0.000160332	1stExon	shore	-0.485714	0.00821344
1185	B3GALT4	cg03169472	0.212871	4.56874e-07	1stExon	shore	-0.407882	0.0289363
1186	KCNH2	cg27435498	0.219183	0.000237707	Body	island	-0.470443	0.0107363
1187	PRKAB1	cg10168009	0.288707	0.000797305	Body	shelf	-0.39803	0.0333473
1188	NAV2	cg04231888	0.306954	3.82886e-08	Body	opensea	0.534483	0.00322977
1189	NAV2	cg05491166	0.303145	0.000232009	Body	opensea	0.386207	0.0393498
1190	NAV2	cg10361765	0.301823	2.54121e-13	Body	opensea	0.648768	0.000198459
1191	GRK5	cg13739115	0.336616	7.99249e-05	Body	opensea	-0.447783	0.0156687
1192	ABLIM1	cg16327338	-0.222269	0.000606075	Body	opensea	0.452217	0.0145773
1193	GRK5	cg14351425	0.332521	0.00260217	Body	shore	-0.595567	0.000823302
1194	ADCY3	cg16888658	0.314617	1.07962e-06	TSS200	shore	-0.418227	0.0248323
1195	ADCY3	cg17644208	0.318233	0.000367459	TSS1500	shore	-0.565517	0.00166315
1196	ADCY3	cg21011133	0.446363	2.18408e-05	TSS200	shore	-0.549754	0.00234718
1197	ADCY3	cg21151432	0.488629	3.59547e-05	TSS200	shore	-0.652709	0.000176721
1198	ADCY3	cg22495460	0.334902	1.46631e-09	Body	opensea	0.450246	0.0150542
1199	ADCY3	cg26752663	0.324364	2.54951e-08	5'UTR	shore	-0.405911	0.0297779
1200	RNH1	cg23687466	0.290415	1.04971e-07	5'UTR	shore	-0.393103	0.0357504
1201	RNH1	cg23927970	0.345034	2.35996e-07	5'UTR	shore	-0.462069	0.0123787
1202	HYAL2	cg08776109	0.202894	0.000247382	Body	shore	-0.540394	0.00285905
1203	STXBP2	cg24759919	0.350236	0.00112478	Body	shore	0.513793	0.00487267
1204	TRIM62	cg25342005	0.222768	0.00220039	TSS1500	shore	-0.525123	0.00390154
1205	ARPC1B	cg08624472	0.484226	7.09932e-07	TSS1500	island	-0.54335	0.0026879
1206	ARPC1B	cg25296938	0.258974	0.000189298	5'UTR	shelf	-0.683744	6.6736e-05
1207	ARPC1B	cg26351776	0.321197	0.000350535	TSS200	island	-0.389655	0.037515
1208	LAP3	cg06859106	0.2473	8.08195e-06	Body	shelf	-0.378818	0.0435265
1209	SIL1	cg01324702	0.356166	4.66957e-11	Body	opensea	-0.640887	0.000249092
1210	KANK1	cg13883479	0.289551	0.00420154	5'UTR	opensea	-0.391626	0.0364982
1211	AGPAT3	cg04476019	0.348839	9.17375e-14	Body	shelf	-0.4867	0.00806967
1212	FRMD4A	cg04055819	0.481059	4.42303e-05	Body	opensea	0.373892	0.0465045
1213	FRMD4A	cg07828294	0.404805	2.40877e-07	Body	opensea	0.508867	0.00535561
1214	ZCCHC6	cg14134003	0.312092	3.08265e-13	Body	opensea	-0.420197	0.0241079
1215	C2	cg07880384	0.273029	7.59935e-06	3'UTR	opensea	-0.462126	0.0116074
1216	C2	cg23538064	0.201817	2.59202e-06	3'UTR	opensea	-0.485035	0.00765681
1217	STARD13	cg04895345	-0.304124	0.000586145	TSS200	opensea	-0.506404	0.00561208
1218	DECR2	cg03576748	0.245443	0.000417502	Body	shore	-0.384729	0.040158
1219	CHST8	cg15510895	0.236493	0.00106712	5'UTR	shelf	-0.369951	0.0490029
1220	SLC7A5	cg03850117	0.319449	0.00205528	Body	shore	0.37734	0.0444033
1221	HSPB1	cg07571951	0.237088	0.000938938	TSS1500	shore	-0.474877	0.00994415
1222	HSPB1	cg16567172	0.24758	0.00123684	TSS1500	shore	-0.389655	0.037515
1223	MMS19	cg17296078	0.517043	2.13834e-07	TSS1500	shore	-0.444828	0.0164337
1224	CHRNA4	cg00457195	0.302793	6.89406e-06	Body	island	0.398767	0.0321331
1225	CHRNA4	cg01618245	0.25219	2.10491e-06	Body	shore	0.385697	0.0387903
1226	CHRNA4	cg01684256	0.233089	0.000670542	3'UTR	shore	0.434032	0.0186494
1227	CHRNA4	cg10202461	0.21219	0.000145593	Body	island	0.484341	0.00775716
1228	CHRNA4	cg15567340	0.332276	6.81505e-06	3'UTR	shore	0.3746	0.0452719
1229	DERL1	cg16282024	0.258387	2.70477e-08	Body	opensea	0.370936	0.0483684
1230	FAM102B	cg18931398	0.309537	0.000160302	Body	opensea	-0.593103	0.000874294
1231	STX1A	cg20663219	0.206309	0.0035124	Body	shelf	-0.433005	0.0198133
1232	KDM6B	cg01046511	0.252271	6.5181e-13	TSS1500	shelf	-0.372414	0.0474291
1233	EP400	cg02602268	0.274186	2.61887e-05	Body	opensea	-0.395074	0.0347728
1234	EP400	cg08299299	0.20229	6.20109e-05	Body	opensea	-0.489655	0.00765114
1235	NGEF	cg02941741	0.201347	8.98368e-08	Body	island	0.499015	0.00644553
1236	NGEF	cg11972305	0.350434	0.000367621	Body	island	0.45665	0.0135505
1237	STARD13	cg11563844	-0.242125	0.0015268	TSS200	opensea	-0.463547	0.0120744
1238	NGEF	cg13862851	0.225162	0.000105981	Body	island	0.632512	0.000314989
1239	NGEF	cg19592185	0.36984	3.71838e-15	Body	opensea	0.497044	0.00668487
1240	NGEF	cg23927687	0.273006	0.000313741	Body	island	0.383744	0.0407043
1241	PDXK	cg23247068	0.218937	5.18089e-12	Body	opensea	-0.383744	0.0407043
1242	SEPT9	cg01513063	0.243059	0.00631666	Body	opensea	-0.384236	0.0404304
1243	SEPT9	cg02633924	0.386036	0.000246373	5'UTR	opensea	-0.446798	0.0159203
1244	SEPT9	cg03568017	0.326888	0.00113325	5'UTR	opensea	-0.481281	0.00888766
1245	SEPT9	cg04452095	0.401779	0.000104229	5'UTR	opensea	-0.513793	0.00487267
1246	SEPT9	cg04650676	0.269142	0.00686072	5'UTR	opensea	-0.369458	0.0493227
1247	SEPT9	cg07101841	0.253904	0.00608365	5'UTR	opensea	-0.404926	0.0302061
1248	SEPT9	cg16366686	0.255205	0.00118858	5'UTR	opensea	-0.503448	0.00593366
1249	SEPT9	cg17112975	0.20887	5.22377e-05	Body	opensea	-0.427094	0.0217088
1250	LAMB1	cg09675604	-0.431284	0.000193156	Body	opensea	-0.404433	0.0304221
1251	SEPT9	cg18241962	0.332997	4.40981e-05	5'UTR	opensea	-0.380296	0.0426637
1252	MUC20	cg05012239	-0.265431	0.00119307	TSS200	opensea	-0.487991	0.00724179
1253	SEPT9	cg23120541	0.222134	0.00352659	Body	opensea	-0.485714	0.00821344
1254	SEPT9	cg23716141	0.280725	2.41207e-05	5'UTR	opensea	-0.46601	0.0115812
1255	SEPT9	cg26079706	0.319919	9.76887e-05	Body	opensea	-0.568966	0.00153912
1256	KCNH3	cg10015871	0.307921	0.000859971	TSS1500	shore	-0.669458	0.000105927
1257	DISC1	cg05656812	0.236037	8.99133e-15	Body	opensea	-0.384729	0.040158
1258	CABLES1	cg26052586	0.272794	6.42402e-09	Body	shore	-0.39803	0.0333473
1259	C10orf10	cg05026403	0.294664	3.75789e-11	3'UTR	shore	-0.52069	0.0042596
1260	C10orf10	cg26002437	0.241902	8.67778e-13	Body	shelf	-0.409852	0.0281143
1261	ZNF532	cg06487082	0.27609	0.0076619	1stExon	shore	-0.489655	0.00765114
1262	ZNF532	cg12406559	0.320955	0.00364822	1stExon	shore	-0.382266	0.0415349
1263	ZNF532	cg17675150	0.397664	2.37277e-09	TSS1500	shore	-0.525616	0.0038634
1264	GPR98	cg20938802	0.499329	3.33001e-06	Body	shelf	-0.392118	0.0362476
1265	CD72	cg14016344	0.325742	2.10265e-08	Body	shore	-0.510837	0.00515773
1266	XPNPEP1	cg18780288	0.707164	2.97592e-11	Body	opensea	-0.444335	0.0165642
1267	CDC42EP1	cg03314604	0.274868	0.000416031	TSS200	island	-0.47931	0.00920207
1268	CDC42EP1	cg08511772	0.309246	5.59026e-06	5'UTR	shelf	-0.448276	0.0155442
1269	LARS2	cg04241282	0.406576	2.98025e-17	Body	opensea	0.368966	0.0496441
1270	FAM173B	cg17315844	-0.296068	0.000468802	Body	shore	0.484236	0.00843317
1271	DPEP2	cg10096215	0.203904	0.000232948	TSS1500	opensea	-0.455475	0.0130315
1272	DPEP2	cg10922280	0.241414	4.25948e-05	TSS1500	opensea	-0.506713	0.00503037
1273	ARHGEF10L	cg00172227	0.389981	1.43273e-19	Body	opensea	-0.473399	0.0102025
1274	ARHGEF10L	cg17285883	0.51913	1.04016e-07	5'UTR	opensea	-0.391133	0.0367503
1275	ARHGEF10L	cg20294080	0.298187	2.85133e-07	Body	opensea	-0.400493	0.0321962
1276	EHD3	cg11957382	0.224878	0.00286527	Body	shore	-0.480296	0.0090437
1277	USP53	cg26975461	0.488342	1.49906e-05	5'UTR	opensea	-0.410345	0.0279119
1278	VPS13D	cg15109449	0.378569	1.7112e-10	Body	opensea	-0.382759	0.0412565
1279	MAP6	cg09331409	0.430941	2.47462e-05	Body	opensea	-0.402463	0.0312989
1280	ABLIM1	cg03223072	0.293696	2.35699e-05	Body	opensea	-0.44335	0.0168277
1281	ABLIM1	cg03419475	0.318223	8.01413e-20	Body	opensea	-0.442365	0.0170948
1282	STARD13	cg07499182	0.475616	0.000253027	Body	opensea	0.463054	0.0121751
1283	SPSB1	cg26363759	0.292795	1.17216e-11	5'UTR	opensea	-0.458128	0.013222
1284	ENC1	cg01303236	0.257084	2.76049e-13	5'UTR	shore	-0.371429	0.0480537
1285	ZBTB5	cg21250061	0.212655	0.00200528	5'UTR	shore	-0.453202	0.0143437
1286	EPS8L2	cg00115288	0.222338	0.00422532	TSS1500	island	-0.38867	0.038032
1287	EPS8L2	cg05746617	0.213297	0.00198437	3'UTR	shore	-0.368966	0.0496441
1288	GLI3	cg09008589	-0.33312	7.74009e-05	Body	opensea	0.451724	0.0146954
1289	IFIT3	cg06188083	0.333561	0.000194595	Body	opensea	-0.402463	0.0312989
1290	VASN	cg01085165	0.208824	0.000158987	5'UTR	opensea	-0.561576	0.00181544
1291	LAMB1	cg02052536	0.220156	0.00369282	Body	opensea	0.507389	0.00550826
1292	SLCO3A1	cg12626076	0.430542	3.17486e-10	Body	shore	0.458621	0.013114
1293	SLCO3A1	cg20464948	0.30852	2.68379e-07	Body	opensea	0.536946	0.00307055
1294	SLCO3A1	cg21594043	0.494246	5.59908e-10	Body	opensea	0.650739	0.000187313
1295	MGLL	cg04155862	0.347788	0.00606099	5'UTR	shore	-0.507389	0.00550826
1296	MGLL	cg18274619	0.334863	1.00616e-05	Body	opensea	-0.577833	0.00125639
1297	AZI1	cg02069944	0.266041	6.03386e-06	Body	opensea	-0.5133	0.00491922
1298	NET1	cg13779868	0.327172	0.000335297	Body	shore	-0.499507	0.00638686
1299	MYD88	cg08548888	0.323065	0.000825245	Body	shore	-0.561084	0.0018353
1300	EMP3	cg23344780	0.23965	0.00462109	5'UTR	shelf	-0.452217	0.0145773
1301	ACOX2	cg13705284	0.218633	0.00294319	TSS1500	opensea	-0.397537	0.0335815
1302	ACOX2	cg16587010	0.204614	0.00794849	TSS1500	opensea	-0.391626	0.0364982
1303	WWOX	cg01608400	0.264169	1.4968e-05	Body	opensea	0.481773	0.0088105
1304	DYSF	cg14196395	0.416407	3.20201e-08	Body	opensea	0.426108	0.0220389
1305	GLI3	cg15751116	-0.234162	0.000147917	5'UTR	shore	0.454187	0.0141132
1306	TBC1D16	cg03837680	0.371996	0.000482784	Body	shore	-0.383744	0.0407043
1307	TBC1D16	cg10188797	0.447152	7.91473e-09	Body	shelf	-0.427094	0.0217088
1308	TBC1D16	cg20443278	0.370168	2.04076e-07	Body	shelf	-0.370936	0.0483684
1309	TBC1D16	cg25278144	0.222325	0.000439932	Body	shelf	-0.535961	0.00313341
1310	CCDC89	cg24939733	0.329522	0.00132752	TSS1500	opensea	-0.593103	0.000874294
1311	ELL	cg22813097	0.222419	5.38002e-12	Body	shelf	-0.381281	0.0420963
1312	ATP2B4	cg02457623	0.277481	0.00533292	5'UTR	shore	-0.518227	0.00447046
1313	CSF3R	cg13084345	0.322271	3.97532e-07	TSS1500	opensea	-0.400493	0.0321962
1314	CSF3R	cg14523574	0.308886	4.62827e-08	TSS200	opensea	-0.447291	0.0157941
1315	ADPRH	cg16904330	0.325689	1.54014e-05	5'UTR	shore	-0.46798	0.011199
1316	CHD7	cg02796478	0.206044	0.00577923	5'UTR	shore	-0.494089	0.00705807
1317	BCAN	cg04843111	0.239335	6.26034e-12	Body	shore	-0.429363	0.0201058
1318	BCAN	cg05654780	0.379793	2.67458e-07	Body	shore	-0.492918	0.00659237
1319	RPTOR	cg00704970	0.290659	1.10162e-05	Body	shore	-0.380788	0.0423792
1320	RPTOR	cg02185248	0.353075	7.83893e-10	Body	opensea	-0.4133	0.0267222
1321	RPTOR	cg07964113	0.279391	3.18286e-24	Body	island	0.397044	0.0338171
1322	RPTOR	cg09803959	0.425905	7.72795e-06	Body	shore	-0.37734	0.0444033
1323	RPTOR	cg17060157	0.523102	3.93171e-10	Body	shelf	-0.453202	0.0143437
1324	GLI3	cg17390350	-0.212477	1.41431e-05	5'UTR	island	0.387685	0.0385547
1325	ANKS1A	cg07254055	0.339566	1.46565e-12	Body	opensea	0.547291	0.00247352
1326	ANKS1A	cg08194377	0.508395	1.23628e-08	Body	opensea	-0.380788	0.0423792
1327	SH3PXD2A	cg02432295	0.38501	1.91403e-10	Body	opensea	-0.484236	0.00843317
1328	SH3PXD2A	cg02722808	0.419809	2.19321e-10	Body	opensea	-0.515764	0.00469024
1329	GLI3	cg17588800	0.217485	0.0016854	TSS1500	shore	-0.605419	0.000644352
1330	HIVEP2	cg12269161	0.355671	2.57046e-07	5'UTR	opensea	-0.416749	0.0253873
1331	ZNRF3	cg12968041	0.44251	4.64435e-06	5'UTR	shore	-0.539409	0.00291815
1332	IFI30	cg07533630	0.342963	1.41897e-05	TSS1500	shore	-0.438424	0.0181988
1333	HIVEP2	cg10577216	-0.227577	6.51803e-05	5'UTR	shore	-0.484236	0.00843317
1334	IFI30	cg26152923	0.314928	4.0696e-06	TSS1500	shore	-0.461084	0.0125852
1335	PPFIA4	cg02479986	0.302919	2.01852e-05	Body	opensea	-0.451232	0.0148142
1336	KEAP1	cg10505024	0.216299	2.84845e-05	Body	island	-0.42266	0.0232271
1337	PLBD1	cg04473902	0.326352	8.72401e-09	TSS1500	shore	-0.662562	0.000131272
1338	PLBD1	cg11905611	0.343363	1.11997e-07	TSS200	island	-0.539409	0.00291815
1339	PDE4DIP	cg05771459	-0.314976	0.000958791	Body	opensea	0.494581	0.00699467
1340	PLBD1	cg17768691	0.361562	1.95808e-08	TSS200	island	-0.489163	0.00771958
1341	PLBD1	cg19725903	0.256972	0.00454808	TSS1500	island	-0.376355	0.0449956
1342	PLBD1	cg25642234	0.408386	1.47248e-08	TSS1500	island	-0.523153	0.00405734
1343	FABP3	cg14407437	0.233101	0.00239825	TSS200	opensea	-0.442857	0.0169608
1344	ATOH8	cg21068480	0.410569	9.66123e-06	TSS1500	island	-0.41212	0.0263176
1345	VAMP8	cg12542933	0.251849	0.00504723	5'UTR	opensea	-0.715271	2.20709e-05
1346	TULP4	cg09057412	0.43821	1.21362e-10	Body	opensea	-0.397044	0.0338171
1347	GRID1	cg15209053	-0.457165	9.81602e-05	Body	opensea	0.675862	8.637e-05
1348	KLHDC7B	cg04177826	0.328496	1.60898e-05	TSS1500	island	0.418496	0.0238602
1349	SUSD3	cg13916469	0.306449	4.42422e-08	Body	opensea	-0.378019	0.0431893
1350	PRRT3	cg01142302	0.265023	1.1693e-05	Body	island	-0.480788	0.00896539
1351	NAB2	cg23550060	0.323527	2.57308e-05	Body	shore	-0.640887	0.000249092
1352	MARCKSL1	cg00292107	0.258148	0.00463454	Body	shore	-0.429557	0.0209015
1353	UTRN	cg04167205	-0.249362	0.00314984	Body	opensea	0.559113	0.00191664
1354	PSMB9	cg02567488	0.31575	0.00013037	Body	shore	-0.380296	0.0426637
1355	FMO2	cg05822335	0.44901	4.47334e-06	3'UTR	opensea	0.432726	0.019048
1356	GPR125	cg19861632	0.304293	3.73966e-05	Body	opensea	0.391626	0.0364982
1357	NFE2L2	cg21382890	0.628811	5.83226e-08	Body	opensea	-0.591626	0.000906193
1358	NFE2L2	cg26271591	0.376252	0.000223883	Body	shelf	-0.372906	0.0471193
1359	JARID2	cg13077031	0.200157	7.05349e-07	Body	opensea	0.383744	0.0407043
1360	JARID2	cg14662750	0.217397	0.00152295	Body	opensea	-0.446305	0.0160474
1361	NT5E	cg23172664	0.445758	1.74323e-08	Body	opensea	-0.556158	0.00204451
1362	ZFHX3	cg01779559	0.569814	9.86361e-09	Body	opensea	-0.441379	0.0173654
1363	ZFHX3	cg03805182	0.55102	1.51002e-07	5'UTR	shelf	-0.557143	0.00200109
1364	ZFHX3	cg05972185	0.275369	4.30474e-07	Body	opensea	-0.405911	0.0297779
1365	UTRN	cg23356505	-0.47348	1.63737e-05	1stExon	opensea	0.76798	3.19613e-06
1366	ZFHX3	cg06086177	0.275724	0.00366296	5'UTR	shore	-0.606897	0.000620682
1367	ZFHX3	cg09754243	0.418778	2.75589e-18	5'UTR	shore	-0.39803	0.0333473
1368	ZCCHC14	cg07460992	-0.234448	2.03308e-06	Body	opensea	-0.416256	0.0255745
1369	ZFHX3	cg10104480	0.259221	3.10332e-08	Body	opensea	-0.449261	0.0152976
1370	ZFHX3	cg10162659	0.508641	5.12789e-10	5'UTR	opensea	-0.381281	0.0420963
1371	ZMYND8	cg13699808	-0.299713	4.04811e-10	Body	opensea	-0.511823	0.00506116
1372	ZFHX3	cg10298741	0.289368	0.000216041	5'UTR	opensea	-0.42266	0.0232271
1373	NAA38	cg27595580	-0.291237	0.0014163	Body	shelf	0.530542	0.00349935
1374	ZFHX3	cg10472320	0.349017	9.76048e-06	Body	opensea	-0.378818	0.0435265
1375	CSK	cg02566978	0.498899	1.95021e-05	5'UTR	shore	-0.610837	0.000561236
1376	CKB	cg12935359	0.243103	0.00598311	Body	island	-0.557143	0.00200109
1377	SERINC5	cg01267797	0.460266	2.19312e-06	Body	opensea	-0.497044	0.00668487
1378	XRCC3	cg12798040	0.215354	1.05388e-08	Body	opensea	0.413793	0.026528
1379	XRCC3	cg27170268	0.258973	7.60066e-07	Body	opensea	0.416256	0.0255745
1380	KNDC1	cg17838816	0.218852	1.48038e-06	Body	shore	-0.479803	0.00912259
1381	FAM179A	cg05707236	0.248646	0.000580636	5'UTR	opensea	-0.430125	0.0198621
1382	SNX8	cg08827122	0.255699	0.000552517	Body	shelf	-0.403448	0.0308579
1383	SGPP2	cg01157046	0.431697	2.82203e-07	Body	opensea	-0.53399	0.00326246
1384	SGPP2	cg11300809	0.285821	0.000504962	TSS1500	shore	-0.570936	0.00147192
1385	MGAT5B	cg06576940	0.27928	9.8494e-09	Body	shore	0.407409	0.0282626
1386	NARF	cg05613273	-0.23991	0.00554811	5'UTR	shelf	-0.394581	0.0350151
1387	STK24	cg01185345	0.307322	0.000162942	Body	opensea	-0.408374	0.028729
1388	STK24	cg08402963	0.343598	4.64799e-07	Body	opensea	-0.465517	0.0116785
1389	CLYBL	cg00988050	0.266055	1.70854e-05	Body	opensea	-0.437438	0.0184839
1390	MAN1C1	cg16836311	0.537043	1.71576e-08	1stExon	island	-0.422167	0.0234011
1391	BACE2	cg16334795	0.299029	0.00567031	TSS1500	shore	0.384729	0.040158
1392	LDB2	cg03368758	0.224315	1.17474e-06	TSS1500	opensea	-0.398522	0.0331144
[truncated: 1,131 more rows]

## Sheet: Table S4
Supplementary Table S4
[truncated: 337 more rows]

## Sheet: Table S5
Supplementary Table S5
[truncated: 860 more rows]

[truncated: 2 more sheets: Table S6, Table S7]
